# Supplementary material for: A Drosophila model for toxicogenomics: Genetic variation in susceptibility to heavy metal exposure
Source: PubMed Central journal article supplement (PMC5544243; doi:10.1371/journal.pgen.1006907), 2017-07-21

Dose-response Curve for Lead Supplemented Medium

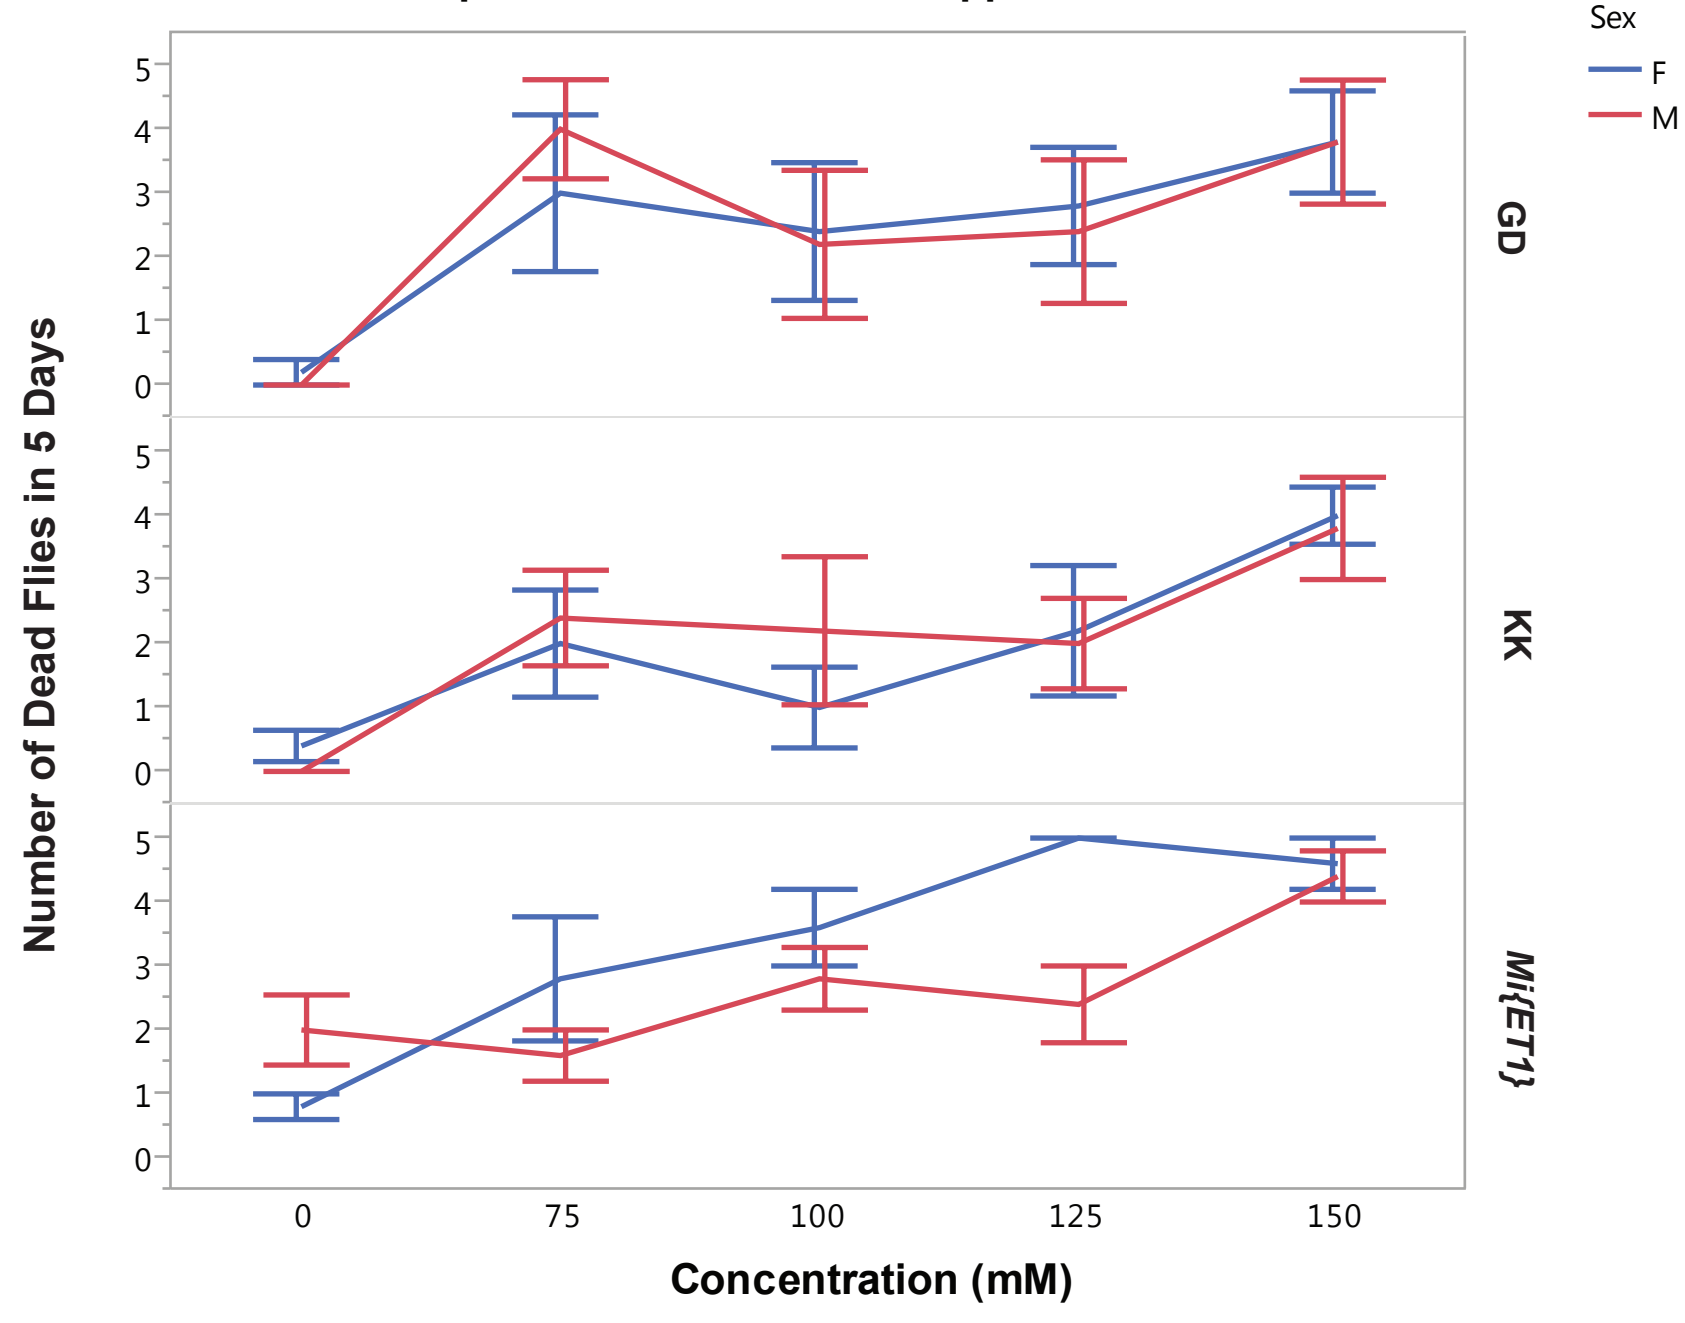

Dose-response Curve for Cd Supplemented Medium

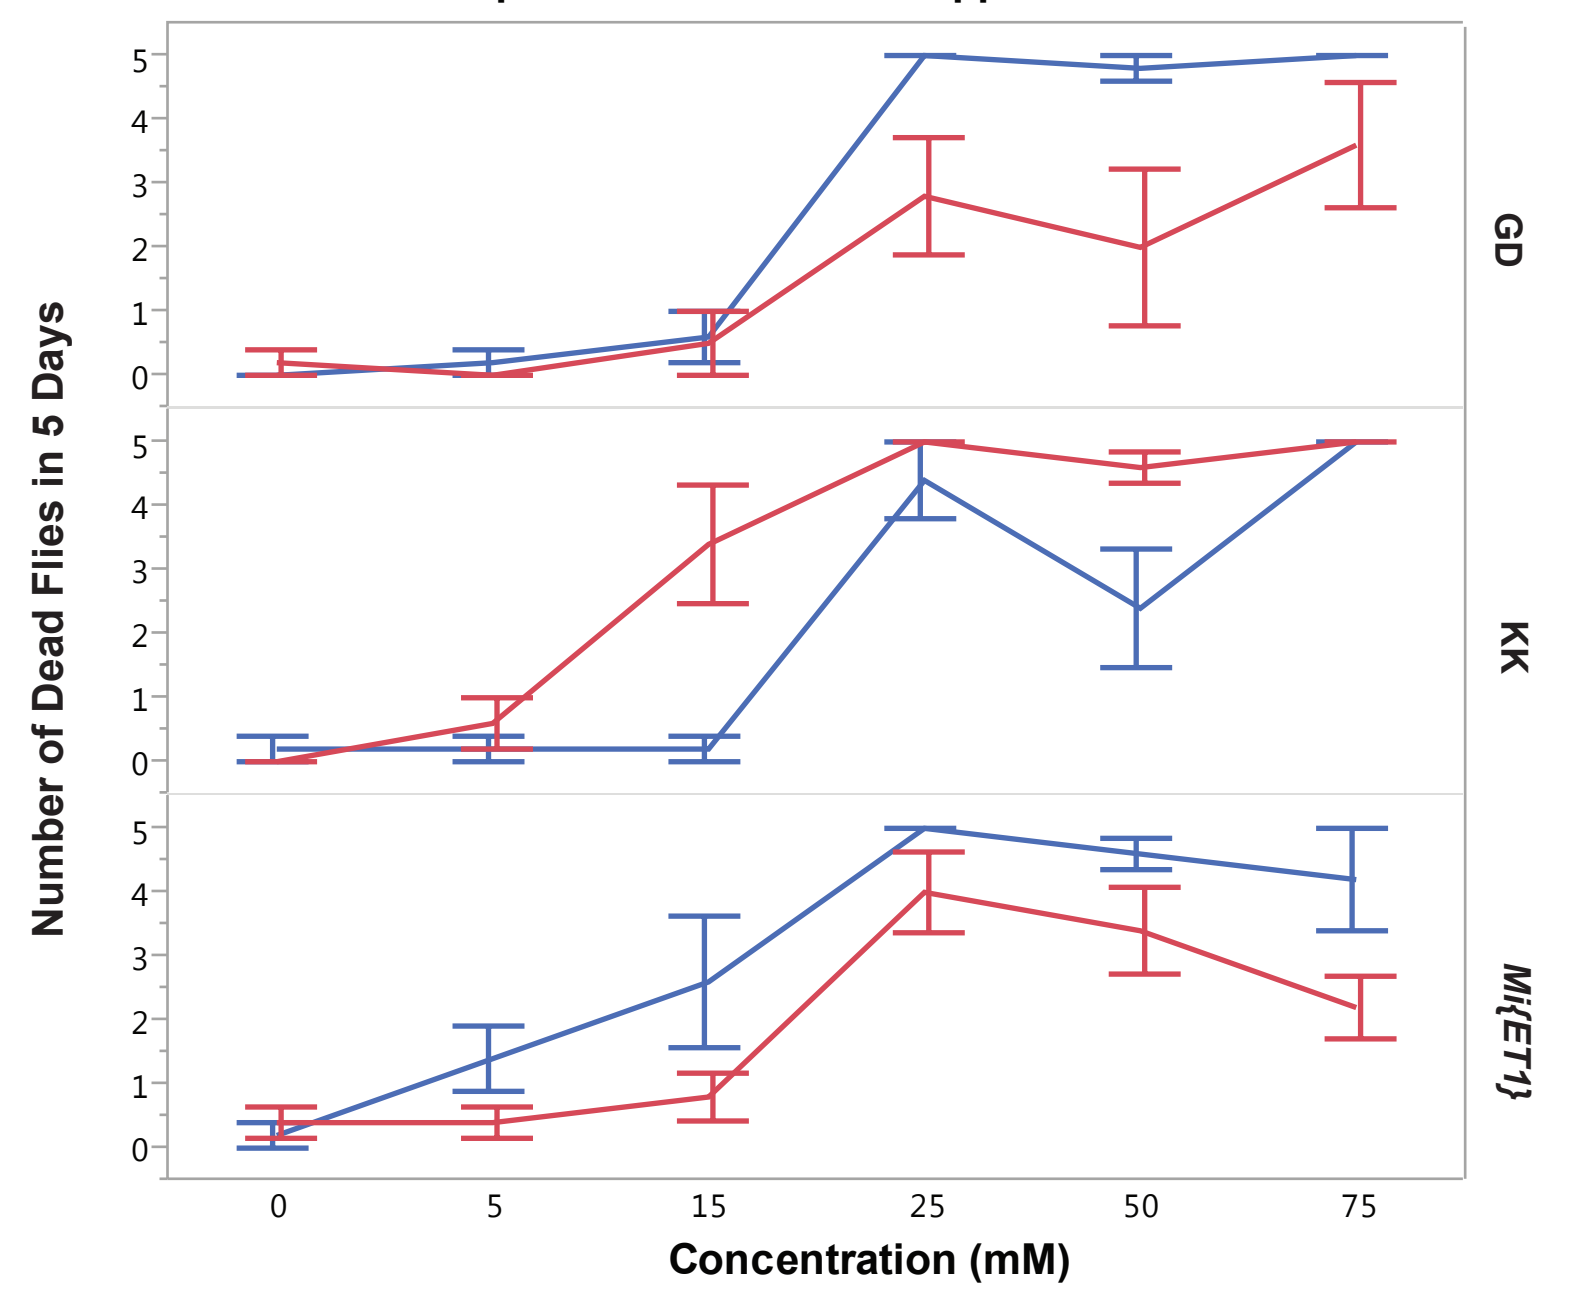

Supplement: pgen.1006907.s003.pdf [file pgen.1006907.s003.pdf]
