# Supplementary material for: A Drosophila model for toxicogenomics: Genetic variation in susceptibility to heavy metal exposure
Source: PLoS Genet. 2017 Jul 21;13(7):e1006907. doi: 10.1371/journal.pgen.1006907 (PMC5544243; doi:10.1371/journal.pgen.1006907)
Supplement: S1 Table — (XLSX) [file pgen.1006907.s006.xlsx]

## Sheet: Female
S1 Table: Extreme QTL analysis for adult female resistance to lead exposure. Filter 1, Count 1 and Frequency 1 are filter, count and frequency of minor alleles from the resistant population, respectively. Filter 2, Count 2 and Frequency 2 are filter, count and frequency of minor alleles from the control population, respectively.
SNP ID	Chromosome Position	Reference Allele	Major Allele	Minor Allele	Filter 1	Count 1	Frequency 1	Filter 2	Count 2	Frequency 2	P-value	FDR	Flybase ID	Gene Symbol	Site Class	Position (bp Upstream or Downstream)
2L_10016273_SNP	10016273	C	C	G	PASS	33931	0.0837838	AF	3670	0	7.89471e-06	0.0130032	FBgn0032175	CG13131	NON_SYNONYMOUS_CODING
2L_10035816_SNP	10035816	T	C	T	AF	35913	0.0349462	PASS	29946	0.133333	0.00017497	0.0423821	FBgn0027600	obst-B	INTRON
2L_1006665_SNP	1006665	A	A	G	PASS	143202	0.585507	PASS	209142	0.404558	0.00014593	0.039402	Intergenic	Intergenic
2L_1006677_SNP	1006677	G	T	G	PASS	212141	0.399433	PASS	142205	0.590778	5.73713e-05	0.0275891	Intergenic	Intergenic
2L_10105106_SNP	10105106	C	C	T	PASS	17666	0.272727	PASS	27839	0.123028	0.0002662	0.0499106	FBgn0083945	CG34109	INTRON
2L_10105106_SNP	10105106	C	C	T	PASS	17666	0.272727	PASS	27839	0.123028	0.0002662	0.0499106	FBgn0265002	CG44153	INTRON
2L_10111085_SNP	10111085	G	A	G	PASS	19690	0.314685	PASS	29635	0.10574	2.38345e-07	0.00315975	FBgn0265002	CG44153	INTRON
2L_10111085_SNP	10111085	G	A	G	PASS	19690	0.314685	PASS	29635	0.10574	2.38345e-07	0.00315975	FBgn0083945	CG34109	INTRON
2L_10136027_SNP	10136027	G	G	C	PASS	32217	0.0501475	PASS	32561	0.158031	0.00017664	0.0425344	FBgn0265002	CG44153	INTRON
2L_1020030_SNP	1020030	G	C	G	PASS	201102	0.336634	PASS	128150	0.539568	5.26e-05	0.0268881	FBgn0031294	IA-2	INTRON
2L_1020341_SNP	1020341	C	C	A	PASS	32340	0.110193	PASS	26989	0.248603	0.00012928	0.0375464	FBgn0031294	IA-2	INTRON
2L_1022382_SNP	1022382	T	C	T	PASS	27396	0.260163	PASS	222164	0.42487	0.0001875	0.0434881	FBgn0031294	IA-2	INTRON
2L_1022518_SNP	1022518	T	G	T	PASS	34387	0.202326	PASS	263145	0.355392	0.00015048	0.0397958	FBgn0031294	IA-2	INTRON
2L_1023575_SNP	1023575	A	C	A	PASS	37851	0.118881	PASS	290105	0.265823	3.822e-05	0.023507	FBgn0031294	IA-2	INTRON
2L_10242000_SNP	10242000	C	C	T	PASS	30690	0.227273	PASS	233147	0.386842	0.0001738	0.0422433	FBgn0004419	me31B	SYNONYMOUS_CODING
2L_10242000_SNP	10242000	C	C	T	PASS	30690	0.227273	PASS	233147	0.386842	0.0001738	0.0422433	FBgn0024248	chico	DOWNSTREAM	512
2L_10242000_SNP	10242000	C	C	T	PASS	30690	0.227273	PASS	233147	0.386842	0.0001738	0.0422433	FBgn0266330	CR44995	UPSTREAM	685
2L_10269735_SNP	10269735	A	C	A	PASS	25886	0.25	PASS	34641	0.105943	6.0883e-05	0.0281951	FBgn0032205	CG4957	INTRON
2L_10269735_SNP	10269735	A	C	A	PASS	25886	0.25	PASS	34641	0.105943	6.0883e-05	0.0281951	FBgn0260750	Mulk	UPSTREAM	316
2L_10269735_SNP	10269735	A	C	A	PASS	25886	0.25	PASS	34641	0.105943	6.0883e-05	0.0281951	FBgn0032204	CG4953	DOWNSTREAM	987
2L_10273144_SNP	10273144	T	T	C	PASS	28071	0.202279	PASS	250138	0.35567	0.00025793	0.0491521	FBgn0260749	Utx	INTRON
2L_10273144_SNP	10273144	T	T	C	PASS	28071	0.202279	PASS	250138	0.35567	0.00025793	0.0491521	FBgn0003751	trk	UPSTREAM	82
2L_10273936_SNP	10273936	C	T	C	PASS	219146	0.4	PASS	30698	0.242574	0.0002661	0.0499052	FBgn0260749	Utx	INTRON
2L_10322860_SNP	10322860	A	G	A	PASS	245101	0.291908	PASS	193173	0.472678	8.46466e-05	0.0319062	FBgn0032218	CG5381	INTRON
2L_10322860_SNP	10322860	A	G	A	PASS	245101	0.291908	PASS	193173	0.472678	8.46466e-05	0.0319062	FBgn0032219	CG4995	INTRON
2L_10322866_SNP	10322866	A	C	A	PASS	246107	0.303116	PASS	190173	0.476584	0.00016609	0.0414716	FBgn0032218	CG5381	INTRON
2L_10322866_SNP	10322866	A	C	A	PASS	246107	0.303116	PASS	190173	0.476584	0.00016609	0.0414716	FBgn0032219	CG4995	INTRON
2L_10322880_SNP	10322880	T	C	T	PASS	206101	0.32899	PASS	165186	0.529915	2.943e-05	0.0215241	FBgn0032218	CG5381	INTRON
2L_10322880_SNP	10322880	T	C	T	PASS	206101	0.32899	PASS	165186	0.529915	2.943e-05	0.0215241	FBgn0032219	CG4995	INTRON
2L_10322883_SNP	10322883	C	T	C	PASS	20898	0.320261	PASS	163186	0.532951	9.87635e-06	0.0140144	FBgn0032219	CG4995	INTRON
2L_10322883_SNP	10322883	C	T	C	PASS	20898	0.320261	PASS	163186	0.532951	9.87635e-06	0.0140144	FBgn0032218	CG5381	INTRON
2L_10322884_SNP	10322884	G	A	G	PASS	20795	0.31457	PASS	164185	0.530086	7.66574e-06	0.0128728	FBgn0032218	CG5381	INTRON
2L_10322884_SNP	10322884	G	A	G	PASS	20795	0.31457	PASS	164185	0.530086	7.66574e-06	0.0128728	FBgn0032219	CG4995	INTRON
2L_10322889_SNP	10322889	T	C	T	PASS	217101	0.31761	PASS	174187	0.518006	2.388e-05	0.0200582	FBgn0032218	CG5381	INTRON
2L_10322889_SNP	10322889	T	C	T	PASS	217101	0.31761	PASS	174187	0.518006	2.388e-05	0.0200582	FBgn0032219	CG4995	INTRON
2L_10322900_SNP	10322900	G	T	G	PASS	238100	0.295858	PASS	189183	0.491935	2.28853e-05	0.0195911	FBgn0032219	CG4995	INTRON
2L_10322900_SNP	10322900	G	T	G	PASS	238100	0.295858	PASS	189183	0.491935	2.28853e-05	0.0195911	FBgn0032218	CG5381	UTR_5_PRIME
2L_10414173_SNP	10414173	C	G	C	PASS	25078	0.237805	PASS	225151	0.401596	0.00022115	0.0463575	FBgn0032243	Klp31E	INTRON
2L_10414173_SNP	10414173	C	G	C	PASS	25078	0.237805	PASS	225151	0.401596	0.00022115	0.0463575	FBgn0032242	CG5355	UPSTREAM	71
2L_10415466_SNP	10415466	T	T	A	PASS	26853	0.165109	PASS	35220	0.0537634	0.00019047	0.0437535	FBgn0032243	Klp31E	INTRON
2L_10441173_SNP	10441173	C	C	T	PASS	28578	0.214876	PASS	38427	0.0656934	3.26272e-06	0.0093224	FBgn0032251	CG13142	DOWNSTREAM	126
2L_10441173_SNP	10441173	C	C	T	PASS	28578	0.214876	PASS	38427	0.0656934	3.26272e-06	0.0093224	FBgn0266915	CR45375	DOWNSTREAM	647
2L_10445880_SNP	10445880	C	C	A	PASS	133165	0.553691	PASS	217129	0.372832	0.00021073	0.0455185	FBgn0032252	loh	SYNONYMOUS_CODING
2L_10451548_SNP	10451548	C	C	T	PASS	29350	0.145773	PASS	267114	0.299213	8.98976e-05	0.0326159	FBgn0065110	ppk10	SYNONYMOUS_CODING
2L_10458723_SNP	10458723	G	A	G	PASS	144220	0.604396	PASS	225146	0.393531	6.73803e-06	0.0121976	FBgn0027611	LM408	SYNONYMOUS_CODING
2L_10459467_SNP	10459467	T	T	C	PASS	28460	0.174419	PASS	34821	0.0569106	0.0001029	0.0343494	FBgn0027611	LM408	INTRON
2L_10462888_SNP	10462888	C	C	A	PASS	24773	0.228125	PASS	239154	0.391858	0.00019061	0.0437597	FBgn0027611	LM408	DOWNSTREAM	416
2L_10462888_SNP	10462888	C	C	A	PASS	24773	0.228125	PASS	239154	0.391858	0.00019061	0.0437597	FBgn0051719	RluA-1	DOWNSTREAM	452
2L_10477395_SNP	10477395	T	T	C	PASS	255105	0.291667	PASS	201171	0.459677	0.00021704	0.0460531	FBgn0032256	RluA-2	NON_SYNONYMOUS_CODING
2L_10480609_SNP	10480609	T	T	A	PASS	28379	0.218232	PASS	214144	0.402235	2.45482e-05	0.0202326	FBgn0032256	RluA-2	INTRON
2L_10480926_SNP	10480926	T	T	C	PASS	29796	0.244275	PASS	229168	0.423174	3.4686e-05	0.0228336	FBgn0032256	RluA-2	INTRON
2L_10480958_SNP	10480958	C	C	A	PASS	32382	0.202469	PASS	234149	0.389034	8.32183e-06	0.0131298	FBgn0032256	RluA-2	INTRON
2L_10480959_SNP	10480959	G	G	C	PASS	32181	0.201493	PASS	238149	0.385013	1.09711e-05	0.0145786	FBgn0032256	RluA-2	INTRON
2L_10480968_SNP	10480968	A	A	G	PASS	32387	0.212195	PASS	246161	0.395577	1.10671e-05	0.0146073	FBgn0032256	RluA-2	INTRON
2L_10480974_SNP	10480974	T	T	C	PASS	32083	0.205955	PASS	238138	0.367021	0.00010889	0.0350721	FBgn0032256	RluA-2	INTRON
2L_10480975_SNP	10480975	A	A	C	PASS	31982	0.204489	PASS	243139	0.363874	0.00012031	0.0365084	FBgn0032256	RluA-2	INTRON
2L_10480981_SNP	10480981	T	T	C	PASS	31190	0.224439	PASS	238147	0.381818	0.00019098	0.0438076	FBgn0032256	RluA-2	INTRON
2L_10485737_SNP	10485737	G	G	A	PASS	30497	0.241895	PASS	35245	0.11335	0.00023181	0.0472154	FBgn0032258	CG7456	UTR_3_PRIME
2L_10485737_SNP	10485737	G	G	A	PASS	30497	0.241895	PASS	35245	0.11335	0.00023181	0.0472154	FBgn0026431	Grip75	UTR_3_PRIME
2L_10488763_SNP	10488763	G	A	G	PASS	27186	0.240896	PASS	217152	0.411924	0.00010515	0.0346247	FBgn0032259	CG6144	UPSTREAM	83
2L_10488763_SNP	10488763	G	A	G	PASS	27186	0.240896	PASS	217152	0.411924	0.00010515	0.0346247	FBgn0032258	CG7456	UPSTREAM	141
2L_10488814_SNP	10488814	A	T	A	PASS	30392	0.232911	PASS	231156	0.403101	7.01474e-05	0.0298624	FBgn0032259	CG6144	UPSTREAM	32
2L_10488814_SNP	10488814	A	T	A	PASS	30392	0.232911	PASS	231156	0.403101	7.01474e-05	0.0298624	FBgn0032258	CG7456	UPSTREAM	192
2L_10488823_SNP	10488823	C	A	C	PASS	295102	0.256927	PASS	221161	0.421466	0.00015919	0.0407402	FBgn0032259	CG6144	UPSTREAM	23
2L_10488823_SNP	10488823	C	A	C	PASS	295102	0.256927	PASS	221161	0.421466	0.00015919	0.0407402	FBgn0032258	CG7456	UPSTREAM	21
2L_10491160_SNP	10491160	A	A	G	PASS	217100	0.315457	PASS	22140	0.153257	0.00016363	0.0412424	FBgn0032260	CG13144	SYNONYMOUS_CODING
2L_10491160_SNP	10491160	A	A	G	PASS	217100	0.315457	PASS	22140	0.153257	0.00016363	0.0412424	FBgn0086347	Myo31DF	DOWNSTREAM	654
2L_10491160_SNP	10491160	A	A	G	PASS	217100	0.315457	PASS	22140	0.153257	0.00016363	0.0412424	FBgn0032259	CG6144	DOWNSTREAM	699
2L_10505498_SNP	10505498	G	A	G	PASS	273128	0.319202	PASS	39483	0.174004	0.00015412	0.0402768	FBgn0086347	Myo31DF	INTRON
2L_10505498_SNP	10505498	G	A	G	PASS	273128	0.319202	PASS	39483	0.174004	0.00015412	0.0402768	FBgn0265155	CR44224	UPSTREAM	83
2L_10505541_SNP	10505541	G	G	C	PASS	31488	0.218905	PASS	257184	0.417234	2.19055e-06	0.007782	FBgn0086347	Myo31DF	INTRON
2L_10505541_SNP	10505541	G	G	C	PASS	31488	0.218905	PASS	257184	0.417234	2.19055e-06	0.007782	FBgn0265155	CR44224	UPSTREAM	76
2L_10521155_SNP	10521155	T	C	T	PASS	15784	0.348548	PASS	119149	0.55597	8.30448e-05	0.0316936	Intergenic	Intergenic
2L_10526485_SNP	10526485	T	A	T	PASS	193202	0.511392	PASS	246104	0.297143	2.94461e-06	0.00894765	Intergenic	Intergenic
2L_10530945_SNP	10530945	T	T	G	PASS	27441	0.130159	PASS	24191	0.274096	0.00023928	0.0477705	FBgn0032264	Lip4	SYNONYMOUS_CODING
2L_10530945_SNP	10530945	T	T	G	PASS	27441	0.130159	PASS	24191	0.274096	0.00023928	0.0477705	FBgn0032265	CG18301	UPSTREAM	876
2L_10533841_SNP	10533841	G	G	T	PASS	34932	0.0839895	PASS	30983	0.211735	9.56351e-05	0.033504	FBgn0032265	CG18301	DOWNSTREAM	194
2L_10533841_SNP	10533841	G	G	T	PASS	34932	0.0839895	PASS	30983	0.211735	9.56351e-05	0.033504	FBgn0032266	CG18302	UPSTREAM	481
2L_10546602_SNP	10546602	A	A	T	PASS	214140	0.39548	PASS	173233	0.573892	0.00012066	0.0365271	FBgn0051721	Trim9	INTRON
2L_10548155_SNP	10548155	T	T	C	PASS	31546	0.127424	PASS	260106	0.289617	2.163e-05	0.0191962	FBgn0051721	Trim9	INTRON
2L_10560383_SNP	10560383	T	T	G	PASS	192118	0.380645	PASS	138177	0.561905	0.00023276	0.0472958	FBgn0051721	Trim9	INTRON
2L_10560409_SNP	10560409	T	T	G	PASS	202109	0.350482	PASS	153180	0.540541	9.12956e-05	0.0328287	FBgn0051721	Trim9	INTRON
2L_10560411_SNP	10560411	T	T	C	PASS	211109	0.340625	PASS	155182	0.540059	3.504e-05	0.022945	FBgn0051721	Trim9	INTRON
2L_10568683_SNP	10568683	T	T	C	PASS	26373	0.217262	PASS	36133	0.0837563	7.205e-05	0.030113	FBgn0051721	Trim9	INTRON
2L_10568683_SNP	10568683	T	T	C	PASS	26373	0.217262	PASS	36133	0.0837563	7.205e-05	0.030113	FBgn0032268	CG6138	DOWNSTREAM	671
2L_10568729_SNP	10568729	C	C	T	PASS	26963	0.189759	PASS	35027	0.071618	0.00021982	0.0462464	FBgn0051721	Trim9	INTRON
2L_10568729_SNP	10568729	C	C	T	PASS	26963	0.189759	PASS	35027	0.071618	0.00021982	0.0462464	FBgn0032268	CG6138	DOWNSTREAM	717
2L_10575365_SNP	10575365	A	G	A	PASS	21734	0.135458	PASS	17779	0.308594	8.41742e-05	0.0318338	FBgn0051721	Trim9	INTRON
2L_10575365_SNP	10575365	A	G	A	PASS	21734	0.135458	PASS	17779	0.308594	8.41742e-05	0.0318338	FBgn0032269	w-cup	DOWNSTREAM	495
2L_10577175_SNP	10577175	A	A	T	PASS	337104	0.235828	PASS	277183	0.397826	7.84721e-05	0.0310299	FBgn0051721	Trim9	INTRON
2L_10577175_SNP	10577175	A	A	T	PASS	337104	0.235828	PASS	277183	0.397826	7.84721e-05	0.0310299	FBgn0032269	w-cup	NON_SYNONYMOUS_CODING
2L_10664285_SNP	10664285	T	G	T	PASS	128118	0.479675	PASS	23791	0.277439	4.51586e-05	0.0252513	FBgn0051871	CG31871	INTRON
2L_10664287_SNP	10664287	A	G	A	PASS	132116	0.467742	PASS	24091	0.274924	9.01248e-05	0.0326608	FBgn0051871	CG31871	INTRON
2L_10668571_SNP	10668571	T	A	T	PASS	32222	0.0639535	PASS	32477	0.19202	4.098e-05	0.0241612	FBgn0051871	CG31871	INTRON
2L_10668648_SNP	10668648	T	T	A	PASS	27625	0.0830565	PASS	25671	0.217125	0.00013972	0.0386177	FBgn0051871	CG31871	INTRON
2L_1067807_SNP	1067807	C	C	G	PASS	281111	0.283163	PASS	35050	0.125	1.82061e-05	0.0179886	FBgn0003310	S	INTRON
2L_10682653_SNP	10682653	T	T	G	PASS	33537	0.0994624	PASS	329104	0.240185	4.02369e-05	0.0240453	FBgn0032281	CG17107	DOWNSTREAM	125
2L_10682653_SNP	10682653	T	T	G	PASS	33537	0.0994624	PASS	329104	0.240185	4.02369e-05	0.0240453	FBgn0032282	CG7299	DOWNSTREAM	774
2L_10682653_SNP	10682653	T	T	G	PASS	33537	0.0994624	PASS	329104	0.240185	4.02369e-05	0.0240453	FBgn0032280	CG17105	DOWNSTREAM	878
2L_10684234_SNP	10684234	C	C	T	PASS	18476	0.292308	PASS	24837	0.129825	0.00011742	0.0361925	FBgn0032282	CG7299	NON_SYNONYMOUS_CODING
2L_10687104_SNP	10687104	G	G	A	PASS	179156	0.465672	PASS	21078	0.270833	4.4557e-05	0.02506	FBgn0032283	CG7296	UPSTREAM	38
2L_10711044_SNP	10711044	C	C	T	PASS	26354	0.170347	PASS	35119	0.0513513	7.69482e-05	0.0308392	FBgn0265580	CR44407	DOWNSTREAM	311
2L_10716141_SNP	10716141	A	G	A	PASS	25861	0.191223	PASS	249133	0.348168	0.00020726	0.0452993	Intergenic	Intergenic
2L_10720541_SNP	10720541	G	T	G	PASS	164114	0.410072	PASS	22568	0.232082	0.00017795	0.042646	Intergenic	Intergenic
2L_10729872_SNP	10729872	T	C	T	PASS	22537	0.141221	PASS	18083	0.315589	7.22218e-05	0.0301266	FBgn0032290	CG6443	SYNONYMOUS_CODING
2L_10729872_SNP	10729872	T	C	T	PASS	22537	0.141221	PASS	18083	0.315589	7.22218e-05	0.0301266	FBgn0032291	CG17118	UPSTREAM	383
2L_10735812_SNP	10735812	A	A	C	PASS	119117	0.495763	PASS	21582	0.276094	1.59873e-05	0.017194	FBgn0027868	Nup107	NON_SYNONYMOUS_CODING
2L_10735812_SNP	10735812	A	A	C	PASS	119117	0.495763	PASS	21582	0.276094	1.59873e-05	0.017194	FBgn0032294	Vha16-5	DOWNSTREAM	57
2L_10735876_SNP	10735876	G	G	C	PASS	107103	0.490476	PASS	19481	0.294545	0.00021181	0.0456179	FBgn0027868	Nup107	NON_SYNONYMOUS_CODING
2L_10735876_SNP	10735876	G	G	C	PASS	107103	0.490476	PASS	19481	0.294545	0.00021181	0.0456179	FBgn0032294	Vha16-5	DOWNSTREAM	443
2L_10748042_SNP	10748042	A	A	T	PASS	24784	0.253776	PASS	205153	0.427374	0.00012815	0.0374254	FBgn0032297	CG17124	INTRON
2L_10748046_SNP	10748046	T	T	C	PASS	25683	0.244838	PASS	204149	0.422096	8.21917e-05	0.0316178	FBgn0032297	CG17124	INTRON
2L_10748048_SNP	10748048	T	T	C	PASS	25382	0.244776	PASS	204146	0.417143	0.00013128	0.0376776	FBgn0032297	CG17124	INTRON
2L_10748049_SNP	10748049	A	A	T	PASS	25785	0.248538	PASS	204147	0.418803	0.00015433	0.040284	FBgn0032297	CG17124	INTRON
2L_10752759_SNP	10752759	T	A	T	PASS	204170	0.454545	PASS	286114	0.285	0.00014019	0.0386751	FBgn0032297	CG17124	INTRON
2L_10753216_SNP	10753216	A	A	C	PASS	32752	0.137203	PASS	249106	0.298592	3.04412e-05	0.0216627	FBgn0032297	CG17124	INTRON
2L_10753434_SNP	10753434	A	A	C	PASS	32358	0.152231	PASS	276123	0.308271	5.60857e-05	0.0273541	FBgn0032297	CG17124	INTRON
2L_10758327_SNP	10758327	C	T	C	PASS	33477	0.187348	PASS	39128	0.0668258	6.13714e-05	0.02831	Intergenic	Intergenic
2L_1076480_SNP	1076480	A	A	T	PASS	24013	0.0513834	PASS	22950	0.179211	0.00012362	0.0368159	FBgn0003310	S	INTRON
2L_1077978_SNP	1077978	A	A	T	PASS	25757	0.181529	PASS	203108	0.347267	0.0001394	0.0385926	FBgn0015905	ast	UTR_5_PRIME
2L_1077978_SNP	1077978	A	A	T	PASS	25757	0.181529	PASS	203108	0.347267	0.0001394	0.0385926	FBgn0003310	S	UPSTREAM	163
2L_1077988_SNP	1077988	C	C	G	PASS	21869	0.240418	PASS	165131	0.442568	2.42482e-05	0.0201844	FBgn0015905	ast	UTR_5_PRIME
2L_1077988_SNP	1077988	C	C	G	PASS	21869	0.240418	PASS	165131	0.442568	2.42482e-05	0.0201844	FBgn0003310	S	UPSTREAM	173
2L_10797835_SNP	10797835	C	C	T	PASS	238156	0.395939	PASS	183246	0.573427	8.807e-05	0.0324068	FBgn0051869	CG31869	INTRON
2L_10809460_SNP	10809460	G	G	A	PASS	202140	0.409357	PASS	124178	0.589404	0.00023211	0.0472318	FBgn0011676	Nos	INTRON
2L_10811576_SNP	10811576	G	G	C	PASS	28334	0.107256	PASS	25082	0.246988	0.00017321	0.0421987	FBgn0011676	Nos	INTRON
2L_10811608_SNP	10811608	T	T	G	PASS	23934	0.124542	PASS	21383	0.280405	0.00014009	0.0386696	FBgn0011676	Nos	INTRON
2L_10829207_SNP	10829207	C	C	T	PASS	29337	0.112121	PASS	24784	0.253776	0.00015552	0.0403739	FBgn0011676	Nos	INTRON
2L_10858990_SNP	10858990	G	C	G	PASS	21197	0.314935	PASS	138138	0.5	0.00019251	0.0440319	FBgn0027363	Stam	INTRON
2L_10858990_SNP	10858990	G	C	G	PASS	21197	0.314935	PASS	138138	0.5	0.00019251	0.0440319	FBgn0024227	ial	UPSTREAM	896
2L_10867636_SNP	10867636	T	C	T	PASS	21782	0.274247	PASS	169178	0.512968	5.8052e-07	0.00462332	Intergenic	Intergenic
2L_10867638_SNP	10867638	T	C	T	PASS	21880	0.268456	PASS	172175	0.504323	7.36686e-07	0.00486302	Intergenic	Intergenic
2L_10867760_SNP	10867760	C	C	T	PASS	242103	0.298551	PASS	211183	0.464467	0.00026501	0.0497868	Intergenic	Intergenic
2L_10875327_SNP	10875327	G	C	G	PASS	22629	0.113725	PASS	19473	0.273408	0.00011643	0.0361117	Intergenic	Intergenic
2L_10875968_SNP	10875968	A	A	C	PASS	142191	0.573574	PASS	233148	0.388451	9.07713e-05	0.0327301	Intergenic	Intergenic
2L_10875989_SNP	10875989	C	C	T	PASS	128180	0.584416	PASS	204136	0.4	0.0001566	0.0404679	Intergenic	Intergenic
2L_1088458_SNP	1088458	G	G	A	PASS	31122	0.0660661	PASS	28163	0.18314	0.00022688	0.0468901	FBgn0031299	CG4629	INTRON
2L_10887948_SNP	10887948	C	C	A	PASS	171162	0.486486	PASS	250104	0.293785	3.66778e-05	0.0232727	FBgn0032312	CG14071	DOWNSTREAM	321
2L_10887948_SNP	10887948	C	C	A	PASS	171162	0.486486	PASS	250104	0.293785	3.66778e-05	0.0232727	FBgn0265683	CR44490	DOWNSTREAM	749
2L_10889246_SNP	10889246	A	A	C	PASS	228113	0.331378	PASS	163177	0.520588	6.671e-05	0.0291737	FBgn0032312	CG14071	UPSTREAM	319
2L_10895088_SNP	10895088	T	C	T	PASS	199180	0.474934	PASS	264116	0.305263	0.00017669	0.0425344	FBgn0265684	CR44491	EXON
2L_10921549_SNP	10921549	T	C	T	PASS	224137	0.379501	PASS	152207	0.576602	2.84975e-05	0.0214422	FBgn0261871	dpr2	INTRON
2L_10922770_SNP	10922770	C	C	G	PASS	228102	0.309091	PASS	25643	0.143813	6.1262e-05	0.0282719	FBgn0261871	dpr2	INTRON
2L_10939238_SNP	10939238	T	T	C	PASS	136145	0.516014	PASS	217104	0.323988	0.00010056	0.0340685	FBgn0261871	dpr2	INTRON
2L_1095468_SNP	1095468	C	C	T	PASS	27615	0.0515464	PASS	27554	0.164134	0.00024745	0.048414	FBgn0031299	CG4629	INTRON
2L_10957497_SNP	10957497	A	C	A	PASS	12698	0.4375	PASS	15247	0.236181	0.00016883	0.0418074	FBgn0261871	dpr2	INTRON
2L_10959193_SNP	10959193	C	C	T	PASS	28683	0.224932	PASS	237163	0.4075	2.15935e-05	0.0191933	FBgn0261871	dpr2	INTRON
2L_10959194_SNP	10959194	A	A	G	PASS	28083	0.22865	PASS	237160	0.403023	5.26958e-05	0.0269009	FBgn0261871	dpr2	INTRON
2L_10964030_SNP	10964030	G	G	A	PASS	24731	0.111511	PASS	22578	0.257426	0.00019976	0.0446928	FBgn0261871	dpr2	START_GAINED
2L_10964030_SNP	10964030	G	G	A	PASS	24731	0.111511	PASS	22578	0.257426	0.00019976	0.0446928	FBgn0053129	CG33129	DOWNSTREAM	875
2L_10975426_SNP	10975426	A	A	G	PASS	143181	0.558642	PASS	204118	0.36646	7.83663e-05	0.0310155	FBgn0010612	l_2_06225	DOWNSTREAM	96
2L_10975426_SNP	10975426	A	A	G	PASS	143181	0.558642	PASS	204118	0.36646	7.83663e-05	0.0310155	FBgn0000018	abo	UPSTREAM	133
2L_10975461_SNP	10975461	A	A	T	PASS	139176	0.55873	PASS	206115	0.358255	4.1067e-05	0.0241712	FBgn0010612	l_2_06225	DOWNSTREAM	61
2L_10975461_SNP	10975461	A	A	T	PASS	139176	0.55873	PASS	206115	0.358255	4.1067e-05	0.0241712	FBgn0000018	abo	UPSTREAM	168
2L_10975653_SNP	10975653	T	T	A	PASS	200107	0.348534	PASS	136173	0.559871	1.854e-05	0.0181426	FBgn0010612	l_2_06225	DOWNSTREAM	125
2L_10975653_SNP	10975653	T	T	A	PASS	200107	0.348534	PASS	136173	0.559871	1.854e-05	0.0181426	FBgn0000018	abo	UPSTREAM	36
2L_10986780_SNP	10986780	T	T	C	PASS	158154	0.49359	PASS	240107	0.308357	9.85768e-05	0.0337664	FBgn0004872	piwi	INTRON
2L_10996803_SNP	10996803	G	G	A	PASS	34264	0.157635	PASS	252124	0.329787	1.297e-05	0.0157662	FBgn0026147	CG16833	DOWNSTREAM	262
2L_10996839_SNP	10996839	G	G	A	PASS	32557	0.149215	PASS	260107	0.291553	0.00022721	0.0469086	FBgn0026147	CG16833	DOWNSTREAM	298
2L_10996839_SNP	10996839	G	G	A	PASS	32557	0.149215	PASS	260107	0.291553	0.00022721	0.0469086	FBgn0000146	aub	DOWNSTREAM	98
2L_1101229_SNP	1101229	T	T	A	AF	35417	0.0458221	PASS	30258	0.161111	5.49085e-05	0.0272187	FBgn0031299	CG4629	INTRON
2L_1108458_SNP	1108458	T	T	G	PASS	173125	0.419463	PASS	22472	0.243243	0.00019055	0.0437579	FBgn0031301	CG14339	UPSTREAM	82
2L_1108458_SNP	1108458	T	T	G	PASS	173125	0.419463	PASS	22472	0.243243	0.00019055	0.0437579	FBgn0261938	mtRNApol	UPSTREAM	85
2L_1111925_SNP	1111925	C	C	G	PASS	28428	0.0897436	PASS	22667	0.228669	0.00014101	0.0387701	FBgn0031301	CG14339	SYNONYMOUS_CODING
2L_1112096_SNP	1112096	G	G	A	PASS	23414	0.0564516	PASS	21157	0.212687	1.38655e-05	0.016185	FBgn0031301	CG14339	SYNONYMOUS_CODING
2L_1112096_SNP	1112096	G	G	A	PASS	23414	0.0564516	PASS	21157	0.212687	1.38655e-05	0.016185	FBgn0031302	CG14340	UPSTREAM	845
2L_11153783_SNP	11153783	T	T	A	PASS	30674	0.194737	PASS	268142	0.346341	0.00019712	0.0444351	FBgn0032350	CG6287	INTRON
2L_1119252_SNP	1119252	T	T	C	PASS	27465	0.19174	PASS	202123	0.378462	1.91178e-05	0.0183309	FBgn0016926	Pino	INTRON
2L_1119259_SNP	1119259	C	C	T	PASS	26569	0.206587	PASS	201122	0.377709	0.000106	0.0347483	FBgn0016926	Pino	INTRON
2L_1119531_SNP	1119531	C	C	A	PASS	31636	0.102273	PASS	25277	0.234043	0.00024213	0.0479607	FBgn0016926	Pino	INTRON
2L_11200749_SNP	11200749	C	C	A	PASS	19167	0.25969	PASS	24720	0.0749064	2.24361e-06	0.007827	FBgn0259822	Ca-beta	INTRON
2L_11210143_SNP	11210143	T	T	A	PASS	284110	0.279188	PASS	227185	0.449029	0.00010677	0.0348658	FBgn0264442	ab	UPSTREAM	535
2L_11210184_SNP	11210184	G	G	T	PASS	259119	0.314815	PASS	174217	0.554987	1.57482e-07	0.00280443	FBgn0264442	ab	UPSTREAM	494
2L_11210191_SNP	11210191	T	T	G	PASS	258120	0.31746	PASS	175220	0.556962	1.66103e-07	0.00283153	FBgn0264442	ab	UPSTREAM	487
2L_11210224_SNP	11210224	A	G	A	PASS	151197	0.566092	PASS	238149	0.385013	0.00011007	0.0351963	FBgn0264442	ab	UPSTREAM	454
2L_1121140_SNP	1121140	C	C	T	AF	27613	0.0449827	PASS	28051	0.154079	0.00023472	0.0474864	FBgn0016926	Pino	INTRON
2L_11238466_SNP	11238466	A	A	T	PASS	21073	0.257951	PASS	172134	0.437908	0.00017479	0.0423691	FBgn0264442	ab	INTRON
2L_1123920_SNP	1123920	G	G	A	AF	35616	0.0430108	PASS	33556	0.143223	0.00019676	0.0444131	FBgn0016926	Pino	INTRON
2L_11274496_SNP	11274496	A	A	G	PASS	28274	0.207865	PASS	240144	0.375	8.39982e-05	0.0318132	FBgn0040233	cana	NON_SYNONYMOUS_CODING
2L_11274500_SNP	11274500	T	T	C	PASS	28881	0.219512	PASS	231157	0.404639	1.683e-05	0.0175334	FBgn0040233	cana	SYNONYMOUS_CODING
2L_11274519_SNP	11274519	C	C	T	PASS	32191	0.220874	PASS	252154	0.37931	0.00013773	0.0383991	FBgn0040233	cana	SYNONYMOUS_CODING
2L_11274527_SNP	11274527	T	T	G	PASS	31786	0.213399	PASS	259152	0.36983	0.00015079	0.0398098	FBgn0040233	cana	SYNONYMOUS_CODING
2L_1130602_SNP	1130602	G	G	A	AF	23811	0.0441767	PASS	19652	0.209677	3.16064e-06	0.00923752	FBgn0031304	CG4552	SYNONYMOUS_CODING
2L_11334040_SNP	11334040	T	G	T	PASS	26864	0.192771	PASS	33826	0.0714286	0.00017113	0.0419997	Intergenic	Intergenic
2L_1133557_SNP	1133557	G	G	A	PASS	33721	0.0586592	PASS	24852	0.173333	0.00023151	0.0471777	FBgn0031305	Iris	NON_SYNONYMOUS_CODING
2L_1134332_SNP	1134332	A	A	T	PASS	28952	0.152493	PASS	220104	0.320988	4.15319e-05	0.024314	FBgn0031305	Iris	UPSTREAM	234
2L_1134332_SNP	1134332	A	A	T	PASS	28952	0.152493	PASS	220104	0.320988	4.15319e-05	0.024314	FBgn0031306	CG4577	UPSTREAM	361
2L_11358246_SNP	11358246	C	G	C	PASS	28061	0.178886	PASS	243140	0.365535	8.55336e-06	0.0133373	FBgn0000287	salr	UPSTREAM	627
2L_1136198_SNP	1136198	G	G	A	AF	26811	0.0394265	PASS	26846	0.146497	0.00024393	0.0480684	FBgn0031306	CG4577	INTRON
2L_1142376_SNP	1142376	C	C	T	AF	28213	0.0440678	PASS	25353	0.173203	3.30058e-05	0.0224258	FBgn0267281	CR45717	UPSTREAM	493
2L_1142376_SNP	1142376	C	C	T	AF	28213	0.0440678	PASS	25353	0.173203	3.30058e-05	0.0224258	FBgn0031307	MFS3	UPSTREAM	825
2L_1142379_SNP	1142379	C	C	T	AF	2879	0.0304054	PASS	26646	0.147436	3.64524e-05	0.0232219	FBgn0267281	CR45717	UPSTREAM	49
2L_1142379_SNP	1142379	C	C	T	AF	2879	0.0304054	PASS	26646	0.147436	3.64524e-05	0.0232219	FBgn0031307	MFS3	UPSTREAM	822
2L_1144440_SNP	1144440	C	C	A	PASS	37821	0.0526316	PASS	36974	0.167043	4.7766e-05	0.0259435	FBgn0031307	MFS3	INTRON
2L_11495767_SNP	11495767	C	A	C	PASS	22746	0.168498	PASS	211103	0.328025	0.00025247	0.0487975	Intergenic	Intergenic
2L_1150596_SNP	1150596	A	A	T	PASS	123151	0.551095	PASS	200112	0.358974	0.00013223	0.0377809	FBgn0031309	Tfb4	INTRON
2L_1150596_SNP	1150596	A	A	T	PASS	123151	0.551095	PASS	200112	0.358974	0.00013223	0.0377809	FBgn0031310	Vps29	UPSTREAM	17
2L_11506977_SNP	11506977	G	G	A	PASS	19086	0.311594	PASS	25646	0.152318	0.00019604	0.0444131	FBgn0032362	spz4	SYNONYMOUS_CODING
2L_11527808_SNP	11527808	G	G	C	PASS	30042	0.122807	PASS	26394	0.263305	0.00018396	0.0431707	FBgn0028490	CG31705	INTRON
2L_11532317_SNP	11532317	A	A	G	PASS	233119	0.338068	PASS	30863	0.169811	4.05079e-05	0.0240717	FBgn0085191	CG34162	SYNONYMOUS_CODING
2L_11532317_SNP	11532317	A	A	G	PASS	233119	0.338068	PASS	30863	0.169811	4.05079e-05	0.0240717	FBgn0261707	CR42743	DOWNSTREAM	59
2L_11532340_SNP	11532340	G	G	T	PASS	238122	0.338889	PASS	30967	0.178191	8.88872e-05	0.0325051	FBgn0085191	CG34162	NON_SYNONYMOUS_CODING
2L_11532340_SNP	11532340	G	G	T	PASS	238122	0.338889	PASS	30967	0.178191	8.88872e-05	0.0325051	FBgn0261707	CR42743	DOWNSTREAM	486
2L_11533832_SNP	11533832	C	C	T	PASS	157146	0.481848	PASS	258104	0.287293	3.69689e-05	0.0233473	FBgn0261707	CR42743	INTRON
2L_11533832_SNP	11533832	C	C	T	PASS	157146	0.481848	PASS	258104	0.287293	3.69689e-05	0.0233473	FBgn0085191	CG34162	DOWNSTREAM	76
2L_11548816_SNP	11548816	T	T	A	PASS	140194	0.580838	PASS	185120	0.393443	0.00013063	0.0376665	FBgn0265687	CR44494	EXON
2L_11563680_SNP	11563680	G	G	A	PASS	8820	0.185185	PASS	7053	0.430894	0.00021813	0.0461157	Intergenic	Intergenic
2L_11579037_SNP	11579037	T	T	C	PASS	263111	0.296791	PASS	32459	0.154047	0.00023341	0.047371	Intergenic	Intergenic
2L_11618675_SNP	11618675	C	C	G	PASS	202100	0.331126	PASS	32642	0.11413	7.01014e-08	0.00214477	FBgn0015400	kek2	INTRON
2L_1162125_SNP	1162125	A	A	C	PASS	25655	0.176849	PASS	18096	0.347826	0.00011635	0.0361117	FBgn0031313	CG5080	SYNONYMOUS_CODING
2L_1162233_SNP	1162233	C	C	T	PASS	23220	0.0793651	PASS	19756	0.221344	0.00018078	0.0428534	FBgn0031313	CG5080	INTRON
2L_11642828_SNP	11642828	G	G	A	PASS	17590	0.339623	PASS	26850	0.157233	3.06089e-05	0.0216963	Intergenic	Intergenic
2L_11648277_SNP	11648277	A	G	A	PASS	23778	0.247619	PASS	217156	0.418231	0.0001589	0.0407217	FBgn0032369	CG6614	NON_SYNONYMOUS_CODING
2L_11667934_SNP	11667934	C	C	G	PASS	22684	0.270968	PASS	29840	0.118343	7.77462e-05	0.0309284	Intergenic	Intergenic
2L_11674078_SNP	11674078	A	G	A	PASS	24119	0.0730769	AF	2980	0	0.00014788	0.0395246	Intergenic	Intergenic
2L_11699693_SNP	11699693	T	T	G	PASS	34820	0.0543478	PASS	38672	0.157205	0.00022816	0.0469215	Intergenic	Intergenic
2L_11788593_SNP	11788593	A	A	G	PASS	26885	0.240793	PASS	223154	0.408488	0.00013689	0.0383112	FBgn0032374	CG14931	INTRON
2L_11823469_SNP	11823469	G	G	A	PASS	21268	0.242857	PASS	27430	0.0986842	0.0001479	0.0395246	FBgn0264815	Pde1c	INTRON
2L_11837794_SNP	11837794	T	T	C	PASS	37537	0.0898058	PASS	32085	0.209877	0.00020861	0.0453965	FBgn0259963	Sfp33A2	SYNONYMOUS_CODING
2L_11837794_SNP	11837794	T	T	C	PASS	37537	0.0898058	PASS	32085	0.209877	0.00020861	0.0453965	FBgn0264815	Pde1c	INTRON
2L_11837794_SNP	11837794	T	T	C	PASS	37537	0.0898058	PASS	32085	0.209877	0.00020861	0.0453965	FBgn0265349	Sfp33A4	DOWNSTREAM	38
2L_11837794_SNP	11837794	T	T	C	PASS	37537	0.0898058	PASS	32085	0.209877	0.00020861	0.0453965	FBgn0266366	CR45014	UPSTREAM	986
2L_11845544_SNP	11845544	C	C	T	PASS	240100	0.294118	PASS	31649	0.134247	4.05313e-05	0.0240717	FBgn0264815	Pde1c	INTRON
2L_11856241_SNP	11856241	G	G	A	PASS	188146	0.437126	PASS	303106	0.259169	6.65135e-05	0.0291458	FBgn0264815	Pde1c	INTRON
2L_11858034_SNP	11858034	A	A	T	PASS	209120	0.364742	PASS	24655	0.182724	3.384e-05	0.0227106	FBgn0264815	Pde1c	INTRON
2L_11860292_SNP	11860292	C	C	A	PASS	164208	0.55914	PASS	259167	0.392019	0.00025418	0.0488878	FBgn0264815	Pde1c	INTRON
2L_11861194_SNP	11861194	G	G	T	PASS	128184	0.589744	PASS	199124	0.383901	2.72045e-05	0.0211274	FBgn0264815	Pde1c	INTRON
2L_11862551_SNP	11862551	G	G	A	PASS	202161	0.443526	PASS	24786	0.258258	4.67285e-05	0.0256754	FBgn0264815	Pde1c	INTRON
2L_11868539_SNP	11868539	T	T	A	PASS	238125	0.344353	PASS	28955	0.159884	7.49219e-06	0.0127305	FBgn0264815	Pde1c	INTRON
2L_11868558_SNP	11868558	G	G	T	PASS	278124	0.308458	PASS	31758	0.154667	7.57948e-05	0.0306356	FBgn0264815	Pde1c	INTRON
2L_11875110_SNP	11875110	T	C	T	PASS	29973	0.196237	PASS	250133	0.347258	0.00025835	0.0491816	FBgn0264815	Pde1c	INTRON
2L_11877056_SNP	11877056	A	A	T	PASS	227102	0.31003	PASS	33051	0.133858	7.84422e-06	0.0130032	FBgn0264815	Pde1c	INTRON
2L_11877064_SNP	11877064	C	C	A	PASS	22595	0.296875	PASS	32754	0.141732	8.34863e-05	0.0317423	FBgn0264815	Pde1c	INTRON
2L_11879085_SNP	11879085	T	G	T	PASS	175168	0.489796	PASS	26993	0.256906	3.93445e-07	0.00415336	FBgn0264815	Pde1c	INTRON
2L_11880159_SNP	11880159	A	G	A	PASS	149201	0.574286	PASS	251170	0.4038	0.0002287	0.0469876	FBgn0264815	Pde1c	INTRON
2L_1188118_SNP	1188118	C	C	A	PASS	37826	0.0643564	PASS	33776	0.184019	6.34472e-05	0.0286699	FBgn0031322	CG5001	INTRON
2L_1188137_SNP	1188137	C	C	T	PASS	36833	0.0822943	PASS	32883	0.201946	0.000163	0.0411833	FBgn0031322	CG5001	INTRON
2L_1188138_SNP	1188138	A	A	T	PASS	37632	0.0784314	PASS	33584	0.200477	9.71979e-05	0.0336809	FBgn0031322	CG5001	INTRON
2L_11890507_SNP	11890507	C	C	A	PASS	173156	0.474164	PASS	25198	0.280802	3.324e-05	0.0225252	FBgn0264815	Pde1c	INTRON
2L_11903881_SNP	11903881	A	A	C	PASS	24495	0.280236	PASS	36749	0.117788	1.26887e-05	0.0157221	FBgn0264815	Pde1c	INTRON
2L_11917520_SNP	11917520	G	C	G	PASS	286144	0.334884	PASS	33575	0.182927	0.00011572	0.0360514	FBgn0264815	Pde1c	INTRON
2L_11948645_SNP	11948645	A	G	A	PASS	150205	0.577465	PASS	262147	0.359413	2.43704e-06	0.00813135	FBgn0032385	CG16964	DOWNSTREAM	22
2L_11948672_SNP	11948672	C	A	C	PASS	148202	0.577143	PASS	243137	0.360526	3.81e-06	0.00979002	FBgn0032385	CG16964	DOWNSTREAM	49
2L_11948704_SNP	11948704	C	C	A	PASS	209126	0.376119	PASS	29778	0.208	9.5985e-05	0.0335489	FBgn0032385	CG16964	DOWNSTREAM	81
2L_1195304_SNP	1195304	G	G	A	AF	37419	0.0483461	PASS	35468	0.161137	4.99563e-05	0.0263727	FBgn0031322	CG5001	INTRON
2L_11985571_SNP	11985571	C	C	G	PASS	31427	0.0791789	AF	3130	0	2.98346e-05	0.0215772	FBgn0032388	CG6686	NON_SYNONYMOUS_CODING
2L_1200528_SNP	1200528	G	G	T	PASS	34225	0.0681199	PASS	30369	0.185484	0.00016233	0.0411205	FBgn0263081	CG43349	UTR_3_PRIME
2L_1200528_SNP	1200528	G	G	T	PASS	34225	0.0681199	PASS	30369	0.185484	0.00016233	0.0411205	FBgn0040723	CG5011	UPSTREAM	143
2L_1200528_SNP	1200528	G	G	T	PASS	34225	0.0681199	PASS	30369	0.185484	0.00016233	0.0411205	FBgn0263080	CG43348	DOWNSTREAM	64
2L_1200530_SNP	1200530	C	G	C	PASS	33138	0.102981	PASS	28688	0.235294	0.00015661	0.0404679	FBgn0263081	CG43349	UTR_3_PRIME
2L_1200530_SNP	1200530	C	G	C	PASS	33138	0.102981	PASS	28688	0.235294	0.00015661	0.0404679	FBgn0040723	CG5011	UPSTREAM	141
2L_1200530_SNP	1200530	C	G	C	PASS	33138	0.102981	PASS	28688	0.235294	0.00015661	0.0404679	FBgn0263080	CG43348	DOWNSTREAM	66
2L_1203999_SNP	1203999	T	T	G	PASS	16912	0.0662983	PASS	16853	0.239819	3.10014e-05	0.0217989	FBgn0031324	CG14342	UPSTREAM	216
2L_12138214_SNP	12138214	C	C	T	PASS	248101	0.289398	PASS	30951	0.141667	0.00014939	0.0396584	FBgn0032416	Gr33a	SYNONYMOUS_CODING
2L_12143538_SNP	12143538	G	G	T	PASS	296113	0.276284	PASS	36454	0.129187	5.17213e-05	0.0267367	FBgn0051760	CG31760	INTRON
2L_12143800_SNP	12143800	C	C	T	PASS	25299	0.282051	PASS	33453	0.136951	0.00014	0.0386528	FBgn0051760	CG31760	INTRON
2L_1216432_SNP	1216432	G	G	A	PASS	26318	0.0640569	PASS	24256	0.187919	0.0002267	0.0468815	FBgn0262944	CR43263	DOWNSTREAM	422
2L_1216460_SNP	1216460	A	A	G	PASS	24619	0.0716981	PASS	25668	0.209877	8.318e-05	0.0316936	FBgn0262944	CR43263	DOWNSTREAM	394
2L_12174942_SNP	12174942	A	A	T	PASS	283106	0.272494	PASS	40650	0.109649	4.16093e-06	0.0099799	FBgn0000114	aret	UPSTREAM	62
2L_12174942_SNP	12174942	A	A	T	PASS	283106	0.272494	PASS	40650	0.109649	4.16093e-06	0.0099799	FBgn0263088	CR43356	UPSTREAM	34
2L_12174942_SNP	12174942	A	A	T	PASS	283106	0.272494	PASS	40650	0.109649	4.16093e-06	0.0099799	FBgn0032422	atilla	DOWNSTREAM	59
2L_12174942_SNP	12174942	A	A	T	PASS	283106	0.272494	PASS	40650	0.109649	4.16093e-06	0.0099799	FBgn0032421	crok	DOWNSTREAM	851
2L_12199343_SNP	12199343	A	A	G	PASS	23073	0.240924	PASS	28326	0.0841424	1.89055e-05	0.0182672	FBgn0000114	aret	INTRON
2L_12204925_SNP	12204925	G	G	A	PASS	140193	0.57958	PASS	226153	0.403694	0.00020425	0.045074	FBgn0000114	aret	INTRON
2L_12204934_SNP	12204934	G	G	T	PASS	138197	0.58806	PASS	226151	0.400531	7.49117e-05	0.0305204	FBgn0000114	aret	INTRON
2L_12239041_SNP	12239041	T	A	T	PASS	32537	0.10221	AF	3350	0	1.11215e-06	0.00583303	FBgn0000114	aret	INTRON
2L_12239045_SNP	12239045	A	T	A	PASS	30258	0.161111	AF	30913	0.0403727	2.9356e-05	0.0215241	FBgn0000114	aret	INTRON
2L_12239048_SNP	12239048	G	A	G	PASS	31940	0.111421	AF	3250	0	4.06614e-07	0.0041872	FBgn0000114	aret	INTRON
2L_12241985_SNP	12241985	T	C	T	PASS	151200	0.569801	PASS	229139	0.377717	4.54565e-05	0.0253036	FBgn0000114	aret	INTRON
2L_12241994_SNP	12241994	G	A	G	PASS	147212	0.590529	PASS	228140	0.380435	7.75205e-06	0.0129608	FBgn0000114	aret	INTRON
2L_12241995_SNP	12241995	T	C	T	PASS	150214	0.587912	PASS	230136	0.371585	3.97772e-06	0.00986533	FBgn0000114	aret	INTRON
2L_12278177_SNP	12278177	A	A	T	PASS	19176	0.284644	PASS	29245	0.133531	0.00020935	0.0454009	FBgn0000114	aret	INTRON
2L_12286891_SNP	12286891	T	T	C	PASS	33435	0.094851	PASS	30084	0.21875	0.00024808	0.0484587	FBgn0000114	aret	INTRON
2L_12292038_SNP	12292038	T	A	T	PASS	31267	0.176781	PASS	35222	0.0588235	8.31275e-05	0.0316936	FBgn0000114	aret	INTRON
2L_12292092_SNP	12292092	T	C	T	PASS	25631	0.108014	AF	2880	0	2.46599e-06	0.00815135	FBgn0000114	aret	INTRON
2L_12292098_SNP	12292098	C	G	C	PASS	25131	0.109929	AF	2840	0	2.25029e-06	0.00783247	FBgn0000114	aret	INTRON
2L_12292099_SNP	12292099	T	C	T	PASS	25830	0.104167	AF	2950	0	3.43497e-06	0.00946896	FBgn0000114	aret	INTRON
2L_1232136_SNP	1232136	G	G	A	AF	2449	0.0355731	PASS	26948	0.15142	9.84426e-05	0.0337652	Intergenic	Intergenic
2L_1232900_SNP	1232900	G	G	A	PASS	27725	0.0827815	PASS	27381	0.228814	3.50464e-05	0.022945	Intergenic	Intergenic
2L_1243383_SNP	1243383	G	G	A	PASS	25097	0.279539	PASS	31141	0.116477	1.709e-05	0.0176695	FBgn0031327	CG5397	DOWNSTREAM	365
2L_1247035_SNP	1247035	T	T	G	PASS	34821	0.0569106	PASS	30059	0.164345	0.00026721	0.0499756	Intergenic	Intergenic
2L_1247157_SNP	1247157	A	A	G	AF	32111	0.0331325	PASS	31346	0.128134	0.00026071	0.0493853	Intergenic	Intergenic
2L_12498403_SNP	12498403	A	A	G	PASS	27026	0.0878378	AF	3220	0	1.51664e-05	0.0167936	FBgn0259176	bun	INTRON
2L_12545015_SNP	12545015	A	A	T	PASS	195207	0.514925	PASS	272134	0.330049	3.919e-05	0.0237888	FBgn0259176	bun	INTRON
2L_12545015_SNP	12545015	A	A	T	PASS	195207	0.514925	PASS	272134	0.330049	3.919e-05	0.0237888	FBgn0261709	CR42746	DOWNSTREAM	672
2L_12556314_SNP	12556314	T	C	T	PASS	25728	0.0982456	AF	2850	0	7.89254e-06	0.0130032	Intergenic	Intergenic
2L_1256115_SNP	1256115	C	C	A	PASS	29123	0.0732484	PASS	28769	0.19382	0.00024226	0.0479607	FBgn0041097	robo3	UPSTREAM	32
2L_12575828_SNP	12575828	T	C	T	PASS	3027	0.473684	PASS	498	0.140351	0.00022708	0.0469067	Intergenic	Intergenic
2L_12576645_SNP	12576645	G	G	A	PASS	20973	0.258865	PASS	29938	0.11276	0.00015342	0.0401636	Intergenic	Intergenic
2L_12609558_SNP	12609558	G	G	T	PASS	20364	0.2397	PASS	132100	0.431034	0.00014616	0.039423	FBgn0085424	nub	INTRON
2L_12609558_SNP	12609558	G	G	T	PASS	20364	0.2397	PASS	132100	0.431034	0.00014616	0.039423	FBgn0032439	Ref2	DOWNSTREAM	959
2L_12643559_SNP	12643559	A	A	G	PASS	28576	0.210526	PASS	39924	0.0567376	9.02425e-07	0.00536404	FBgn0032439	Ref2	INTRON
2L_12643599_SNP	12643599	A	A	C	PASS	29483	0.220159	PASS	38337	0.0880952	6.37079e-05	0.0287156	FBgn0032439	Ref2	INTRON
2L_12650577_SNP	12650577	G	G	C	PASS	25790	0.259366	PASS	37052	0.123223	0.00018712	0.0434455	Intergenic	Intergenic
2L_12650587_SNP	12650587	G	G	A	PASS	25086	0.255952	PASS	37146	0.110312	5.45342e-05	0.0272062	Intergenic	Intergenic
2L_12650929_SNP	12650929	T	T	A	PASS	25067	0.211356	PASS	31023	0.0690691	2.5933e-05	0.0206531	Intergenic	Intergenic
2L_12650931_SNP	12650931	T	T	A	PASS	25263	0.2	PASS	31823	0.0674487	6.11733e-05	0.0282527	Intergenic	Intergenic
2L_12650932_SNP	12650932	A	A	T	PASS	25160	0.192926	PASS	31821	0.0619469	5.573e-05	0.0273186	Intergenic	Intergenic
2L_12650941_SNP	12650941	T	A	T	PASS	25269	0.214953	PASS	30922	0.0664653	1.14269e-05	0.0148558	Intergenic	Intergenic
2L_12650957_SNP	12650957	C	C	T	PASS	27059	0.179331	PASS	31518	0.054054	5.58118e-05	0.0273186	Intergenic	Intergenic
2L_12650988_SNP	12650988	T	T	C	PASS	24578	0.241486	PASS	31030	0.0882353	1.9846e-05	0.0186236	Intergenic	Intergenic
2L_12656756_SNP	12656756	T	T	G	PASS	27897	0.258667	PASS	37353	0.124413	0.00018836	0.043542	FBgn0004394	pdm2	UPSTREAM	49
2L_12656770_SNP	12656770	G	G	T	PASS	261104	0.284932	PASS	35358	0.141119	0.00013991	0.0386501	FBgn0004394	pdm2	UPSTREAM	395
2L_12657025_SNP	12657025	T	T	A	PASS	31068	0.179894	PASS	36924	0.0610687	7.69e-05	0.0308392	FBgn0004394	pdm2	UPSTREAM	14
2L_12657774_SNP	12657774	C	C	T	PASS	28588	0.235925	PASS	38347	0.109302	0.00024357	0.0480445	FBgn0004394	pdm2	UPSTREAM	5
2L_12667439_SNP	12667439	G	G	A	PASS	219129	0.37069	PASS	31080	0.205128	9.4512e-05	0.0333437	FBgn0004394	pdm2	INTRON
2L_12667439_SNP	12667439	G	G	A	PASS	219129	0.37069	PASS	31080	0.205128	9.4512e-05	0.0333437	FBgn0032442	CG15485	SYNONYMOUS_CODING
2L_12667763_SNP	12667763	G	G	A	PASS	207148	0.416901	PASS	26285	0.244957	0.00012057	0.0365226	FBgn0032442	CG15485	SYNONYMOUS_CODING
2L_12667763_SNP	12667763	G	G	A	PASS	207148	0.416901	PASS	26285	0.244957	0.00012057	0.0365226	FBgn0004394	pdm2	INTRON
2L_12668261_SNP	12668261	A	A	T	PASS	25384	0.249258	PASS	32239	0.108033	0.00010837	0.0350075	FBgn0004394	pdm2	INTRON
2L_12668261_SNP	12668261	A	A	T	PASS	25384	0.249258	PASS	32239	0.108033	0.00010837	0.0350075	FBgn0032442	CG15485	SYNONYMOUS_CODING
2L_12673778_SNP	12673778	C	C	T	PASS	198140	0.414201	PASS	26585	0.242857	0.00013674	0.0382795	FBgn0004394	pdm2	INTRON
2L_12689089_SNP	12689089	A	G	A	PASS	29016	0.0522876	PASS	27154	0.166154	0.00020666	0.0452344	Intergenic	Intergenic
2L_12691535_SNP	12691535	A	A	G	PASS	31645	0.124654	PASS	270101	0.272237	7.98273e-05	0.0312275	FBgn0032444	CG5525	INTRON
2L_12703554_SNP	12703554	T	T	C	PASS	25071	0.221184	PASS	31431	0.0898551	0.00017805	0.042646	FBgn0032450	CG5776	SYNONYMOUS_CODING
2L_12720515_SNP	12720515	C	T	C	PASS	28660	0.17341	PASS	32520	0.057971	0.00015757	0.0405444	FBgn0032455	CG5792	INTRON
2L_12720515_SNP	12720515	C	T	C	PASS	28660	0.17341	PASS	32520	0.057971	0.00015757	0.0405444	FBgn0032456	MRP	INTRON
2L_12721759_SNP	12721759	C	C	T	PASS	24258	0.193333	PASS	30422	0.0674847	0.00015198	0.0399924	FBgn0032455	CG5792	UTR_5_PRIME
2L_12721759_SNP	12721759	C	C	T	PASS	24258	0.193333	PASS	30422	0.0674847	0.00015198	0.0399924	FBgn0032456	MRP	INTRON
2L_12721923_SNP	12721923	G	G	A	PASS	26765	0.195783	PASS	32722	0.0630373	3.77529e-05	0.0234182	FBgn0032456	MRP	INTRON
2L_12721923_SNP	12721923	G	G	A	PASS	26765	0.195783	PASS	32722	0.0630373	3.77529e-05	0.0234182	FBgn0032455	CG5792	UPSTREAM	8
2L_12721985_SNP	12721985	G	G	A	PASS	223119	0.347953	PASS	150173	0.535604	9.33843e-05	0.0332182	FBgn0032456	MRP	INTRON
2L_12721985_SNP	12721985	G	G	A	PASS	223119	0.347953	PASS	150173	0.535604	9.33843e-05	0.0332182	FBgn0032455	CG5792	UPSTREAM	142
2L_12721998_SNP	12721998	A	A	T	PASS	243146	0.375321	PASS	164203	0.553134	0.00012393	0.0368676	FBgn0032456	MRP	INTRON
2L_12721998_SNP	12721998	A	A	T	PASS	243146	0.375321	PASS	164203	0.553134	0.00012393	0.0368676	FBgn0032455	CG5792	UPSTREAM	155
2L_12722004_SNP	12722004	A	A	C	PASS	247139	0.360104	PASS	160190	0.542857	8.892e-05	0.0325051	FBgn0032456	MRP	INTRON
2L_12722004_SNP	12722004	A	A	C	PASS	247139	0.360104	PASS	160190	0.542857	8.892e-05	0.0325051	FBgn0032455	CG5792	UPSTREAM	161
2L_12722164_SNP	12722164	A	A	T	PASS	25886	0.25	PASS	32237	0.103064	4.98176e-05	0.026354	FBgn0032456	MRP	INTRON
2L_12722164_SNP	12722164	A	A	T	PASS	25886	0.25	PASS	32237	0.103064	4.98176e-05	0.026354	FBgn0032455	CG5792	UPSTREAM	321
2L_12722216_SNP	12722216	G	G	T	PASS	28681	0.220708	PASS	36335	0.0879397	7.19317e-05	0.0300968	FBgn0032456	MRP	INTRON
2L_12722216_SNP	12722216	G	G	T	PASS	28681	0.220708	PASS	36335	0.0879397	7.19317e-05	0.0300968	FBgn0032455	CG5792	UPSTREAM	373
2L_1272486_SNP	1272486	C	C	A	AF	40313	0.03125	PASS	35954	0.130751	5.40081e-05	0.0271011	FBgn0041097	robo3	INTRON
2L_1272488_SNP	1272488	T	T	G	AF	40113	0.031401	PASS	36354	0.129496	6.447e-05	0.0288871	FBgn0041097	robo3	INTRON
2L_1272499_SNP	1272499	C	C	T	AF	42014	0.0322581	PASS	37054	0.127358	8.69121e-05	0.0322329	FBgn0041097	robo3	INTRON
2L_1272502_SNP	1272502	T	T	C	AF	42315	0.0342466	PASS	36856	0.132075	7.26852e-05	0.030128	FBgn0041097	robo3	INTRON
2L_1272514_SNP	1272514	C	C	T	AF	41911	0.0255814	PASS	37149	0.116667	7.74426e-05	0.0308859	FBgn0041097	robo3	INTRON
2L_1272515_SNP	1272515	T	T	C	AF	41911	0.0255814	PASS	37047	0.11271	0.00013022	0.0376292	FBgn0041097	robo3	INTRON
2L_1272518_SNP	1272518	T	T	C	AF	41711	0.0257009	PASS	37746	0.108747	0.00021556	0.0459291	FBgn0041097	robo3	INTRON
2L_12729449_SNP	12729449	T	T	A	PASS	259121	0.318421	PASS	33266	0.165829	0.00010936	0.0351162	FBgn0032456	MRP	INTRON
2L_12729821_SNP	12729821	A	A	T	PASS	30375	0.198413	PASS	39929	0.067757	2.46154e-05	0.0202326	FBgn0032456	MRP	INTRON
2L_1277133_SNP	1277133	A	A	G	PASS	33626	0.0718232	PASS	32087	0.213759	1.15044e-05	0.014906	FBgn0041097	robo3	INTRON
2L_12773473_SNP	12773473	T	T	A	AF	39319	0.0461165	PASS	34559	0.14604	0.00018678	0.0434072	Intergenic	Intergenic
2L_12773484_SNP	12773484	C	C	A	AF	40616	0.0379147	PASS	36456	0.133333	0.00014895	0.0396115	Intergenic	Intergenic
2L_1278843_SNP	1278843	C	C	T	AF	32213	0.038806	PASS	35062	0.150485	4.511e-05	0.0252513	FBgn0041097	robo3	INTRON
2L_12796142_SNP	12796142	C	C	A	PASS	29374	0.201635	PASS	33730	0.0817439	0.00024408	0.0480772	Intergenic	Intergenic
2L_1282989_SNP	1282989	A	A	C	PASS	24252	0.176871	PASS	239123	0.339779	0.00013396	0.0379571	FBgn0041097	robo3	INTRON
2L_12908766_SNP	12908766	C	C	T	PASS	188136	0.419753	PASS	30691	0.229219	1.67374e-05	0.0174969	Intergenic	Intergenic
2L_12908767_SNP	12908767	A	A	G	PASS	188136	0.419753	PASS	30791	0.228643	1.56012e-05	0.0170178	Intergenic	Intergenic
2L_12908775_SNP	12908775	T	T	C	PASS	200148	0.425287	PASS	30899	0.243243	3.38413e-05	0.0227106	Intergenic	Intergenic
2L_12976055_SNP	12976055	C	G	C	PASS	201119	0.371875	PASS	155188	0.548105	0.00026007	0.0493281	FBgn0263598	Vha68-2	INTRON
2L_12976063_SNP	12976063	G	A	G	PASS	201118	0.369906	PASS	149181	0.548485	0.00023606	0.047531	FBgn0263598	Vha68-2	INTRON
2L_12982724_SNP	12982724	T	G	T	PASS	21081	0.278351	PASS	27137	0.12013	7.561e-05	0.0306219	Intergenic	Intergenic
2L_12989562_SNP	12989562	G	G	A	PASS	29616	0.0512821	PASS	33763	0.1575	0.00025826	0.0491723	Intergenic	Intergenic
2L_13021736_SNP	13021736	A	A	C	AF	35813	0.0350404	PASS	37456	0.130233	0.00015521	0.0403404	FBgn0262160	CG9932	DOWNSTREAM	132
2L_13021736_SNP	13021736	A	A	C	AF	35813	0.0350404	PASS	37456	0.130233	0.00015521	0.0403404	FBgn0028965	A16	UPSTREAM	424
2L_13043015_SNP	13043015	C	C	T	PASS	185100	0.350877	PASS	153190	0.553936	3.62653e-05	0.0232152	FBgn0262160	CG9932	INTRON
2L_13045649_SNP	13045649	C	C	G	PASS	35262	0.149758	PASS	293122	0.293976	0.00012167	0.0366333	FBgn0262160	CG9932	INTRON
2L_13046286_SNP	13046286	G	G	A	PASS	153196	0.561605	PASS	228137	0.375342	7.87685e-05	0.0310749	FBgn0262160	CG9932	INTRON
2L_1306735_SNP	1306735	G	T	G	PASS	22279	0.262458	PASS	180153	0.459459	2.99732e-05	0.0215772	Intergenic	Intergenic
2L_13096369_SNP	13096369	G	G	A	PASS	29082	0.22043	PASS	33535	0.0945946	0.00021706	0.0460531	FBgn0267003	CR45447	UPSTREAM	625
2L_13104168_SNP	13104168	T	T	G	PASS	27989	0.241848	PASS	37845	0.106383	9.84927e-05	0.0337652	FBgn0267017	CR45461	UPSTREAM	512
2L_13131407_SNP	13131407	A	A	C	PASS	228136	0.373626	PASS	156189	0.547826	0.00022592	0.0468155	FBgn0032471	CG5122	NON_SYNONYMOUS_CODING
2L_13158104_SNP	13158104	A	A	G	PASS	220144	0.395604	PASS	25879	0.234421	0.00026443	0.0497194	FBgn0028410	Pk34A	UPSTREAM	76
2L_13158113_SNP	13158113	C	C	A	PASS	211146	0.408964	PASS	25081	0.244713	0.00025258	0.0487975	FBgn0028410	Pk34A	UPSTREAM	697
2L_13158114_SNP	13158114	A	A	C	PASS	210142	0.403409	PASS	25480	0.239521	0.00024752	0.048414	FBgn0028410	Pk34A	UPSTREAM	696
2L_13158124_SNP	13158124	G	G	C	PASS	227173	0.4325	PASS	26596	0.265928	0.00016519	0.04139	FBgn0028410	Pk34A	UPSTREAM	686
2L_13185655_SNP	13185655	A	A	C	PASS	25478	0.23494	PASS	29731	0.0945122	9.3852e-05	0.033233	FBgn0032479	CG16974	NON_SYNONYMOUS_CODING
2L_13185655_SNP	13185655	A	A	C	PASS	25478	0.23494	PASS	29731	0.0945122	9.3852e-05	0.033233	FBgn0032478	CG5458	DOWNSTREAM	78
2L_13226792_SNP	13226792	T	C	T	PASS	166241	0.592138	PASS	244167	0.406326	4.16652e-05	0.0243177	FBgn0032490	CG16813	UPSTREAM	737
2L_13256391_SNP	13256391	G	G	A	PASS	22394	0.29653	PASS	28949	0.14497	0.00017008	0.0419218	FBgn0051728	CG31728	SYNONYMOUS_CODING
2L_13261806_SNP	13261806	C	C	T	PASS	25866	0.203704	PASS	31021	0.0634441	2.203e-05	0.0192681	FBgn0264894	CG44085	INTRON
2L_13267602_SNP	13267602	T	T	A	PASS	29990	0.231362	PASS	35238	0.0974359	8.61322e-05	0.0321461	FBgn0264894	CG44085	INTRON
2L_13277900_SNP	13277900	C	C	T	PASS	247123	0.332432	PASS	185190	0.506667	0.00015389	0.0402597	FBgn0264894	CG44085	INTRON
2L_13309123_SNP	13309123	A	A	G	PASS	19216	0.0769231	PASS	17151	0.22973	0.00016231	0.0411205	FBgn0264308	CG43778	NON_SYNONYMOUS_CODING
2L_13331660_SNP	13331660	A	A	G	PASS	28644	0.133333	PASS	23791	0.277439	0.0002362	0.0475376	FBgn0264308	CG43778	UPSTREAM	539
2L_13336842_SNP	13336842	C	C	A	PASS	26272	0.215569	PASS	32632	0.0893855	0.00023742	0.0476554	Intergenic	Intergenic
2L_13414338_SNP	13414338	C	C	G	PASS	37182	0.181015	PASS	245127	0.341398	5.70575e-05	0.0275307	FBgn0032523	CG16956	SYNONYMOUS_CODING
2L_13414338_SNP	13414338	C	C	G	PASS	37182	0.181015	PASS	245127	0.341398	5.70575e-05	0.0275307	FBgn0032522	CG16848	DOWNSTREAM	622
2L_13416918_SNP	13416918	T	C	T	PASS	384172	0.309353	PASS	28355	0.162722	0.00012357	0.03681	FBgn0264432	CG43850	INTRON
2L_13416918_SNP	13416918	T	C	T	PASS	384172	0.309353	PASS	28355	0.162722	0.00012357	0.03681	FBgn0263354	CG42784	INTRON
2L_13416940_SNP	13416940	A	T	A	PASS	378172	0.312727	PASS	29859	0.165266	0.00010561	0.0347204	FBgn0264432	CG43850	INTRON
2L_13416940_SNP	13416940	A	T	A	PASS	378172	0.312727	PASS	29859	0.165266	0.00010561	0.0347204	FBgn0263354	CG42784	INTRON
2L_13416950_SNP	13416950	A	T	A	PASS	385175	0.3125	PASS	30965	0.173797	0.0002496	0.0486216	FBgn0263354	CG42784	INTRON
2L_13416950_SNP	13416950	A	T	A	PASS	385175	0.3125	PASS	30965	0.173797	0.0002496	0.0486216	FBgn0264432	CG43850	INTRON
2L_13420968_SNP	13420968	G	G	A	PASS	46144	0.0871287	PASS	29476	0.205405	0.00018523	0.0432704	FBgn0263354	CG42784	INTRON
2L_13420968_SNP	13420968	G	G	A	PASS	46144	0.0871287	PASS	29476	0.205405	0.00018523	0.0432704	FBgn0264432	CG43850	DOWNSTREAM	323
2L_13425789_SNP	13425789	G	A	G	PASS	250107	0.29972	PASS	31055	0.150685	0.00015222	0.0400267	FBgn0263354	CG42784	INTRON
2L_1344295_SNP	1344295	T	T	A	AF	32113	0.0389222	PASS	32457	0.149606	6.23857e-05	0.0285032	FBgn0026141	Cdlc2	UPSTREAM	15
2L_1344295_SNP	1344295	T	T	A	AF	32113	0.0389222	PASS	32457	0.149606	6.23857e-05	0.0285032	FBgn0053922	CG33922	UPSTREAM	124
2L_1344322_SNP	1344322	A	A	C	PASS	32218	0.0529412	PASS	31761	0.161376	0.00020579	0.0451917	FBgn0026141	Cdlc2	UPSTREAM	78
2L_1344322_SNP	1344322	A	A	C	PASS	32218	0.0529412	PASS	31761	0.161376	0.00020579	0.0451917	FBgn0053922	CG33922	UPSTREAM	151
2L_1344329_SNP	1344329	C	C	G	PASS	30518	0.0557276	PASS	30662	0.168478	0.00018639	0.0433695	FBgn0026141	Cdlc2	UPSTREAM	71
2L_1344329_SNP	1344329	C	C	G	PASS	30518	0.0557276	PASS	30662	0.168478	0.00018639	0.0433695	FBgn0053922	CG33922	UPSTREAM	158
2L_13459091_SNP	13459091	A	A	G	PASS	323104	0.24356	PASS	37749	0.115023	0.00018326	0.0430928	FBgn0263354	CG42784	INTRON
2L_13459091_SNP	13459091	A	A	G	PASS	323104	0.24356	PASS	37749	0.115023	0.00018326	0.0430928	FBgn0267244	CR45684	UPSTREAM	486
2L_13459091_SNP	13459091	A	A	G	PASS	323104	0.24356	PASS	37749	0.115023	0.00018326	0.0430928	FBgn0261992	CG42810	UPSTREAM	59
2L_1346120_SNP	1346120	C	C	T	AF	34710	0.0280112	PASS	31047	0.131653	5.22569e-05	0.0268576	FBgn0266358	CR45006	EXON
2L_1346120_SNP	1346120	C	C	T	AF	34710	0.0280112	PASS	31047	0.131653	5.22569e-05	0.0268576	FBgn0266357	CR45005	UPSTREAM	28
2L_1346120_SNP	1346120	C	C	T	AF	34710	0.0280112	PASS	31047	0.131653	5.22569e-05	0.0268576	FBgn0026141	Cdlc2	DOWNSTREAM	985
2L_13467507_SNP	13467507	G	G	A	PASS	175167	0.488304	PASS	24997	0.280347	7.8255e-06	0.0130032	FBgn0263354	CG42784	INTRON
2L_13467669_SNP	13467669	G	G	A	PASS	264115	0.30343	PASS	36351	0.123188	1.55236e-06	0.00683164	FBgn0263354	CG42784	INTRON
2L_13480366_SNP	13480366	G	G	A	PASS	181108	0.373702	PASS	28775	0.207182	0.00017517	0.0424018	FBgn0263354	CG42784	INTRON
2L_13518222_SNP	13518222	C	C	A	PASS	36552	0.1247	PASS	283119	0.29602	3.54141e-06	0.0095725	FBgn0023407	B4	INTRON
2L_13518236_SNP	13518236	C	C	G	PASS	36451	0.122892	PASS	270106	0.281915	1.57646e-05	0.017055	FBgn0023407	B4	INTRON
2L_13522126_SNP	13522126	A	A	C	PASS	12546	0.269006	PASS	5671	0.559055	6.51079e-06	0.0120976	FBgn0023407	B4	INTRON
2L_1354029_SNP	1354029	C	C	G	AF	33112	0.0349854	PASS	35755	0.133495	0.00014023	0.0386751	FBgn0031333	CG5561	UTR_5_PRIME
2L_1354029_SNP	1354029	C	C	G	AF	33112	0.0349854	PASS	35755	0.133495	0.00014023	0.0386751	FBgn0051924	CG31924	DOWNSTREAM	72
2L_1354029_SNP	1354029	C	C	G	AF	33112	0.0349854	PASS	35755	0.133495	0.00014023	0.0386751	FBgn0031335	CG5565	DOWNSTREAM	882
2L_1356463_SNP	1356463	G	G	A	PASS	25328	0.0996441	PASS	23774	0.237942	0.00024018	0.0477966	FBgn0031335	CG5565	UPSTREAM	539
2L_13607719_SNP	13607719	G	G	A	PASS	18764	0.25498	PASS	24228	0.103704	0.00017258	0.042134	FBgn0259984	kuz	INTRON
2L_13607725_SNP	13607725	A	A	G	PASS	19068	0.263566	PASS	25730	0.10453	7.23e-05	0.0301266	FBgn0259984	kuz	INTRON
2L_13624747_SNP	13624747	G	G	C	PASS	23068	0.228188	PASS	30732	0.0943953	0.00021125	0.0455844	FBgn0259984	kuz	INTRON
2L_1362789_SNP	1362789	G	A	G	PASS	153144	0.484848	PASS	22889	0.280757	2.34112e-05	0.019818	FBgn0053126	NLaz	UPSTREAM	968
2L_13635624_SNP	13635624	A	A	C	PASS	22170	0.24055	PASS	24126	0.0973783	0.00019454	0.0442442	FBgn0259984	kuz	INTRON
2L_1367191_SNP	1367191	C	C	T	PASS	25015	0.0566038	PASS	20747	0.185039	0.00017695	0.0425394	FBgn0031337	CG14346	UPSTREAM	85
2L_13682572_SNP	13682572	T	C	T	PASS	188198	0.512953	PASS	228119	0.342939	0.00025052	0.0487017	FBgn0051814	CG31814	INTRON
2L_13692621_SNP	13692621	T	T	A	PASS	198171	0.463415	PASS	287114	0.284289	6.151e-05	0.0283229	FBgn0051814	CG31814	INTRON
2L_13692634_SNP	13692634	A	A	T	PASS	192182	0.486631	PASS	288115	0.28536	7.21185e-06	0.0126321	FBgn0051814	CG31814	INTRON
2L_13692875_SNP	13692875	T	C	T	PASS	194123	0.388013	PASS	162224	0.580311	5.38063e-05	0.027076	FBgn0051814	CG31814	INTRON
2L_13710552_SNP	13710552	T	T	A	PASS	24489	0.267267	PASS	31645	0.124654	0.00016656	0.041509	FBgn0028848	CG7311	UTR_3_PRIME
2L_13710552_SNP	13710552	T	T	A	PASS	24489	0.267267	PASS	31645	0.124654	0.00016656	0.041509	FBgn0051814	CG31814	INTRON
2L_13713508_SNP	13713508	T	T	C	PASS	307118	0.277647	PASS	34957	0.140394	0.00018458	0.0432123	FBgn0051814	CG31814	INTRON
2L_13717769_SNP	13717769	C	C	T	AF	3840	0	PASS	36525	0.0641026	7.911e-05	0.0311773	FBgn0051814	CG31814	UPSTREAM	449
2L_13721561_SNP	13721561	G	G	A	PASS	14675	0.339367	PASS	23038	0.141791	1.75737e-05	0.0178018	FBgn0028847	CG9014	DOWNSTREAM	6
2L_13737143_SNP	13737143	T	T	A	PASS	191193	0.502604	PASS	280132	0.320388	5.15273e-05	0.0267367	FBgn0051813	CG31813	DOWNSTREAM	113
2L_13737146_SNP	13737146	A	A	C	PASS	186188	0.502674	PASS	268129	0.324937	9.29576e-05	0.0331315	FBgn0051813	CG31813	DOWNSTREAM	116
2L_13737147_SNP	13737147	G	G	A	PASS	181189	0.510811	PASS	266129	0.326582	5.47525e-05	0.0272062	FBgn0051813	CG31813	DOWNSTREAM	117
2L_13737184_SNP	13737184	C	C	G	PASS	161210	0.566038	PASS	258147	0.362963	1.00078e-05	0.0140613	FBgn0051813	CG31813	DOWNSTREAM	154
2L_13820917_SNP	13820917	A	C	A	PASS	29534	0.103343	PASS	28089	0.241192	0.00012793	0.0373977	FBgn0000153	b	UPSTREAM	331
2L_13868274_SNP	13868274	C	T	C	PASS	28292	0.245989	PASS	209146	0.411268	0.0001798	0.042837	FBgn0028509	CenG1A	INTRON
2L_1387056_SNP	1387056	C	C	T	PASS	186128	0.407643	PASS	28290	0.241935	0.00022609	0.0468189	FBgn0002543	lea	INTRON
2L_13876377_SNP	13876377	G	G	T	PASS	24093	0.279279	PASS	31049	0.13649	0.00022939	0.0470423	FBgn0028509	CenG1A	INTRON
2L_13909308_SNP	13909308	G	G	T	PASS	165236	0.588529	PASS	269186	0.408791	5.99961e-05	0.0279913	FBgn0032535	Ance-2	UPSTREAM	25
2L_13909308_SNP	13909308	G	G	T	PASS	165236	0.588529	PASS	269186	0.408791	5.99961e-05	0.0279913	FBgn0012037	Ance	DOWNSTREAM	96
2L_13990206_SNP	13990206	G	A	G	PASS	243113	0.317416	PASS	29952	0.148148	2.39963e-05	0.0200709	FBgn0003255	rk	INTRON
2L_13990209_SNP	13990209	T	A	T	PASS	207157	0.431319	PASS	26294	0.264045	0.00019505	0.0443176	FBgn0003255	rk	INTRON
2L_1399238_SNP	1399238	A	A	G	PASS	26750	0.157729	PASS	209102	0.327974	5.56686e-05	0.0273186	FBgn0002543	lea	INTRON
2L_13997719_SNP	13997719	A	A	T	AF	3820	0	PASS	37124	0.0607595	0.00012118	0.0365685	FBgn0003255	rk	INTRON
2L_1400002_SNP	1400002	A	A	C	PASS	821	0.724138	PASS	256	0.193548	5.76063e-05	0.0276388	FBgn0002543	lea	INTRON
2L_1400005_SNP	1400005	A	A	T	PASS	823	0.741935	PASS	266	0.1875	1.71e-05	0.0176695	FBgn0002543	lea	INTRON
2L_14053590_SNP	14053590	T	G	T	PASS	248102	0.291429	PASS	190176	0.480874	3.79971e-05	0.023466	FBgn0028875	nAChRalpha5	INTRON
2L_1407547_SNP	1407547	C	C	G	PASS	245101	0.291908	PASS	210178	0.458763	0.00023953	0.0477781	FBgn0002543	lea	INTRON
2L_14082086_SNP	14082086	T	T	A	PASS	226111	0.329377	PASS	34758	0.14321	2.87294e-06	0.00882289	FBgn0028875	nAChRalpha5	INTRON
2L_14119314_SNP	14119314	A	A	C	PASS	226103	0.31307	PASS	32460	0.15625	9.399e-05	0.0332654	Intergenic	Intergenic
2L_14151588_SNP	14151588	T	G	T	PASS	172114	0.398601	PASS	27974	0.209632	2.93014e-05	0.0215241	FBgn0028906	CG17341	INTRON
2L_14151617_SNP	14151617	T	C	T	PASS	197136	0.408408	PASS	30285	0.219638	1.65983e-05	0.0174572	FBgn0028906	CG17341	INTRON
2L_14163807_SNP	14163807	T	T	C	PASS	39725	0.0592417	PASS	34067	0.164619	0.00021558	0.0459291	FBgn0263038	CG43333	UTR_3_PRIME
2L_14163807_SNP	14163807	T	T	C	PASS	39725	0.0592417	PASS	34067	0.164619	0.00021558	0.0459291	FBgn0263037	CG43332	UPSTREAM	585
2L_14188503_SNP	14188503	G	G	C	PASS	25498	0.278409	PASS	30842	0.12	3.00056e-05	0.0215772	FBgn0016930	Dyrk2	INTRON
2L_14197542_SNP	14197542	T	T	C	PASS	223152	0.405333	PASS	33599	0.228111	2.908e-05	0.0215171	FBgn0016930	Dyrk2	INTRON
2L_1422407_SNP	1422407	A	A	T	PASS	26040	0.133333	PASS	232119	0.339031	6.88121e-07	0.0047313	Intergenic	Intergenic
2L_14236261_SNP	14236261	C	C	A	PASS	168127	0.430508	PASS	21769	0.241259	7.37981e-05	0.0302814	FBgn0265941	CR44728	EXON
2L_1425056_SNP	1425056	G	G	A	PASS	34225	0.0681199	PASS	28668	0.19209	9.236e-05	0.0330331	Intergenic	Intergenic
2L_14255223_SNP	14255223	T	T	C	PASS	189195	0.507812	PASS	288129	0.309353	9.77947e-06	0.0140144	Intergenic	Intergenic
2L_14260222_SNP	14260222	A	T	A	PASS	150166	0.525316	PASS	228123	0.350427	0.00026617	0.0499106	Intergenic	Intergenic
2L_14276243_SNP	14276243	T	T	A	PASS	267120	0.310078	PASS	27753	0.160606	0.00019535	0.0443217	FBgn0261563	wb	INTRON
2L_14276243_SNP	14276243	T	T	A	PASS	267120	0.310078	PASS	27753	0.160606	0.00019535	0.0443217	FBgn0052971	CG32971	INTRON
2L_14307853_SNP	14307853	G	G	T	PASS	295102	0.256927	PASS	37651	0.119438	0.00010193	0.0342001	FBgn0261563	wb	INTRON
2L_14315498_SNP	14315498	T	T	C	PASS	28385	0.230978	PASS	35341	0.104061	0.00024522	0.0481828	FBgn0261563	wb	INTRON
2L_14315528_SNP	14315528	T	T	C	PASS	27595	0.256757	PASS	35146	0.115869	9.148e-05	0.0328643	FBgn0261563	wb	INTRON
2L_14315532_SNP	14315532	A	A	T	PASS	28395	0.251323	PASS	35246	0.115578	0.00014116	0.0387983	FBgn0261563	wb	INTRON
2L_14315534_SNP	14315534	A	A	T	PASS	285100	0.25974	PASS	34648	0.121827	0.00013669	0.0382795	FBgn0261563	wb	INTRON
2L_14315714_SNP	14315714	A	A	T	PASS	24699	0.286957	PASS	35058	0.142157	0.00015348	0.0401741	FBgn0261563	wb	INTRON
2L_1433129_SNP	1433129	A	T	A	PASS	24993	0.27193	PASS	227179	0.440887	0.00015827	0.040658	FBgn0003926	snRNA:U3:22A	DOWNSTREAM	28
2L_1433215_SNP	1433215	A	G	A	PASS	32952	0.136483	PASS	290123	0.297821	1.91344e-05	0.0183309	FBgn0003926	snRNA:U3:22A	DOWNSTREAM	294
2L_14332817_SNP	14332817	A	A	G	PASS	32929	0.0810056	PASS	29776	0.203753	0.00018187	0.0429192	FBgn0261529	ms_2_34Fe	SYNONYMOUS_CODING
2L_14364139_SNP	14364139	T	C	T	PASS	18269	0.2749	PASS	24331	0.113139	9.37878e-05	0.0332267	FBgn0015546	spel1	SYNONYMOUS_CODING
2L_1437041_SNP	1437041	A	A	C	PASS	29031	0.0965732	PASS	27387	0.241667	5.58636e-05	0.0273186	Intergenic	Intergenic
2L_14394025_SNP	14394025	A	G	A	PASS	156200	0.561798	PASS	211133	0.386628	0.00022626	0.0468429	FBgn0004858	elB	INTRON
2L_14396850_SNP	14396850	C	C	A	PASS	266107	0.286863	PASS	33549	0.127604	2.31213e-05	0.0196966	FBgn0004858	elB	INTRON
2L_14435421_SNP	14435421	A	A	T	PASS	264198	0.428571	PASS	340116	0.254386	2.808e-05	0.0214344	Intergenic	Intergenic
2L_14445484_SNP	14445484	A	A	T	PASS	153171	0.527778	PASS	219119	0.352071	0.00025696	0.0490955	Intergenic	Intergenic
2L_14456104_SNP	14456104	G	G	A	PASS	207126	0.378378	PASS	31482	0.207071	6.34976e-05	0.0286699	Intergenic	Intergenic
2L_14515837_SNP	14515837	T	T	C	PASS	282104	0.26943	PASS	32746	0.123324	7.346e-05	0.0302225	Intergenic	Intergenic
2L_14515849_SNP	14515849	G	G	T	PASS	281101	0.264398	PASS	32546	0.123989	0.000135	0.0380685	Intergenic	Intergenic
2L_14544964_SNP	14544964	A	A	G	PASS	20399	0.327815	PASS	28757	0.165698	0.00011928	0.0363993	Intergenic	Intergenic
2L_14575697_SNP	14575697	G	G	A	PASS	27445	0.141066	PASS	220106	0.325153	8.24777e-06	0.0131232	FBgn0266150	CR44856	UPSTREAM	776
2L_14581494_SNP	14581494	C	T	C	PASS	203185	0.476804	PASS	294120	0.289855	2.50942e-05	0.0203448	Intergenic	Intergenic
2L_14614040_SNP	14614040	C	C	T	PASS	24252	0.176871	PASS	225118	0.344023	0.00010573	0.0347324	FBgn0003016	osp	INTRON
2L_14614040_SNP	14614040	C	C	T	PASS	24252	0.176871	PASS	225118	0.344023	0.00010573	0.0347324	FBgn0263330	CR43411	DOWNSTREAM	419
2L_14623361_SNP	14623361	A	A	G	PASS	25783	0.244118	PASS	34943	0.109694	0.00017696	0.0425394	FBgn0003016	osp	INTRON
2L_14640920_SNP	14640920	G	G	T	PASS	372131	0.260437	PASS	41362	0.130526	0.00014396	0.0391753	FBgn0003016	osp	INTRON
2L_14664462_SNP	14664462	C	C	T	PASS	23786	0.266254	PASS	30129	0.0878788	1.55148e-06	0.00683164	FBgn0003016	osp	INTRON
2L_14681837_SNP	14681837	G	G	T	PASS	276145	0.344418	PASS	33275	0.184275	5.85119e-05	0.0278133	FBgn0003016	osp	INTRON
2L_14681851_SNP	14681851	C	C	T	PASS	273121	0.307107	PASS	32160	0.15748	0.00012105	0.0365685	FBgn0003016	osp	INTRON
2L_14681852_SNP	14681852	G	G	T	PASS	274121	0.306329	PASS	32259	0.154856	9.50345e-05	0.033405	FBgn0003016	osp	INTRON
2L_14682805_SNP	14682805	C	C	A	PASS	163231	0.586294	PASS	228141	0.382114	1.03163e-05	0.0142208	FBgn0003016	osp	INTRON
2L_14702593_SNP	14702593	G	G	T	PASS	27188	0.245125	PASS	34642	0.108247	0.00011887	0.0363151	Intergenic	Intergenic
2L_14703021_SNP	14703021	T	T	A	PASS	153211	0.57967	PASS	241144	0.374026	9.8789e-06	0.0140144	Intergenic	Intergenic
2L_14703031_SNP	14703031	C	C	T	PASS	162211	0.565684	PASS	246154	0.385	8.81613e-05	0.0324094	Intergenic	Intergenic
2L_14717705_SNP	14717705	G	G	A	PASS	17572	0.291498	PASS	25437	0.127148	0.00010274	0.0343204	Intergenic	Intergenic
2L_14729491_SNP	14729491	C	G	C	PASS	172183	0.515493	PASS	243127	0.343243	0.0002169	0.0460409	FBgn0261571	CG42685	NON_SYNONYMOUS_CODING
2L_14752516_SNP	14752516	T	T	G	PASS	242120	0.331492	PASS	36779	0.17713	0.00010362	0.0344508	Intergenic	Intergenic
2L_14764353_SNP	14764353	G	G	A	PASS	30259	0.163435	PASS	241115	0.323034	8.135e-05	0.0314929	FBgn0028838	CSN1a	DOWNSTREAM	288
2L_1477870_SNP	1477870	A	A	G	PASS	24856	0.184211	PASS	220128	0.367816	2.5e-05	0.0203138	Intergenic	Intergenic
2L_1477876_SNP	1477876	C	C	G	PASS	25857	0.180952	PASS	226121	0.348703	8.73148e-05	0.0322973	Intergenic	Intergenic
2L_1478024_SNP	1478024	A	A	G	PASS	21049	0.189189	PASS	194111	0.363934	0.00013484	0.0380685	Intergenic	Intergenic
2L_14836178_SNP	14836178	T	C	T	PASS	33427	0.0747922	PASS	35886	0.193694	0.0001359	0.0381961	Intergenic	Intergenic
2L_14871482_SNP	14871482	G	T	C	PASS	19666	0.251908	PASS	180137	0.432177	0.00018157	0.0428917	FBgn0032553	CG4480	SYNONYMOUS_CODING
2L_1489841_SNP	1489841	G	G	A	AF	31311	0.0339506	PASS	30350	0.141643	7.61818e-05	0.0306787	Intergenic	Intergenic
2L_14904682_SNP	14904682	G	A	G	PASS	148101	0.405622	PASS	23768	0.222951	0.00013515	0.0380956	Intergenic	Intergenic
2L_14914227_SNP	14914227	C	T	C	PASS	210101	0.324759	PASS	162163	0.501538	0.0002529	0.0488284	FBgn0259213	CG42313	INTRON
2L_1493636_SNP	1493636	C	C	T	PASS	206194	0.485	PASS	286134	0.319048	0.0001881	0.0435302	FBgn0051928	CG31928	UTR_3_PRIME
2L_1493636_SNP	1493636	C	C	T	PASS	206194	0.485	PASS	286134	0.319048	0.0001881	0.0435302	FBgn0053128	CG33128	UPSTREAM	434
2L_1493661_SNP	1493661	G	G	A	PASS	236133	0.360434	PASS	170200	0.540541	0.00010851	0.0350312	FBgn0051928	CG31928	DOWNSTREAM	16
2L_1493661_SNP	1493661	G	G	A	PASS	236133	0.360434	PASS	170200	0.540541	0.00010851	0.0350312	FBgn0053128	CG33128	UPSTREAM	49
2L_1493697_SNP	1493697	A	C	A	PASS	164221	0.574026	PASS	243147	0.376923	1.85042e-05	0.0181426	FBgn0051928	CG31928	DOWNSTREAM	52
2L_1493697_SNP	1493697	A	C	A	PASS	164221	0.574026	PASS	243147	0.376923	1.85042e-05	0.0181426	FBgn0053128	CG33128	UPSTREAM	373
2L_1493813_SNP	1493813	T	T	A	PASS	174244	0.583732	PASS	238166	0.410891	0.00013494	0.0380685	FBgn0051928	CG31928	DOWNSTREAM	168
2L_1493813_SNP	1493813	T	T	A	PASS	174244	0.583732	PASS	238166	0.410891	0.00013494	0.0380685	FBgn0053128	CG33128	UPSTREAM	257
2L_1493843_SNP	1493843	T	T	C	PASS	174220	0.558376	PASS	236151	0.390181	0.00024916	0.0485766	FBgn0051928	CG31928	DOWNSTREAM	198
2L_1493843_SNP	1493843	T	T	C	PASS	174220	0.558376	PASS	236151	0.390181	0.00024916	0.0485766	FBgn0053128	CG33128	UPSTREAM	227
2L_1493856_SNP	1493856	T	T	A	PASS	173217	0.55641	PASS	247148	0.374684	7.24215e-05	0.030128	FBgn0051928	CG31928	DOWNSTREAM	211
2L_1493856_SNP	1493856	T	T	A	PASS	173217	0.55641	PASS	247148	0.374684	7.24215e-05	0.030128	FBgn0053128	CG33128	UPSTREAM	214
2L_1493857_SNP	1493857	T	T	A	PASS	234156	0.4	PASS	29794	0.240409	0.00019918	0.0446813	FBgn0051928	CG31928	DOWNSTREAM	212
2L_1493857_SNP	1493857	T	T	A	PASS	234156	0.4	PASS	29794	0.240409	0.00019918	0.0446813	FBgn0053128	CG33128	UPSTREAM	213
2L_14981900_SNP	14981900	G	G	C	PASS	21183	0.282313	PASS	31248	0.133333	0.0001668	0.041509	FBgn0086711	mol	INTRON
2L_14996482_SNP	14996482	A	G	A	PASS	154120	0.437956	PASS	26896	0.263736	0.00021486	0.0458844	FBgn0086711	mol	INTRON
2L_15000101_SNP	15000101	G	G	C	PASS	250112	0.309392	PASS	158181	0.533923	1.7475e-06	0.00718259	Intergenic	Intergenic
2L_15042283_SNP	15042283	T	C	T	PASS	234106	0.311765	PASS	166159	0.489231	0.00018021	0.0428497	FBgn0004837	Su_H_	INTRON
2L_15045983_SNP	15045983	T	C	T	PASS	245131	0.348404	PASS	184200	0.520833	0.00017575	0.0424365	FBgn0000317	ck	NON_SYNONYMOUS_CODING
2L_15047557_SNP	15047557	T	T	A	PASS	28692	0.243386	PASS	31232	0.0930233	2.00378e-05	0.0186955	FBgn0000317	ck	INTRON
2L_15047581_SNP	15047581	G	G	A	PASS	209161	0.435135	PASS	27893	0.250674	3.20017e-05	0.0220565	FBgn0000317	ck	SYNONYMOUS_CODING
2L_15052266_SNP	15052266	A	A	G	PASS	208179	0.462532	PASS	296112	0.27451	2.03789e-05	0.0187348	FBgn0000317	ck	INTRON
2L_15052270_SNP	15052270	C	C	T	PASS	212170	0.445026	PASS	299101	0.2525	1.111e-05	0.0146128	FBgn0000317	ck	INTRON
2L_15052279_SNP	15052279	A	A	G	PASS	215149	0.409341	PASS	29189	0.234211	5.91e-05	0.0278749	FBgn0000317	ck	INTRON
2L_1506074_SNP	1506074	A	A	G	PASS	26160	0.186916	PASS	232126	0.351955	0.00010908	0.0350721	Intergenic	Intergenic
2L_1506077_SNP	1506077	A	A	C	PASS	26561	0.187117	PASS	230121	0.344729	0.00020794	0.0453534	Intergenic	Intergenic
2L_15072429_SNP	15072429	T	T	C	PASS	129154	0.54417	PASS	16083	0.341564	9.93487e-05	0.0338629	FBgn0262526	vas	DOWNSTREAM	296
2L_15072500_SNP	15072500	T	T	C	PASS	132158	0.544828	PASS	218101	0.316614	3.69032e-06	0.00969409	FBgn0262526	vas	DOWNSTREAM	367
2L_15078243_SNP	15078243	A	T	A	PASS	30349	0.139205	PASS	288113	0.281796	0.00017203	0.0421258	FBgn0028879	CG15270	INTRON
2L_15085867_SNP	15085867	G	G	A	PASS	194157	0.447293	PASS	304102	0.251232	9.73163e-06	0.0140144	FBgn0028879	CG15270	INTRON
2L_15113116_SNP	15113116	G	G	A	PASS	27197	0.263587	PASS	36652	0.124402	0.00012778	0.0373788	FBgn0028878	CG15269	DOWNSTREAM	24
2L_15113116_SNP	15113116	G	G	A	PASS	27197	0.263587	PASS	36652	0.124402	0.00012778	0.0373788	FBgn0001978	stc	UPSTREAM	364
2L_15120970_SNP	15120970	G	A	G	PASS	231146	0.387268	PASS	159204	0.561983	0.00018228	0.0429608	FBgn0264435	CR43853	DOWNSTREAM	151
2L_15135878_SNP	15135878	G	G	T	PASS	23488	0.273292	PASS	27740	0.126183	0.00017218	0.0421258	Intergenic	Intergenic
2L_15153191_SNP	15153191	C	C	T	PASS	213149	0.411602	PASS	26285	0.244957	0.00018011	0.0428429	Intergenic	Intergenic
2L_15153209_SNP	15153209	G	G	A	PASS	229153	0.400524	PASS	26382	0.237681	0.00020431	0.045074	Intergenic	Intergenic
2L_15157580_SNP	15157580	G	T	G	PASS	140176	0.556962	PASS	234127	0.351801	1.86854e-05	0.0181802	Intergenic	Intergenic
2L_15157815_SNP	15157815	G	G	T	PASS	238106	0.30814	PASS	185196	0.514436	8.47795e-06	0.0133168	Intergenic	Intergenic
2L_15179766_SNP	15179766	C	C	T	PASS	24681	0.247706	PASS	29334	0.103976	0.00010275	0.0343204	FBgn0028888	CG4168	INTRON
2L_15181504_SNP	15181504	C	C	T	PASS	20880	0.277778	PASS	155131	0.458042	0.00023062	0.0470976	FBgn0028888	CG4168	INTRON
2L_15185859_SNP	15185859	T	T	C	PASS	22676	0.251656	PASS	29432	0.0981595	4.13118e-05	0.0242315	FBgn0028888	CG4168	INTRON
2L_15188562_SNP	15188562	T	T	C	PASS	20073	0.267399	PASS	26233	0.111864	9.89431e-05	0.0338311	FBgn0028888	CG4168	INTRON
2L_15193840_SNP	15193840	A	A	T	PASS	28489	0.238606	PASS	37545	0.107143	0.00014804	0.0395246	FBgn0028888	CG4168	INTRON
2L_15193842_SNP	15193842	T	T	G	PASS	28389	0.239247	PASS	37443	0.103118	8.1937e-05	0.0315748	FBgn0028888	CG4168	INTRON
2L_15193845_SNP	15193845	T	T	A	PASS	28189	0.240541	PASS	38146	0.107728	0.00013012	0.0376292	FBgn0028888	CG4168	INTRON
2L_15234296_SNP	15234296	A	A	T	PASS	304104	0.254902	PASS	37450	0.117925	9.70628e-05	0.0336809	FBgn0028516	ZnT35C	INTRON
2L_15234323_SNP	15234323	T	T	A	PASS	29282	0.219251	PASS	37539	0.0942029	0.00017825	0.0426546	FBgn0028516	ZnT35C	INTRON
2L_15234384_SNP	15234384	A	A	T	PASS	290104	0.263959	PASS	37547	0.111374	1.671e-05	0.0174913	FBgn0028516	ZnT35C	INTRON
2L_15241551_SNP	15241551	T	T	A	PASS	209133	0.388889	PASS	25775	0.225904	0.00024363	0.0480445	FBgn0028516	ZnT35C	INTRON
2L_15241602_SNP	15241602	A	A	G	PASS	188124	0.397436	PASS	27177	0.221264	8.54345e-05	0.0320879	FBgn0028516	ZnT35C	INTRON
2L_15244896_SNP	15244896	C	C	A	PASS	32228	0.08	PASS	31177	0.198454	0.00025794	0.0491521	FBgn0028516	ZnT35C	INTRON
2L_15260136_SNP	15260136	C	C	A	PASS	20082	0.29078	PASS	29333	0.101227	1.68696e-06	0.00707824	FBgn0045842	yuri	INTRON
2L_15260312_SNP	15260312	G	A	G	PASS	25691	0.262248	PASS	34635	0.0918635	2.05923e-06	0.00763797	FBgn0045842	yuri	DOWNSTREAM	897
2L_15260326_SNP	15260326	C	C	G	PASS	23479	0.252396	PASS	32232	0.0903955	8.79166e-06	0.0135568	FBgn0045842	yuri	DOWNSTREAM	883
2L_15261177_SNP	15261177	T	T	G	PASS	22781	0.262987	PASS	29235	0.107034	4.2963e-05	0.0246997	FBgn0045842	yuri	DOWNSTREAM	32
2L_15261243_SNP	15261243	G	G	T	PASS	284103	0.26615	PASS	35948	0.117936	3.92771e-05	0.0237944	FBgn0045842	yuri	INTRON
2L_15274642_SNP	15274642	T	G	T	PASS	153204	0.571429	PASS	208137	0.397101	0.00024233	0.0479607	FBgn0086691	UK114	SYNONYMOUS_CODING
2L_15283155_SNP	15283155	T	T	C	PASS	22989	0.279874	PASS	30431	0.0925373	7.53144e-07	0.00486618	Intergenic	Intergenic
2L_15288640_SNP	15288640	T	T	C	PASS	214177	0.452685	PASS	27997	0.257979	1.08512e-05	0.0145126	Intergenic	Intergenic
2L_15337255_SNP	15337255	C	C	A	PASS	15191	0.376033	PASS	23657	0.194539	0.00011638	0.0361117	Intergenic	Intergenic
2L_15353411_SNP	15353411	A	A	T	PASS	238100	0.295858	PASS	34357	0.1425	7.69935e-05	0.0308392	Intergenic	Intergenic
2L_15369804_SNP	15369804	A	A	C	PASS	24497	0.284457	PASS	33040	0.108108	2.7543e-06	0.00853878	Intergenic	Intergenic
2L_15373790_SNP	15373790	C	C	G	PASS	19899	0.333333	PASS	32048	0.130435	7.26988e-07	0.00483328	Intergenic	Intergenic
2L_15412836_SNP	15412836	C	C	A	PASS	23484	0.264151	PASS	31338	0.108262	3.37483e-05	0.0227106	Intergenic	Intergenic
2L_15414121_SNP	15414121	C	C	G	PASS	27516	0.0549828	PASS	26755	0.170807	0.00023052	0.0470976	Intergenic	Intergenic
2L_15424289_SNP	15424289	G	G	T	PASS	20376	0.272401	PASS	24227	0.100372	1.83823e-05	0.0180926	FBgn0001983	wor	SYNONYMOUS_CODING
2L_15430386_SNP	15430386	T	T	G	PASS	216106	0.329193	PASS	30965	0.173797	0.00017549	0.0424041	Intergenic	Intergenic
2L_15432430_SNP	15432430	A	A	G	PASS	32423	0.0662824	PASS	32170	0.179028	0.00024304	0.0479835	FBgn0028892	CG4161	UPSTREAM	879
2L_15459378_SNP	15459378	A	A	C	PASS	147135	0.478723	PASS	22191	0.291667	0.00012936	0.0375464	Intergenic	Intergenic
2L_15474720_SNP	15474720	T	T	C	PASS	159146	0.478689	PASS	250101	0.287749	5.39713e-05	0.0271011	Intergenic	Intergenic
2L_15474752_SNP	15474752	C	C	T	PASS	158147	0.481967	PASS	24792	0.271386	8.81669e-06	0.0135568	Intergenic	Intergenic
2L_15474764_SNP	15474764	T	T	C	PASS	152161	0.514377	PASS	25699	0.278873	6.36134e-07	0.00470642	Intergenic	Intergenic
2L_15474805_SNP	15474805	T	T	C	PASS	178146	0.450617	PASS	25698	0.276836	0.00017192	0.0421258	Intergenic	Intergenic
2L_15489927_SNP	15489927	A	A	G	PASS	206123	0.37386	PASS	26770	0.207715	0.00015335	0.0401519	Intergenic	Intergenic
2L_15502320_SNP	15502320	G	G	T	PASS	228127	0.357746	PASS	25161	0.195513	0.00017714	0.0425616	FBgn0002524	lace	SYNONYMOUS_CODING
2L_15507209_SNP	15507209	C	C	A	PASS	27076	0.219653	PASS	32529	0.0819209	5.20289e-05	0.0268071	Intergenic	Intergenic
2L_1551293_SNP	1551293	T	C	T	PASS	231125	0.351124	PASS	168187	0.526761	0.00018464	0.0432123	Intergenic	Intergenic
2L_1555933_SNP	1555933	T	A	T	AF	36716	0.0417755	PASS	26548	0.153355	8.37332e-05	0.0317869	FBgn0261509	haf	INTRON
2L_15629527_SNP	15629527	G	G	C	PASS	151180	0.543807	PASS	254141	0.356962	6.78072e-05	0.0294453	FBgn0028945	CG7631	UTR_3_PRIME
2L_15629527_SNP	15629527	G	G	C	PASS	151180	0.543807	PASS	254141	0.356962	6.78072e-05	0.0294453	FBgn0028518	CG18480	UPSTREAM	475
2L_15738477_SNP	15738477	G	A	G	PASS	26138	0.12709	PASS	22496	0.3	2.03062e-05	0.0187348	FBgn0010382	CycE	INTRON
2L_15756282_SNP	15756282	C	C	A	PASS	31790	0.22113	PASS	231142	0.380697	0.00015689	0.0404902	FBgn0001987	Gli	UTR_3_PRIME
2L_15756282_SNP	15756282	C	C	A	PASS	31790	0.22113	PASS	231142	0.380697	0.00015689	0.0404902	FBgn0001986	l_2_35Df	DOWNSTREAM	382
2L_15762010_SNP	15762010	T	T	A	PASS	30740	0.115274	AF	36910	0.0263852	0.00023107	0.0471327	FBgn0001987	Gli	INTRON
2L_15795162_SNP	15795162	G	G	T	PASS	27188	0.245125	PASS	205147	0.417614	0.00010824	0.0349923	Intergenic	Intergenic
2L_1582841_SNP	1582841	T	T	A	AF	33117	0.0488506	PASS	32562	0.160207	0.0001036	0.0344508	FBgn0261509	haf	INTRON
2L_15829724_SNP	15829724	C	C	T	PASS	217120	0.356083	PASS	167192	0.534819	0.0001615	0.0410312	Intergenic	Intergenic
2L_15829922_SNP	15829922	T	T	C	PASS	24772	0.225705	PASS	196130	0.398773	0.00013102	0.0376727	Intergenic	Intergenic
2L_1583577_SNP	1583577	G	G	T	PASS	38330	0.0726392	PASS	31781	0.203518	3.01334e-05	0.0215874	FBgn0261509	haf	INTRON
2L_15873021_SNP	15873021	G	G	A	AF	30512	0.0378549	PASS	31251	0.140496	0.0001796	0.0428157	Intergenic	Intergenic
2L_15911191_SNP	15911191	A	T	A	PASS	21848	0.180451	PASS	28516	0.0531561	0.00010296	0.0343598	FBgn0028645	beat-Ib	INTRON
2L_15911191_SNP	15911191	A	T	A	PASS	21848	0.180451	PASS	28516	0.0531561	0.00010296	0.0343598	FBgn0266161	CR44867	UPSTREAM	5
2L_15911207_SNP	15911207	G	T	G	PASS	24247	0.16263	AF	34314	0.0392157	2.88066e-05	0.0215127	FBgn0028645	beat-Ib	INTRON
2L_15911207_SNP	15911207	G	T	G	PASS	24247	0.16263	AF	34314	0.0392157	2.88066e-05	0.0215127	FBgn0266161	CR44867	UPSTREAM	484
2L_15911211_SNP	15911211	G	A	G	PASS	24447	0.161512	AF	34213	0.0366197	1.9577e-05	0.0185256	FBgn0028645	beat-Ib	INTRON
2L_15911211_SNP	15911211	G	A	G	PASS	24447	0.161512	AF	34213	0.0366197	1.9577e-05	0.0185256	FBgn0266161	CR44867	UPSTREAM	48
2L_1591446_SNP	1591446	C	C	T	AF	28915	0.0493421	PASS	28358	0.170088	7.74e-05	0.0308857	FBgn0261509	haf	INTRON
2L_1596880_SNP	1596880	A	G	A	PASS	24139	0.139286	PASS	21791	0.295455	0.00017131	0.0420183	FBgn0261509	haf	INTRON
2L_1596880_SNP	1596880	A	G	A	PASS	24139	0.139286	PASS	21791	0.295455	0.00017131	0.0420183	FBgn0051935	CG31935	INTRON
2L_1596881_SNP	1596881	T	A	T	PASS	23940	0.143369	PASS	21593	0.301948	0.00015634	0.0404561	FBgn0261509	haf	INTRON
2L_1596881_SNP	1596881	T	A	T	PASS	23940	0.143369	PASS	21593	0.301948	0.00015634	0.0404561	FBgn0051935	CG31935	INTRON
2L_1602905_SNP	1602905	C	C	T	AF	27310	0.0353357	PASS	20544	0.176707	1.07373e-05	0.0144564	FBgn0051935	CG31935	INTRON
2L_1602905_SNP	1602905	C	C	T	AF	27310	0.0353357	PASS	20544	0.176707	1.07373e-05	0.0144564	FBgn0261509	haf	INTRON
2L_16041252_SNP	16041252	G	C	G	AF	29215	0.0488599	PASS	31562	0.164456	9.81262e-05	0.0337652	FBgn0266459	CG45084	UPSTREAM	795
2L_16041252_SNP	16041252	G	C	G	AF	29215	0.0488599	PASS	31562	0.164456	9.81262e-05	0.0337652	FBgn0000182	BicC	UPSTREAM	795
2L_16041252_SNP	16041252	G	C	G	AF	29215	0.0488599	PASS	31562	0.164456	9.81262e-05	0.0337652	FBgn0028644	beat-Ic	DOWNSTREAM	845
2L_1604790_SNP	1604790	T	A	T	PASS	18346	0.200873	PASS	171114	0.4	4.08561e-05	0.0241317	FBgn0051935	CG31935	INTRON
2L_1604790_SNP	1604790	T	A	T	PASS	18346	0.200873	PASS	171114	0.4	4.08561e-05	0.0241317	FBgn0261509	haf	SYNONYMOUS_CODING
2L_16110662_SNP	16110662	T	T	A	PASS	27393	0.254098	PASS	229162	0.414322	0.00025442	0.0488878	Intergenic	Intergenic
2L_1616888_SNP	1616888	G	A	G	PASS	21895	0.303514	PASS	194181	0.482667	0.00013073	0.0376684	Intergenic	Intergenic
2L_1616905_SNP	1616905	C	T	C	PASS	221103	0.317901	PASS	185187	0.502688	8.27229e-05	0.0316797	Intergenic	Intergenic
2L_16175728_SNP	16175728	A	A	T	PASS	32117	0.0502959	PASS	26651	0.160883	0.00021351	0.045758	FBgn0001991	Ca-alpha1D	SYNONYMOUS_CODING
2L_16176733_SNP	16176733	T	T	C	PASS	31120	0.060423	PASS	26160	0.186916	7.86431e-05	0.0310494	FBgn0001991	Ca-alpha1D	SYNONYMOUS_CODING
2L_16176821_SNP	16176821	C	C	T	PASS	30319	0.0590062	PASS	25255	0.179153	0.00016506	0.0413797	FBgn0001991	Ca-alpha1D	INTRON
2L_16177296_SNP	16177296	G	G	T	PASS	23464	0.214765	PASS	208127	0.379104	0.00025533	0.0489831	FBgn0001991	Ca-alpha1D	INTRON
2L_16177623_SNP	16177623	A	A	G	PASS	24161	0.201987	PASS	211134	0.388406	2.86869e-05	0.0214834	FBgn0001991	Ca-alpha1D	INTRON
2L_1617768_SNP	1617768	C	C	T	AF	2289	0.0379747	PASS	21751	0.190299	6.49475e-06	0.0120976	FBgn0265814	CR44603	DOWNSTREAM	869
2L_16223629_SNP	16223629	C	C	T	PASS	36742	0.102689	PASS	331103	0.237327	6.6975e-05	0.029234	Intergenic	Intergenic
2L_16290731_SNP	16290731	G	T	G	PASS	27039	0.126214	PASS	23687	0.26935	0.0002571	0.0491017	FBgn0040079	pkaap	SYNONYMOUS_CODING
2L_16290731_SNP	16290731	G	T	G	PASS	27039	0.126214	PASS	23687	0.26935	0.0002571	0.0491017	FBgn0028896	CG17329	UPSTREAM	553
2L_16290791_SNP	16290791	A	T	A	AF	30210	0.0320513	PASS	26447	0.151125	2.91625e-05	0.0215184	FBgn0040079	pkaap	UTR_3_PRIME
2L_16290791_SNP	16290791	A	T	A	AF	30210	0.0320513	PASS	26447	0.151125	2.91625e-05	0.0215184	FBgn0028896	CG17329	UPSTREAM	493
2L_16290792_SNP	16290792	T	G	T	AF	30010	0.0322581	PASS	26248	0.154839	2.08568e-05	0.0188447	FBgn0040079	pkaap	UTR_3_PRIME
2L_16290792_SNP	16290792	T	G	T	AF	30010	0.0322581	PASS	26248	0.154839	2.08568e-05	0.0188447	FBgn0028896	CG17329	UPSTREAM	492
2L_16300127_SNP	16300127	A	A	G	PASS	31140	0.11396	AF	37910	0.0257069	0.00021461	0.0458461	FBgn0028895	CG17328	INTRON
2L_16300127_SNP	16300127	A	A	G	PASS	31140	0.11396	AF	37910	0.0257069	0.00021461	0.0458461	FBgn0028375	heix	UPSTREAM	269
2L_16305654_SNP	16305654	C	C	A	PASS	32750	0.132626	AF	39014	0.0346535	0.00011945	0.0364186	FBgn0028525	c_2_M	UTR_3_PRIME
2L_16305654_SNP	16305654	C	C	A	PASS	32750	0.132626	AF	39014	0.0346535	0.00011945	0.0364186	FBgn0015338	CG5861	DOWNSTREAM	147
2L_16305871_SNP	16305871	T	T	C	PASS	31946	0.126027	AF	36711	0.0291005	0.0001041	0.0344946	FBgn0028525	c_2_M	UTR_3_PRIME
2L_16305871_SNP	16305871	T	T	C	PASS	31946	0.126027	AF	36711	0.0291005	0.0001041	0.0344946	FBgn0015338	CG5861	UTR_3_PRIME
2L_16317782_SNP	16317782	G	G	A	PASS	26564	0.194529	PASS	208122	0.369697	5.96951e-05	0.0279457	FBgn0000250	cact	INTRON
2L_16322142_SNP	16322142	A	G	A	PASS	240140	0.368421	PASS	149181	0.548485	0.00013882	0.038521	FBgn0000250	cact	INTRON
2L_16325461_SNP	16325461	C	A	C	PASS	187187	0.5	PASS	250119	0.322493	0.00011166	0.0353966	FBgn0000250	cact	INTRON
2L_16329035_SNP	16329035	T	C	T	PASS	23844	0.156028	PASS	227103	0.312121	0.00021287	0.0457289	FBgn0001995	mRpL4	SYNONYMOUS_CODING
2L_16329035_SNP	16329035	T	C	T	PASS	23844	0.156028	PASS	227103	0.312121	0.00021287	0.0457289	FBgn0040984	CG4440	UPSTREAM	89
2L_16329035_SNP	16329035	T	C	T	PASS	23844	0.156028	PASS	227103	0.312121	0.00021287	0.0457289	FBgn0014092	CG4278	DOWNSTREAM	94
2L_1640396_SNP	1640396	C	T	C	PASS	27291	0.250689	PASS	196161	0.45098	8.52949e-06	0.0133373	Intergenic	Intergenic
2L_1640402_SNP	1640402	T	C	T	PASS	24792	0.271386	PASS	187159	0.459538	4.51586e-05	0.0252513	Intergenic	Intergenic
2L_1640409_SNP	1640409	C	A	C	PASS	24693	0.274336	PASS	191158	0.452722	0.00010564	0.0347204	Intergenic	Intergenic
2L_1641451_SNP	1641451	G	G	A	AF	38618	0.0445545	PASS	34361	0.15099	8.23815e-05	0.0316522	Intergenic	Intergenic
2L_16427903_SNP	16427903	A	A	G	PASS	29062	0.176136	PASS	34822	0.0594595	0.00012229	0.0366425	FBgn0028523	CG5888	INTRON
2L_16428653_SNP	16428653	A	A	G	AF	33714	0.039886	PASS	34858	0.142857	0.0001213	0.0365913	FBgn0028523	CG5888	INTRON
2L_16428658_SNP	16428658	A	A	C	AF	33016	0.0462428	PASS	34760	0.14742	0.00024054	0.0478217	FBgn0028523	CG5888	INTRON
2L_16428667_SNP	16428667	T	T	G	PASS	34419	0.0523416	PASS	36169	0.160465	0.00013196	0.037769	FBgn0028523	CG5888	INTRON
2L_16430182_SNP	16430182	G	G	A	PASS	30625	0.0755287	PASS	25682	0.242604	2.20531e-06	0.007782	FBgn0028523	CG5888	INTRON
2L_16430198_SNP	16430198	C	C	A	PASS	31926	0.0753623	PASS	25681	0.240356	2.38095e-06	0.0080656	FBgn0028523	CG5888	INTRON
2L_16440742_SNP	16440742	A	A	C	PASS	261101	0.279006	PASS	183163	0.471098	2.84367e-05	0.0214422	FBgn0028523	CG5888	INTRON
2L_16451917_SNP	16451917	G	T	G	PASS	32035	0.0985916	PASS	29988	0.22739	0.00019054	0.0437579	FBgn0020414	Idgf3	SYNONYMOUS_CODING
2L_1645851_SNP	1645851	G	G	T	PASS	31619	0.0567164	PASS	28259	0.173021	0.00014929	0.0396584	Intergenic	Intergenic
2L_1649829_SNP	1649829	T	A	T	PASS	30831	0.0914454	PASS	28290	0.241935	2.01658e-05	0.0186955	Intergenic	Intergenic
2L_16503676_SNP	16503676	G	G	A	PASS	24117	0.0658915	PASS	21655	0.202952	0.0001187	0.0362976	FBgn0032586	Tpr2	INTRON
2L_1651563_SNP	1651563	T	T	A	AF	34613	0.0362117	PASS	30649	0.138028	0.00013382	0.0379443	FBgn0086758	chinmo	INTRON
2L_16525741_SNP	16525741	G	G	A	PASS	31329	0.0847953	PASS	29377	0.208108	0.00022905	0.0470214	FBgn0032587	CG5953	INTRON
2L_16531670_SNP	16531670	G	G	C	PASS	33284	0.201923	PASS	252138	0.353846	0.00019739	0.0444684	FBgn0032587	CG5953	INTRON
2L_16531685_SNP	16531685	T	T	A	PASS	40829	0.0663616	PASS	31782	0.205514	6.68185e-06	0.0121608	FBgn0032587	CG5953	INTRON
2L_16532298_SNP	16532298	A	A	T	PASS	36024	0.0625	PASS	33877	0.185542	4.39012e-05	0.0248723	FBgn0032587	CG5953	INTRON
2L_16532374_SNP	16532374	A	A	T	PASS	30198	0.245614	PASS	38624	0.0585366	1.02962e-08	0.00123552	FBgn0032587	CG5953	INTRON
2L_16539809_SNP	16539809	T	T	C	PASS	34328	0.0754717	PASS	28569	0.194915	0.00020523	0.0451267	Intergenic	Intergenic
2L_16539853_SNP	16539853	T	T	G	PASS	31226	0.0769231	PASS	26366	0.200608	0.00021244	0.0456887	Intergenic	Intergenic
2L_16544218_SNP	16544218	T	T	C	PASS	39039	0.0909091	PASS	34992	0.208617	0.00021242	0.0456887	FBgn0259735	CG42389	UPSTREAM	798
2L_16544218_SNP	16544218	T	T	C	PASS	39039	0.0909091	PASS	34992	0.208617	0.00021242	0.0456887	FBgn0051816	CG31816	DOWNSTREAM	955
2L_16550746_SNP	16550746	A	A	T	PASS	30925	0.0748503	PASS	24381	0.25	9.86637e-07	0.00559197	FBgn0259735	CG42389	INTRON
2L_16550746_SNP	16550746	A	A	T	PASS	30925	0.0748503	PASS	24381	0.25	9.86637e-07	0.00559197	FBgn0032588	CG5968	UPSTREAM	787
2L_16550748_SNP	16550748	C	C	T	PASS	31425	0.0737463	PASS	24682	0.25	7.29025e-07	0.00483328	FBgn0259735	CG42389	INTRON
2L_16550748_SNP	16550748	C	C	T	PASS	31425	0.0737463	PASS	24682	0.25	7.29025e-07	0.00483328	FBgn0032588	CG5968	UPSTREAM	789
2L_16563028_SNP	16563028	C	C	T	PASS	14966	0.306977	PASS	21130	0.124481	5.6308e-05	0.0273695	FBgn0259735	CG42389	INTRON
2L_16566044_SNP	16566044	A	A	T	PASS	33218	0.0514286	PASS	29666	0.18232	1.66341e-05	0.0174572	FBgn0259735	CG42389	INTRON
2L_16566049_SNP	16566049	T	T	A	AF	35013	0.0358127	PASS	30757	0.156593	1.31453e-05	0.0158518	FBgn0259735	CG42389	INTRON
2L_16566052_SNP	16566052	G	G	T	PASS	33220	0.0568182	PASS	30061	0.168975	0.00017871	0.0427267	FBgn0259735	CG42389	INTRON
2L_16566054_SNP	16566054	T	T	A	AF	33913	0.0369318	PASS	31158	0.157182	1.636e-05	0.0173391	FBgn0259735	CG42389	INTRON
2L_16566056_SNP	16566056	G	G	A	AF	34216	0.0446927	PASS	30957	0.155738	8.5327e-05	0.0320628	FBgn0259735	CG42389	INTRON
2L_16566074_SNP	16566074	C	C	T	PASS	34022	0.0607735	PASS	31567	0.175393	0.00014182	0.0388775	FBgn0259735	CG42389	INTRON
2L_16578560_SNP	16578560	A	A	T	PASS	38528	0.0677966	PASS	31376	0.195373	3.531e-05	0.0229817	FBgn0259735	CG42389	INTRON
2L_16596167_SNP	16596167	T	T	G	PASS	32838	0.103825	PASS	28696	0.251309	3.44886e-05	0.022806	FBgn0259735	CG42389	INTRON
2L_16596226_SNP	16596226	A	A	T	PASS	33544	0.116095	PASS	281103	0.268229	3.05218e-05	0.0216908	FBgn0259735	CG42389	INTRON
2L_16602293_SNP	16602293	C	C	A	PASS	36428	0.0714286	PASS	32782	0.200489	3.69315e-05	0.0233377	FBgn0259735	CG42389	INTRON
2L_16603225_SNP	16603225	T	T	C	PASS	36231	0.0788804	PASS	32581	0.199507	0.00013579	0.0381801	FBgn0259735	CG42389	INTRON
2L_16603356_SNP	16603356	T	T	C	PASS	33227	0.0752089	PASS	35483	0.189931	0.00022458	0.0467242	FBgn0259735	CG42389	INTRON
2L_16603431_SNP	16603431	A	A	G	PASS	34523	0.0625	PASS	35278	0.181395	7.187e-05	0.0300888	FBgn0259735	CG42389	INTRON
2L_16603432_SNP	16603432	G	G	A	PASS	34723	0.0621622	PASS	35577	0.178241	9.38086e-05	0.0332267	FBgn0259735	CG42389	INTRON
2L_16603437_SNP	16603437	A	A	C	PASS	33525	0.0694444	PASS	34385	0.198598	3.711e-05	0.0233876	FBgn0259735	CG42389	INTRON
2L_1660883_SNP	1660883	G	G	A	AF	32014	0.0419162	PASS	27156	0.171254	1.516e-05	0.0167936	FBgn0086758	chinmo	INTRON
2L_16610939_SNP	16610939	T	G	T	PASS	25967	0.205521	PASS	252150	0.373134	8.82835e-05	0.0324214	FBgn0259735	CG42389	INTRON
2L_16610939_SNP	16610939	T	G	T	PASS	25967	0.205521	PASS	252150	0.373134	8.82835e-05	0.0324214	FBgn0032590	CG4631	DOWNSTREAM	92
2L_16628555_SNP	16628555	C	C	T	PASS	34420	0.0549451	PASS	31975	0.190355	8.73097e-06	0.0135064	FBgn0259735	CG42389	INTRON
2L_16628555_SNP	16628555	C	C	T	PASS	34420	0.0549451	PASS	31975	0.190355	8.73097e-06	0.0135064	FBgn0265000	CR44151	DOWNSTREAM	197
2L_16645605_SNP	16645605	T	A	T	PASS	24457	0.189369	PASS	188106	0.360544	0.00013189	0.0377559	FBgn0259735	CG42389	INTRON
2L_16653973_SNP	16653973	G	G	A	PASS	27725	0.0827815	PASS	24566	0.212219	0.00023691	0.0476145	FBgn0259735	CG42389	INTRON
2L_16656945_SNP	16656945	T	T	G	PASS	36326	0.066838	PASS	34489	0.205543	8.11388e-06	0.0131232	FBgn0259735	CG42389	INTRON
2L_16666899_SNP	16666899	A	A	G	PASS	33430	0.0824176	PASS	30180	0.209974	0.00010902	0.0350721	FBgn0032593	Trpgamma	INTRON
2L_16674798_SNP	16674798	C	C	T	PASS	38442	0.0985916	PASS	335116	0.257206	3.05686e-06	0.00914361	FBgn0032593	Trpgamma	INTRON
2L_16674858_SNP	16674858	T	T	A	PASS	36542	0.103194	PASS	358108	0.23176	0.00011112	0.0353272	FBgn0032593	Trpgamma	INTRON
2L_16675317_SNP	16675317	C	C	T	PASS	36427	0.0690537	PASS	32378	0.194514	5.10889e-05	0.0266129	FBgn0032593	Trpgamma	INTRON
2L_16675337_SNP	16675337	C	C	A	PASS	36126	0.0671835	PASS	33072	0.179104	0.00020309	0.0450132	FBgn0032593	Trpgamma	INTRON
2L_16684673_SNP	16684673	T	A	T	PASS	300167	0.357602	PASS	225240	0.516129	0.00025207	0.0487673	FBgn0261278	grp	INTRON
2L_16684673_SNP	16684673	T	A	T	PASS	300167	0.357602	PASS	225240	0.516129	0.00025207	0.0487673	FBgn0051807	CG31807	UPSTREAM	665
2L_16687547_SNP	16687547	T	T	C	PASS	34428	0.0752688	PASS	35584	0.191344	0.0001779	0.042646	FBgn0261278	grp	INTRON
2L_16692897_SNP	16692897	C	C	T	PASS	25819	0.0685921	PASS	25278	0.236364	2.96605e-06	0.00895948	FBgn0261278	grp	INTRON
2L_16696205_SNP	16696205	A	A	G	PASS	34748	0.121519	PASS	27597	0.260753	0.00012872	0.0374789	FBgn0261278	grp	INTRON
2L_16701270_SNP	16701270	A	A	T	PASS	34334	0.0901857	PASS	28880	0.217391	0.00015698	0.0404941	FBgn0263745	CR43670	EXON
2L_16701270_SNP	16701270	A	A	T	PASS	34334	0.0901857	PASS	28880	0.217391	0.00015698	0.0404941	FBgn0263744	CR43669	UPSTREAM	445
2L_16706311_SNP	16706311	C	C	G	PASS	28217	0.0568562	PASS	25154	0.177049	0.00017807	0.042646	FBgn0062978	CG31808	INTRON
2L_16713499_SNP	16713499	G	G	A	PASS	35744	0.109726	PASS	29392	0.238961	0.00020633	0.0452065	FBgn0062978	CG31808	INTRON
2L_16713924_SNP	16713924	T	T	C	PASS	33263	0.159494	PASS	299128	0.299766	0.00023192	0.0472154	FBgn0062978	CG31808	INTRON
2L_16713926_SNP	16713926	A	A	G	PASS	33761	0.153266	PASS	291127	0.303828	7.79826e-05	0.0309585	FBgn0062978	CG31808	INTRON
2L_16713989_SNP	16713989	C	C	T	PASS	29142	0.126126	PASS	291108	0.270677	0.00011592	0.0360783	FBgn0062978	CG31808	INTRON
2L_16717838_SNP	16717838	T	T	C	PASS	30922	0.0664653	PASS	28070	0.2	4.23619e-05	0.0245559	FBgn0086907	Cyt-c-d	INTRON
2L_16717850_SNP	16717850	G	G	A	PASS	32017	0.0504451	PASS	26077	0.228487	9.37832e-08	0.00231354	FBgn0086907	Cyt-c-d	INTRON
2L_16722878_SNP	16722878	G	G	T	PASS	34844	0.112245	PASS	26987	0.244382	0.00021355	0.045758	FBgn0027779	VhaSFD	DOWNSTREAM	5
2L_16722878_SNP	16722878	G	G	T	PASS	34844	0.112245	PASS	26987	0.244382	0.00021355	0.045758	FBgn0000409	Cyt-c-p	DOWNSTREAM	234
2L_16736412_SNP	16736412	T	T	C	PASS	34228	0.0756757	PASS	29683	0.218997	1.41485e-05	0.0163287	FBgn0015391	glu	INTRON
2L_16759235_SNP	16759235	G	G	A	PASS	31631	0.0893372	PASS	30583	0.213918	0.00021194	0.0456255	FBgn0032602	ppk17	SYNONYMOUS_CODING
2L_16759235_SNP	16759235	G	G	A	PASS	31631	0.0893372	PASS	30583	0.213918	0.00021194	0.0456255	FBgn0032601	yellow-b	DOWNSTREAM	952
2L_16762083_SNP	16762083	C	T	C	PASS	31354	0.147139	PASS	264108	0.290323	0.00021255	0.0456927	Intergenic	Intergenic
2L_16793811_SNP	16793811	C	T	C	PASS	5573	0.570312	PASS	7936	0.313043	0.00023512	0.047512	FBgn0032603	CG17928	DOWNSTREAM	367
2L_16793811_SNP	16793811	C	T	C	PASS	5573	0.570312	PASS	7936	0.313043	0.00023512	0.047512	FBgn0040262	Ugt36Ba	UPSTREAM	4
2L_16795863_SNP	16795863	C	T	C	PASS	31946	0.126027	PASS	285107	0.272959	7.5186e-05	0.0305671	FBgn0040262	Ugt36Ba	DOWNSTREAM	36
2L_16795863_SNP	16795863	C	T	C	PASS	31946	0.126027	PASS	285107	0.272959	7.5186e-05	0.0305671	FBgn0040261	Ugt36Bb	UPSTREAM	732
2L_16796025_SNP	16796025	T	T	A	PASS	38638	0.0896226	PASS	33397	0.225581	3.08281e-05	0.0217771	FBgn0040262	Ugt36Ba	DOWNSTREAM	16
2L_16796025_SNP	16796025	T	T	A	PASS	38638	0.0896226	PASS	33397	0.225581	3.08281e-05	0.0217771	FBgn0040261	Ugt36Bb	UPSTREAM	57
2L_16796268_SNP	16796268	T	C	T	PASS	29294	0.243523	PASS	212154	0.420765	5.237e-05	0.0268576	FBgn0040262	Ugt36Ba	DOWNSTREAM	259
2L_16796268_SNP	16796268	T	C	T	PASS	29294	0.243523	PASS	212154	0.420765	5.237e-05	0.0268576	FBgn0040261	Ugt36Bb	UPSTREAM	327
2L_16796281_SNP	16796281	G	G	A	PASS	37220	0.0510204	PASS	30268	0.183784	8.55564e-06	0.0133373	FBgn0040262	Ugt36Ba	DOWNSTREAM	272
2L_16796281_SNP	16796281	G	G	A	PASS	37220	0.0510204	PASS	30268	0.183784	8.55564e-06	0.0133373	FBgn0040261	Ugt36Bb	UPSTREAM	314
2L_16818587_SNP	16818587	C	C	T	PASS	34631	0.0822281	PASS	33385	0.203349	0.0001554	0.0403644	FBgn0004797	mdy	INTRON
2L_16818587_SNP	16818587	C	C	T	PASS	34631	0.0822281	PASS	33385	0.203349	0.0001554	0.0403644	FBgn0032609	CG13280	INTRON
2L_16819428_SNP	16819428	T	T	G	PASS	33261	0.155216	PASS	291145	0.332569	4.9065e-06	0.010704	FBgn0004797	mdy	INTRON
2L_16819428_SNP	16819428	T	T	G	PASS	33261	0.155216	PASS	291145	0.332569	4.9065e-06	0.010704	FBgn0032609	CG13280	INTRON
2L_16819805_SNP	16819805	C	C	T	PASS	38140	0.0950119	PASS	295100	0.253165	4.33438e-06	0.0100882	FBgn0004797	mdy	INTRON
2L_16819805_SNP	16819805	C	C	T	PASS	38140	0.0950119	PASS	295100	0.253165	4.33438e-06	0.0100882	FBgn0032609	CG13280	INTRON
2L_16831081_SNP	16831081	G	G	T	PASS	23418	0.0714286	PASS	21455	0.204461	0.00023779	0.0476689	FBgn0051739	CG31739	SYNONYMOUS_CODING
2L_16831081_SNP	16831081	G	G	T	PASS	23418	0.0714286	PASS	21455	0.204461	0.00023779	0.0476689	FBgn0032612	CG13282	DOWNSTREAM	984
2L_16831508_SNP	16831508	C	C	T	PASS	23145	0.163043	PASS	211100	0.321543	0.00024465	0.0481215	FBgn0051739	CG31739	UTR_3_PRIME
2L_16831508_SNP	16831508	C	C	T	PASS	23145	0.163043	PASS	211100	0.321543	0.00024465	0.0481215	FBgn0032612	CG13282	DOWNSTREAM	557
2L_16847334_SNP	16847334	C	C	A	PASS	29539	0.116766	PASS	290120	0.292683	3.21746e-06	0.00927424	FBgn0032614	CG13284	INTRON
2L_16853767_SNP	16853767	C	T	C	PASS	24750	0.16835	PASS	16187	0.350806	5.88724e-05	0.0278414	FBgn0051809	CG31809	SYNONYMOUS_CODING
2L_16853768_SNP	16853768	A	T	A	PASS	25049	0.16388	PASS	16983	0.329365	0.00019855	0.0446131	FBgn0051809	CG31809	NON_SYNONYMOUS_CODING
2L_16859938_SNP	16859938	A	G	A	PASS	32472	0.181818	PASS	281139	0.330952	0.00016806	0.0417003	FBgn0032615	CG6012	DOWNSTREAM	91
2L_16860339_SNP	16860339	A	A	G	PASS	29824	0.0745342	PASS	25262	0.197452	0.00025683	0.0490892	FBgn0032615	CG6012	NON_SYNONYMOUS_CODING
2L_16866556_SNP	16866556	C	C	T	PASS	31846	0.126374	PASS	253105	0.293296	1.35078e-05	0.0159553	Intergenic	Intergenic
2L_16867158_SNP	16867158	A	G	A	PASS	29556	0.159544	PASS	228129	0.361345	1.2266e-06	0.00607936	Intergenic	Intergenic
2L_16867178_SNP	16867178	T	T	C	PASS	32238	0.105556	PASS	26798	0.268493	8.92846e-06	0.0136465	Intergenic	Intergenic
2L_16867182_SNP	16867182	A	A	T	PASS	32639	0.106849	PASS	265101	0.275956	4.63017e-06	0.0104163	Intergenic	Intergenic
2L_16874527_SNP	16874527	T	T	A	PASS	37532	0.0786241	PASS	31692	0.22549	6.62374e-06	0.012114	FBgn0051781	CR31781	INTRON
2L_16876129_SNP	16876129	T	T	C	PASS	38330	0.0726392	PASS	32377	0.1925	0.0001001	0.0339763	FBgn0051781	CR31781	INTRON
2L_16876149_SNP	16876149	G	G	A	PASS	39234	0.0798122	PASS	32882	0.2	0.00012055	0.0365221	FBgn0051781	CR31781	INTRON
2L_16876166_SNP	16876166	A	A	G	PASS	39234	0.0798122	PASS	33498	0.226852	5.02102e-06	0.0107849	FBgn0051781	CR31781	EXON
2L_1687660_SNP	1687660	T	C	T	PASS	26937	0.120915	PASS	25190	0.26393	0.00020274	0.0449733	FBgn0086758	chinmo	INTRON
2L_16880541_SNP	16880541	T	C	T	PASS	179201	0.528947	PASS	231125	0.351124	0.00013106	0.0376727	FBgn0032618	CG31743	INTRON
2L_16880541_SNP	16880541	T	C	T	PASS	179201	0.528947	PASS	231125	0.351124	0.00013106	0.0376727	FBgn0085342	CG34313	INTRON
2L_16883104_SNP	16883104	G	G	A	PASS	31027	0.0801187	PASS	29978	0.206897	0.00013254	0.0378173	FBgn0085342	CG34313	INTRON
2L_16883104_SNP	16883104	G	G	A	PASS	31027	0.0801187	PASS	29978	0.206897	0.00013254	0.0378173	FBgn0032618	CG31743	INTRON
2L_16887555_SNP	16887555	T	C	T	PASS	20091	0.312715	PASS	159158	0.498423	0.00014668	0.0394861	FBgn0040985	CG6115	SYNONYMOUS_CODING
2L_16887555_SNP	16887555	T	C	T	PASS	20091	0.312715	PASS	159158	0.498423	0.00014668	0.0394861	FBgn0261671	tweek	UPSTREAM	935
2L_16887555_SNP	16887555	T	C	T	PASS	20091	0.312715	PASS	159158	0.498423	0.00014668	0.0394861	FBgn0265542	CR44392	UPSTREAM	952
2L_16904846_SNP	16904846	T	T	C	PASS	34531	0.0824468	PASS	29078	0.211957	8.98165e-05	0.0326108	FBgn0261671	tweek	INTRON
2L_16906786_SNP	16906786	A	A	C	PASS	235127	0.350829	PASS	148196	0.569767	3.66464e-06	0.00969253	FBgn0261671	tweek	SYNONYMOUS_CODING
2L_16907301_SNP	16907301	G	G	A	PASS	29242	0.125749	PASS	23794	0.283988	5.0142e-05	0.026407	FBgn0261671	tweek	SYNONYMOUS_CODING
2L_16907301_SNP	16907301	G	G	A	PASS	29242	0.125749	PASS	23794	0.283988	5.0142e-05	0.026407	FBgn0026150	ApepP	DOWNSTREAM	928
2L_16926405_SNP	16926405	A	A	G	PASS	29565	0.180556	PASS	229116	0.336232	0.00017923	0.0427791	Intergenic	Intergenic
2L_16926457_SNP	16926457	C	C	G	PASS	34851	0.12782	PASS	25694	0.268571	0.00015302	0.0401352	Intergenic	Intergenic
2L_16931286_SNP	16931286	C	C	T	PASS	30624	0.0727273	PASS	29069	0.192201	0.00022908	0.0470224	Intergenic	Intergenic
2L_16931327_SNP	16931327	G	G	A	PASS	30739	0.112717	PASS	26091	0.259259	7.684e-05	0.0308392	Intergenic	Intergenic
2L_16931538_SNP	16931538	A	C	A	PASS	25345	0.151007	PASS	209101	0.325806	3.79186e-05	0.023451	Intergenic	Intergenic
2L_16938592_SNP	16938592	G	G	C	PASS	35944	0.109181	PASS	29491	0.236364	0.00024449	0.0481154	Intergenic	Intergenic
2L_1694076_SNP	1694076	T	C	T	AF	28712	0.0401338	PASS	30761	0.165761	1.9995e-05	0.0186955	FBgn0086758	chinmo	INTRON
2L_16941270_SNP	16941270	C	A	C	PASS	16088	0.354839	PASS	126175	0.581395	1.124e-05	0.0147184	Intergenic	Intergenic
2L_16950448_SNP	16950448	G	G	A	PASS	19578	0.285714	PASS	161142	0.468647	0.0001996	0.0446928	FBgn0265543	CR44393	UPSTREAM	378
2L_16954624_SNP	16954624	G	G	A	PASS	24826	0.0948905	PASS	22771	0.238255	0.00015421	0.0402768	Intergenic	Intergenic
2L_16957141_SNP	16957141	A	A	G	PASS	21561	0.221014	PASS	197128	0.393846	0.00018452	0.0432123	Intergenic	Intergenic
2L_16957149_SNP	16957149	T	T	A	PASS	21359	0.216912	PASS	185132	0.416404	2.1023e-05	0.0189501	Intergenic	Intergenic
2L_16971804_SNP	16971804	A	A	T	PASS	31224	0.0714286	PASS	30281	0.211488	2.08828e-05	0.0188571	Intergenic	Intergenic
2L_17000564_SNP	17000564	A	A	T	PASS	32322	0.0637681	PASS	29464	0.178771	0.00020864	0.0453965	Intergenic	Intergenic
2L_17000617_SNP	17000617	G	G	T	PASS	30519	0.058642	PASS	23067	0.225589	1.34432e-06	0.00643822	Intergenic	Intergenic
2L_17000645_SNP	17000645	T	T	C	PASS	29923	0.0714286	PASS	25564	0.200627	0.0001173	0.0361813	Intergenic	Intergenic
2L_17001604_SNP	17001604	G	T	G	PASS	18562	0.251012	PASS	158124	0.439716	0.00014681	0.0394896	Intergenic	Intergenic
2L_17002436_SNP	17002436	G	G	T	PASS	22021	0.0871369	PASS	20362	0.233962	0.00016348	0.0412388	Intergenic	Intergenic
2L_17006244_SNP	17006244	G	G	C	PASS	28331	0.0987261	PASS	27791	0.247283	4.37375e-05	0.0248362	Intergenic	Intergenic
2L_17007795_SNP	17007795	C	C	T	PASS	23920	0.0772201	PASS	26676	0.222222	5.34158e-05	0.0270065	Intergenic	Intergenic
2L_17007829_SNP	17007829	A	A	G	PASS	26520	0.0701754	PASS	26672	0.213018	3.49387e-05	0.0229353	Intergenic	Intergenic
2L_17015732_SNP	17015732	T	C	T	PASS	19471	0.267925	PASS	154126	0.45	0.00023962	0.0477897	Intergenic	Intergenic
2L_17020590_SNP	17020590	C	C	A	PASS	22418	0.0743802	PASS	21861	0.218638	0.00010408	0.0344933	Intergenic	Intergenic
2L_17029522_SNP	17029522	T	C	T	PASS	22246	0.171642	PASS	219111	0.336364	0.00016571	0.0414539	Intergenic	Intergenic
2L_17032124_SNP	17032124	T	T	G	PASS	21693	0.300971	PASS	159150	0.485437	0.00013691	0.0383112	Intergenic	Intergenic
2L_17032326_SNP	17032326	T	T	A	PASS	26633	0.110368	PASS	25189	0.261765	7.289e-05	0.0301705	Intergenic	Intergenic
2L_17040054_SNP	17040054	A	C	A	PASS	19447	0.195021	PASS	181106	0.369338	0.00021688	0.0460409	Intergenic	Intergenic
2L_17059568_SNP	17059568	G	G	C	PASS	20243	0.17551	AF	30916	0.0492308	9.47777e-05	0.0333603	Intergenic	Intergenic
2L_17063780_SNP	17063780	C	C	A	PASS	20463	0.235955	PASS	169119	0.413194	0.00022846	0.0469684	Intergenic	Intergenic
2L_17063818_SNP	17063818	A	A	G	PASS	20150	0.199203	PASS	176116	0.39726	2.95274e-05	0.0215241	Intergenic	Intergenic
2L_17084716_SNP	17084716	G	G	A	PASS	22429	0.114625	PASS	19774	0.273063	0.00013043	0.0376476	FBgn0264367	CR43819	UPSTREAM	934
2L_17086492_SNP	17086492	A	A	T	PASS	20869	0.249097	PASS	34328	0.0754717	1.61551e-06	0.00694978	FBgn0264367	CR43819	DOWNSTREAM	73
2L_17108344_SNP	17108344	A	T	A	PASS	22147	0.175373	PASS	17294	0.353383	0.00010454	0.0345571	Intergenic	Intergenic
2L_17113205_SNP	17113205	A	T	A	PASS	122147	0.546468	PASS	184102	0.356643	0.00020388	0.045074	Intergenic	Intergenic
2L_17119856_SNP	17119856	A	A	T	PASS	23222	0.0866142	PASS	22171	0.243151	4.521e-05	0.0252513	Intergenic	Intergenic
2L_17136323_SNP	17136323	A	G	A	PASS	20483	0.289199	PASS	146135	0.480427	0.00011416	0.0357889	FBgn0265607	beat-IIIa	INTRON
2L_17136323_SNP	17136323	A	G	A	PASS	20483	0.289199	PASS	146135	0.480427	0.00011416	0.0357889	FBgn0083942	CG34106	INTRON
2L_17136324_SNP	17136324	A	T	A	PASS	19682	0.294964	PASS	145135	0.482143	0.00017875	0.0427267	FBgn0083942	CG34106	INTRON
2L_17136324_SNP	17136324	A	T	A	PASS	19682	0.294964	PASS	145135	0.482143	0.00017875	0.0427267	FBgn0265607	beat-IIIa	INTRON
2L_17136334_SNP	17136334	G	A	G	PASS	21578	0.266212	PASS	151134	0.470175	2.96766e-05	0.0215435	FBgn0083942	CG34106	INTRON
2L_17136334_SNP	17136334	G	A	G	PASS	21578	0.266212	PASS	151134	0.470175	2.96766e-05	0.0215435	FBgn0265607	beat-IIIa	INTRON
2L_17136337_SNP	17136337	C	A	C	PASS	20780	0.278746	PASS	153132	0.463158	0.00017212	0.0421258	FBgn0083942	CG34106	INTRON
2L_17136337_SNP	17136337	C	A	C	PASS	20780	0.278746	PASS	153132	0.463158	0.00017212	0.0421258	FBgn0265607	beat-IIIa	INTRON
2L_17166515_SNP	17166515	G	A	G	PASS	18151	0.219828	PASS	175123	0.412752	7.631e-05	0.030706	FBgn0265607	beat-IIIa	INTRON
2L_17166515_SNP	17166515	G	A	G	PASS	18151	0.219828	PASS	175123	0.412752	7.631e-05	0.030706	FBgn0083942	CG34106	INTRON
2L_17166517_SNP	17166517	A	T	A	PASS	17451	0.226667	PASS	178126	0.414474	0.00013065	0.0376665	FBgn0083942	CG34106	INTRON
2L_17166517_SNP	17166517	A	T	A	PASS	17451	0.226667	PASS	178126	0.414474	0.00013065	0.0376665	FBgn0265607	beat-IIIa	INTRON
2L_17187141_SNP	17187141	C	C	T	PASS	118136	0.535433	PASS	20395	0.318792	2.15079e-05	0.0191617	FBgn0032629	beat-IIIc	DOWNSTREAM	496
2L_17195002_SNP	17195002	A	A	G	PASS	177128	0.419672	PASS	21765	0.230496	6.14553e-05	0.0283134	FBgn0032629	beat-IIIc	INTRON
2L_17223840_SNP	17223840	G	G	C	PASS	28330	0.0958467	PASS	27095	0.260274	8.02334e-06	0.0130719	FBgn0032629	beat-IIIc	INTRON
2L_17223870_SNP	17223870	A	A	G	PASS	28136	0.113565	PASS	270104	0.278075	1.48356e-05	0.0166695	FBgn0032629	beat-IIIc	INTRON
2L_17230870_SNP	17230870	G	G	T	PASS	28021	0.0697674	PASS	25171	0.220497	1.4825e-05	0.0166695	FBgn0032629	beat-IIIc	INTRON
2L_17250945_SNP	17250945	T	C	T	PASS	28144	0.135385	PASS	23594	0.285714	0.00014878	0.0396102	FBgn0032629	beat-IIIc	INTRON
2L_17270372_SNP	17270372	T	T	C	PASS	154129	0.45583	PASS	27486	0.238889	3.49237e-06	0.0095725	Intergenic	Intergenic
2L_17271974_SNP	17271974	A	A	T	PASS	20954	0.205323	PASS	26320	0.0706714	0.00015702	0.0404971	Intergenic	Intergenic
2L_1728285_SNP	1728285	C	C	A	PASS	37945	0.106132	PASS	26487	0.247863	5.86454e-05	0.0278133	FBgn0000579	Eno	INTRON
2L_1728285_SNP	1728285	C	C	A	PASS	37945	0.106132	PASS	26487	0.247863	5.86454e-05	0.0278133	FBgn0260648	Rrp40	UPSTREAM	447
2L_17289395_SNP	17289395	G	G	T	PASS	136178	0.566879	PASS	219139	0.388268	0.00021082	0.0455205	Intergenic	Intergenic
2L_17293174_SNP	17293174	T	T	A	PASS	19732	0.139738	PASS	17681	0.315175	0.00010137	0.0341128	FBgn0032632	CG6380	UPSTREAM	972
2L_17293175_SNP	17293175	A	A	C	PASS	19033	0.147982	PASS	17384	0.326848	0.00010239	0.0342742	FBgn0032632	CG6380	UPSTREAM	973
2L_17293208_SNP	17293208	C	C	T	PASS	22318	0.0746888	PASS	22471	0.240678	1.25384e-05	0.0156626	Intergenic	Intergenic
2L_17296997_SNP	17296997	G	A	G	PASS	32117	0.0502959	PASS	26664	0.193939	5.52492e-06	0.0113187	Intergenic	Intergenic
2L_17297016_SNP	17297016	A	G	A	AF	31516	0.0483384	PASS	27458	0.174699	3.356e-05	0.0226716	Intergenic	Intergenic
2L_17297022_SNP	17297022	G	G	A	AF	3309	0.0265487	PASS	30040	0.117647	0.00024526	0.0481828	Intergenic	Intergenic
2L_17297124_SNP	17297124	T	G	T	PASS	35820	0.0529101	PASS	31368	0.178478	2.31243e-05	0.0196966	Intergenic	Intergenic
2L_17303335_SNP	17303335	A	A	T	PASS	29825	0.0773994	PASS	27577	0.21875	3.57375e-05	0.0230812	Intergenic	Intergenic
2L_17303373_SNP	17303373	G	G	A	PASS	29817	0.0539683	PASS	29161	0.173295	0.00010079	0.0341015	Intergenic	Intergenic
2L_17308970_SNP	17308970	T	C	T	PASS	28450	0.149701	PASS	245113	0.315642	3.918e-05	0.0237888	Intergenic	Intergenic
2L_17309509_SNP	17309509	A	A	T	PASS	131185	0.585443	PASS	223148	0.398922	9.978e-05	0.0339332	Intergenic	Intergenic
2L_17313683_SNP	17313683	G	G	T	PASS	18784	0.309963	PASS	148160	0.519481	2.71239e-05	0.0211077	Intergenic	Intergenic
2L_17326732_SNP	17326732	A	A	G	PASS	29417	0.0546624	PASS	27872	0.205714	3.68573e-06	0.00969409	Intergenic	Intergenic
2L_17328205_SNP	17328205	T	T	C	PASS	28850	0.147929	PASS	252109	0.301939	0.00010675	0.0348658	Intergenic	Intergenic
2L_17335471_SNP	17335471	C	C	T	PASS	22312	0.0510638	PASS	22054	0.19708	2.93933e-05	0.0215241	Intergenic	Intergenic
2L_17356412_SNP	17356412	C	C	T	PASS	22623	0.0923695	PASS	23174	0.242623	9.49977e-05	0.033405	FBgn0265445	CR44345	DOWNSTREAM	889
2L_17364290_SNP	17364290	T	T	A	PASS	25658	0.184713	PASS	252132	0.34375	0.00015908	0.0407263	FBgn0051804	CG31804	UTR_3_PRIME
2L_17369020_SNP	17369020	C	C	T	PASS	38839	0.0913349	PASS	32688	0.21256	0.00017375	0.0422433	FBgn0032633	Lrch	INTRON
2L_17374962_SNP	17374962	T	T	C	PASS	236111	0.319885	PASS	205207	0.502427	6.589e-05	0.0290951	FBgn0032633	Lrch	INTRON
2L_17375013_SNP	17375013	G	G	A	PASS	25299	0.282051	PASS	223196	0.46778	3.4045e-05	0.0227497	FBgn0032633	Lrch	INTRON
2L_17385329_SNP	17385329	A	A	T	PASS	31228	0.0823529	PASS	32186	0.211302	9.65954e-05	0.0336114	FBgn0020503	CLIP-190	INTRON
2L_17391329_SNP	17391329	T	T	G	PASS	31623	0.0678466	PASS	30973	0.191099	9.97e-05	0.0339232	FBgn0020503	CLIP-190	INTRON
2L_17391341_SNP	17391341	A	A	T	PASS	31925	0.0726744	PASS	30872	0.189474	0.00023844	0.0477158	FBgn0020503	CLIP-190	INTRON
2L_17392965_SNP	17392965	T	T	C	PASS	34228	0.0756757	PASS	32583	0.203431	6.28256e-05	0.0285966	FBgn0020503	CLIP-190	INTRON
2L_17392977_SNP	17392977	T	T	C	PASS	33229	0.0803324	PASS	34387	0.202326	0.00013655	0.0382795	FBgn0020503	CLIP-190	INTRON
2L_17392990_SNP	17392990	A	A	G	PASS	34232	0.0855615	PASS	30992	0.229426	1.83932e-05	0.0180926	FBgn0020503	CLIP-190	INTRON
2L_17393053_SNP	17393053	G	G	A	PASS	36033	0.0839695	PASS	27477	0.219373	5.32684e-05	0.0270065	FBgn0020503	CLIP-190	INTRON
2L_17393054_SNP	17393054	G	G	A	PASS	36232	0.0812183	PASS	27375	0.215517	5.34165e-05	0.0270065	FBgn0020503	CLIP-190	INTRON
2L_17395892_SNP	17395892	G	G	A	PASS	33228	0.0777778	PASS	30884	0.214286	3.276e-05	0.0223487	FBgn0020503	CLIP-190	INTRON
2L_17397259_SNP	17397259	C	C	G	PASS	23920	0.0772201	PASS	22364	0.222997	7.83065e-05	0.0310155	FBgn0020503	CLIP-190	INTRON
2L_17397672_SNP	17397672	A	A	G	AF	32617	0.0495627	PASS	29762	0.172702	3.75557e-05	0.0234093	FBgn0020503	CLIP-190	INTRON
2L_17397673_SNP	17397673	A	A	T	AF	32517	0.0497076	PASS	29868	0.185792	8.46322e-06	0.0133073	FBgn0020503	CLIP-190	INTRON
2L_17398430_SNP	17398430	G	G	A	PASS	35328	0.0734908	PASS	27668	0.197674	0.00011684	0.0361571	FBgn0020503	CLIP-190	INTRON
2L_17410214_SNP	17410214	A	C	A	PASS	28181	0.223757	PASS	258170	0.397196	4.46228e-05	0.0250786	FBgn0032634	Rpb11	INTRON
2L_17410214_SNP	17410214	A	C	A	PASS	28181	0.223757	PASS	258170	0.397196	4.46228e-05	0.0250786	FBgn0032635	CG15141	UPSTREAM	427
2L_17410214_SNP	17410214	A	C	A	PASS	28181	0.223757	PASS	258170	0.397196	4.46228e-05	0.0250786	FBgn0020503	CLIP-190	DOWNSTREAM	516
2L_17410563_SNP	17410563	A	A	C	PASS	33725	0.0690608	PASS	30974	0.193211	8.09029e-05	0.031433	FBgn0032635	CG15141	UPSTREAM	78
2L_17410563_SNP	17410563	A	A	C	PASS	33725	0.0690608	PASS	30974	0.193211	8.09029e-05	0.031433	FBgn0032634	Rpb11	UPSTREAM	157
2L_17410563_SNP	17410563	A	A	C	PASS	33725	0.0690608	PASS	30974	0.193211	8.09029e-05	0.031433	FBgn0020503	CLIP-190	DOWNSTREAM	865
2L_17424043_SNP	17424043	C	G	C	PASS	23388	0.274143	PASS	173149	0.462733	6.34148e-05	0.0286699	FBgn0011274	Dif	INTRON
2L_17428519_SNP	17428519	A	A	T	PASS	34770	0.167866	PASS	284135	0.322196	6.821e-05	0.0295122	FBgn0011274	Dif	INTRON
2L_17431120_SNP	17431120	G	G	A	PASS	31219	0.0574018	PASS	28870	0.195531	1.39213e-05	0.0161946	FBgn0011274	Dif	INTRON
2L_17431120_SNP	17431120	G	G	A	PASS	31219	0.0574018	PASS	28870	0.195531	1.39213e-05	0.0161946	FBgn0265582	CR44409	DOWNSTREAM	963
2L_17435841_SNP	17435841	A	A	T	PASS	214177	0.452685	PASS	302101	0.25062	3.74655e-06	0.00975559	FBgn0032636	CG5043	DOWNSTREAM	41
2L_17435841_SNP	17435841	A	A	T	PASS	214177	0.452685	PASS	302101	0.25062	3.74655e-06	0.00975559	FBgn0053928	CG33928	DOWNSTREAM	5
2L_17435841_SNP	17435841	A	A	T	PASS	214177	0.452685	PASS	302101	0.25062	3.74655e-06	0.00975559	FBgn0260632	dl	DOWNSTREAM	989
2L_17437905_SNP	17437905	G	G	A	PASS	20543	0.173387	PASS	18097	0.350181	0.00012368	0.0368159	FBgn0260632	dl	DOWNSTREAM	741
2L_17440459_SNP	17440459	C	C	G	PASS	31321	0.0628743	PASS	26765	0.195783	4.15918e-05	0.0243177	FBgn0260632	dl	INTRON
2L_17440782_SNP	17440782	A	T	A	PASS	23447	0.16726	PASS	199101	0.336667	0.00011391	0.0357404	FBgn0260632	dl	INTRON
2L_17443271_SNP	17443271	A	A	G	PASS	34226	0.0706522	PASS	27976	0.214085	1.30662e-05	0.0158078	FBgn0260632	dl	INTRON
2L_17447765_SNP	17447765	A	C	A	PASS	168200	0.543478	PASS	240143	0.373368	0.00024416	0.048088	FBgn0260632	dl	INTRON
2L_17492709_SNP	17492709	A	G	A	PASS	224120	0.348837	PASS	170195	0.534247	8.14349e-05	0.0314946	FBgn0003187	qua	INTRON
2L_17492716_SNP	17492716	A	T	A	PASS	216125	0.366569	PASS	171203	0.542781	0.00018199	0.0429311	FBgn0003187	qua	INTRON
2L_17498264_SNP	17498264	C	C	T	PASS	32434	0.0949721	PASS	24772	0.225705	0.00021362	0.045758	FBgn0032645	CG15142	SYNONYMOUS_CODING
2L_17498264_SNP	17498264	C	C	T	PASS	32434	0.0949721	PASS	24772	0.225705	0.00021362	0.045758	FBgn0267279	CR45715	DOWNSTREAM	567
2L_17498978_SNP	17498978	T	T	G	PASS	30319	0.0590062	PASS	28662	0.178161	0.00013387	0.0379525	FBgn0032645	CG15142	UPSTREAM	157
2L_17498978_SNP	17498978	T	T	G	PASS	30319	0.0590062	PASS	28662	0.178161	0.00013387	0.0379525	FBgn0032646	CG6412	DOWNSTREAM	29
2L_17500400_SNP	17500400	A	A	G	PASS	23482	0.259494	PASS	166152	0.477987	3.99027e-06	0.00986533	FBgn0032646	CG6412	INTRON
2L_17502025_SNP	17502025	T	T	A	PASS	22482	0.267974	PASS	27036	0.117647	0.00012523	0.037037	FBgn0013810	Dhc36C	INTRON
2L_17502025_SNP	17502025	T	T	A	PASS	22482	0.267974	PASS	27036	0.117647	0.00012523	0.037037	FBgn0032646	CG6412	UPSTREAM	919
2L_17502808_SNP	17502808	C	C	A	PASS	22027	0.109312	PASS	20271	0.260073	0.00021835	0.0461163	FBgn0013810	Dhc36C	INTRON
2L_17507753_SNP	17507753	C	C	A	PASS	19222	0.102804	PASS	21080	0.275862	3.66987e-05	0.0232727	FBgn0013810	Dhc36C	SYNONYMOUS_CODING
2L_17509918_SNP	17509918	C	C	T	PASS	24288	0.266667	PASS	216170	0.440415	0.00012267	0.0366934	FBgn0013810	Dhc36C	SYNONYMOUS_CODING
2L_17514357_SNP	17514357	A	A	T	PASS	31625	0.0733138	PASS	28381	0.222527	9.55222e-06	0.0139554	FBgn0013810	Dhc36C	INTRON
2L_17517707_SNP	17517707	C	C	T	PASS	32032	0.0909091	PASS	28585	0.22973	5.92443e-05	0.0278999	FBgn0013810	Dhc36C	INTRON
2L_17525226_SNP	17525226	T	T	C	PASS	29248	0.141176	PASS	21190	0.299003	0.00010081	0.0341015	FBgn0013810	Dhc36C	SYNONYMOUS_CODING
2L_17525226_SNP	17525226	T	T	C	PASS	29248	0.141176	PASS	21190	0.299003	0.00010081	0.0341015	FBgn0032648	CG15144	DOWNSTREAM	359
2L_17525226_SNP	17525226	T	T	C	PASS	29248	0.141176	PASS	21190	0.299003	0.00010081	0.0341015	FBgn0032647	CG15143	UPSTREAM	677
2L_17542088_SNP	17542088	C	C	A	PASS	25235	0.121951	PASS	22497	0.302181	9.69274e-06	0.0140144	FBgn0262996	CR43304	EXON
2L_17548588_SNP	17548588	T	A	T	PASS	29271	0.195592	PASS	253140	0.356234	0.00010966	0.0351407	FBgn0267261	CR45697	DOWNSTREAM	739
2L_17548621_SNP	17548621	A	G	A	PASS	29030	0.09375	PASS	26481	0.234783	8.31936e-05	0.0316936	FBgn0267261	CR45697	DOWNSTREAM	772
2L_17552026_SNP	17552026	A	A	C	PASS	28416	0.0533333	PASS	28170	0.19943	6.56523e-06	0.0120976	Intergenic	Intergenic
2L_17555522_SNP	17555522	T	T	C	PASS	23973	0.233974	PASS	201134	0.4	0.00025589	0.0490146	FBgn0032650	CG7094	SYNONYMOUS_CODING
2L_17569404_SNP	17569404	G	T	G	PASS	27040	0.129032	PASS	23196	0.293578	3.955e-05	0.0238183	Intergenic	Intergenic
2L_17571351_SNP	17571351	A	A	T	PASS	33440	0.106952	PASS	26793	0.258333	2.91253e-05	0.0215171	Intergenic	Intergenic
2L_17574345_SNP	17574345	C	C	T	PASS	20154	0.211765	PASS	183137	0.428125	5.29558e-06	0.0110191	FBgn0262400	mir-287	UPSTREAM	265
2L_17574345_SNP	17574345	C	C	T	PASS	20154	0.211765	PASS	183137	0.428125	5.29558e-06	0.0110191	FBgn0266898	CR45358	DOWNSTREAM	87
2L_1757735_SNP	1757735	A	A	G	PASS	23956	0.189831	PASS	207115	0.357143	0.00015305	0.0401352	FBgn0031365	CG17650	DOWNSTREAM	551
2L_17577696_SNP	17577696	G	G	A	PASS	36326	0.066838	PASS	31598	0.237288	1.96744e-07	0.00300817	Intergenic	Intergenic
2L_1763460_SNP	1763460	A	G	A	PASS	204133	0.394659	PASS	161215	0.571809	0.00018038	0.0428534	Intergenic	Intergenic
2L_1764451_SNP	1764451	C	C	T	PASS	21478	0.267123	PASS	25934	0.116041	0.00014089	0.038752	Intergenic	Intergenic
2L_17645865_SNP	17645865	T	G	T	PASS	24734	0.120996	PASS	23189	0.278125	8.56167e-05	0.0320987	Intergenic	Intergenic
2L_17651265_SNP	17651265	T	T	G	PASS	25340	0.136519	PASS	22089	0.288026	0.00020864	0.0453965	FBgn0015609	CadN	INTRON
2L_1766037_SNP	1766037	A	A	G	PASS	23869	0.224756	PASS	35431	0.0805195	2.8636e-05	0.0214662	Intergenic	Intergenic
2L_1766057_SNP	1766057	C	C	A	PASS	24758	0.190164	PASS	35023	0.0616622	5.86742e-05	0.0278133	Intergenic	Intergenic
2L_17681614_SNP	17681614	C	A	C	PASS	26153	0.16879	PASS	270129	0.323308	0.00015904	0.0407263	FBgn0015609	CadN	INTRON
2L_17746732_SNP	17746732	A	G	A	PASS	24545	0.155172	AF	32113	0.0389222	7.13037e-05	0.0300364	FBgn0015609	CadN	INTRON
2L_17749055_SNP	17749055	A	G	A	PASS	146162	0.525974	PASS	217116	0.348348	0.00025422	0.0488878	FBgn0015609	CadN	INTRON
2L_17750838_SNP	17750838	G	G	T	PASS	26753	0.165625	PASS	247114	0.315789	0.00025578	0.0490075	FBgn0015609	CadN	INTRON
2L_17753058_SNP	17753058	T	G	T	PASS	33654	0.138462	PASS	256101	0.282913	0.00014587	0.0394012	FBgn0015609	CadN	INTRON
2L_17767936_SNP	17767936	A	A	G	PASS	186124	0.4	PASS	136194	0.587879	0.00012432	0.0369402	FBgn0015609	CadN	INTRON
2L_17788732_SNP	17788732	C	T	C	PASS	23219	0.0756972	PASS	23565	0.216667	0.00011046	0.0352167	FBgn0262018	CadN2	INTRON
2L_17798964_SNP	17798964	C	T	C	PASS	22462	0.216783	PASS	175119	0.404762	5.93126e-05	0.0279067	FBgn0262018	CadN2	SYNONYMOUS_CODING
2L_17804009_SNP	17804009	G	G	C	PASS	25375	0.228659	PASS	197144	0.422287	1.85363e-05	0.0181426	FBgn0262018	CadN2	INTRON
2L_17804229_SNP	17804229	A	A	G	PASS	21656	0.205882	PASS	225150	0.4	1.75243e-05	0.0177984	FBgn0262018	CadN2	INTRON
2L_17859429_SNP	17859429	A	A	G	PASS	19432	0.141593	PASS	19993	0.318493	7.04366e-05	0.0299395	FBgn0262018	CadN2	INTRON
2L_17878156_SNP	17878156	T	G	T	PASS	18992	0.327402	PASS	157169	0.518405	0.000107	0.0348658	Intergenic	Intergenic
2L_17884765_SNP	17884765	C	C	T	PASS	28423	0.0749186	PASS	28873	0.202216	0.00013996	0.0386517	Intergenic	Intergenic
2L_17887691_SNP	17887691	C	C	T	PASS	26420	0.0704225	PASS	28778	0.213699	2.79067e-05	0.0213765	Intergenic	Intergenic
2L_17908277_SNP	17908277	T	T	A	PASS	28730	0.0946372	PASS	26980	0.229226	0.00015831	0.040658	Intergenic	Intergenic
2L_17909069_SNP	17909069	C	C	T	PASS	26323	0.0804196	PASS	21970	0.242215	1.44914e-05	0.0164862	Intergenic	Intergenic
2L_17909612_SNP	17909612	C	C	A	PASS	21223	0.0978723	PASS	20568	0.249084	0.00016676	0.041509	Intergenic	Intergenic
2L_17919922_SNP	17919922	C	C	G	PASS	25519	0.0693431	PASS	21568	0.240283	4.06272e-06	0.00988075	FBgn0262963	CR43274	UPSTREAM	791
2L_17919929_SNP	17919929	T	T	A	PASS	25216	0.0597015	PASS	21068	0.244604	6.17259e-07	0.00462332	FBgn0262963	CR43274	UPSTREAM	798
2L_17919934_SNP	17919934	C	C	G	PASS	25516	0.0590406	PASS	21264	0.231884	2.02167e-06	0.00755161	FBgn0262963	CR43274	UPSTREAM	83
2L_17920877_SNP	17920877	G	G	C	PASS	25922	0.0782918	PASS	25367	0.209375	0.00018979	0.0436725	Intergenic	Intergenic
2L_17926114_SNP	17926114	T	C	T	PASS	16729	0.147959	PASS	15689	0.363265	1.02515e-05	0.0141833	Intergenic	Intergenic
2L_17934086_SNP	17934086	G	G	T	PASS	26920	0.0692042	PASS	26273	0.21791	1.797e-05	0.0179636	Intergenic	Intergenic
2L_17934087_SNP	17934087	T	T	G	PASS	26026	0.0909091	PASS	24778	0.24	5.55221e-05	0.0273186	Intergenic	Intergenic
2L_17937597_SNP	17937597	C	C	A	PASS	20021	0.0950226	PASS	16759	0.261062	8.993e-05	0.0326159	Intergenic	Intergenic
2L_1793842_SNP	1793842	A	G	A	PASS	274101	0.269333	PASS	211175	0.453368	3.577e-05	0.0230812	FBgn0045501	Gr22a	INTRON
2L_1793842_SNP	1793842	A	G	A	PASS	274101	0.269333	PASS	211175	0.453368	3.577e-05	0.0230812	FBgn0045500	Gr22b	UPSTREAM	574
2L_17962835_SNP	17962835	C	C	G	PASS	28320	0.0660066	PASS	28766	0.186969	0.00018387	0.0431564	FBgn0023096	btv	NON_SYNONYMOUS_CODING
2L_17962835_SNP	17962835	C	C	G	PASS	28320	0.0660066	PASS	28766	0.186969	0.00018387	0.0431564	FBgn0032656	CG5674	UPSTREAM	544
2L_17967031_SNP	17967031	G	G	A	PASS	31225	0.074184	PASS	26073	0.219219	2.13873e-05	0.0190976	FBgn0023096	btv	NON_SYNONYMOUS_CODING
2L_17967031_SNP	17967031	G	G	A	PASS	31225	0.074184	PASS	26073	0.219219	2.13873e-05	0.0190976	FBgn0032656	CG5674	INTRON
2L_17971985_SNP	17971985	C	C	T	PASS	26630	0.101351	PASS	23678	0.248408	9.963e-05	0.0339067	FBgn0023096	btv	INTRON
2L_17971985_SNP	17971985	C	C	T	PASS	26630	0.101351	PASS	23678	0.248408	9.963e-05	0.0339067	FBgn0032656	CG5674	INTRON
2L_17974524_SNP	17974524	G	G	T	PASS	30731	0.091716	PASS	31891	0.222494	0.00012065	0.0365271	FBgn0032656	CG5674	UTR_3_PRIME
2L_17974524_SNP	17974524	G	G	T	PASS	30731	0.091716	PASS	31891	0.222494	0.00012065	0.0365271	FBgn0023096	btv	INTRON
2L_17976357_SNP	17976357	C	T	C	PASS	30929	0.0857988	PASS	26882	0.234286	2.2954e-05	0.0196241	FBgn0023096	btv	INTRON
2L_17976830_SNP	17976830	G	G	A	PASS	25020	0.0740741	PASS	20757	0.215909	0.00010803	0.0349537	FBgn0023096	btv	SYNONYMOUS_CODING
2L_17978573_SNP	17978573	C	T	C	PASS	31133	0.0959302	PASS	27882	0.227778	0.00016352	0.0412424	FBgn0023096	btv	SYNONYMOUS_CODING
2L_18010281_SNP	18010281	G	G	A	PASS	32733	0.0916667	PASS	27578	0.220963	0.00016674	0.041509	FBgn0032660	elfless	UTR_3_PRIME
2L_18010281_SNP	18010281	G	G	A	PASS	32733	0.0916667	PASS	27578	0.220963	0.00016674	0.041509	FBgn0051740	CG31740	DOWNSTREAM	587
2L_18014097_SNP	18014097	A	C	A	AF	27910	0.0346021	PASS	30779	0.204663	6.32354e-08	0.00206051	FBgn0243486	rdo	INTRON
2L_18021525_SNP	18021525	G	A	G	PASS	34025	0.0684932	PASS	32477	0.19202	7.336e-05	0.0302225	FBgn0243486	rdo	INTRON
2L_18032475_SNP	18032475	T	T	A	PASS	27419	0.0648464	PASS	28168	0.194842	7.98778e-05	0.0312275	FBgn0243486	rdo	INTRON
2L_18047693_SNP	18047693	G	G	A	PASS	28918	0.0586319	PASS	31688	0.217822	1.27159e-06	0.00620196	FBgn0243486	rdo	INTRON
2L_18072734_SNP	18072734	A	A	T	PASS	34433	0.0875332	PASS	30686	0.219388	7.51538e-05	0.0305671	Intergenic	Intergenic
2L_18076372_SNP	18076372	G	G	T	PASS	28194	0.250667	PASS	215162	0.429708	4.85115e-05	0.0260551	Intergenic	Intergenic
2L_18090916_SNP	18090916	G	G	A	PASS	30319	0.0590062	PASS	25763	0.196875	2.437e-05	0.0201844	FBgn0032663	CG15153	UTR_3_PRIME
2L_18098943_SNP	18098943	C	C	A	AF	29615	0.0482315	PASS	26056	0.177215	3.5e-05	0.022945	FBgn0032664	CG5755	DOWNSTREAM	823
2L_18115661_SNP	18115661	G	T	G	PASS	29630	0.0920245	PASS	29288	0.231579	6.68343e-05	0.0291944	FBgn0032665	CG15152	DOWNSTREAM	441
2L_18124764_SNP	18124764	G	G	A	PASS	28425	0.0809061	PASS	26971	0.208824	0.00019401	0.0442019	FBgn0051785	CG31785	SYNONYMOUS_CODING
2L_18124764_SNP	18124764	G	G	A	PASS	28425	0.0809061	PASS	26971	0.208824	0.00019401	0.0442019	FBgn0032666	CG5758	INTRON
2L_18124837_SNP	18124837	C	C	G	PASS	159156	0.495238	PASS	240108	0.310345	9.93882e-05	0.0338629	FBgn0051785	CG31785	NON_SYNONYMOUS_CODING
2L_18124837_SNP	18124837	C	C	G	PASS	159156	0.495238	PASS	240108	0.310345	9.93882e-05	0.0338629	FBgn0032666	CG5758	INTRON
2L_18130598_SNP	18130598	G	G	A	PASS	35339	0.0994898	PASS	30189	0.228205	0.00015472	0.0403111	FBgn0001301	kel	UTR_3_PRIME
2L_18130598_SNP	18130598	G	G	A	PASS	35339	0.0994898	PASS	30189	0.228205	0.00015472	0.0403111	FBgn0032666	CG5758	DOWNSTREAM	736
2L_18131777_SNP	18131777	C	C	T	PASS	30027	0.0825688	PASS	21766	0.233216	3.36914e-05	0.0227095	FBgn0001301	kel	SYNONYMOUS_CODING
2L_1813250_SNP	1813250	G	G	A	PASS	198135	0.405405	PASS	24873	0.227414	8.264e-05	0.0316744	Intergenic	Intergenic
2L_1813254_SNP	1813254	A	A	G	PASS	179139	0.437107	PASS	23873	0.234727	1.34818e-05	0.0159553	Intergenic	Intergenic
2L_1813261_SNP	1813261	G	G	A	PASS	168134	0.443709	PASS	23768	0.222951	2.58814e-06	0.00832708	Intergenic	Intergenic
2L_1813264_SNP	1813264	A	A	C	PASS	167137	0.450658	PASS	22773	0.243333	1.27117e-05	0.0157252	Intergenic	Intergenic
2L_18132905_SNP	18132905	A	T	A	PASS	34538	0.0992167	PASS	29492	0.238342	5.80587e-05	0.0277602	FBgn0001301	kel	INTRON
2L_18134897_SNP	18134897	T	T	C	PASS	29919	0.0597484	PASS	30972	0.188976	4.051e-05	0.0240717	FBgn0001301	kel	INTRON
2L_18134900_SNP	18134900	T	T	A	PASS	30018	0.0566038	PASS	32167	0.17268	0.00012877	0.0374789	FBgn0001301	kel	INTRON
2L_18134902_SNP	18134902	A	A	T	PASS	29918	0.0567823	PASS	31867	0.174026	0.00011822	0.0362837	FBgn0001301	kel	INTRON
2L_18137572_SNP	18137572	G	G	A	PASS	23919	0.0736434	PASS	24064	0.210526	0.00013006	0.0376292	FBgn0001301	kel	SYNONYMOUS_CODING
2L_18149336_SNP	18149336	G	G	A	PASS	33630	0.0819672	PASS	30978	0.20155	0.00022752	0.0469177	FBgn0041184	Socs36E	INTRON
2L_18153911_SNP	18153911	A	A	G	PASS	31627	0.0787172	PASS	28673	0.203343	0.00016511	0.0413855	FBgn0032668	CG17681	NON_SYNONYMOUS_CODING
2L_18153911_SNP	18153911	A	A	G	PASS	31627	0.0787172	PASS	28673	0.203343	0.00016511	0.0413855	FBgn0032669	CG15155	UPSTREAM	94
2L_18156775_SNP	18156775	C	C	T	PASS	32834	0.0939226	PASS	26080	0.235294	6.06342e-05	0.0281309	FBgn0032670	CG5783	SYNONYMOUS_CODING
2L_18156775_SNP	18156775	C	C	T	PASS	32834	0.0939226	PASS	26080	0.235294	6.06342e-05	0.0281309	FBgn0032671	CG7200	DOWNSTREAM	335
2L_18156775_SNP	18156775	C	C	T	PASS	32834	0.0939226	PASS	26080	0.235294	6.06342e-05	0.0281309	FBgn0032669	CG15155	DOWNSTREAM	833
2L_18159274_SNP	18159274	A	A	G	PASS	25525	0.0892857	PASS	23974	0.236422	7.33311e-05	0.0302225	FBgn0032671	CG7200	UPSTREAM	2
2L_18159274_SNP	18159274	A	A	G	PASS	25525	0.0892857	PASS	23974	0.236422	7.33311e-05	0.0302225	FBgn0261804	CG42750	DOWNSTREAM	537
2L_18168887_SNP	18168887	A	A	G	PASS	22370	0.238908	PASS	187135	0.419255	0.00011023	0.0352	FBgn0261804	CG42750	INTRON
2L_18177855_SNP	18177855	G	G	T	PASS	30635	0.102639	PASS	25586	0.252199	4.46569e-05	0.0250885	FBgn0261804	CG42750	INTRON
2L_18178907_SNP	18178907	G	C	G	PASS	28444	0.134146	PASS	23594	0.285714	0.00012598	0.037145	FBgn0261804	CG42750	INTRON
2L_18187802_SNP	18187802	T	T	G	PASS	37528	0.0694789	PASS	31171	0.185864	0.00014599	0.0394116	FBgn0261804	CG42750	INTRON
2L_18191194_SNP	18191194	T	T	C	PASS	30622	0.0670732	PASS	28470	0.19774	5.873e-05	0.0278207	FBgn0261804	CG42750	INTRON
2L_18216980_SNP	18216980	T	T	C	PASS	30338	0.111437	PASS	25986	0.249275	0.00018047	0.0428534	FBgn0261804	CG42750	INTRON
2L_18218111_SNP	18218111	G	G	A	PASS	25623	0.0824373	PASS	28980	0.216802	0.0001235	0.0368049	FBgn0261804	CG42750	INTRON
2L_18236680_SNP	18236680	C	C	A	PASS	34827	0.072	PASS	24560	0.196721	0.0001467	0.0394861	FBgn0261804	CG42750	INTRON
2L_18237728_SNP	18237728	G	G	T	PASS	29421	0.0666667	PASS	26867	0.2	5.68063e-05	0.0274796	FBgn0261804	CG42750	INTRON
2L_18238105_SNP	18238105	A	A	C	PASS	30231	0.0930931	PASS	27981	0.225	0.00015809	0.0406369	FBgn0261804	CG42750	INTRON
2L_18242438_SNP	18242438	G	G	C	PASS	30223	0.0707692	PASS	28469	0.195467	0.00013446	0.0380074	FBgn0261804	CG42750	INTRON
2L_18242690_SNP	18242690	G	G	T	PASS	156188	0.546512	PASS	198116	0.369427	0.00025115	0.0487431	FBgn0261804	CG42750	INTRON
2L_18246452_SNP	18246452	C	C	T	PASS	28835	0.108359	PASS	26890	0.251397	0.00010537	0.0346808	FBgn0261804	CG42750	INTRON
2L_182504_SNP	182504	C	C	A	PASS	36629	0.0734177	PASS	32981	0.197561	6.876e-05	0.0295591	FBgn0016977	spen	INTRON
2L_18251820_SNP	18251820	C	C	G	PASS	30225	0.0764526	PASS	30876	0.197917	0.00019735	0.0444668	FBgn0261804	CG42750	INTRON
2L_18251820_SNP	18251820	C	C	G	PASS	30225	0.0764526	PASS	30876	0.197917	0.00019735	0.0444668	FBgn0263325	CG43406	INTRON
2L_18251970_SNP	18251970	A	A	T	PASS	33032	0.0883978	PASS	28582	0.223433	7.39062e-05	0.0302937	FBgn0261804	CG42750	INTRON
2L_18251970_SNP	18251970	A	A	T	PASS	33032	0.0883978	PASS	28582	0.223433	7.39062e-05	0.0302937	FBgn0263325	CG43406	DOWNSTREAM	61
2L_18251992_SNP	18251992	T	T	C	PASS	31936	0.101408	PASS	27085	0.239437	0.00010593	0.0347483	FBgn0261804	CG42750	INTRON
2L_18251992_SNP	18251992	T	T	C	PASS	31936	0.101408	PASS	27085	0.239437	0.00010593	0.0347483	FBgn0263325	CG43406	DOWNSTREAM	83
2L_18252023_SNP	18252023	T	T	G	PASS	30231	0.0930931	PASS	26078	0.230769	0.000106	0.0347483	FBgn0261804	CG42750	INTRON
2L_18252023_SNP	18252023	T	T	G	PASS	30231	0.0930931	PASS	26078	0.230769	0.000106	0.0347483	FBgn0263325	CG43406	DOWNSTREAM	114
2L_18263968_SNP	18263968	C	C	A	PASS	18295	0.34296	PASS	162178	0.523529	0.00024713	0.0483894	FBgn0261804	CG42750	INTRON
2L_18268458_SNP	18268458	C	C	A	PASS	30125	0.0766871	PASS	26984	0.23796	4.03771e-06	0.00986533	FBgn0261804	CG42750	INTRON
2L_18274368_SNP	18274368	A	G	A	PASS	29426	0.08125	PASS	25871	0.215805	0.00010343	0.034438	FBgn0261804	CG42750	INTRON
2L_18275136_SNP	18275136	T	T	G	PASS	39426	0.0619048	PASS	28672	0.201117	7.9721e-06	0.013044	FBgn0261804	CG42750	INTRON
2L_18278301_SNP	18278301	C	A	C	PASS	32641	0.111717	PASS	320105	0.247059	0.00011992	0.0364972	FBgn0266207	CR44902	DOWNSTREAM	352
2L_18279612_SNP	18279612	C	C	T	PASS	28233	0.104762	PASS	25788	0.255072	5.46736e-05	0.0272062	FBgn0266207	CR44902	UPSTREAM	137
2L_18279817_SNP	18279817	T	T	C	PASS	33337	0.1	PASS	313102	0.245783	2.72988e-05	0.0211358	FBgn0266207	CR44902	UPSTREAM	342
2L_1828394_SNP	1828394	C	C	T	PASS	26562	0.189602	PASS	215121	0.360119	7.93842e-05	0.0312275	Intergenic	Intergenic
2L_18284121_SNP	18284121	C	C	G	PASS	28622	0.0714286	PASS	27267	0.19764	0.00015132	0.0399006	FBgn0051787	CG31787	DOWNSTREAM	724
2L_18293849_SNP	18293849	T	T	A	AF	33217	0.0487106	PASS	28857	0.165217	7.74217e-05	0.0308857	FBgn0263090	CR43358	EXON
2L_18293849_SNP	18293849	T	T	A	AF	33217	0.0487106	PASS	28857	0.165217	7.74217e-05	0.0308857	FBgn0032677	CG5790	UPSTREAM	991
2L_18293869_SNP	18293869	G	G	A	AF	33112	0.0349854	PASS	28251	0.153153	2.57212e-05	0.0205652	FBgn0263090	CR43358	EXON
2L_18293869_SNP	18293869	G	G	A	AF	33112	0.0349854	PASS	28251	0.153153	2.57212e-05	0.0205652	FBgn0032677	CG5790	UPSTREAM	971
2L_1830117_SNP	1830117	C	C	T	PASS	29417	0.0546624	PASS	29261	0.172805	0.00012211	0.0366425	Intergenic	Intergenic
2L_1830934_SNP	1830934	T	C	T	PASS	29035	0.107692	PASS	27794	0.253369	7.21423e-05	0.030113	FBgn0031367	c-cup	DOWNSTREAM	693
2L_1830934_SNP	1830934	T	C	T	PASS	29035	0.107692	PASS	27794	0.253369	7.21423e-05	0.030113	FBgn0262275	mir-2280	DOWNSTREAM	751
2L_1830987_SNP	1830987	T	T	C	AF	31411	0.0338461	PASS	31851	0.138211	9.72722e-05	0.0336809	FBgn0031367	c-cup	DOWNSTREAM	64
2L_1830987_SNP	1830987	T	T	C	AF	31411	0.0338461	PASS	31851	0.138211	9.72722e-05	0.0336809	FBgn0262275	mir-2280	DOWNSTREAM	698
2L_1831475_SNP	1831475	C	C	T	PASS	220111	0.335347	PASS	179192	0.51752	0.00010791	0.0349537	FBgn0031367	c-cup	DOWNSTREAM	152
2L_1831475_SNP	1831475	C	C	T	PASS	220111	0.335347	PASS	179192	0.51752	0.00010791	0.0349537	FBgn0262275	mir-2280	DOWNSTREAM	21
2L_18319432_SNP	18319432	C	C	T	PASS	31739	0.109551	PASS	29697	0.246819	0.00011873	0.0362976	FBgn0000636	Fas3	UPSTREAM	67
2L_18323816_SNP	18323816	C	C	T	PASS	28837	0.113846	PASS	26096	0.269663	3.7538e-05	0.0234093	FBgn0000636	Fas3	INTRON
2L_18325402_SNP	18325402	G	T	G	PASS	25094	0.273256	PASS	209164	0.439678	0.00023436	0.0474646	FBgn0000636	Fas3	INTRON
2L_18333787_SNP	18333787	T	T	C	PASS	38430	0.0724638	PASS	34179	0.188095	0.00013904	0.0385553	FBgn0000636	Fas3	INTRON
2L_18338777_SNP	18338777	T	T	G	PASS	35545	0.1125	PASS	313101	0.243961	0.00015549	0.0403739	FBgn0000636	Fas3	INTRON
2L_18338800_SNP	18338800	C	C	G	PASS	34643	0.11054	PASS	30998	0.240786	0.00018169	0.0428943	FBgn0000636	Fas3	INTRON
2L_1834098_SNP	1834098	C	C	T	PASS	23498	0.295181	PASS	186165	0.470085	0.00017474	0.0423691	Intergenic	Intergenic
2L_1834099_SNP	1834099	A	A	T	PASS	25097	0.279539	PASS	196162	0.452514	0.00015479	0.0403155	Intergenic	Intergenic
2L_18354857_SNP	18354857	G	G	A	PASS	26227	0.0934256	PASS	23675	0.241158	7.61e-05	0.0306698	FBgn0000636	Fas3	INTRON
2L_18354938_SNP	18354938	C	C	T	PASS	23322	0.0862745	PASS	24872	0.225	0.00017257	0.042134	FBgn0000636	Fas3	INTRON
2L_18355405_SNP	18355405	T	T	C	PASS	31721	0.0621302	PASS	31267	0.176781	0.00018345	0.0431087	FBgn0000636	Fas3	INTRON
2L_18355405_SNP	18355405	T	T	C	PASS	31721	0.0621302	PASS	31267	0.176781	0.00018345	0.0431087	FBgn0011559	Acp36DE	DOWNSTREAM	642
2L_1837353_SNP	1837353	G	A	G	PASS	218147	0.40274	PASS	161224	0.581818	0.00011965	0.0364507	FBgn0051665	wry	INTRON
2L_18380717_SNP	18380717	G	G	A	PASS	221135	0.379213	PASS	200246	0.55157	0.00016088	0.040934	FBgn0000636	Fas3	INTRON
2L_18380717_SNP	18380717	G	G	A	PASS	221135	0.379213	PASS	200246	0.55157	0.00016088	0.040934	FBgn0085200	CG34171	DOWNSTREAM	88
2L_18384190_SNP	18384190	C	C	T	PASS	19750	0.202429	PASS	183113	0.381757	0.00014366	0.0391073	FBgn0000636	Fas3	INTRON
2L_18385787_SNP	18385787	A	C	A	PASS	219140	0.389972	PASS	149198	0.570605	0.00013846	0.0384927	FBgn0000636	Fas3	INTRON
2L_18388988_SNP	18388988	T	T	A	PASS	23419	0.0750988	PASS	29477	0.207547	0.00014142	0.0388211	FBgn0000636	Fas3	INTRON
2L_1838976_SNP	1838976	G	G	A	PASS	25845	0.148515	AF	31414	0.0426829	0.00025441	0.0488878	FBgn0051665	wry	INTRON
2L_1838976_SNP	1838976	G	G	A	PASS	25845	0.148515	AF	31414	0.0426829	0.00025441	0.0488878	FBgn0264882	CR44073	DOWNSTREAM	518
2L_18394246_SNP	18394246	A	A	G	PASS	23898	0.291667	PASS	200170	0.459459	0.00026242	0.0495313	FBgn0000636	Fas3	DOWNSTREAM	85
2L_18398477_SNP	18398477	G	G	T	PASS	262134	0.338384	PASS	182189	0.509434	0.00018223	0.0429608	Intergenic	Intergenic
2L_18402939_SNP	18402939	A	C	A	PASS	30150	0.14245	PASS	240117	0.327731	4.02968e-06	0.00986533	Intergenic	Intergenic
2L_18405341_SNP	18405341	C	T	C	PASS	31638	0.107345	PASS	27995	0.254011	4.98748e-05	0.0263638	FBgn0265680	CR44487	DOWNSTREAM	741
2L_18405350_SNP	18405350	T	C	T	PASS	31136	0.103746	PASS	27691	0.247956	6.16577e-05	0.028359	FBgn0265680	CR44487	DOWNSTREAM	75
2L_18430806_SNP	18430806	T	T	C	PASS	20725	0.107759	PASS	17584	0.324324	9.29005e-07	0.00547214	Intergenic	Intergenic
2L_18436327_SNP	18436327	A	A	T	PASS	34433	0.0875332	PASS	30887	0.220253	6.74025e-05	0.0293505	Intergenic	Intergenic
2L_18440180_SNP	18440180	A	A	T	PASS	35523	0.0608466	PASS	28061	0.178886	0.00011825	0.0362839	Intergenic	Intergenic
2L_18441558_SNP	18441558	A	A	T	PASS	30525	0.0757576	PASS	30075	0.2	0.00014935	0.0396584	FBgn0261597	RpS26	DOWNSTREAM	477
2L_18443986_SNP	18443986	G	G	A	PASS	34631	0.0822281	PASS	26771	0.210059	0.00013009	0.0376292	FBgn0086707	ncm	DOWNSTREAM	521
2L_18443986_SNP	18443986	G	G	A	PASS	34631	0.0822281	PASS	26771	0.210059	0.00013009	0.0376292	FBgn0261597	RpS26	UPSTREAM	79
2L_18449144_SNP	18449144	C	C	A	PASS	33929	0.0788043	PASS	31889	0.218673	2.02986e-05	0.0187348	FBgn0086707	ncm	UPSTREAM	187
2L_18449144_SNP	18449144	C	C	A	PASS	33929	0.0788043	PASS	31889	0.218673	2.02986e-05	0.0187348	FBgn0032679	bsf	DOWNSTREAM	373
2L_18453145_SNP	18453145	G	G	A	PASS	25416	0.0592593	PASS	24168	0.220065	4.71891e-06	0.0104957	FBgn0032679	bsf	SYNONYMOUS_CODING
2L_18458804_SNP	18458804	G	G	T	PASS	28121	0.0695364	PASS	25771	0.216463	2.01785e-05	0.0186955	FBgn0263049	let-7-C	INTRON
2L_1846216_SNP	1846216	T	T	C	PASS	21897	0.307937	PASS	30454	0.150838	0.00010691	0.0348658	FBgn0051665	wry	INTRON
2L_18468354_SNP	18468354	A	A	C	PASS	28827	0.0857143	PASS	28283	0.227397	5.02383e-05	0.02642	FBgn0263049	let-7-C	INTRON
2L_18471956_SNP	18471956	C	C	T	PASS	38226	0.0637255	PASS	33986	0.202353	6.03892e-06	0.011707	FBgn0263049	let-7-C	EXON
2L_18471956_SNP	18471956	C	C	T	PASS	38226	0.0637255	PASS	33986	0.202353	6.03892e-06	0.011707	FBgn0262406	let-7	UPSTREAM	78
2L_18471956_SNP	18471956	C	C	T	PASS	38226	0.0637255	PASS	33986	0.202353	6.03892e-06	0.011707	FBgn0262456	mir-125	UPSTREAM	359
2L_18471956_SNP	18471956	C	C	T	PASS	38226	0.0637255	PASS	33986	0.202353	6.03892e-06	0.011707	FBgn0262463	mir-100	DOWNSTREAM	423
2L_18472130_SNP	18472130	A	A	T	PASS	30439	0.113703	PASS	284103	0.26615	3.54352e-05	0.0230439	FBgn0263049	let-7-C	EXON
2L_18472130_SNP	18472130	A	A	T	PASS	30439	0.113703	PASS	284103	0.26615	3.54352e-05	0.0230439	FBgn0262406	let-7	DOWNSTREAM	19
2L_18472130_SNP	18472130	A	A	T	PASS	30439	0.113703	PASS	284103	0.26615	3.54352e-05	0.0230439	FBgn0262456	mir-125	UPSTREAM	185
2L_18472130_SNP	18472130	A	A	T	PASS	30439	0.113703	PASS	284103	0.26615	3.54352e-05	0.0230439	FBgn0262463	mir-100	DOWNSTREAM	597
2L_18472130_SNP	18472130	A	A	T	PASS	30439	0.113703	PASS	284103	0.26615	3.54352e-05	0.0230439	FBgn0032681	CG10283	DOWNSTREAM	834
2L_18472160_SNP	18472160	A	A	C	PASS	32547	0.126344	PASS	282107	0.275064	6.18164e-05	0.028359	FBgn0263049	let-7-C	EXON
2L_18472160_SNP	18472160	A	A	C	PASS	32547	0.126344	PASS	282107	0.275064	6.18164e-05	0.028359	FBgn0262406	let-7	DOWNSTREAM	49
2L_18472160_SNP	18472160	A	A	C	PASS	32547	0.126344	PASS	282107	0.275064	6.18164e-05	0.028359	FBgn0262456	mir-125	UPSTREAM	155
2L_18472160_SNP	18472160	A	A	C	PASS	32547	0.126344	PASS	282107	0.275064	6.18164e-05	0.028359	FBgn0262463	mir-100	DOWNSTREAM	627
2L_18472160_SNP	18472160	A	A	C	PASS	32547	0.126344	PASS	282107	0.275064	6.18164e-05	0.028359	FBgn0032681	CG10283	DOWNSTREAM	84
2L_18474361_SNP	18474361	T	T	C	PASS	32323	0.066474	PASS	25663	0.197492	6.29742e-05	0.0286099	FBgn0032681	CG10283	SYNONYMOUS_CODING
2L_18476953_SNP	18476953	C	C	T	PASS	24364	0.208469	PASS	29826	0.0802469	0.00020831	0.0453965	FBgn0032681	CG10283	INTRON
2L_18477447_SNP	18477447	G	G	A	PASS	183116	0.38796	PASS	173227	0.5675	0.00017549	0.0424041	FBgn0032681	CG10283	INTRON
2L_18477457_SNP	18477457	G	A	G	PASS	122188	0.606452	PASS	237167	0.413366	4.83136e-05	0.0260551	FBgn0032681	CG10283	INTRON
2L_1847903_SNP	1847903	G	C	G	PASS	21688	0.289474	PASS	32245	0.122616	1.98161e-05	0.0186136	FBgn0051665	wry	INTRON
2L_18491658_SNP	18491658	G	G	T	PASS	30224	0.0736196	PASS	28976	0.208219	5.204e-05	0.0268071	FBgn0032683	kon	SYNONYMOUS_CODING
2L_18496213_SNP	18496213	G	T	G	PASS	25183	0.248503	PASS	225164	0.421594	0.00010125	0.0341128	FBgn0032683	kon	INTRON
2L_1850849_SNP	1850849	A	A	G	PASS	32235	0.0980392	PASS	27290	0.248619	2.47132e-05	0.0202534	FBgn0051665	wry	INTRON
2L_18511875_SNP	18511875	C	C	A	PASS	38824	0.0582524	PASS	35877	0.177011	4.024e-05	0.0240453	FBgn0032684	CG10178	NON_SYNONYMOUS_CODING
2L_18515132_SNP	18515132	G	A	G	PASS	220116	0.345238	PASS	172188	0.522222	0.00017951	0.0428011	Intergenic	Intergenic
2L_18515137_SNP	18515137	A	T	A	PASS	209119	0.362805	PASS	164191	0.538028	0.0002407	0.0478357	Intergenic	Intergenic
2L_18516397_SNP	18516397	G	G	A	PASS	27421	0.0711864	PASS	30372	0.192	0.00022589	0.0468155	Intergenic	Intergenic
2L_18521040_SNP	18521040	G	G	T	PASS	31124	0.0716418	PASS	27271	0.206997	4.74645e-05	0.0259056	FBgn0032685	CG10211	INTRON
2L_18526701_SNP	18526701	T	T	C	PASS	26526	0.0893471	PASS	25473	0.223242	0.00019974	0.0446928	FBgn0032685	CG10211	INTRON
2L_18526810_SNP	18526810	T	T	A	PASS	33031	0.0858726	PASS	28981	0.218919	7.98585e-05	0.0312275	FBgn0032685	CG10211	INTRON
2L_18533937_SNP	18533937	T	T	A	PASS	21718	0.0765957	PASS	19461	0.239216	3.22823e-05	0.0221405	FBgn0085370	Pde11	NON_SYNONYMOUS_CODING
2L_18534001_SNP	18534001	T	T	G	PASS	15636	0.1875	PASS	14296	0.403361	2.77423e-05	0.0213409	FBgn0085370	Pde11	SYNONYMOUS_CODING
2L_1853760_SNP	1853760	T	T	G	PASS	182170	0.482955	PASS	284121	0.298765	4.902e-05	0.0261969	FBgn0051665	wry	INTRON
2L_18549766_SNP	18549766	C	C	T	PASS	28319	0.0629139	PASS	26566	0.199396	3.91588e-05	0.0237888	FBgn0085370	Pde11	INTRON
2L_18572556_SNP	18572556	C	C	T	PASS	221152	0.407507	PASS	31799	0.237981	7.74843e-05	0.0308865	FBgn0085370	Pde11	INTRON
2L_18577000_SNP	18577000	A	A	T	PASS	35132	0.0835509	PASS	31380	0.203562	0.00020335	0.0450212	FBgn0085370	Pde11	INTRON
2L_18577241_SNP	18577241	A	C	A	PASS	26173	0.218563	PASS	238152	0.389744	7.9442e-05	0.0312275	FBgn0085370	Pde11	INTRON
2L_18578694_SNP	18578694	C	C	T	PASS	30127	0.0823171	PASS	29778	0.208	0.00017631	0.0425026	FBgn0085370	Pde11	INTRON
2L_18581339_SNP	18581339	C	C	A	PASS	20715	0.0675676	PASS	19251	0.209877	0.00016607	0.0414716	FBgn0085370	Pde11	INTRON
2L_18585625_SNP	18585625	A	A	G	PASS	36732	0.0802005	PASS	30499	0.245658	9.03649e-07	0.00536404	FBgn0085370	Pde11	INTRON
2L_18592371_SNP	18592371	T	T	C	PASS	29018	0.0584416	PASS	31068	0.179894	9.506e-05	0.033405	FBgn0032688	CG15160	INTRON
2L_18592376_SNP	18592376	C	C	T	PASS	31019	0.0577508	PASS	32868	0.171717	0.00015009	0.0397398	FBgn0032688	CG15160	INTRON
2L_18592382_SNP	18592382	C	C	A	PASS	31021	0.0634441	PASS	32971	0.1775	0.00019637	0.0444131	FBgn0032688	CG15160	INTRON
2L_18612415_SNP	18612415	C	C	A	PASS	36228	0.0717949	PASS	28472	0.202247	4.78831e-05	0.0259435	FBgn0032691	Atac2	UPSTREAM	166
2L_18621608_SNP	18621608	T	T	A	PASS	31330	0.0874636	PASS	24189	0.269697	7.83548e-07	0.00497921	FBgn0032694	MESR3	INTRON
2L_18623796_SNP	18623796	G	G	C	PASS	27782	0.228412	PASS	191124	0.393651	0.0002133	0.0457578	FBgn0032694	MESR3	INTRON
2L_18628040_SNP	18628040	T	T	A	PASS	23650	0.174825	PASS	18799	0.346154	0.00012233	0.0366425	FBgn0032694	MESR3	INTRON
2L_18628060_SNP	18628060	G	G	A	PASS	22974	0.244224	PASS	181131	0.419872	0.00016986	0.0419218	FBgn0032694	MESR3	INTRON
2L_18629852_SNP	18629852	G	G	T	PASS	31519	0.0568862	PASS	26670	0.208333	3.66402e-06	0.00969253	FBgn0032694	MESR3	INTRON
2L_18648474_SNP	18648474	C	C	T	PASS	35734	0.0869565	PASS	32291	0.220339	4.97122e-05	0.0263413	FBgn0032694	MESR3	INTRON
2L_18653408_SNP	18653408	A	C	A	PASS	27270	0.204678	PASS	245139	0.361979	0.00020867	0.0453965	FBgn0032694	MESR3	INTRON
2L_18653408_SNP	18653408	A	C	A	PASS	27270	0.204678	PASS	245139	0.361979	0.00020867	0.0453965	FBgn0032693	Cyp310a1	UPSTREAM	398
2L_18653416_SNP	18653416	T	A	T	PASS	26770	0.207715	PASS	250146	0.368687	0.00015492	0.0403314	FBgn0032694	MESR3	INTRON
2L_18653416_SNP	18653416	T	A	T	PASS	26770	0.207715	PASS	250146	0.368687	0.00015492	0.0403314	FBgn0032693	Cyp310a1	UPSTREAM	46
2L_18663034_SNP	18663034	A	A	G	PASS	29742	0.123894	PASS	23489	0.275542	8.97546e-05	0.0326045	Intergenic	Intergenic
2L_18664834_SNP	18664834	T	A	T	PASS	263135	0.339196	PASS	172217	0.557841	1.65142e-06	0.00702656	FBgn0086200	CR42490	UPSTREAM	298
2L_18672180_SNP	18672180	T	T	C	PASS	29897	0.24557	PASS	220157	0.416446	8.33515e-05	0.0317225	FBgn0263078	CG43339	SYNONYMOUS_CODING
2L_18672180_SNP	18672180	T	T	C	PASS	29897	0.24557	PASS	220157	0.416446	8.33515e-05	0.0317225	FBgn0263079	CG43338	UPSTREAM	934
2L_18672189_SNP	18672189	C	C	T	PASS	30696	0.238806	PASS	240157	0.395466	0.00022754	0.0469177	FBgn0263078	CG43339	SYNONYMOUS_CODING
2L_18672189_SNP	18672189	C	C	T	PASS	30696	0.238806	PASS	240157	0.395466	0.00022754	0.0469177	FBgn0263079	CG43338	UPSTREAM	943
2L_18677596_SNP	18677596	A	A	C	PASS	22679	0.259016	PASS	176158	0.473054	5.80424e-06	0.0115252	FBgn0086909	CG31751	INTRON
2L_18677596_SNP	18677596	A	A	C	PASS	22679	0.259016	PASS	176158	0.473054	5.80424e-06	0.0115252	FBgn0086681	Mst36Fa	UPSTREAM	598
2L_18730269_SNP	18730269	G	G	A	PASS	35436	0.0923077	PASS	31399	0.240291	1.325e-05	0.0158661	FBgn0032707	CG10348	INTRON
2L_18730803_SNP	18730803	G	G	T	PASS	30731	0.091716	PASS	29887	0.225974	9.793e-05	0.0337652	FBgn0032707	CG10348	INTRON
2L_18730805_SNP	18730805	T	T	A	PASS	29731	0.0945122	PASS	28785	0.228495	0.00013188	0.0377559	FBgn0032707	CG10348	INTRON
2L_18730818_SNP	18730818	G	G	T	PASS	31032	0.0935673	PASS	29385	0.224868	0.00014276	0.0389976	FBgn0032707	CG10348	INTRON
2L_18732227_SNP	18732227	T	T	C	PASS	34940	0.102828	PASS	310102	0.247573	3.024e-05	0.0216284	FBgn0265993	CR44768	UPSTREAM	237
2L_18732227_SNP	18732227	T	T	C	PASS	34940	0.102828	PASS	310102	0.247573	3.024e-05	0.0216284	FBgn0032707	CG10348	UPSTREAM	88
2L_18735552_SNP	18735552	C	A	C	PASS	29143	0.128743	PASS	24189	0.269697	0.00026414	0.0496995	FBgn0265994	CR44769	UPSTREAM	196
2L_18737312_SNP	18737312	G	G	A	PASS	33439	0.104558	PASS	28791	0.240741	0.00010792	0.0349537	Intergenic	Intergenic
2L_1873969_SNP	1873969	A	A	G	PASS	157152	0.491909	PASS	269122	0.31202	0.00012282	0.0367084	FBgn0051663	CG31663	INTRON
2L_1873969_SNP	1873969	A	A	G	PASS	157152	0.491909	PASS	269122	0.31202	0.00012282	0.0367084	FBgn0264884	CR44075	DOWNSTREAM	458
2L_18742328_SNP	18742328	C	C	T	PASS	29725	0.0776397	PASS	294103	0.259446	2.87659e-07	0.00350405	Intergenic	Intergenic
2L_1874285_SNP	1874285	C	C	T	PASS	155163	0.512579	PASS	225112	0.332344	0.00017373	0.0422433	FBgn0051663	CG31663	INTRON
2L_1874285_SNP	1874285	C	C	T	PASS	155163	0.512579	PASS	225112	0.332344	0.00017373	0.0422433	FBgn0264884	CR44075	DOWNSTREAM	774
2L_18761378_SNP	18761378	C	C	T	PASS	26942	0.135048	PASS	24596	0.281525	0.00021188	0.0456247	Intergenic	Intergenic
2L_18762282_SNP	18762282	G	A	G	PASS	224107	0.323263	PASS	166175	0.513196	6.45351e-05	0.0288907	FBgn0045852	ham	DOWNSTREAM	592
2L_18791295_SNP	18791295	C	T	C	PASS	182222	0.549505	PASS	264154	0.368421	6.00061e-05	0.0279913	FBgn0045852	ham	INTRON
2L_18808776_SNP	18808776	A	T	A	PASS	31364	0.169761	PASS	271131	0.325871	8.565e-05	0.0320987	FBgn0260228	CG42502	UTR_3_PRIME
2L_18808776_SNP	18808776	A	T	A	PASS	31364	0.169761	PASS	271131	0.325871	8.565e-05	0.0320987	FBgn0040992	CG10570	UTR_3_PRIME
2L_18808778_SNP	18808778	C	T	C	PASS	30363	0.172131	PASS	271129	0.3225	0.00016607	0.0414716	FBgn0040992	CG10570	UTR_3_PRIME
2L_18808778_SNP	18808778	C	T	C	PASS	30363	0.172131	PASS	271129	0.3225	0.00016607	0.0414716	FBgn0260228	CG42502	UTR_3_PRIME
2L_18814310_SNP	18814310	T	T	C	PASS	35623	0.060686	PASS	33477	0.187348	2.76872e-05	0.0213292	FBgn0040993	CG17325	DOWNSTREAM	369
2L_18814310_SNP	18814310	T	T	C	PASS	35623	0.060686	PASS	33477	0.187348	2.76872e-05	0.0213292	FBgn0259201	CG42305	DOWNSTREAM	369
2L_18817716_SNP	18817716	A	A	G	PASS	34830	0.0793651	PASS	29673	0.197832	0.0002349	0.0475034	Intergenic	Intergenic
2L_18819176_SNP	18819176	G	G	A	PASS	37738	0.0915663	PASS	323102	0.24	9.16523e-06	0.0137273	FBgn0027074	CG17324	UPSTREAM	168
2L_18821372_SNP	18821372	T	T	G	PASS	35733	0.0846154	PASS	323121	0.272523	5.48553e-08	0.00204735	FBgn0027074	CG17324	INTRON
2L_18821544_SNP	18821544	A	A	T	PASS	32133	0.0932203	PASS	29284	0.223404	0.00014592	0.039402	FBgn0027074	CG17324	INTRON
2L_18822870_SNP	18822870	T	T	A	PASS	37347	0.111905	PASS	308105	0.254237	4.495e-05	0.0252023	FBgn0027074	CG17324	DOWNSTREAM	297
2L_18822870_SNP	18822870	T	T	A	PASS	37347	0.111905	PASS	308105	0.254237	4.495e-05	0.0252023	FBgn0032713	CG17323	UPSTREAM	678
2L_18823026_SNP	18823026	T	T	A	PASS	35154	0.133333	PASS	312113	0.265882	0.00024057	0.0478217	FBgn0027074	CG17324	DOWNSTREAM	453
2L_18823026_SNP	18823026	T	T	A	PASS	35154	0.133333	PASS	312113	0.265882	0.00024057	0.0478217	FBgn0032713	CG17323	UPSTREAM	522
2L_18825858_SNP	18825858	G	A	G	PASS	126176	0.582781	PASS	190120	0.387097	8.11114e-05	0.0314495	FBgn0032713	CG17323	SYNONYMOUS_CODING
2L_18825858_SNP	18825858	G	A	G	PASS	126176	0.582781	PASS	190120	0.387097	8.11114e-05	0.0314495	FBgn0027070	CG17322	UPSTREAM	912
2L_18848488_SNP	18848488	A	A	C	PASS	28732	0.100313	PASS	22888	0.278481	3.60373e-06	0.0096656	FBgn0032719	CG17321	INTRON
2L_18848491_SNP	18848491	T	T	A	PASS	30833	0.0967742	PASS	23794	0.283988	7.4904e-07	0.00486618	FBgn0032719	CG17321	INTRON
2L_18856233_SNP	18856233	G	G	A	PASS	31535	0.1	PASS	26186	0.247839	4.22346e-05	0.0245339	FBgn0032721	CG10602	SYNONYMOUS_CODING
2L_18856338_SNP	18856338	G	G	A	PASS	29419	0.0607029	PASS	24259	0.196013	4.584e-05	0.025396	FBgn0032721	CG10602	SYNONYMOUS_CODING
2L_18863611_SNP	18863611	C	C	T	PASS	32132	0.0906516	PASS	27378	0.222222	0.00013643	0.0382681	FBgn0003896	tup	INTRON
2L_18863897_SNP	18863897	G	G	A	PASS	29337	0.112121	PASS	25999	0.276536	1.41e-05	0.0162976	FBgn0003896	tup	INTRON
2L_18870310_SNP	18870310	G	T	G	PASS	229149	0.39418	PASS	164223	0.576227	8.27211e-05	0.0316797	FBgn0003896	tup	INTRON
2L_18878160_SNP	18878160	G	G	A	PASS	315105	0.25	PASS	244177	0.420428	5.97043e-05	0.0279457	FBgn0003896	tup	INTRON
2L_18889590_SNP	18889590	G	G	A	PASS	35936	0.0911392	PASS	28695	0.249344	4.91426e-06	0.0107057	Intergenic	Intergenic
2L_18891418_SNP	18891418	G	A	G	PASS	33139	0.105405	PASS	24682	0.25	7.231e-05	0.0301266	Intergenic	Intergenic
2L_18892450_SNP	18892450	T	A	T	PASS	225104	0.316109	PASS	193186	0.490765	0.00017659	0.0425344	Intergenic	Intergenic
2L_18892526_SNP	18892526	A	C	T	PASS	31030	0.0882353	PASS	33290	0.21327	0.00017091	0.0419981	Intergenic	Intergenic
2L_18900969_SNP	18900969	G	G	A	PASS	36028	0.072165	PASS	32478	0.19403	9.046e-05	0.0327127	FBgn0265952	CR44739	UPSTREAM	475
2L_18908366_SNP	18908366	G	G	T	PASS	33045	0.12	PASS	272107	0.282322	1.32049e-05	0.0158612	Intergenic	Intergenic
2L_1891196_SNP	1891196	A	A	T	PASS	32690	0.216346	PASS	37440	0.0966184	0.00026247	0.0495338	FBgn0031374	CG7337	INTRON
2L_18914119_SNP	18914119	G	G	T	PASS	32953	0.138743	PASS	300124	0.292453	4.12578e-05	0.0242117	Intergenic	Intergenic
2L_18919528_SNP	18919528	G	G	A	PASS	36153	0.128019	PASS	291106	0.267003	0.00012337	0.036781	FBgn0032723	ssp3	INTRON
2L_18919548_SNP	18919548	A	A	G	PASS	272116	0.298969	PASS	31558	0.155496	0.00022093	0.046349	FBgn0032723	ssp3	INTRON
2L_1893061_SNP	1893061	C	T	C	PASS	163149	0.477564	PASS	238102	0.3	0.00018316	0.0430908	FBgn0031374	CG7337	INTRON
2L_18939692_SNP	18939692	A	G	A	PASS	28764	0.182336	PASS	35723	0.0605263	7.11741e-05	0.0300334	FBgn0032723	ssp3	SYNONYMOUS_CODING
2L_18953962_SNP	18953962	G	G	C	PASS	248125	0.335121	PASS	181211	0.538265	9.61709e-06	0.0140044	FBgn0032726	CG10621	INTRON
2L_18953962_SNP	18953962	G	G	C	PASS	248125	0.335121	PASS	181211	0.538265	9.61709e-06	0.0140044	FBgn0265954	CR44741	UPSTREAM	622
2L_18962225_SNP	18962225	C	A	C	PASS	31249	0.135734	PASS	290112	0.278607	0.00014271	0.0389935	FBgn0015772	Nak	INTRON
2L_18963743_SNP	18963743	G	A	G	PASS	25195	0.274566	PASS	202160	0.441989	0.00023015	0.0470739	FBgn0015772	Nak	INTRON
2L_18966760_SNP	18966760	T	T	C	PASS	26450	0.159236	AF	36517	0.0445026	7.23359e-05	0.0301266	FBgn0015772	Nak	INTRON
2L_18967663_SNP	18967663	C	C	T	AF	36912	0.0314961	PASS	29943	0.125731	0.00020301	0.0450132	FBgn0015772	Nak	INTRON
2L_18970035_SNP	18970035	A	A	T	PASS	29099	0.254499	PASS	218160	0.42328	0.00011504	0.0359273	FBgn0032728	Tango6	NON_SYNONYMOUS_CODING
2L_18970161_SNP	18970161	A	A	G	PASS	29853	0.150997	PASS	282123	0.303704	8.9591e-05	0.0325895	FBgn0032728	Tango6	SYNONYMOUS_CODING
2L_18970527_SNP	18970527	G	G	C	PASS	28078	0.217877	PASS	242167	0.408313	9.19096e-06	0.0137273	FBgn0032728	Tango6	NON_SYNONYMOUS_CODING
2L_18971760_SNP	18971760	C	G	C	PASS	27596	0.25876	PASS	242175	0.419664	0.00021368	0.045758	FBgn0032728	Tango6	SYNONYMOUS_CODING
2L_18971760_SNP	18971760	C	G	C	PASS	27596	0.25876	PASS	242175	0.419664	0.00021368	0.045758	FBgn0032729	CG10639	DOWNSTREAM	233
2L_18978622_SNP	18978622	C	T	C	PASS	24064	0.210526	PASS	214132	0.381503	0.000123	0.0367343	FBgn0032731	Swip-1	SYNONYMOUS_CODING
2L_18978622_SNP	18978622	C	T	C	PASS	24064	0.210526	PASS	214132	0.381503	0.000123	0.0367343	FBgn0032730	CG10431	DOWNSTREAM	435
2L_18985388_SNP	18985388	T	C	T	PASS	218100	0.314465	PASS	193184	0.488064	0.00021014	0.0454929	FBgn0032731	Swip-1	INTRON
2L_18991657_SNP	18991657	G	G	T	PASS	23231	0.117871	PASS	23283	0.263492	0.00026152	0.0494396	FBgn0032734	CG15169	NON_SYNONYMOUS_CODING
2L_18992266_SNP	18992266	A	C	A	PASS	240138	0.365079	PASS	159209	0.567935	1.29817e-05	0.0157662	FBgn0032734	CG15169	UTR_3_PRIME
2L_18993594_SNP	18993594	T	T	C	PASS	38765	0.143805	PASS	332132	0.284483	9.315e-05	0.0331677	FBgn0046302	CG10650	DOWNSTREAM	23
2L_18993789_SNP	18993789	C	C	T	PASS	24283	0.255385	PASS	171129	0.43	0.00019359	0.0441659	FBgn0046302	CG10650	SYNONYMOUS_CODING
2L_18995283_SNP	18995283	C	C	A	PASS	30948	0.134454	PASS	265117	0.306283	9.37291e-06	0.0138557	FBgn0046302	CG10650	INTRON
2L_18995284_SNP	18995284	A	A	T	PASS	30248	0.137143	PASS	260117	0.310345	9.89207e-06	0.0140144	FBgn0046302	CG10650	INTRON
2L_18995297_SNP	18995297	A	A	T	PASS	30752	0.144847	PASS	256126	0.329843	3.28791e-06	0.00934282	FBgn0046302	CG10650	INTRON
2L_18995554_SNP	18995554	C	C	T	PASS	27050	0.15625	PASS	267129	0.325758	2.89587e-05	0.0215171	FBgn0046302	CG10650	INTRON
2L_18996148_SNP	18996148	A	A	G	PASS	23849	0.170732	PASS	211111	0.34472	6.5157e-05	0.0289296	FBgn0046302	CG10650	UPSTREAM	214
2L_19000352_SNP	19000352	C	C	G	PASS	25628	0.0985916	PASS	22273	0.247458	0.00010097	0.0341116	FBgn0051792	CG31792	NON_SYNONYMOUS_CODING
2L_19007152_SNP	19007152	T	T	G	PASS	27572	0.207493	PASS	194117	0.376206	0.00013263	0.0378202	FBgn0051793	CG31793	NON_SYNONYMOUS_CODING
2L_19007152_SNP	19007152	T	T	G	PASS	27572	0.207493	PASS	194117	0.376206	0.00013263	0.0378202	FBgn0086710	RpL30	DOWNSTREAM	879
2L_19007850_SNP	19007850	C	C	G	PASS	25892	0.262857	PASS	31845	0.123967	0.00020083	0.0447556	FBgn0051793	CG31793	NON_SYNONYMOUS_CODING
2L_19007850_SNP	19007850	C	C	G	PASS	25892	0.262857	PASS	31845	0.123967	0.00020083	0.0447556	FBgn0086710	RpL30	DOWNSTREAM	181
2L_19007850_SNP	19007850	C	C	G	PASS	25892	0.262857	PASS	31845	0.123967	0.00020083	0.0447556	FBgn0086039	snoRNA:Me28S-A2113	DOWNSTREAM	761
2L_19011686_SNP	19011686	G	G	C	PASS	27238	0.122581	PASS	21679	0.267797	0.00023948	0.0477781	FBgn0028569	robl37BC	DOWNSTREAM	154
2L_19011686_SNP	19011686	G	G	C	PASS	27238	0.122581	PASS	21679	0.267797	0.00023948	0.0477781	FBgn0266830	CR45292	UPSTREAM	216
2L_19017535_SNP	19017535	T	A	T	PASS	22322	0.0897959	PASS	22469	0.235495	0.00014818	0.0395246	Intergenic	Intergenic
2L_19036580_SNP	19036580	T	T	C	AF	28211	0.0375427	PASS	28764	0.182336	2.29729e-06	0.00794189	FBgn0086442	mib2	INTRON
2L_19041729_SNP	19041729	G	G	A	PASS	33840	0.10582	PASS	29493	0.24031	0.00012211	0.0366425	FBgn0002022	Catsup	UPSTREAM	133
2L_19041729_SNP	19041729	G	G	A	PASS	33840	0.10582	PASS	29493	0.24031	0.00012211	0.0366425	FBgn0086442	mib2	DOWNSTREAM	188
2L_1905108_SNP	1905108	C	C	A	PASS	26282	0.238372	PASS	209150	0.417827	5.74452e-05	0.0275891	FBgn0031374	CG7337	INTRON
2L_1905112_SNP	1905112	T	T	G	PASS	26879	0.227666	PASS	215150	0.410959	3.258e-05	0.0222755	FBgn0031374	CG7337	INTRON
2L_1905125_SNP	1905125	G	G	T	PASS	27780	0.22409	PASS	211133	0.386628	0.00020602	0.0452041	FBgn0031374	CG7337	INTRON
2L_1905137_SNP	1905137	G	G	C	PASS	26367	0.20303	PASS	207123	0.372727	0.00011021	0.0352	FBgn0031374	CG7337	INTRON
2L_19052963_SNP	19052963	C	T	C	PASS	29422	0.0696202	PASS	24768	0.215873	2.1276e-05	0.0190549	FBgn0261396	Rpn3	SYNONYMOUS_CODING
2L_19057439_SNP	19057439	G	G	A	PASS	22417	0.0705394	PASS	22561	0.213287	9.46312e-05	0.0333437	FBgn0032748	CG10492	SYNONYMOUS_CODING
2L_19059918_SNP	19059918	A	A	T	PASS	29217	0.0550162	PASS	23955	0.187075	5.02337e-05	0.02642	FBgn0032749	Phlpp	INTRON
2L_19061559_SNP	19061559	G	G	A	PASS	27930	0.0970874	PASS	21868	0.237762	0.00017301	0.042193	FBgn0032749	Phlpp	NON_SYNONYMOUS_CODING
2L_19077516_SNP	19077516	C	C	A	PASS	165142	0.462541	PASS	258102	0.283333	0.00012883	0.0374789	FBgn0032754	CG10700	NON_SYNONYMOUS_CODING
2L_19077525_SNP	19077525	A	A	T	PASS	167140	0.456026	PASS	25796	0.271955	8.11537e-05	0.0314495	FBgn0032754	CG10700	NON_SYNONYMOUS_CODING
2L_19088539_SNP	19088539	A	A	G	PASS	34531	0.0824468	PASS	29375	0.203804	0.00020476	0.0451104	FBgn0002023	Lim3	INTRON
2L_19088607_SNP	19088607	A	A	G	PASS	287104	0.265985	PASS	218165	0.430809	0.00017559	0.0424149	FBgn0002023	Lim3	INTRON
2L_19088618_SNP	19088618	T	T	A	PASS	34231	0.0831099	PASS	30382	0.212987	8.12279e-05	0.0314575	FBgn0002023	Lim3	INTRON
2L_19088686_SNP	19088686	G	G	A	PASS	26495	0.264624	PASS	211181	0.461735	1.07334e-05	0.0144564	FBgn0002023	Lim3	INTRON
2L_19088697_SNP	19088697	A	A	T	PASS	26292	0.259887	PASS	214165	0.435356	8.54429e-05	0.0320879	FBgn0002023	Lim3	INTRON
2L_19088_SNP	19088	C	C	T	PASS	162210	0.564516	PASS	263158	0.375297	3.51281e-05	0.022945	FBgn0002121	l_2_gl	INTRON
2L_19090396_SNP	19090396	A	A	C	PASS	26987	0.244382	PASS	207168	0.448	5.11411e-06	0.0108736	FBgn0002023	Lim3	INTRON
2L_19095459_SNP	19095459	C	C	T	PASS	26436	0.12	PASS	26693	0.259053	0.00026295	0.0495643	FBgn0002023	Lim3	INTRON
2L_19099284_SNP	19099284	T	C	T	PASS	177232	0.567237	PASS	268162	0.376744	2.247e-05	0.0194534	FBgn0002023	Lim3	INTRON
2L_19099291_SNP	19099291	T	G	T	PASS	179239	0.57177	PASS	264161	0.378824	1.7186e-05	0.0177001	FBgn0002023	Lim3	INTRON
2L_19099300_SNP	19099300	T	T	A	PASS	31888	0.216749	PASS	262153	0.368675	0.00022787	0.0469181	FBgn0002023	Lim3	INTRON
2L_19099302_SNP	19099302	A	A	G	PASS	31686	0.21393	PASS	260156	0.375	9.75866e-05	0.0337212	FBgn0002023	Lim3	INTRON
2L_19099435_SNP	19099435	A	G	A	PASS	175203	0.537037	PASS	255139	0.352792	5.88626e-05	0.0278414	FBgn0002023	Lim3	INTRON
2L_19099439_SNP	19099439	G	A	G	PASS	181210	0.537084	PASS	256143	0.358396	8.802e-05	0.0323985	FBgn0002023	Lim3	INTRON
2L_19099497_SNP	19099497	C	C	G	PASS	37757	0.131336	PASS	294127	0.301663	3.83739e-06	0.00979272	FBgn0002023	Lim3	INTRON
2L_19107524_SNP	19107524	A	A	T	PASS	29422	0.0696202	PASS	27367	0.197059	0.00011403	0.0357558	FBgn0002023	Lim3	INTRON
2L_19111525_SNP	19111525	A	A	G	PASS	222129	0.367521	PASS	187243	0.565116	1.75329e-05	0.0177984	FBgn0000075	amd	INTRON
2L_19111562_SNP	19111562	T	T	A	PASS	240124	0.340659	PASS	204237	0.537415	1.42974e-05	0.016435	FBgn0000075	amd	INTRON
2L_19111564_SNP	19111564	T	T	A	PASS	238122	0.338889	PASS	207226	0.52194	5.60564e-05	0.0273541	FBgn0000075	amd	INTRON
2L_19111608_SNP	19111608	A	A	T	PASS	248147	0.372152	PASS	215266	0.553015	4.70418e-05	0.0257844	FBgn0000075	amd	INTRON
2L_19121082_SNP	19121082	A	A	T	PASS	25891	0.260745	PASS	199158	0.442577	5.9666e-05	0.0279457	FBgn0002031	l_2_37Cc	DOWNSTREAM	263
2L_19121082_SNP	19121082	A	A	T	PASS	25891	0.260745	PASS	199158	0.442577	5.9666e-05	0.0279457	FBgn0000422	Ddc	UPSTREAM	776
2L_19135241_SNP	19135241	A	A	G	PASS	31922	0.0645161	PASS	28069	0.197708	3.63371e-05	0.0232164	FBgn0010300	brat	INTRON
2L_19135241_SNP	19135241	A	A	G	PASS	31922	0.0645161	PASS	28069	0.197708	3.63371e-05	0.0232164	FBgn0086447	l_2_37Cg	UPSTREAM	8
2L_19135952_SNP	19135952	C	C	T	PASS	23523	0.0891473	PASS	27683	0.231198	0.00010704	0.0348658	FBgn0010300	brat	INTRON
2L_19135952_SNP	19135952	C	C	T	PASS	23523	0.0891473	PASS	27683	0.231198	0.00010704	0.0348658	FBgn0086447	l_2_37Cg	UPSTREAM	719
2L_19155660_SNP	19155660	A	A	G	PASS	35439	0.0992366	PASS	31696	0.23301	8.015e-05	0.0312743	FBgn0010300	brat	INTRON
2L_19156448_SNP	19156448	C	C	A	PASS	32923	0.0653409	PASS	31476	0.194872	3.80761e-05	0.023466	FBgn0010300	brat	INTRON
2L_19160835_SNP	19160835	C	C	T	PASS	33728	0.0767123	PASS	33389	0.2109	3.15531e-05	0.0219806	FBgn0010300	brat	INTRON
2L_19161257_SNP	19161257	G	G	A	PASS	38530	0.0722892	PASS	35278	0.181395	0.00026241	0.0495313	FBgn0010300	brat	INTRON
2L_19166279_SNP	19166279	A	A	T	PASS	32228	0.08	PASS	33583	0.198565	0.00021881	0.0461375	FBgn0010300	brat	UTR_5_PRIME
2L_19168035_SNP	19168035	A	A	T	PASS	19489	0.314488	PASS	148161	0.521036	3.09227e-05	0.0217837	FBgn0010300	brat	INTRON
2L_19168044_SNP	19168044	C	C	A	PASS	19586	0.30605	PASS	151152	0.50165	7.86072e-05	0.0310432	FBgn0010300	brat	INTRON
2L_19168340_SNP	19168340	T	T	C	PASS	19143	0.183761	PASS	16394	0.365759	0.00014339	0.0390624	FBgn0010300	brat	SYNONYMOUS_CODING
2L_19169000_SNP	19169000	G	G	C	PASS	23215	0.0607287	PASS	21452	0.195489	0.00013341	0.0378922	FBgn0010300	brat	SYNONYMOUS_CODING
2L_19181839_SNP	19181839	G	G	T	PASS	35731	0.0798969	PASS	34082	0.194313	0.00025659	0.0490852	FBgn0265263	CG42688	DOWNSTREAM	126
2L_19181839_SNP	19181839	G	G	T	PASS	35731	0.0798969	PASS	34082	0.194313	0.00025659	0.0490852	FBgn0032763	CG17568	UPSTREAM	137
2L_19194530_SNP	19194530	A	A	C	PASS	25797	0.274011	PASS	200198	0.497487	8.20846e-07	0.00513107	FBgn0015380	drl	INTRON
2L_19194550_SNP	19194550	C	C	T	PASS	250100	0.285714	PASS	203184	0.475452	3.02149e-05	0.0216284	FBgn0015380	drl	INTRON
2L_19208853_SNP	19208853	C	C	T	PASS	22379	0.261589	PASS	210166	0.441489	9.37273e-05	0.0332267	FBgn0015380	drl	DOWNSTREAM	232
2L_1921002_SNP	1921002	G	T	G	PASS	132131	0.498099	PASS	18882	0.303704	0.00013901	0.0385529	FBgn0031374	CG7337	INTRON
2L_19213858_SNP	19213858	C	A	C	PASS	20290	0.308219	PASS	155163	0.512579	2.98233e-05	0.0215772	Intergenic	Intergenic
2L_1921693_SNP	1921693	T	T	G	PASS	192209	0.521197	PASS	254134	0.345361	0.00010854	0.0350312	FBgn0031374	CG7337	INTRON
2L_19218181_SNP	19218181	G	G	A	PASS	32620	0.0578035	PASS	29882	0.215789	1.03054e-06	0.00568596	FBgn0265078	CR44189	DOWNSTREAM	46
2L_19222735_SNP	19222735	C	C	T	PASS	28227	0.0873786	PASS	21461	0.221818	0.00023232	0.0472445	Intergenic	Intergenic
2L_19227116_SNP	19227116	C	C	T	PASS	24574	0.231975	PASS	219143	0.395028	0.00025393	0.0488878	Intergenic	Intergenic
2L_19227127_SNP	19227127	A	A	T	PASS	24974	0.229102	PASS	213148	0.409972	5.252e-05	0.0268881	Intergenic	Intergenic
2L_19228508_SNP	19228508	A	A	G	PASS	20983	0.284247	PASS	28332	0.101587	3.40422e-06	0.00944477	Intergenic	Intergenic
2L_19228542_SNP	19228542	C	C	T	PASS	109132	0.547718	PASS	18775	0.28626	6.08422e-07	0.00462332	Intergenic	Intergenic
2L_19228552_SNP	19228552	T	T	C	PASS	118120	0.504202	PASS	18179	0.303846	0.00012957	0.0375878	Intergenic	Intergenic
2L_19232933_SNP	19232933	G	G	T	PASS	321100	0.23753	PASS	35742	0.105263	0.00010779	0.0349523	Intergenic	Intergenic
2L_19248831_SNP	19248831	G	G	C	PASS	19552	0.210526	PASS	25621	0.0758123	0.00024387	0.0480678	Intergenic	Intergenic
2L_19248895_SNP	19248895	A	A	T	PASS	20649	0.192157	AF	26812	0.0428571	8.35603e-06	0.0131658	Intergenic	Intergenic
2L_19249047_SNP	19249047	C	A	C	PASS	18371	0.279528	PASS	139147	0.513986	3.8628e-06	0.00979849	Intergenic	Intergenic
2L_19251776_SNP	19251776	A	A	T	PASS	25078	0.237805	PASS	29032	0.0993789	0.00014713	0.0395174	Intergenic	Intergenic
2L_19251854_SNP	19251854	T	T	A	PASS	25479	0.237237	PASS	32531	0.0870786	2.045e-05	0.0187348	Intergenic	Intergenic
2L_1925244_SNP	1925244	C	C	T	PASS	27260	0.180723	PASS	225117	0.342105	0.00013632	0.0382506	FBgn0031374	CG7337	INTRON
2L_19255794_SNP	19255794	C	C	A	PASS	32521	0.0606936	PASS	27787	0.239011	1.32953e-07	0.00248312	Intergenic	Intergenic
2L_1927157_SNP	1927157	T	C	T	PASS	26962	0.187311	PASS	237140	0.371353	1.54529e-05	0.0169284	FBgn0031374	CG7337	INTRON
2L_1927450_SNP	1927450	A	A	T	PASS	227103	0.312121	PASS	190195	0.506494	2.96816e-05	0.0215435	FBgn0031374	CG7337	INTRON
2L_19294640_SNP	19294640	C	C	T	PASS	30735	0.102339	PASS	28890	0.238095	0.00012901	0.0375036	Intergenic	Intergenic
2L_19301592_SNP	19301592	A	G	C	PASS	29542	0.124629	PASS	21787	0.286184	4.437e-05	0.0249827	FBgn0032769	CG10750	UTR_3_PRIME
2L_19305307_SNP	19305307	G	G	A	PASS	31729	0.083815	PASS	28181	0.223757	4.27114e-05	0.0246372	Intergenic	Intergenic
2L_19305341_SNP	19305341	T	T	C	PASS	32226	0.0747126	PASS	28974	0.203857	8.14777e-05	0.0314946	Intergenic	Intergenic
2L_19307221_SNP	19307221	T	C	T	PASS	26721	0.0729167	PASS	30179	0.207895	6.348e-05	0.0286699	Intergenic	Intergenic
2L_19313224_SNP	19313224	A	A	C	PASS	31123	0.0688623	PASS	27472	0.208092	2.68579e-05	0.0209715	Intergenic	Intergenic
2L_19313232_SNP	19313232	T	T	A	PASS	31624	0.0705882	PASS	28376	0.211699	2.0627e-05	0.0187765	Intergenic	Intergenic
2L_19313240_SNP	19313240	A	A	T	PASS	32327	0.0771429	PASS	27576	0.216524	3.44385e-05	0.0228024	Intergenic	Intergenic
2L_19320498_SNP	19320498	A	C	A	PASS	41164	0.134737	PASS	330122	0.269912	0.00011967	0.0364507	Intergenic	Intergenic
2L_19324220_SNP	19324220	C	A	C	PASS	36171	0.164352	PASS	299137	0.31422	8.09077e-05	0.031433	FBgn0267264	CR45700	EXON
2L_19337653_SNP	19337653	G	T	G	PASS	27647	0.145511	PASS	221109	0.330303	8.11599e-06	0.0131232	Intergenic	Intergenic
2L_19340036_SNP	19340036	G	G	A	PASS	27224	0.0810811	PASS	22685	0.273312	4.35298e-07	0.00432891	FBgn0024245	dnt	SYNONYMOUS_CODING
2L_19340813_SNP	19340813	C	C	G	PASS	23933	0.121324	PASS	22784	0.270096	0.00020866	0.0453965	FBgn0024245	dnt	SYNONYMOUS_CODING
2L_19341190_SNP	19341190	G	G	A	PASS	34438	0.0994764	PASS	274103	0.27321	1.50773e-06	0.00679136	FBgn0024245	dnt	INTRON
2L_19341309_SNP	19341309	C	C	A	PASS	31240	0.113636	PASS	25797	0.274011	1.896e-05	0.0182785	FBgn0024245	dnt	INTRON
2L_19341581_SNP	19341581	T	T	A	PASS	26925	0.085034	PASS	27285	0.238095	2.056e-05	0.0187654	FBgn0024245	dnt	INTRON
2L_19342850_SNP	19342850	T	T	C	PASS	24230	0.110294	PASS	23182	0.261981	0.00011435	0.0358271	FBgn0024245	dnt	INTRON
2L_19363364_SNP	19363364	C	A	C	PASS	29982	0.215223	PASS	221150	0.404313	1.10263e-05	0.0145896	FBgn0024245	dnt	UPSTREAM	137
2L_19363380_SNP	19363380	A	G	A	PASS	29484	0.222222	PASS	221147	0.399457	4.02e-05	0.0240391	FBgn0024245	dnt	UPSTREAM	153
2L_19363380_SNP	19363380	A	G	A	PASS	29484	0.222222	PASS	221147	0.399457	4.02e-05	0.0240391	FBgn0032770	CG13086	UPSTREAM	995
2L_19382903_SNP	19382903	C	C	T	PASS	168108	0.391304	PASS	110155	0.584906	0.00018473	0.0432123	FBgn0032772	CG17350	SYNONYMOUS_CODING
2L_19382903_SNP	19382903	C	C	T	PASS	168108	0.391304	PASS	110155	0.584906	0.00018473	0.0432123	FBgn0032773	fon	DOWNSTREAM	235
2L_1938419_SNP	1938419	A	T	A	PASS	238156	0.395939	PASS	326104	0.24186	0.00026062	0.0493853	FBgn0031374	CG7337	INTRON
2L_1938419_SNP	1938419	A	T	A	PASS	238156	0.395939	PASS	326104	0.24186	0.00026062	0.0493853	FBgn0011859	tRNA:G3:22BCa	UPSTREAM	26
2L_1938437_SNP	1938437	T	T	A	PASS	226118	0.343023	PASS	34080	0.190476	0.00020333	0.0450212	FBgn0031374	CG7337	INTRON
2L_1938437_SNP	1938437	T	T	A	PASS	226118	0.343023	PASS	34080	0.190476	0.00020333	0.0450212	FBgn0011859	tRNA:G3:22BCa	UPSTREAM	278
2L_19393109_SNP	19393109	G	A	G	PASS	31039	0.111748	PASS	272110	0.287958	2.69324e-06	0.00846601	FBgn0032775	CG17544	INTRON
2L_19393160_SNP	19393160	A	G	A	PASS	31042	0.119318	PASS	249101	0.288571	9.86561e-06	0.0140144	FBgn0032775	CG17544	INTRON
2L_19393160_SNP	19393160	A	G	A	PASS	31042	0.119318	PASS	249101	0.288571	9.86561e-06	0.0140144	FBgn0051798	CG31798	UPSTREAM	1
2L_19393382_SNP	19393382	A	G	A	PASS	34445	0.115681	PASS	308101	0.246944	0.00019252	0.0440319	FBgn0032775	CG17544	INTRON
2L_19393382_SNP	19393382	A	G	A	PASS	34445	0.115681	PASS	308101	0.246944	0.00019252	0.0440319	FBgn0051798	CG31798	UPSTREAM	778
2L_19400766_SNP	19400766	C	C	A	PASS	35733	0.0846154	PASS	29687	0.227154	2.04459e-05	0.0187348	FBgn0041789	Pax	DOWNSTREAM	15
2L_1940618_SNP	1940618	C	C	T	PASS	214126	0.370588	PASS	28862	0.177143	5.63922e-06	0.0114257	FBgn0031374	CG7337	INTRON
2L_19410711_SNP	19410711	C	A	C	PASS	7224	0.25	PASS	5867	0.536	7.172e-05	0.0300757	FBgn0041789	Pax	INTRON
2L_19412407_SNP	19412407	A	A	T	PASS	35640	0.10101	PASS	30890	0.226131	0.00021802	0.0461157	FBgn0041789	Pax	INTRON
2L_19415558_SNP	19415558	T	T	A	PASS	40632	0.0730594	PASS	424101	0.192381	5.00612e-05	0.026403	FBgn0041789	Pax	INTRON
2L_19415563_SNP	19415563	T	T	G	PASS	41235	0.0782998	PASS	432107	0.198516	5.34949e-05	0.0270117	FBgn0041789	Pax	INTRON
2L_19415605_SNP	19415605	G	G	A	PASS	37325	0.0628141	PASS	38092	0.194915	9.9661e-06	0.0140413	FBgn0041789	Pax	INTRON
2L_19415623_SNP	19415623	G	G	T	PASS	35225	0.066313	PASS	36480	0.18018	0.00013539	0.0381363	FBgn0041789	Pax	INTRON
2L_19416959_SNP	19416959	T	T	A	PASS	37127	0.0678392	PASS	33272	0.178218	0.00022977	0.0470739	FBgn0041789	Pax	INTRON
2L_19416959_SNP	19416959	T	T	A	PASS	37127	0.0678392	PASS	33272	0.178218	0.00022977	0.0470739	FBgn0016675	Lectin-galC1	UPSTREAM	488
2L_19440294_SNP	19440294	G	G	C	PASS	34625	0.0673854	PASS	30772	0.189974	8.40832e-05	0.0318303	FBgn0032783	CG10237	INTRON
2L_19449763_SNP	19449763	A	A	T	PASS	29834	0.10241	PASS	27085	0.239437	0.00014306	0.0390226	FBgn0003732	Top2	SYNONYMOUS_CODING
2L_1945335_SNP	1945335	G	A	G	PASS	199162	0.448753	PASS	260101	0.279778	0.00019332	0.0441165	FBgn0040719	CG15357	SYNONYMOUS_CODING
2L_1945335_SNP	1945335	G	A	G	PASS	199162	0.448753	PASS	260101	0.279778	0.00019332	0.0441165	FBgn0053673	CG33673	DOWNSTREAM	48
2L_1945785_SNP	1945785	G	G	T	PASS	248154	0.383085	PASS	173252	0.592941	3.42218e-06	0.00946896	FBgn0053673	CG33673	DOWNSTREAM	3
2L_1945785_SNP	1945785	G	G	T	PASS	248154	0.383085	PASS	173252	0.592941	3.42218e-06	0.00946896	FBgn0040719	CG15357	UPSTREAM	76
2L_1945789_SNP	1945789	G	T	G	PASS	148236	0.614583	PASS	256164	0.390476	8.90574e-07	0.00534862	FBgn0053673	CG33673	DOWNSTREAM	26
2L_1945789_SNP	1945789	G	T	G	PASS	148236	0.614583	PASS	256164	0.390476	8.90574e-07	0.00534862	FBgn0040719	CG15357	UPSTREAM	8
2L_1946017_SNP	1946017	C	C	A	PASS	18474	0.286822	PASS	174172	0.49711	1.81717e-05	0.0179714	FBgn0053673	CG33673	SYNONYMOUS_CODING
2L_1946017_SNP	1946017	C	C	A	PASS	18474	0.286822	PASS	174172	0.49711	1.81717e-05	0.0179714	FBgn0040719	CG15357	UPSTREAM	38
2L_19462029_SNP	19462029	T	C	T	PASS	27276	0.218391	PASS	213152	0.416438	6.85e-06	0.0123566	Intergenic	Intergenic
2L_19462122_SNP	19462122	C	T	C	PASS	28261	0.177843	PASS	262149	0.36253	8.0561e-06	0.0130909	Intergenic	Intergenic
2L_19462731_SNP	19462731	G	G	A	PASS	30226	0.0792683	PASS	21365	0.233813	2.0668e-05	0.0187765	Intergenic	Intergenic
2L_19463815_SNP	19463815	G	A	G	PASS	34456	0.14	PASS	273117	0.3	2.49881e-05	0.0203138	FBgn0000964	tj	UPSTREAM	452
2L_19463860_SNP	19463860	T	C	T	PASS	32952	0.136483	PASS	268106	0.283422	0.00010305	0.0343831	FBgn0000964	tj	UPSTREAM	47
2L_19470776_SNP	19470776	G	G	A	PASS	31932	0.0911681	PASS	27579	0.223164	0.00013273	0.0378261	FBgn0267287	CR45723	UPSTREAM	52
2L_19470776_SNP	19470776	G	G	A	PASS	31932	0.0911681	PASS	27579	0.223164	0.00013273	0.0378261	FBgn0264391	CR43839	DOWNSTREAM	68
2L_19470776_SNP	19470776	G	G	A	PASS	31932	0.0911681	PASS	27579	0.223164	0.00013273	0.0378261	FBgn0267286	CR45722	DOWNSTREAM	882
2L_19471742_SNP	19471742	A	A	G	PASS	19277	0.286245	PASS	188166	0.468927	0.00014947	0.0396716	FBgn0264391	CR43839	UPSTREAM	115
2L_19480087_SNP	19480087	A	A	G	PASS	34022	0.0607735	PASS	33871	0.173594	0.00014733	0.0395174	Intergenic	Intergenic
2L_19485017_SNP	19485017	C	C	T	PASS	36031	0.0792839	PASS	29278	0.210811	5.60049e-05	0.0273541	FBgn0032788	CG13084	SYNONYMOUS_CODING
2L_19485017_SNP	19485017	C	C	T	PASS	36031	0.0792839	PASS	29278	0.210811	5.60049e-05	0.0273541	FBgn0032787	CG10195	UPSTREAM	312
2L_19485949_SNP	19485949	G	G	A	PASS	22014	0.0598291	PASS	24161	0.201987	5.49543e-05	0.027228	FBgn0032788	CG13084	INTRON
2L_19489289_SNP	19489289	C	C	G	PASS	22061	0.217082	PASS	201127	0.387195	0.00020265	0.0449689	FBgn0032790	CG10194	INTRON
2L_19489289_SNP	19489289	C	C	G	PASS	22061	0.217082	PASS	201127	0.387195	0.00020265	0.0449689	FBgn0032789	CG13083	DOWNSTREAM	598
2L_19489289_SNP	19489289	C	C	G	PASS	22061	0.217082	PASS	201127	0.387195	0.00020265	0.0449689	FBgn0032791	CG18094	UPSTREAM	973
2L_19489346_SNP	19489346	T	T	C	PASS	26148	0.15534	PASS	225131	0.367978	5.86943e-07	0.00462332	FBgn0032790	CG10194	NON_SYNONYMOUS_CODING
2L_19489346_SNP	19489346	T	T	C	PASS	26148	0.15534	PASS	225131	0.367978	5.86943e-07	0.00462332	FBgn0032789	CG13083	DOWNSTREAM	655
2L_19489346_SNP	19489346	T	T	C	PASS	26148	0.15534	PASS	225131	0.367978	5.86943e-07	0.00462332	FBgn0032791	CG18094	UPSTREAM	916
2L_19489381_SNP	19489381	G	G	A	PASS	27316	0.0553633	PASS	26262	0.191358	3.17551e-05	0.021995	FBgn0032790	CG10194	SYNONYMOUS_CODING
2L_19489381_SNP	19489381	G	G	A	PASS	27316	0.0553633	PASS	26262	0.191358	3.17551e-05	0.021995	FBgn0032789	CG13083	DOWNSTREAM	69
2L_19489381_SNP	19489381	G	G	A	PASS	27316	0.0553633	PASS	26262	0.191358	3.17551e-05	0.021995	FBgn0032791	CG18094	UPSTREAM	881
2L_19523728_SNP	19523728	T	T	C	PASS	25219	0.0701107	PASS	23066	0.222973	2.2538e-05	0.0194679	FBgn0032798	CG10132	SYNONYMOUS_CODING
2L_19526600_SNP	19526600	C	C	A	PASS	31493	0.228501	PASS	256158	0.381643	0.00024099	0.0478635	FBgn0032800	CG10137	UPSTREAM	86
2L_19526600_SNP	19526600	C	C	A	PASS	31493	0.228501	PASS	256158	0.381643	0.00024099	0.0478635	FBgn0032799	CG10166	UPSTREAM	232
2L_19526600_SNP	19526600	C	C	A	PASS	31493	0.228501	PASS	256158	0.381643	0.00024099	0.0478635	FBgn0032801	CG10165	DOWNSTREAM	31
2L_19598901_SNP	19598901	G	G	A	PASS	31938	0.106443	PASS	29198	0.251928	4.78455e-05	0.0259435	FBgn0000464	Lar	INTRON
2L_19603179_SNP	19603179	C	C	A	PASS	35429	0.075718	PASS	28470	0.19774	0.00014898	0.0396115	FBgn0000464	Lar	INTRON
2L_19603179_SNP	19603179	C	C	A	PASS	35429	0.075718	PASS	28470	0.19774	0.00014898	0.0396115	FBgn0266313	CR44978	INTRON
2L_19604820_SNP	19604820	T	T	A	PASS	23945	0.158451	PASS	215100	0.31746	0.00019249	0.0440319	FBgn0266313	CR44978	INTRON
2L_19604820_SNP	19604820	T	T	A	PASS	23945	0.158451	PASS	215100	0.31746	0.00019249	0.0440319	FBgn0000464	Lar	INTRON
2L_19606292_SNP	19606292	T	T	C	PASS	31255	0.149864	PASS	264115	0.30343	8.379e-05	0.0317869	FBgn0000464	Lar	INTRON
2L_19606292_SNP	19606292	T	T	C	PASS	31255	0.149864	PASS	264115	0.30343	8.379e-05	0.0317869	FBgn0266313	CR44978	UPSTREAM	82
2L_19606300_SNP	19606300	A	A	G	PASS	30657	0.157025	PASS	266116	0.303665	0.00018954	0.0436377	FBgn0000464	Lar	INTRON
2L_19606300_SNP	19606300	A	A	G	PASS	30657	0.157025	PASS	266116	0.303665	0.00018954	0.0436377	FBgn0266313	CR44978	UPSTREAM	81
2L_19606322_SNP	19606322	A	A	T	PASS	27849	0.149847	PASS	233114	0.32853	1.36331e-05	0.0160483	FBgn0000464	Lar	INTRON
2L_19606322_SNP	19606322	A	A	T	PASS	27849	0.149847	PASS	233114	0.32853	1.36331e-05	0.0160483	FBgn0266313	CR44978	UPSTREAM	832
2L_19606336_SNP	19606336	A	A	G	PASS	26542	0.136808	PASS	22698	0.302469	4.74836e-05	0.0259067	FBgn0000464	Lar	INTRON
2L_19606336_SNP	19606336	A	A	G	PASS	26542	0.136808	PASS	22698	0.302469	4.74836e-05	0.0259067	FBgn0266313	CR44978	UPSTREAM	846
2L_19607671_SNP	19607671	C	C	G	PASS	28625	0.0803858	PASS	27575	0.214286	9.8093e-05	0.0337652	FBgn0000464	Lar	INTRON
2L_19618151_SNP	19618151	C	C	T	PASS	32225	0.0720461	PASS	29576	0.204852	4.6293e-05	0.0255374	FBgn0000464	Lar	INTRON
2L_19618815_SNP	19618815	A	A	G	PASS	38031	0.0754258	PASS	28571	0.199438	0.00010044	0.0340386	FBgn0000464	Lar	INTRON
2L_19632967_SNP	19632967	G	G	A	PASS	33849	0.126615	PASS	296111	0.272727	6.49372e-05	0.0289273	FBgn0000464	Lar	INTRON
2L_19634450_SNP	19634450	T	G	T	PASS	27952	0.1571	PASS	259119	0.314815	9.02517e-05	0.0326913	FBgn0000464	Lar	INTRON
2L_1965283_SNP	1965283	T	T	C	PASS	200142	0.415205	PASS	27291	0.250689	0.00023573	0.0475242	FBgn0031375	erm	INTRON
2L_1965283_SNP	1965283	T	T	C	PASS	200142	0.415205	PASS	27291	0.250689	0.00023573	0.0475242	FBgn0051942	tRNA:CR31942	UPSTREAM	143
2L_1965399_SNP	1965399	A	A	G	PASS	116177	0.604096	PASS	224117	0.343108	1.07811e-07	0.00235885	FBgn0031375	erm	INTRON
2L_1965399_SNP	1965399	A	A	G	PASS	116177	0.604096	PASS	224117	0.343108	1.07811e-07	0.00235885	FBgn0051942	tRNA:CR31942	UPSTREAM	27
2L_1965600_SNP	1965600	T	T	A	PASS	156234	0.6	PASS	220132	0.375	1.46895e-06	0.00671055	FBgn0031375	erm	INTRON
2L_1965600_SNP	1965600	T	T	A	PASS	156234	0.6	PASS	220132	0.375	1.46895e-06	0.00671055	FBgn0051942	tRNA:CR31942	DOWNSTREAM	12
2L_1965601_SNP	1965601	T	T	C	PASS	153232	0.602597	PASS	219132	0.376068	1.32288e-06	0.00639107	FBgn0031375	erm	INTRON
2L_1965601_SNP	1965601	T	T	C	PASS	153232	0.602597	PASS	219132	0.376068	1.32288e-06	0.00639107	FBgn0051942	tRNA:CR31942	DOWNSTREAM	13
2L_1965755_SNP	1965755	A	A	G	PASS	140186	0.570552	PASS	222134	0.376404	5.08237e-05	0.0265213	FBgn0031375	erm	INTRON
2L_1965755_SNP	1965755	A	A	G	PASS	140186	0.570552	PASS	222134	0.376404	5.08237e-05	0.0265213	FBgn0051942	tRNA:CR31942	DOWNSTREAM	257
2L_19694845_SNP	19694845	G	A	G	PASS	31324	0.0712166	PASS	25361	0.194268	0.0001963	0.0444131	FBgn0000464	Lar	INTRON
2L_1969658_SNP	1969658	G	G	C	PASS	237158	0.4	PASS	29494	0.242268	0.0002363	0.0475487	FBgn0031375	erm	INTRON
2L_19720667_SNP	19720667	C	T	C	PASS	232144	0.382979	PASS	164217	0.569554	5.71665e-05	0.0275573	FBgn0000464	Lar	INTRON
2L_19720669_SNP	19720669	T	G	T	PASS	230141	0.380054	PASS	166214	0.563158	8.09723e-05	0.0314427	FBgn0000464	Lar	INTRON
2L_19723140_SNP	19723140	T	T	C	PASS	25576	0.229607	PASS	31530	0.0869565	4.84729e-05	0.0260551	FBgn0000464	Lar	INTRON
2L_19758337_SNP	19758337	C	C	T	PASS	20571	0.257246	PASS	25030	0.107143	0.00015072	0.0398095	FBgn0032818	CG10628	NON_SYNONYMOUS_CODING
2L_19758337_SNP	19758337	C	C	T	PASS	20571	0.257246	PASS	25030	0.107143	0.00015072	0.0398095	FBgn0032819	CG10463	UPSTREAM	542
2L_19795257_SNP	19795257	A	A	G	PASS	26943	0.137821	PASS	254103	0.288515	0.00014041	0.0386835	FBgn0004811	fs_2_ltoPP43	INTRON
2L_19798048_SNP	19798048	T	T	C	PASS	28975	0.206044	PASS	34432	0.0851064	0.00024452	0.0481154	FBgn0263873	sick	INTRON
2L_19802315_SNP	19802315	T	C	T	PASS	30641	0.118156	PASS	255105	0.291667	5.81531e-06	0.0115252	FBgn0263873	sick	INTRON
2L_19802_SNP	19802	C	C	T	PASS	162193	0.543662	PASS	206119	0.366154	0.00020647	0.0452164	FBgn0002121	l_2_gl	INTRON
2L_19809236_SNP	19809236	A	A	C	PASS	232147	0.387863	PASS	171219	0.561538	0.00016693	0.041509	FBgn0263873	sick	INTRON
2L_19813340_SNP	19813340	T	T	A	PASS	22076	0.256757	PASS	27230	0.0993378	3.95237e-05	0.0238183	FBgn0263873	sick	INTRON
2L_19813340_SNP	19813340	T	T	A	PASS	22076	0.256757	PASS	27230	0.0993378	3.95237e-05	0.0238183	FBgn0032824	CG13962	DOWNSTREAM	364
2L_19813340_SNP	19813340	T	T	A	PASS	22076	0.256757	PASS	27230	0.0993378	3.95237e-05	0.0238183	FBgn0003923	snRNA:U2:38ABb	DOWNSTREAM	54
2L_19816769_SNP	19816769	T	T	A	PASS	28085	0.232877	PASS	238162	0.405	6.64524e-05	0.0291458	FBgn0263873	sick	INTRON
2L_19816769_SNP	19816769	T	T	A	PASS	28085	0.232877	PASS	238162	0.405	6.64524e-05	0.0291458	FBgn0043021	snRNA:U5:38ABb	DOWNSTREAM	229
2L_19816769_SNP	19816769	T	T	A	PASS	28085	0.232877	PASS	238162	0.405	6.64524e-05	0.0291458	FBgn0003922	snRNA:U2:38ABa	UPSTREAM	964
2L_19824413_SNP	19824413	G	C	G	PASS	31335	0.100575	PASS	33297	0.226107	0.00023784	0.0476689	FBgn0263873	sick	INTRON
2L_19833052_SNP	19833052	G	G	T	PASS	201140	0.410557	PASS	29087	0.230769	4.52368e-05	0.0252568	FBgn0263873	sick	INTRON
2L_19833075_SNP	19833075	A	A	C	PASS	30646	0.130682	PASS	260116	0.308511	4.86755e-06	0.0106799	FBgn0263873	sick	INTRON
2L_19833079_SNP	19833079	A	A	G	PASS	30649	0.138028	PASS	259116	0.309333	1.19761e-05	0.0152716	FBgn0263873	sick	INTRON
2L_19833083_SNP	19833083	T	T	C	PASS	29853	0.150997	PASS	268117	0.303896	9.91025e-05	0.0338554	FBgn0263873	sick	INTRON
2L_19833096_SNP	19833096	T	T	C	PASS	30260	0.165746	PASS	258122	0.321053	0.00010708	0.0348682	FBgn0263873	sick	INTRON
2L_19833109_SNP	19833109	G	G	T	PASS	30861	0.165312	PASS	262123	0.319481	0.00010873	0.0350721	FBgn0263873	sick	INTRON
2L_19833116_SNP	19833116	C	T	C	PASS	31967	0.173575	PASS	259141	0.3525	9.5236e-06	0.0139413	FBgn0263873	sick	INTRON
2L_19833123_SNP	19833123	C	C	T	PASS	31463	0.167109	PASS	261132	0.335878	2.53563e-05	0.0203741	FBgn0263873	sick	INTRON
2L_19833135_SNP	19833135	A	A	G	PASS	32360	0.156658	PASS	269127	0.320707	2.89367e-05	0.0215127	FBgn0263873	sick	INTRON
2L_19833199_SNP	19833199	A	G	A	PASS	12268	0.357895	PASS	95130	0.577778	0.00011388	0.0357391	FBgn0263873	sick	INTRON
2L_19833389_SNP	19833389	A	A	T	PASS	33236	0.0978261	PASS	286103	0.264781	3.05494e-06	0.00914361	FBgn0263873	sick	INTRON
2L_19842945_SNP	19842945	C	C	G	PASS	31724	0.0703812	PASS	28570	0.197183	9.28941e-05	0.0331236	FBgn0263873	sick	INTRON
2L_19844640_SNP	19844640	G	G	C	PASS	22421	0.0857143	PASS	19362	0.243137	6.63873e-05	0.0291458	FBgn0263873	sick	INTRON
2L_19847809_SNP	19847809	C	C	T	PASS	24896	0.27907	PASS	191169	0.469444	3.43448e-05	0.0227911	FBgn0263873	sick	INTRON
2L_1985699_SNP	1985699	G	G	A	PASS	126144	0.533333	PASS	19595	0.327586	4.949e-05	0.0262847	FBgn0001125	Got2	SYNONYMOUS_CODING
2L_1985930_SNP	1985930	C	C	A	PASS	20396	0.32107	PASS	26547	0.150641	5.38582e-05	0.027076	FBgn0001125	Got2	INTRON
2L_1985933_SNP	1985933	G	G	A	PASS	20494	0.315436	PASS	26247	0.152104	0.00010719	0.0348794	FBgn0001125	Got2	INTRON
2L_19866723_SNP	19866723	G	A	G	PASS	30525	0.0757576	PASS	25379	0.237952	4.10279e-06	0.00991818	FBgn0263873	sick	INTRON
2L_1986826_SNP	1986826	C	C	T	AF	39114	0.0345679	PASS	29950	0.143266	4.09561e-05	0.0241612	FBgn0001125	Got2	INTRON
2L_19868701_SNP	19868701	A	A	G	PASS	30223	0.0707692	PASS	31276	0.195876	0.00010351	0.0344389	FBgn0263873	sick	INTRON
2L_19870659_SNP	19870659	A	A	G	PASS	37632	0.0784314	PASS	28670	0.196629	0.00021375	0.045758	FBgn0263873	sick	INTRON
2L_19870697_SNP	19870697	T	C	T	PASS	28384	0.228883	PASS	188135	0.417957	2.39418e-05	0.0200709	FBgn0263873	sick	INTRON
2L_19878227_SNP	19878227	G	G	T	PASS	25660	0.189873	PASS	189103	0.35274	0.00023581	0.0475242	FBgn0263873	sick	INTRON
2L_19878241_SNP	19878241	A	A	G	PASS	23353	0.185315	PASS	176100	0.362319	0.0001034	0.034438	FBgn0263873	sick	INTRON
2L_19885260_SNP	19885260	A	A	G	PASS	35039	0.100257	PASS	32594	0.224344	0.00021906	0.0461426	FBgn0263873	sick	INTRON
2L_19888837_SNP	19888837	T	T	C	PASS	22556	0.199288	PASS	179111	0.382759	7.12454e-05	0.0300334	FBgn0263873	sick	INTRON
2L_19893617_SNP	19893617	A	A	T	PASS	33829	0.0790191	PASS	32884	0.203883	0.00010036	0.0340263	FBgn0263873	sick	INTRON
2L_19893830_SNP	19893830	C	C	T	PASS	29249	0.143695	PASS	261108	0.292683	0.00014036	0.0386835	FBgn0263873	sick	INTRON
2L_19899342_SNP	19899342	T	T	C	PASS	22038	0.147287	PASS	20296	0.322148	5.97058e-05	0.0279457	FBgn0263873	sick	INTRON
2L_19900568_SNP	19900568	C	C	T	PASS	24077	0.242902	PASS	33833	0.0889488	1.57111e-05	0.017055	FBgn0263873	sick	INTRON
2L_19913004_SNP	19913004	T	T	G	PASS	39035	0.0823529	PASS	30879	0.204134	0.00013207	0.0377809	FBgn0263873	sick	INTRON
2L_19913004_SNP	19913004	T	T	G	PASS	39035	0.0823529	PASS	30879	0.204134	0.00013207	0.0377809	FBgn0053117	Victoria	UTR_3_PRIME
2L_19913004_SNP	19913004	T	T	G	PASS	39035	0.0823529	PASS	30879	0.204134	0.00013207	0.0377809	FBgn0044811	TotF	UPSTREAM	627
2L_19924220_SNP	19924220	C	C	T	PASS	28148	0.145897	PASS	23999	0.292899	0.00023578	0.0475242	FBgn0263873	sick	INTRON
2L_19924220_SNP	19924220	C	C	T	PASS	28148	0.145897	PASS	23999	0.292899	0.00023578	0.0475242	FBgn0264375	CR43827	DOWNSTREAM	646
2L_19924229_SNP	19924229	T	T	C	PASS	28054	0.161677	PASS	232121	0.342776	1.31876e-05	0.0158611	FBgn0263873	sick	INTRON
2L_19924229_SNP	19924229	T	T	C	PASS	28054	0.161677	PASS	232121	0.342776	1.31876e-05	0.0158611	FBgn0264375	CR43827	DOWNSTREAM	655
2L_19924498_SNP	19924498	T	T	G	PASS	258132	0.338462	PASS	204211	0.508434	0.00016047	0.0408804	FBgn0263873	sick	INTRON
2L_19924498_SNP	19924498	T	T	G	PASS	258132	0.338462	PASS	204211	0.508434	0.00016047	0.0408804	FBgn0264375	CR43827	DOWNSTREAM	924
2L_19924505_SNP	19924505	T	T	A	PASS	266131	0.329975	PASS	207209	0.502404	0.0001182	0.0362832	FBgn0263873	sick	INTRON
2L_19924505_SNP	19924505	T	T	A	PASS	266131	0.329975	PASS	207209	0.502404	0.0001182	0.0362832	FBgn0264375	CR43827	DOWNSTREAM	931
2L_19924507_SNP	19924507	A	A	G	PASS	271125	0.315657	PASS	209207	0.497596	4.60445e-05	0.0254756	FBgn0263873	sick	INTRON
2L_19924507_SNP	19924507	A	A	G	PASS	271125	0.315657	PASS	209207	0.497596	4.60445e-05	0.0254756	FBgn0264375	CR43827	DOWNSTREAM	933
2L_19924521_SNP	19924521	T	T	A	PASS	284145	0.337995	PASS	195207	0.514925	7.422e-05	0.0303355	FBgn0263873	sick	INTRON
2L_19924521_SNP	19924521	T	T	A	PASS	284145	0.337995	PASS	195207	0.514925	7.422e-05	0.0303355	FBgn0264375	CR43827	DOWNSTREAM	947
2L_19928476_SNP	19928476	T	C	T	PASS	193132	0.406154	PASS	122176	0.590604	0.00018924	0.0436274	FBgn0263873	sick	INTRON
2L_19935084_SNP	19935084	A	G	A	PASS	183101	0.355634	PASS	25560	0.190476	0.00021422	0.0458071	FBgn0263873	sick	INTRON
2L_19935084_SNP	19935084	A	G	A	PASS	183101	0.355634	PASS	25560	0.190476	0.00021422	0.0458071	FBgn0266693	CR45183	UPSTREAM	767
2L_19938017_SNP	19938017	A	A	G	PASS	25043	0.146758	PASS	225106	0.320242	3.33567e-05	0.0225841	FBgn0263873	sick	INTRON
2L_19938660_SNP	19938660	C	C	G	PASS	35536	0.0920716	PASS	32288	0.214634	0.0001939	0.0441954	FBgn0263873	sick	INTRON
2L_19940464_SNP	19940464	A	C	A	PASS	23576	0.244373	PASS	33228	0.0777778	2.69576e-06	0.00846601	FBgn0263873	sick	INTRON
2L_19940524_SNP	19940524	T	T	A	PASS	19870	0.261194	PASS	176143	0.448276	0.000108	0.0349537	FBgn0263873	sick	INTRON
2L_19940539_SNP	19940539	T	T	C	PASS	21771	0.246528	PASS	185151	0.449405	1.65884e-05	0.0174572	FBgn0263873	sick	INTRON
2L_19940547_SNP	19940547	T	T	G	PASS	20865	0.238095	PASS	176142	0.446541	1.28618e-05	0.0157471	FBgn0263873	sick	INTRON
2L_19940626_SNP	19940626	G	T	G	PASS	26379	0.230994	PASS	34129	0.0783784	8.24503e-06	0.0131232	FBgn0263873	sick	INTRON
2L_19956501_SNP	19956501	A	A	T	PASS	208104	0.333333	PASS	157165	0.512422	0.00022297	0.0465353	FBgn0263873	sick	SYNONYMOUS_CODING
2L_1995973_SNP	1995973	C	C	T	PASS	211112	0.346749	PASS	26252	0.165605	2.31411e-05	0.0196999	Intergenic	Intergenic
2L_19959779_SNP	19959779	T	T	C	PASS	186105	0.360825	PASS	148186	0.556886	6.837e-05	0.0295198	FBgn0032833	CoIV	SYNONYMOUS_CODING
2L_19959779_SNP	19959779	T	T	C	PASS	186105	0.360825	PASS	148186	0.556886	6.837e-05	0.0295198	FBgn0054051	CG34051	DOWNSTREAM	29
2L_1996230_SNP	1996230	G	G	A	PASS	234108	0.315789	PASS	27450	0.154321	8.16932e-05	0.0315302	FBgn0053543	CG33543	DOWNSTREAM	872
2L_19962418_SNP	19962418	T	T	C	PASS	21985	0.279605	PASS	151130	0.462633	0.00017358	0.0422401	FBgn0032834	CG13965	UPSTREAM	66
2L_19962418_SNP	19962418	T	T	C	PASS	21985	0.279605	PASS	151130	0.462633	0.00017358	0.0422401	FBgn0032835	CG16772	UPSTREAM	261
2L_19962418_SNP	19962418	T	T	C	PASS	21985	0.279605	PASS	151130	0.462633	0.00017358	0.0422401	FBgn0262140	CG42866	UPSTREAM	733
2L_19988124_SNP	19988124	T	T	G	PASS	24270	0.224359	PASS	237167	0.413366	1.93928e-05	0.0184356	FBgn0264443	CG43861	INTRON
2L_19991197_SNP	19991197	A	A	C	PASS	32382	0.202469	PASS	221129	0.368571	7.75124e-05	0.0308897	FBgn0264443	CG43861	INTRON
2L_19998731_SNP	19998731	C	C	T	PASS	145159	0.523026	PASS	238126	0.346154	0.00022771	0.0469177	FBgn0264443	CG43861	INTRON
2L_20002772_SNP	20002772	T	T	G	PASS	39341	0.09447	PASS	362102	0.219828	9.54383e-05	0.0334685	FBgn0264443	CG43861	INTRON
2L_20017229_SNP	20017229	T	T	A	PASS	20791	0.305369	PASS	185180	0.493151	7.8576e-05	0.0310389	FBgn0264443	CG43861	START_GAINED
2L_20022501_SNP	20022501	C	C	T	PASS	218100	0.314465	PASS	190184	0.491979	0.00015515	0.0403404	Intergenic	Intergenic
2L_20025967_SNP	20025967	T	T	A	PASS	32926	0.0732394	PASS	29571	0.193989	0.00016613	0.0414723	FBgn0032839	CG10659	UPSTREAM	156
2L_20032148_SNP	20032148	G	G	A	PASS	25314	0.0524345	PASS	23960	0.200669	1.25882e-05	0.0156679	FBgn0032840	sNPF	INTRON
2L_2003289_SNP	2003289	T	T	C	PASS	29028	0.0880503	PASS	25877	0.229851	6.69821e-05	0.029234	FBgn0053543	CG33543	INTRON
2L_2003289_SNP	2003289	T	T	C	PASS	29028	0.0880503	PASS	25877	0.229851	6.69821e-05	0.029234	FBgn0263441	CR43464	INTRON
2L_20038760_SNP	20038760	G	G	A	PASS	31226	0.0769231	PASS	27371	0.206395	0.00010826	0.0349923	FBgn0032840	sNPF	INTRON
2L_20038764_SNP	20038764	T	T	G	PASS	30124	0.0738461	PASS	26667	0.201201	0.00013819	0.0384639	FBgn0032840	sNPF	INTRON
2L_20039233_SNP	20039233	C	C	T	PASS	163204	0.555858	PASS	270158	0.369159	4.371e-05	0.0248362	FBgn0032840	sNPF	INTRON
2L_20039273_SNP	20039273	C	C	T	PASS	256132	0.340206	PASS	207213	0.507143	0.0002072	0.0452931	FBgn0032840	sNPF	INTRON
2L_20039311_SNP	20039311	T	T	C	PASS	160142	0.470199	PASS	23692	0.280488	6.90837e-05	0.0296371	FBgn0032840	sNPF	INTRON
2L_20039810_SNP	20039810	T	C	T	PASS	18382	0.309434	PASS	133138	0.509225	9.216e-05	0.0330037	FBgn0032840	sNPF	INTRON
2L_2004061_SNP	2004061	T	T	A	PASS	37728	0.0691358	PASS	34188	0.205128	1.16712e-05	0.0150297	FBgn0053543	CG33543	INTRON
2L_2004061_SNP	2004061	T	T	A	PASS	37728	0.0691358	PASS	34188	0.205128	1.16712e-05	0.0150297	FBgn0263441	CR43464	DOWNSTREAM	126
2L_20041233_SNP	20041233	T	T	A	PASS	213120	0.36036	PASS	162210	0.564516	1.63024e-05	0.0173174	FBgn0032840	sNPF	INTRON
2L_20041235_SNP	20041235	G	A	G	PASS	116188	0.618421	PASS	214138	0.392045	3.25114e-06	0.00930667	FBgn0032840	sNPF	INTRON
2L_20041258_SNP	20041258	T	T	G	PASS	218129	0.371758	PASS	168218	0.564767	3.75746e-05	0.0234113	FBgn0032840	sNPF	INTRON
2L_20041279_SNP	20041279	G	G	T	PASS	211130	0.381232	PASS	150210	0.583333	2.10878e-05	0.0189679	FBgn0032840	sNPF	INTRON
2L_20041403_SNP	20041403	T	T	A	PASS	32641	0.111717	PASS	25884	0.245614	0.00022593	0.0468155	FBgn0032840	sNPF	INTRON
2L_20042586_SNP	20042586	A	A	T	PASS	29135	0.107362	PASS	27589	0.244505	0.00016603	0.0414716	FBgn0032840	sNPF	INTRON
2L_20043438_SNP	20043438	T	T	A	PASS	199101	0.336667	PASS	30867	0.178667	0.00018441	0.0432123	FBgn0032840	sNPF	INTRON
2L_20043709_SNP	20043709	A	A	G	PASS	28851	0.150442	PASS	221109	0.330303	1.29168e-05	0.0157625	FBgn0032840	sNPF	INTRON
2L_20043721_SNP	20043721	C	C	T	PASS	25775	0.225904	PASS	30532	0.0949555	0.00021787	0.0461157	FBgn0032840	sNPF	INTRON
2L_2004642_SNP	2004642	A	A	G	PASS	29924	0.0743034	PASS	27976	0.214085	3.5013e-05	0.022945	FBgn0053543	CG33543	INTRON
2L_2004642_SNP	2004642	A	A	G	PASS	29924	0.0743034	PASS	27976	0.214085	3.5013e-05	0.022945	FBgn0263441	CR43464	DOWNSTREAM	77
2L_20048443_SNP	20048443	T	T	G	PASS	229124	0.351275	PASS	182232	0.560386	5.83294e-06	0.0115414	FBgn0032840	sNPF	INTRON
2L_2006016_SNP	2006016	C	C	T	PASS	24320	0.0760456	PASS	21163	0.229927	3.85123e-05	0.0235924	FBgn0053543	CG33543	UTR_5_PRIME
2L_2006016_SNP	2006016	C	C	T	PASS	24320	0.0760456	PASS	21163	0.229927	3.85123e-05	0.0235924	FBgn0040718	CG15353	DOWNSTREAM	747
2L_2006016_SNP	2006016	C	C	T	PASS	24320	0.0760456	PASS	21163	0.229927	3.85123e-05	0.0235924	FBgn0267276	CR45712	UPSTREAM	851
2L_20063271_SNP	20063271	A	C	A	PASS	137181	0.569182	PASS	244146	0.374359	4.057e-05	0.0240724	FBgn0019686	lok	INTRON
2L_20063271_SNP	20063271	A	C	A	PASS	137181	0.569182	PASS	244146	0.374359	4.057e-05	0.0240724	FBgn0003978	vls	DOWNSTREAM	99
2L_20064873_SNP	20064873	G	G	C	PASS	20224	0.106195	PASS	15058	0.278846	9.37015e-05	0.0332267	FBgn0003978	vls	SYNONYMOUS_CODING
2L_20064873_SNP	20064873	G	G	C	PASS	20224	0.106195	PASS	15058	0.278846	9.37015e-05	0.0332267	FBgn0019686	lok	DOWNSTREAM	492
2L_2006509_SNP	2006509	G	G	A	AF	36914	0.0365535	PASS	29256	0.16092	9.00775e-06	0.0136508	FBgn0053543	CG33543	UPSTREAM	196
2L_2006509_SNP	2006509	G	G	A	AF	36914	0.0365535	PASS	29256	0.16092	9.00775e-06	0.0136508	FBgn0040718	CG15353	DOWNSTREAM	254
2L_2006509_SNP	2006509	G	G	A	AF	36914	0.0365535	PASS	29256	0.16092	9.00775e-06	0.0136508	FBgn0267276	CR45712	UPSTREAM	358
2L_20067249_SNP	20067249	A	A	G	PASS	134161	0.545763	PASS	195111	0.362745	0.00023562	0.0475242	FBgn0045064	bwa	INTRON
2L_20067253_SNP	20067253	T	T	C	PASS	139164	0.541254	PASS	196108	0.355263	0.00017379	0.0422433	FBgn0045064	bwa	INTRON
2L_20067633_SNP	20067633	A	T	A	PASS	229147	0.390957	PASS	151201	0.571023	0.00012586	0.0371296	FBgn0045064	bwa	INTRON
2L_20068859_SNP	20068859	T	T	A	PASS	34956	0.138272	PASS	300113	0.273608	0.00022384	0.0466536	FBgn0045064	bwa	INTRON
2L_20068859_SNP	20068859	T	T	A	PASS	34956	0.138272	PASS	300113	0.273608	0.00022384	0.0466536	FBgn0266212	CR44907	EXON
2L_20068902_SNP	20068902	A	A	G	PASS	35461	0.146988	PASS	286124	0.302439	3.83244e-05	0.0235338	FBgn0045064	bwa	INTRON
2L_20068902_SNP	20068902	A	A	G	PASS	35461	0.146988	PASS	286124	0.302439	3.83244e-05	0.0235338	FBgn0266212	CR44907	EXON
2L_20068907_SNP	20068907	A	A	T	PASS	35960	0.143198	PASS	290124	0.299517	2.98636e-05	0.0215772	FBgn0266212	CR44907	EXON
2L_20068907_SNP	20068907	A	A	T	PASS	35960	0.143198	PASS	290124	0.299517	2.98636e-05	0.0215772	FBgn0045064	bwa	INTRON
2L_20069531_SNP	20069531	G	G	A	PASS	221115	0.342262	PASS	142171	0.546326	2.525e-05	0.0203741	FBgn0045064	bwa	INTRON
2L_20069531_SNP	20069531	G	G	A	PASS	221115	0.342262	PASS	142171	0.546326	2.525e-05	0.0203741	FBgn0266212	CR44907	UPSTREAM	213
2L_20069531_SNP	20069531	G	G	A	PASS	221115	0.342262	PASS	142171	0.546326	2.525e-05	0.0203741	FBgn0032843	CG10730	DOWNSTREAM	55
2L_20069663_SNP	20069663	A	A	T	PASS	29763	0.175	PASS	247127	0.339572	5.902e-05	0.027846	FBgn0045064	bwa	INTRON
2L_20069663_SNP	20069663	A	A	T	PASS	29763	0.175	PASS	247127	0.339572	5.902e-05	0.027846	FBgn0266212	CR44907	UPSTREAM	345
2L_20069663_SNP	20069663	A	A	T	PASS	29763	0.175	PASS	247127	0.339572	5.902e-05	0.027846	FBgn0032843	CG10730	DOWNSTREAM	418
2L_20069852_SNP	20069852	G	A	G	PASS	158206	0.565934	PASS	201126	0.385321	0.00015486	0.0403264	FBgn0045064	bwa	INTRON
2L_20069852_SNP	20069852	G	A	G	PASS	158206	0.565934	PASS	201126	0.385321	0.00015486	0.0403264	FBgn0032843	CG10730	DOWNSTREAM	229
2L_20069852_SNP	20069852	G	A	G	PASS	158206	0.565934	PASS	201126	0.385321	0.00015486	0.0403264	FBgn0266212	CR44907	UPSTREAM	534
2L_20069892_SNP	20069892	A	A	T	PASS	206114	0.35625	PASS	121162	0.572438	1.44733e-05	0.0164862	FBgn0045064	bwa	INTRON
2L_20069892_SNP	20069892	A	A	T	PASS	206114	0.35625	PASS	121162	0.572438	1.44733e-05	0.0164862	FBgn0032843	CG10730	DOWNSTREAM	189
2L_20069892_SNP	20069892	A	A	T	PASS	206114	0.35625	PASS	121162	0.572438	1.44733e-05	0.0164862	FBgn0266212	CR44907	UPSTREAM	574
2L_20070114_SNP	20070114	T	T	C	PASS	30166	0.179837	PASS	264130	0.329949	0.00020309	0.0450132	FBgn0032843	CG10730	UTR_3_PRIME
2L_20070114_SNP	20070114	T	T	C	PASS	30166	0.179837	PASS	264130	0.329949	0.00020309	0.0450132	FBgn0045064	bwa	INTRON
2L_20070114_SNP	20070114	T	T	C	PASS	30166	0.179837	PASS	264130	0.329949	0.00020309	0.0450132	FBgn0266212	CR44907	UPSTREAM	796
2L_20080399_SNP	20080399	A	A	T	PASS	32731	0.0865922	PASS	30482	0.212435	0.00015698	0.0404941	FBgn0263773	fok	INTRON
2L_20080399_SNP	20080399	A	A	T	PASS	32731	0.0865922	PASS	30482	0.212435	0.00015698	0.0404941	FBgn0004374	neb	INTRON
2L_20080402_SNP	20080402	T	T	C	PASS	32030	0.0857143	PASS	29483	0.220159	7.1213e-05	0.0300334	FBgn0004374	neb	INTRON
2L_20080402_SNP	20080402	T	T	C	PASS	32030	0.0857143	PASS	29483	0.220159	7.1213e-05	0.0300334	FBgn0263773	fok	INTRON
2L_20086503_SNP	20086503	G	G	A	PASS	19218	0.0857143	PASS	14757	0.279412	1.092e-05	0.0145425	FBgn0004374	neb	INTRON
2L_2009250_SNP	2009250	A	A	C	AF	35412	0.0327869	PASS	32547	0.126344	0.00021984	0.0462464	FBgn0051943	tRNA:CR31943	DOWNSTREAM	24
2L_2009250_SNP	2009250	A	A	C	AF	35412	0.0327869	PASS	32547	0.126344	0.00021984	0.0462464	FBgn0040717	Nplp4	DOWNSTREAM	178
2L_2009250_SNP	2009250	A	A	C	AF	35412	0.0327869	PASS	32547	0.126344	0.00021984	0.0462464	FBgn0051944	tRNA:CR31944	UPSTREAM	288
2L_2009250_SNP	2009250	A	A	C	AF	35412	0.0327869	PASS	32547	0.126344	0.00021984	0.0462464	FBgn0031384	CG4238	UPSTREAM	69
2L_20097404_SNP	20097404	T	T	G	PASS	24977	0.236196	PASS	214150	0.412088	8.529e-05	0.0320628	FBgn0032849	mRpS18B	UPSTREAM	151
2L_20097404_SNP	20097404	T	T	G	PASS	24977	0.236196	PASS	214150	0.412088	8.529e-05	0.0320628	FBgn0032850	Kua	UPSTREAM	177
2L_20104243_SNP	20104243	C	C	A	PASS	32744	0.118598	PASS	286124	0.302439	9.5592e-07	0.00556644	FBgn0032851	CG13970	UPSTREAM	93
2L_20104243_SNP	20104243	C	C	A	PASS	32744	0.118598	PASS	286124	0.302439	9.5592e-07	0.00556644	FBgn0032850	Kua	DOWNSTREAM	868
2L_20104987_SNP	20104987	C	C	T	PASS	26752	0.163009	PASS	245132	0.350133	7.24603e-06	0.0126392	FBgn0032851	CG13970	UPSTREAM	837
2L_20105047_SNP	20105047	G	G	T	PASS	24639	0.136842	PASS	223108	0.326284	6.12683e-06	0.0117731	FBgn0032851	CG13970	UPSTREAM	897
2L_20112685_SNP	20112685	T	T	C	PASS	32750	0.132626	PASS	281125	0.307882	4.20865e-06	0.00998689	Intergenic	Intergenic
2L_20113047_SNP	20113047	A	A	T	PASS	32625	0.0712251	PASS	33175	0.184729	0.00025801	0.0491596	Intergenic	Intergenic
2L_20113048_SNP	20113048	A	A	T	PASS	32524	0.0687679	PASS	33374	0.181818	0.00024207	0.0479607	Intergenic	Intergenic
2L_20113671_SNP	20113671	G	G	A	PASS	31828	0.0809249	PASS	29580	0.213333	7.36025e-05	0.0302444	Intergenic	Intergenic
2L_20114430_SNP	20114430	C	C	T	PASS	34828	0.0744681	PASS	29573	0.19837	0.00010979	0.0351549	Intergenic	Intergenic
2L_20128961_SNP	20128961	C	C	T	PASS	27347	0.146875	PASS	253107	0.297222	0.00016721	0.0415544	Intergenic	Intergenic
2L_20132163_SNP	20132163	T	T	G	PASS	29844	0.128655	PASS	260110	0.297297	1.35124e-05	0.0159553	Intergenic	Intergenic
2L_20137165_SNP	20137165	C	C	T	PASS	184129	0.412141	PASS	27288	0.244444	0.00021402	0.04579	Intergenic	Intergenic
2L_20141448_SNP	20141448	A	A	G	PASS	31625	0.0733138	PASS	28776	0.209366	3.924e-05	0.0237936	Intergenic	Intergenic
2L_20141483_SNP	20141483	T	G	T	PASS	228112	0.329412	PASS	176183	0.509749	0.00012343	0.0367898	Intergenic	Intergenic
2L_20170452_SNP	20170452	G	G	C	PASS	28027	0.0879479	PASS	33693	0.216783	0.00014737	0.0395174	Intergenic	Intergenic
2L_2017212_SNP	2017212	A	A	G	PASS	29552	0.149856	AF	36616	0.0418848	9.53689e-05	0.0334607	FBgn0031384	CG4238	INTRON
2L_20208828_SNP	20208828	T	T	A	PASS	315111	0.260563	PASS	42451	0.107368	7.43332e-06	0.0127305	Intergenic	Intergenic
2L_2022123_SNP	2022123	T	T	C	AF	34311	0.0310734	PASS	31452	0.142076	2.83412e-05	0.0214356	FBgn0031384	CG4238	INTRON
2L_2022158_SNP	2022158	G	G	T	PASS	36420	0.0520833	PASS	32597	0.229858	2.0827e-08	0.00144982	FBgn0031384	CG4238	INTRON
2L_20238043_SNP	20238043	A	A	T	PASS	26253	0.168254	PASS	228112	0.329412	0.00012571	0.0371039	Intergenic	Intergenic
2L_20238166_SNP	20238166	A	A	C	PASS	234100	0.299401	PASS	169165	0.494012	3.78388e-05	0.023451	Intergenic	Intergenic
2L_20240664_SNP	20240664	C	C	T	PASS	24350	0.170648	PASS	239115	0.324859	0.00026097	0.0493853	Intergenic	Intergenic
2L_20249100_SNP	20249100	A	A	G	PASS	30481	0.21039	PASS	228139	0.378747	7.19461e-05	0.0300968	FBgn0058172	CR40172	EXON
2L_20249100_SNP	20249100	A	A	G	PASS	30481	0.21039	PASS	228139	0.378747	7.19461e-05	0.0300968	FBgn0259996	CR40341	DOWNSTREAM	228
2L_20256102_SNP	20256102	C	C	T	PASS	23476	0.245161	PASS	31935	0.0988701	6.29264e-05	0.0286099	FBgn0259998	CG17571	UTR_3_PRIME
2L_20257010_SNP	20257010	C	C	T	PASS	31922	0.0645161	PASS	28981	0.218919	2.94191e-06	0.00894765	FBgn0259998	CG17571	UPSTREAM	58
2L_20265743_SNP	20265743	G	G	A	PASS	31026	0.077381	PASS	28890	0.238095	3.17146e-06	0.00924851	Intergenic	Intergenic
2L_20284300_SNP	20284300	A	A	G	PASS	32123	0.0668605	PASS	29967	0.18306	0.00020745	0.0453278	Intergenic	Intergenic
2L_20285277_SNP	20285277	C	C	T	PASS	27640	0.126582	PASS	21588	0.290429	4.61e-05	0.0254912	Intergenic	Intergenic
2L_20285278_SNP	20285278	A	A	G	PASS	27439	0.124601	PASS	21388	0.292359	3.16933e-05	0.0219806	Intergenic	Intergenic
2L_20285290_SNP	20285290	A	A	T	PASS	26439	0.128713	PASS	20693	0.311037	1.04784e-05	0.0142845	Intergenic	Intergenic
2L_20293361_SNP	20293361	C	C	T	PASS	38622	0.0539216	PASS	33062	0.158163	0.00020861	0.0453965	Intergenic	Intergenic
2L_20295602_SNP	20295602	T	T	C	PASS	28430	0.0955414	PASS	20971	0.253571	3.4025e-05	0.0227497	FBgn0040996	CG12617	DOWNSTREAM	251
2L_2032014_SNP	2032014	A	A	T	AF	40012	0.0291262	PASS	33044	0.117647	0.0002188	0.0461375	FBgn0011860	tRNA:G3:22BCb	DOWNSTREAM	252
2L_2032014_SNP	2032014	A	A	T	AF	40012	0.0291262	PASS	33044	0.117647	0.0002188	0.0461375	FBgn0259192	CG42296	DOWNSTREAM	55
2L_20321196_SNP	20321196	T	T	C	PASS	18049	0.213974	PASS	14699	0.404082	0.00015051	0.0397958	FBgn0003475	spir	INTRON
2L_20323856_SNP	20323856	G	G	A	PASS	26839	0.127036	PASS	23892	0.278788	0.00011959	0.0364404	FBgn0003475	spir	INTRON
2L_20324519_SNP	20324519	T	T	C	PASS	25718	0.0654546	PASS	25468	0.21118	2.60757e-05	0.0207061	FBgn0003475	spir	INTRON
2L_20326535_SNP	20326535	C	T	C	PASS	22883	0.266881	PASS	187146	0.438438	0.00023891	0.0477705	FBgn0003475	spir	INTRON
2L_20328835_SNP	20328835	G	G	A	PASS	32323	0.066474	PASS	27176	0.21902	4.87756e-06	0.0106839	FBgn0003475	spir	INTRON
2L_20331357_SNP	20331357	T	T	G	PASS	19768	0.256604	PASS	149147	0.496622	1.3144e-06	0.0063702	FBgn0003475	spir	INTRON
2L_20349193_SNP	20349193	C	C	T	PASS	31220	0.060241	PASS	23465	0.217391	3.88755e-06	0.00980843	FBgn0011638	La	SYNONYMOUS_CODING
2L_20349193_SNP	20349193	C	C	T	PASS	31220	0.060241	PASS	23465	0.217391	3.88755e-06	0.00980843	FBgn0003475	spir	DOWNSTREAM	87
2L_20366233_SNP	20366233	C	C	T	PASS	221151	0.405914	PASS	171231	0.574627	0.00025356	0.0488823	FBgn0015803	RtGEF	DOWNSTREAM	979
2L_20372083_SNP	20372083	G	G	T	PASS	36627	0.0687023	PASS	30668	0.181818	0.00021961	0.0462239	FBgn0026756	Ugt37a1	DOWNSTREAM	326
2L_20372104_SNP	20372104	G	G	A	PASS	36025	0.0649351	PASS	32173	0.185279	7.727e-05	0.0308815	FBgn0026756	Ugt37a1	DOWNSTREAM	35
2L_20375248_SNP	20375248	T	T	C	PASS	21477	0.264605	PASS	29136	0.110092	6.484e-05	0.0289273	Intergenic	Intergenic
2L_20379778_SNP	20379778	T	T	A	PASS	23858	0.195946	PASS	28018	0.0604027	5.31927e-05	0.0270065	FBgn0032856	CG16798	INTRON
2L_20393905_SNP	20393905	C	C	T	PASS	22567	0.229452	PASS	33135	0.0956284	0.00019661	0.0444131	FBgn0032857	CG10947	INTRON
2L_20395532_SNP	20395532	A	G	A	PASS	34135	0.0930851	PASS	32897	0.228235	5.61e-05	0.0273541	FBgn0032857	CG10947	INTRON
2L_20417008_SNP	20417008	T	T	A	PASS	31854	0.145161	PASS	282119	0.296758	7.50667e-05	0.03056	FBgn0032859	Arpc2	UPSTREAM	49
2L_20417008_SNP	20417008	T	T	A	PASS	31854	0.145161	PASS	282119	0.296758	7.50667e-05	0.03056	FBgn0032858	CG10949	UPSTREAM	9
2L_20431751_SNP	20431751	G	G	C	PASS	29275	0.20436	PASS	33729	0.079235	0.0001304	0.0376455	FBgn0263355	CG31688	INTRON
2L_20439189_SNP	20439189	A	T	A	PASS	24547	0.160959	PASS	191107	0.35906	7.09515e-06	0.012567	FBgn0263355	CG31688	INTRON
2L_20439189_SNP	20439189	A	T	A	PASS	24547	0.160959	PASS	191107	0.35906	7.09515e-06	0.012567	FBgn0263582	CR43607	UPSTREAM	488
2L_20439416_SNP	20439416	A	G	A	PASS	21546	0.176245	PASS	186104	0.358621	6.34518e-05	0.0286699	FBgn0263355	CG31688	INTRON
2L_20439416_SNP	20439416	A	G	A	PASS	21546	0.176245	PASS	186104	0.358621	6.34518e-05	0.0286699	FBgn0263582	CR43607	UPSTREAM	715
2L_20441325_SNP	20441325	A	A	G	PASS	31641	0.114846	PASS	26491	0.256338	0.00011972	0.0364597	FBgn0263355	CG31688	INTRON
2L_20461477_SNP	20461477	A	A	G	PASS	103152	0.596078	PASS	183122	0.4	0.00013292	0.0378448	FBgn0032863	Cdc23	NON_SYNONYMOUS_CODING
2L_20461477_SNP	20461477	A	A	G	PASS	103152	0.596078	PASS	183122	0.4	0.00013292	0.0378448	FBgn0032864	CG2493	DOWNSTREAM	18
2L_20462297_SNP	20462297	G	A	G	PASS	189107	0.361486	PASS	132179	0.575563	1.66424e-05	0.0174572	FBgn0032864	CG2493	SYNONYMOUS_CODING
2L_20462297_SNP	20462297	G	A	G	PASS	189107	0.361486	PASS	132179	0.575563	1.66424e-05	0.0174572	FBgn0032863	Cdc23	DOWNSTREAM	568
2L_2046244_SNP	2046244	A	A	T	AF	33811	0.0315186	PASS	34157	0.143216	2.25323e-05	0.0194679	FBgn0028952	Kebab	INTRON
2L_2046244_SNP	2046244	A	A	T	AF	33811	0.0315186	PASS	34157	0.143216	2.25323e-05	0.0194679	FBgn0266836	CR45298	UPSTREAM	863
2L_2046438_SNP	2046438	A	A	G	PASS	27877	0.216901	PASS	33733	0.0891892	0.00016321	0.0412046	FBgn0028952	Kebab	NON_SYNONYMOUS_CODING
2L_20467134_SNP	20467134	T	T	C	PASS	32340	0.110193	PASS	292106	0.266332	1.65638e-05	0.0174572	FBgn0266315	CR44980	INTRON
2L_20468430_SNP	20468430	T	T	G	PASS	42530	0.0659341	PASS	30976	0.197403	1.614e-05	0.0172248	FBgn0266315	CR44980	INTRON
2L_20474434_SNP	20474434	T	C	T	PASS	22474	0.248322	PASS	196163	0.454039	9.53101e-06	0.0139413	FBgn0266315	CR44980	INTRON
2L_20474436_SNP	20474436	G	A	G	PASS	23564	0.214047	PASS	218135	0.382436	0.00016049	0.0408804	FBgn0266315	CR44980	INTRON
2L_20474441_SNP	20474441	G	C	G	PASS	22662	0.215278	PASS	216134	0.382857	0.0001965	0.0444131	FBgn0266315	CR44980	INTRON
2L_20474849_SNP	20474849	A	C	A	PASS	29854	0.153409	PASS	269127	0.320707	2.46861e-05	0.0202498	FBgn0266315	CR44980	INTRON
2L_2047694_SNP	2047694	T	A	T	PASS	220175	0.443038	PASS	289104	0.264631	4.72785e-05	0.0258501	FBgn0028952	Kebab	INTRON
2L_2047752_SNP	2047752	C	C	T	PASS	34118	0.0501393	PASS	30670	0.18617	6.86351e-06	0.0123637	FBgn0028952	Kebab	UTR_3_PRIME
2L_2047794_SNP	2047794	G	G	A	PASS	32420	0.0581395	PASS	30270	0.188172	2.818e-05	0.0214344	FBgn0028952	Kebab	UTR_3_PRIME
2L_20480210_SNP	20480210	G	G	T	PASS	29825	0.0773994	PASS	26970	0.20649	0.00013378	0.0379409	FBgn0266315	CR44980	INTRON
2L_20495607_SNP	20495607	G	G	T	PASS	38540	0.0941176	PASS	32191	0.220874	0.00011192	0.0354094	FBgn0054007	CG34007	DOWNSTREAM	51
2L_20495608_SNP	20495608	C	C	T	PASS	38438	0.0900474	PASS	32491	0.219277	7.24719e-05	0.030128	FBgn0054007	CG34007	DOWNSTREAM	52
2L_20499947_SNP	20499947	G	G	C	PASS	26656	0.173913	PASS	31920	0.0589971	0.00021792	0.0461157	Intergenic	Intergenic
2L_20502512_SNP	20502512	T	T	C	PASS	30971	0.186842	PASS	32222	0.0639535	8.16137e-05	0.0315074	Intergenic	Intergenic
2L_20507600_SNP	20507600	C	C	T	PASS	33521	0.0589888	PASS	33472	0.17734	7.74019e-05	0.0308857	Intergenic	Intergenic
2L_20539290_SNP	20539290	A	A	T	PASS	31027	0.0801187	PASS	28171	0.201705	0.00025725	0.0491052	FBgn0267271	CR45707	DOWNSTREAM	13
2L_20541405_SNP	20541405	A	A	T	PASS	24918	0.0674157	PASS	24660	0.196078	0.0001841	0.0431845	Intergenic	Intergenic
2L_20554766_SNP	20554766	C	C	A	PASS	17194	0.354717	PASS	22246	0.171642	6.51324e-05	0.0289296	Intergenic	Intergenic
2L_20561437_SNP	20561437	G	G	A	PASS	19624	0.109091	PASS	18668	0.267717	0.00019006	0.0437161	FBgn0266886	CR45347	UPSTREAM	81
2L_20561437_SNP	20561437	G	G	A	PASS	19624	0.109091	PASS	18668	0.267717	0.00019006	0.0437161	FBgn0263533	mir-4973	UPSTREAM	861
2L_20585217_SNP	20585217	G	G	A	PASS	22122	0.090535	PASS	23374	0.241042	9.17671e-05	0.0329349	FBgn0266214	CR44909	INTRON
2L_20585222_SNP	20585222	G	G	T	PASS	21623	0.0962343	PASS	21570	0.245614	0.00015744	0.0405322	FBgn0266214	CR44909	INTRON
2L_20618840_SNP	20618840	T	T	G	AF	2950	0	PASS	28120	0.0664452	0.00021634	0.0459988	FBgn0266214	CR44909	INTRON
2L_20618840_SNP	20618840	T	T	G	AF	2950	0	PASS	28120	0.0664452	0.00021634	0.0459988	FBgn0262425	mir-288	UPSTREAM	378
2L_20622720_SNP	20622720	G	G	A	PASS	161126	0.439024	PASS	24967	0.212025	1.24201e-06	0.00613585	FBgn0266214	CR44909	INTRON
2L_20622722_SNP	20622722	G	G	T	PASS	164122	0.426573	PASS	25567	0.208075	2.48029e-06	0.00815135	FBgn0266214	CR44909	INTRON
2L_20624057_SNP	20624057	T	T	A	PASS	36631	0.0780856	PASS	31396	0.234719	2.20135e-06	0.007782	FBgn0266214	CR44909	INTRON
2L_20624947_SNP	20624947	C	C	T	PASS	28537	0.114907	PASS	24786	0.258258	0.00015256	0.0400748	FBgn0266214	CR44909	INTRON
2L_20628682_SNP	20628682	G	G	T	AF	35818	0.0478723	PASS	31356	0.151762	0.00020313	0.0450132	Intergenic	Intergenic
2L_20632586_SNP	20632586	C	C	T	PASS	29926	0.08	PASS	31982	0.204489	0.00015878	0.0407217	Intergenic	Intergenic
2L_20641769_SNP	20641769	G	C	G	PASS	25922	0.0782918	PASS	21457	0.210332	0.00025952	0.0492678	FBgn0261058	Sfp38D	DOWNSTREAM	147
2L_20641769_SNP	20641769	G	C	G	PASS	25922	0.0782918	PASS	21457	0.210332	0.00025952	0.0492678	FBgn0032869	CG17470	DOWNSTREAM	537
2L_20661107_SNP	20661107	C	T	C	PASS	202113	0.35873	PASS	161195	0.547753	8.3605e-05	0.0317637	FBgn0051678	CG31678	SYNONYMOUS_CODING
2L_20669973_SNP	20669973	C	C	T	PASS	267132	0.330827	PASS	180197	0.522546	2.595e-05	0.0206564	FBgn0051678	CG31678	INTRON
2L_20674429_SNP	20674429	G	G	T	PASS	32263	0.163636	PASS	34620	0.0546448	0.00017303	0.042193	FBgn0051678	CG31678	INTRON
2L_20675622_SNP	20675622	T	T	A	PASS	23549	0.172535	PASS	30016	0.0506329	0.00010972	0.0351454	FBgn0051678	CG31678	INTRON
2L_20675622_SNP	20675622	T	T	A	PASS	23549	0.172535	PASS	30016	0.0506329	0.00010972	0.0351454	FBgn0086657	ik2	UPSTREAM	423
2L_2068596_SNP	2068596	C	C	T	AF	28112	0.0409556	PASS	23948	0.167247	4.34136e-05	0.024775	FBgn0053516	dpr3	INTRON
2L_2069053_SNP	2069053	A	A	G	AF	32311	0.0329341	PASS	26144	0.144262	6.4072e-05	0.0288121	FBgn0053516	dpr3	INTRON
2L_20703074_SNP	20703074	A	A	G	PASS	17278	0.312	PASS	23842	0.15	0.00023254	0.0472631	FBgn0014859	Hr38	INTRON
2L_20771581_SNP	20771581	C	C	T	PASS	6683	0.557047	PASS	12963	0.328125	0.0001901	0.0437161	FBgn0000251	cad	SYNONYMOUS_CODING
2L_20778943_SNP	20778943	T	A	T	PASS	17786	0.326996	PASS	169182	0.518519	0.00010447	0.0345439	FBgn0000251	cad	INTRON
2L_20778947_SNP	20778947	G	T	G	PASS	17585	0.326923	PASS	173182	0.512676	0.0001669	0.041509	FBgn0000251	cad	INTRON
2L_20799535_SNP	20799535	A	G	A	PASS	164177	0.519062	PASS	252123	0.328	4.29071e-05	0.0246905	FBgn0032886	CG9328	INTRON
2L_20799538_SNP	20799538	T	A	T	PASS	161178	0.525074	PASS	252122	0.326203	2.13887e-05	0.0190976	FBgn0032886	CG9328	INTRON
2L_20799615_SNP	20799615	A	C	A	PASS	132150	0.531915	PASS	20592	0.309764	8.77599e-06	0.0135568	FBgn0032886	CG9328	INTRON
2L_20799626_SNP	20799626	A	C	A	PASS	138156	0.530612	PASS	207104	0.334405	7.17821e-05	0.0300774	FBgn0032886	CG9328	INTRON
2L_2080731_SNP	2080731	T	T	C	PASS	176148	0.45679	PASS	24392	0.274627	9.61614e-05	0.0335489	FBgn0031388	CG12674	SYNONYMOUS_CODING
2L_2080731_SNP	2080731	T	T	C	PASS	176148	0.45679	PASS	24392	0.274627	9.61614e-05	0.0335489	FBgn0053516	dpr3	INTRON
2L_20855685_SNP	20855685	C	C	T	PASS	38125	0.0615764	PASS	31272	0.1875	3.17047e-05	0.0219806	FBgn0032895	twit	INTRON
2L_20855688_SNP	20855688	G	G	C	PASS	38025	0.0617284	PASS	31672	0.185567	3.96221e-05	0.0238431	FBgn0032895	twit	INTRON
2L_20862942_SNP	20862942	T	A	T	PASS	217118	0.352239	PASS	28962	0.176638	3.20422e-05	0.0220567	FBgn0032898	CR9337	INTRON
2L_20881275_SNP	20881275	T	T	G	PASS	34863	0.153285	PASS	287121	0.296569	0.00015332	0.0401519	FBgn0263996	CG43739	INTRON
2L_20881275_SNP	20881275	T	T	G	PASS	34863	0.153285	PASS	287121	0.296569	0.00015332	0.0401519	FBgn0032901	sky	INTRON
2L_2088482_SNP	2088482	A	C	A	PASS	203113	0.357595	PASS	30671	0.188329	7.12426e-05	0.0300334	FBgn0053516	dpr3	INTRON
2L_20885135_SNP	20885135	C	C	T	PASS	40626	0.0601852	PASS	33981	0.192857	8.43347e-06	0.0132741	FBgn0032901	sky	INTRON
2L_20885135_SNP	20885135	C	C	T	PASS	40626	0.0601852	PASS	33981	0.192857	8.43347e-06	0.0132741	FBgn0263996	CG43739	INTRON
2L_2088520_SNP	2088520	C	T	C	PASS	207106	0.338658	PASS	31366	0.174142	8.31148e-05	0.0316936	FBgn0053516	dpr3	INTRON
2L_2088547_SNP	2088547	C	C	G	PASS	26376	0.224189	PASS	215140	0.394366	0.00011353	0.0356502	FBgn0053516	dpr3	INTRON
2L_20905986_SNP	20905986	T	T	G	PASS	254109	0.300275	PASS	213205	0.490431	2.40731e-05	0.0201066	FBgn0263996	CG43739	INTRON
2L_20905986_SNP	20905986	T	T	G	PASS	254109	0.300275	PASS	213205	0.490431	2.40731e-05	0.0201066	FBgn0032901	sky	INTRON
2L_2091111_SNP	2091111	T	T	C	AF	31512	0.0366973	PASS	30050	0.142857	0.00011265	0.0354988	FBgn0053516	dpr3	INTRON
2L_2093382_SNP	2093382	A	T	A	PASS	177196	0.525469	PASS	235126	0.34903	0.00014762	0.0395174	FBgn0053516	dpr3	INTRON
2L_2093448_SNP	2093448	T	C	T	PASS	189214	0.531017	PASS	271135	0.332512	1.05877e-05	0.0143622	FBgn0053516	dpr3	INTRON
2L_2093458_SNP	2093458	T	G	T	PASS	200218	0.521531	PASS	285132	0.316547	4.03893e-06	0.00986533	FBgn0053516	dpr3	INTRON
2L_2094277_SNP	2094277	T	T	C	AF	33912	0.034188	PASS	27249	0.152648	2.42677e-05	0.0201844	FBgn0053516	dpr3	INTRON
2L_2094283_SNP	2094283	T	T	A	AF	34913	0.0359116	PASS	27749	0.150307	3.91346e-05	0.0237888	FBgn0053516	dpr3	INTRON
2L_20951957_SNP	20951957	A	C	A	PASS	32243	0.117808	PASS	28295	0.251989	0.00021546	0.0459291	Intergenic	Intergenic
2L_20962594_SNP	20962594	C	C	T	PASS	25131	0.109929	PASS	23587	0.270186	4.3577e-05	0.0248095	Intergenic	Intergenic
2L_2096924_SNP	2096924	G	G	T	PASS	29454	0.155172	PASS	212102	0.324841	4.14324e-05	0.0242743	FBgn0053516	dpr3	INTRON
2L_2096955_SNP	2096955	C	G	C	PASS	24591	0.270833	PASS	30633	0.0973451	3.28665e-06	0.00934282	FBgn0053516	dpr3	INTRON
2L_2096966_SNP	2096966	C	T	C	PASS	23784	0.261682	PASS	30033	0.0990991	1.36617e-05	0.0160539	FBgn0053516	dpr3	INTRON
2L_2096992_SNP	2096992	A	A	T	PASS	31257	0.154472	PASS	237116	0.328612	1.5716e-05	0.017055	FBgn0053516	dpr3	INTRON
2L_2097004_SNP	2097004	G	G	A	PASS	30453	0.148459	PASS	227118	0.342029	2.20254e-06	0.007782	FBgn0053516	dpr3	INTRON
2L_2097058_SNP	2097058	C	C	T	PASS	27643	0.134796	PASS	242100	0.292398	7.25149e-05	0.030128	FBgn0053516	dpr3	INTRON
2L_2097178_SNP	2097178	C	T	C	PASS	162139	0.461794	PASS	23595	0.287879	0.00026175	0.0494584	FBgn0053516	dpr3	INTRON
2L_2097184_SNP	2097184	G	A	G	PASS	23882	0.25625	PASS	32933	0.0911602	5.67948e-06	0.0114878	FBgn0053516	dpr3	INTRON
2L_2097332_SNP	2097332	G	G	T	AF	37512	0.0310078	PASS	34948	0.120907	0.00022036	0.0462859	FBgn0053516	dpr3	INTRON
2L_2097355_SNP	2097355	G	G	T	AF	36112	0.0321716	PASS	29658	0.163842	2.47299e-06	0.00815135	FBgn0053516	dpr3	INTRON
2L_20976336_SNP	20976336	A	T	A	PASS	175198	0.530831	PASS	232131	0.360882	0.00026104	0.0493853	FBgn0250867	CG42238	INTRON
2L_2097689_SNP	2097689	A	G	A	PASS	157167	0.515432	PASS	242105	0.302594	7.16827e-06	0.012604	FBgn0053516	dpr3	INTRON
2L_21016183_SNP	21016183	T	T	G	AF	3980	0	PASS	34525	0.0675676	5.23627e-05	0.0268576	FBgn0250867	CG42238	INTRON
2L_21064679_SNP	21064679	A	A	T	PASS	29668	0.186813	PASS	33024	0.0677966	0.00015446	0.0402861	FBgn0032910	CG9265	INTRON
2L_21084334_SNP	21084334	T	A	T	PASS	190232	0.549763	PASS	270165	0.37931	0.00013312	0.0378658	FBgn0053510	CG33510	UPSTREAM	8
2L_21084334_SNP	21084334	T	A	T	PASS	190232	0.549763	PASS	270165	0.37931	0.00013312	0.0378658	FBgn0053509	CG33509	DOWNSTREAM	271
2L_21086798_SNP	21086798	C	C	T	PASS	31295	0.233415	PASS	38441	0.0964706	4.33177e-05	0.0247538	FBgn0053508	ppk13	UTR_3_PRIME
2L_21086798_SNP	21086798	C	C	T	PASS	31295	0.233415	PASS	38441	0.0964706	4.33177e-05	0.0247538	FBgn0053509	CG33509	UPSTREAM	292
2L_2109979_SNP	2109979	A	C	A	PASS	157101	0.391473	PASS	117164	0.58363	0.00021164	0.0456001	FBgn0053516	dpr3	UPSTREAM	11
2L_21101397_SNP	21101397	C	C	T	PASS	26996	0.263014	PASS	32244	0.120219	0.00011041	0.0352167	FBgn0032915	CG12050	NON_SYNONYMOUS_CODING
2L_21101729_SNP	21101729	T	T	C	PASS	25124	0.0872727	PASS	26975	0.218023	0.00025405	0.0488878	FBgn0032915	CG12050	NON_SYNONYMOUS_CODING
2L_21101729_SNP	21101729	T	T	C	PASS	25124	0.0872727	PASS	26975	0.218023	0.00025405	0.0488878	FBgn0264353	CR43809	DOWNSTREAM	857
2L_2110531_SNP	2110531	T	T	A	PASS	186187	0.50134	PASS	279139	0.332536	0.00018843	0.043545	FBgn0053516	dpr3	UPSTREAM	653
2L_2110735_SNP	2110735	G	G	C	PASS	32389	0.216019	PASS	254171	0.402353	7.60275e-06	0.012795	FBgn0053516	dpr3	UPSTREAM	857
2L_21110621_SNP	21110621	G	G	A	PASS	32163	0.164062	PASS	36622	0.056701	0.00020492	0.0451222	FBgn0040297	Nhe2	INTRON
2L_2111221_SNP	2111221	T	T	G	PASS	25952	0.167203	PASS	33619	0.0535211	0.00017761	0.0426278	Intergenic	Intergenic
2L_21112395_SNP	21112395	C	C	G	PASS	29040	0.121212	PASS	242114	0.320225	5.43338e-07	0.00462332	FBgn0040297	Nhe2	INTRON
2L_21142026_SNP	21142026	C	G	C	PASS	33475	0.183374	PASS	237121	0.337989	0.00014234	0.0389299	FBgn0023388	Dap160	INTRON
2L_21148996_SNP	21148996	C	G	C	PASS	33461	0.15443	PASS	289136	0.32	1.75753e-05	0.0178018	FBgn0086251	del	UPSTREAM	45
2L_21173050_SNP	21173050	A	G	A	PASS	288139	0.325527	PASS	219224	0.505643	4.06935e-05	0.0241175	FBgn0010100	Acon	DOWNSTREAM	33
2L_21173050_SNP	21173050	A	G	A	PASS	288139	0.325527	PASS	219224	0.505643	4.06935e-05	0.0241175	FBgn0051627	CG31627	UPSTREAM	172
2L_21191929_SNP	21191929	T	T	G	PASS	32259	0.154856	PASS	268119	0.307494	8.95053e-05	0.0325751	FBgn0011829	Ret	INTRON
2L_2121578_SNP	2121578	C	C	G	PASS	21276	0.263889	PASS	28035	0.111111	8.92376e-05	0.0325472	Intergenic	Intergenic
2L_2121768_SNP	2121768	G	G	A	AF	34211	0.0311615	PASS	31054	0.148352	1.40764e-05	0.016297	Intergenic	Intergenic
2L_2122486_SNP	2122486	G	G	T	PASS	30222	0.0679012	PASS	26971	0.208824	2.4603e-05	0.0202326	Intergenic	Intergenic
2L_21233716_SNP	21233716	G	G	T	PASS	28821	0.0679612	PASS	25671	0.217125	1.37167e-05	0.0160726	FBgn0267277	CR45713	EXON
2L_21233716_SNP	21233716	G	G	T	PASS	28821	0.0679612	PASS	25671	0.217125	1.37167e-05	0.0160726	FBgn0051626	CG31626	UTR_5_PRIME
2L_2126972_SNP	2126972	G	G	C	AF	30710	0.0315457	PASS	26743	0.13871	9.77171e-05	0.0337358	FBgn0031389	CG4259	DOWNSTREAM	337
2L_21286445_SNP	21286445	T	T	A	PASS	32423	0.0662824	PASS	30372	0.192	6.95687e-05	0.0297524	FBgn0032940	Mio	INTRON
2L_2132649_SNP	2132649	T	T	A	AF	30713	0.040625	PASS	30958	0.158038	4.19746e-05	0.0244609	FBgn0004507	GlyP	INTRON
2L_2133373_SNP	2133373	C	C	T	AF	36414	0.037037	PASS	34561	0.150246	2.34327e-05	0.019818	FBgn0004507	GlyP	INTRON
2L_21340809_SNP	21340809	G	G	A	PASS	38027	0.0663391	PASS	32585	0.207317	6.12535e-06	0.0117731	FBgn0023091	dimm	DOWNSTREAM	267
2L_21340851_SNP	21340851	G	G	A	PASS	38826	0.0628019	PASS	33977	0.185096	3.952e-05	0.0238183	FBgn0023091	dimm	DOWNSTREAM	39
2L_21344683_SNP	21344683	C	C	T	PASS	33331	0.0851648	PASS	28882	0.221622	5.33639e-05	0.0270065	FBgn0032943	Tsp39D	UTR_5_PRIME
2L_2134612_SNP	2134612	T	T	C	PASS	22715	0.0619835	PASS	20752	0.200772	0.00011322	0.0355964	FBgn0004507	GlyP	SYNONYMOUS_CODING
2L_2134903_SNP	2134903	C	C	T	PASS	22812	0.05	PASS	22246	0.171642	0.00025572	0.0490075	FBgn0004507	GlyP	SYNONYMOUS_CODING
2L_2137601_SNP	2137601	T	T	C	AF	32611	0.032641	PASS	27658	0.173653	1.51737e-06	0.0067948	FBgn0031390	tho2	UTR_3_PRIME
2L_2137601_SNP	2137601	T	T	C	AF	32611	0.032641	PASS	27658	0.173653	1.51737e-06	0.0067948	FBgn0004507	GlyP	DOWNSTREAM	35
2L_21380352_SNP	21380352	A	C	A	PASS	28518	0.0594059	PASS	29964	0.176309	0.00018272	0.0430271	FBgn0032946	nrv3	UTR_5_PRIME
2L_21409655_SNP	21409655	G	G	A	PASS	30049	0.140401	PASS	279118	0.297229	4.8516e-05	0.0260551	Intergenic	Intergenic
2L_2141090_SNP	2141090	G	G	C	AF	37316	0.0411311	PASS	28659	0.171014	6.93474e-06	0.0124216	FBgn0031390	tho2	INTRON
2L_2145803_SNP	2145803	G	G	A	AF	36310	0.0268097	PASS	34752	0.130326	3.07381e-05	0.0217336	FBgn0031391	CG11723	UTR_3_PRIME
2L_2145803_SNP	2145803	G	G	A	AF	36310	0.0268097	PASS	34752	0.130326	3.07381e-05	0.0217336	FBgn0031390	tho2	UPSTREAM	616
2L_2146009_SNP	2146009	G	G	A	PASS	28116	0.053872	PASS	27456	0.169697	0.00019429	0.0442254	FBgn0031391	CG11723	NON_SYNONYMOUS_CODING
2L_2146009_SNP	2146009	G	G	A	PASS	28116	0.053872	PASS	27456	0.169697	0.00019429	0.0442254	FBgn0031390	tho2	UPSTREAM	822
2L_2155225_SNP	2155225	G	A	G	PASS	240105	0.304348	PASS	33459	0.150127	8.54965e-05	0.0320923	FBgn0031392	AIF	DOWNSTREAM	12
2L_2155225_SNP	2155225	G	A	G	PASS	240105	0.304348	PASS	33459	0.150127	8.54965e-05	0.0320923	FBgn0031393	CG15382	UPSTREAM	528
2L_2157705_SNP	2157705	C	C	A	PASS	211188	0.471178	PASS	287128	0.308434	0.00023877	0.0477508	FBgn0000097	aop	UTR_3_PRIME
2L_2157705_SNP	2157705	C	C	A	PASS	211188	0.471178	PASS	287128	0.308434	0.00023877	0.0477508	FBgn0031393	CG15382	DOWNSTREAM	915
2L_21592535_SNP	21592535	A	A	G	PASS	31218	0.0545455	PASS	34371	0.171498	8.07147e-05	0.0313898	Intergenic	Intergenic
2L_2160816_SNP	2160816	C	C	T	AF	33712	0.034384	PASS	29548	0.139942	8.86e-05	0.0324751	FBgn0000097	aop	INTRON
2L_2161171_SNP	2161171	G	G	A	AF	31113	0.0401235	PASS	26049	0.158576	5.58221e-05	0.0273186	FBgn0000097	aop	INTRON
2L_2162219_SNP	2162219	G	G	A	AF	36911	0.0289474	PASS	35057	0.140049	1.3445e-05	0.0159553	FBgn0000097	aop	INTRON
2L_2162273_SNP	2162273	C	C	G	AF	33310	0.0291545	PASS	31645	0.124654	0.00016052	0.0408804	FBgn0000097	aop	INTRON
2L_2165231_SNP	2165231	G	G	T	AF	33312	0.0347826	PASS	34860	0.147059	2.77653e-05	0.0213409	FBgn0000097	aop	INTRON
2L_2166588_SNP	2166588	A	A	T	AF	34511	0.0308989	PASS	31651	0.138965	3.84562e-05	0.023585	FBgn0000097	aop	INTRON
2L_2166666_SNP	2166666	T	T	C	PASS	34020	0.0555556	PASS	30860	0.163043	0.00024598	0.0482778	FBgn0000097	aop	INTRON
2L_216918_SNP	216918	T	T	C	PASS	196135	0.407855	PASS	24465	0.210356	1.27734e-05	0.0157348	FBgn0266557	kis	SYNONYMOUS_CODING
2L_21713744_SNP	21713744	A	A	T	PASS	32231	0.0878187	PASS	30481	0.21039	0.00023702	0.0476236	FBgn0051619	CG31619	INTRON
2L_21757208_SNP	21757208	G	G	A	PASS	33335	0.0951087	PASS	26275	0.222552	0.00024107	0.0478666	FBgn0086779	step	NON_SYNONYMOUS_CODING
2L_21757208_SNP	21757208	G	G	A	PASS	33335	0.0951087	PASS	26275	0.222552	0.00024107	0.0478666	FBgn0032961	CG1416	UPSTREAM	82
2L_21764965_SNP	21764965	C	G	C	PASS	29949	0.140805	PASS	241101	0.295322	9.00283e-05	0.032639	FBgn0051612	CG31612	INTRON
2L_21774083_SNP	21774083	T	T	C	PASS	29123	0.0732484	PASS	30577	0.201571	9.63632e-05	0.0335939	FBgn0051612	CG31612	NON_SYNONYMOUS_CODING
2L_21787359_SNP	21787359	G	G	A	PASS	28525	0.0806452	PASS	29776	0.203753	0.00024545	0.0482107	FBgn0051612	CG31612	INTRON
2L_2181261_SNP	2181261	C	C	T	PASS	26287	0.249284	PASS	213151	0.414835	0.00020193	0.0449049	FBgn0265017	CR43751	UPSTREAM	71
2L_21883121_SNP	21883121	C	C	A	PASS	29261	0.172805	AF	38719	0.046798	1.4333e-05	0.016435	Intergenic	Intergenic
2L_21883125_SNP	21883125	C	C	T	PASS	29859	0.165266	AF	38320	0.0496278	5.74869e-05	0.0275988	Intergenic	Intergenic
2L_22002895_SNP	22002895	G	G	A	PASS	24048	0.166667	PASS	191101	0.34589	4.93368e-05	0.0262674	Intergenic	Intergenic
2L_2204413_SNP	2204413	A	A	G	PASS	174168	0.491228	PASS	236101	0.299703	4.5356e-05	0.0252837	FBgn0051668	CG31668	NON_SYNONYMOUS_CODING
2L_2206342_SNP	2206342	T	T	G	PASS	226209	0.48046	PASS	312124	0.284404	5.85709e-06	0.0115742	FBgn0051668	CG31668	UPSTREAM	176
2L_2206342_SNP	2206342	T	T	G	PASS	226209	0.48046	PASS	312124	0.284404	5.85709e-06	0.0115742	FBgn0053124	CG33124	DOWNSTREAM	183
2L_2207769_SNP	2207769	G	G	A	PASS	141145	0.506993	PASS	22599	0.305556	3.8096e-05	0.0234673	FBgn0053124	CG33124	SYNONYMOUS_CODING
2L_2207858_SNP	2207858	C	C	T	PASS	151157	0.50974	PASS	24097	0.287834	3.51599e-06	0.0095725	FBgn0053124	CG33124	NON_SYNONYMOUS_CODING
2L_2207871_SNP	2207871	T	T	C	PASS	153148	0.491694	PASS	24798	0.284058	1.30332e-05	0.0158078	FBgn0053124	CG33124	SYNONYMOUS_CODING
2L_2207873_SNP	2207873	G	G	T	PASS	149151	0.503333	PASS	24397	0.285294	5.32057e-06	0.0110561	FBgn0053124	CG33124	NON_SYNONYMOUS_CODING
2L_2209768_SNP	2209768	A	A	T	PASS	31861	0.16095	PASS	37121	0.0535714	0.00017078	0.0419981	FBgn0031397	CG15385	DOWNSTREAM	178
2L_2209768_SNP	2209768	A	A	T	PASS	31861	0.16095	PASS	37121	0.0535714	0.00017078	0.0419981	FBgn0053124	CG33124	UPSTREAM	666
2L_2209804_SNP	2209804	A	A	T	PASS	36458	0.137441	AF	39818	0.0432692	0.00026406	0.049693	FBgn0031397	CG15385	DOWNSTREAM	142
2L_2209804_SNP	2209804	A	A	T	PASS	36458	0.137441	AF	39818	0.0432692	0.00026406	0.049693	FBgn0053124	CG33124	UPSTREAM	72
2L_22100682_SNP	22100682	C	T	C	PASS	30567	0.180108	PASS	285145	0.337209	8.60759e-05	0.0321461	Intergenic	Intergenic
2L_221136_SNP	221136	C	G	C	PASS	22667	0.228669	PASS	199158	0.442577	3.55078e-06	0.0095725	FBgn0266557	kis	INTRON
2L_22130882_SNP	22130882	C	A	C	PASS	215169	0.440104	PASS	298111	0.271394	0.00011856	0.0362976	FBgn0262885	CR43240	DOWNSTREAM	144
2L_22130882_SNP	22130882	C	A	C	PASS	215169	0.440104	PASS	298111	0.271394	0.00011856	0.0362976	FBgn0262886	CR43241	UPSTREAM	339
2L_22130882_SNP	22130882	C	A	C	PASS	215169	0.440104	PASS	298111	0.271394	0.00011856	0.0362976	FBgn0261802	CG42748	UPSTREAM	339
2L_22130882_SNP	22130882	C	A	C	PASS	215169	0.440104	PASS	298111	0.271394	0.00011856	0.0362976	FBgn0025674	CycK	UPSTREAM	74
2L_22142335_SNP	22142335	A	A	G	PASS	25940	0.133779	PASS	209100	0.323625	5.63317e-06	0.0114257	FBgn0261802	CG42748	NON_SYNONYMOUS_CODING
2L_22189785_SNP	22189785	C	C	T	PASS	30427	0.081571	PASS	30083	0.21671	6.16171e-05	0.028355	FBgn0259683	Ir40a	SYNONYMOUS_CODING
2L_22190279_SNP	22190279	C	C	T	PASS	30672	0.190476	PASS	39028	0.0669856	5.57378e-05	0.0273186	FBgn0259683	Ir40a	INTRON
2L_22219553_SNP	22219553	G	G	A	PASS	33247	0.124011	PASS	25494	0.270115	9.40855e-05	0.0332695	Intergenic	Intergenic
2L_22244615_SNP	22244615	G	G	A	PASS	28747	0.140719	PASS	257108	0.29589	7.98536e-05	0.0312275	FBgn0032986	CG3262	UTR_3_PRIME
2L_2225903_SNP	2225903	T	T	C	AF	28612	0.0402685	PASS	27756	0.168168	2.11911e-05	0.0189899	FBgn0031403	CG15387	SYNONYMOUS_CODING
2L_2225903_SNP	2225903	T	T	C	AF	28612	0.0402685	PASS	27756	0.168168	2.11911e-05	0.0189899	FBgn0031401	papi	DOWNSTREAM	359
2L_2225903_SNP	2225903	T	T	C	AF	28612	0.0402685	PASS	27756	0.168168	2.11911e-05	0.0189899	FBgn0010704	rti	UPSTREAM	439
2L_2225903_SNP	2225903	T	T	C	AF	28612	0.0402685	PASS	27756	0.168168	2.11911e-05	0.0189899	FBgn0264945	CR44114	DOWNSTREAM	85
2L_22297455_SNP	22297455	C	C	A	PASS	31258	0.156757	PASS	270134	0.331683	1.01778e-05	0.0141576	Intergenic	Intergenic
2L_22316551_SNP	22316551	T	T	A	PASS	23944	0.155477	PASS	227106	0.318318	0.00011568	0.0360514	FBgn0039972	CG17018	INTRON
2L_22317654_SNP	22317654	C	C	T	PASS	23233	0.124528	PASS	18277	0.297297	5.25918e-05	0.0268881	FBgn0039972	CG17018	INTRON
2L_22346074_SNP	22346074	T	T	C	PASS	27624	0.08	PASS	24468	0.217949	9.645e-05	0.0335939	FBgn0039972	CG17018	INTRON
2L_22346128_SNP	22346128	A	A	C	PASS	27221	0.0716723	PASS	22770	0.23569	6.11479e-06	0.0117731	FBgn0039972	CG17018	INTRON
2L_22346312_SNP	22346312	T	T	A	PASS	108138	0.560976	PASS	199116	0.368254	0.0001713	0.0420183	FBgn0039972	CG17018	INTRON
2L_22349849_SNP	22349849	A	A	T	PASS	25723	0.0821429	PASS	24470	0.22293	9.68489e-05	0.0336582	FBgn0039972	CG17018	INTRON
2L_22349851_SNP	22349851	C	C	A	PASS	25723	0.0821429	PASS	24172	0.230032	5.02156e-05	0.02642	FBgn0039972	CG17018	INTRON
2L_22368596_SNP	22368596	A	T	A	PASS	22690	0.28481	PASS	183156	0.460177	0.00019014	0.0437161	FBgn0039972	CG17018	UTR_3_PRIME
2L_2241644_SNP	2241644	C	C	G	AF	30213	0.0412698	PASS	30151	0.144886	0.00022564	0.0468125	FBgn0264979	CG4267	UPSTREAM	734
2L_22421531_SNP	22421531	C	C	T	PASS	24563	0.204545	PASS	213140	0.396601	1.57916e-05	0.017055	Intergenic	Intergenic
2L_22430533_SNP	22430533	T	G	T	PASS	286112	0.281407	PASS	207168	0.448	0.000176	0.0424546	FBgn0040009	CG17490	START_GAINED
2L_22430533_SNP	22430533	T	G	T	PASS	286112	0.281407	PASS	207168	0.448	0.000176	0.0424546	FBgn0064225	RpL5	UPSTREAM	917
2L_2246211_SNP	2246211	A	A	T	AF	34713	0.0361111	PASS	32060	0.157895	1.07857e-05	0.0144896	FBgn0262106	CR42859	DOWNSTREAM	4
2L_2246211_SNP	2246211	A	A	T	AF	34713	0.0361111	PASS	32060	0.157895	1.07857e-05	0.0144896	FBgn0264979	CG4267	DOWNSTREAM	937
2L_2246227_SNP	2246227	A	G	A	PASS	36034	0.0862944	PASS	30780	0.206718	0.00021261	0.0456938	FBgn0262106	CR42859	DOWNSTREAM	2
2L_2246227_SNP	2246227	A	G	A	PASS	36034	0.0862944	PASS	30780	0.206718	0.00021261	0.0456938	FBgn0264979	CG4267	DOWNSTREAM	953
2L_2246258_SNP	2246258	C	C	G	AF	35413	0.0354223	PASS	33657	0.145038	3.70871e-05	0.0233834	FBgn0262106	CR42859	DOWNSTREAM	51
2L_2246258_SNP	2246258	C	C	G	AF	35413	0.0354223	PASS	33657	0.145038	3.70871e-05	0.0233834	FBgn0264979	CG4267	DOWNSTREAM	984
2L_22463511_SNP	22463511	T	C	T	PASS	7321	0.223404	PASS	5059	0.541284	1.71127e-05	0.0176695	Intergenic	Intergenic
2L_2248449_SNP	2248449	T	T	A	PASS	177195	0.524194	PASS	266144	0.35122	0.00015028	0.0397767	Intergenic	Intergenic
2L_224964_SNP	224964	T	T	G	PASS	243169	0.410194	PASS	324103	0.241218	6.18288e-05	0.028359	FBgn0266557	kis	INTRON
2L_224964_SNP	224964	T	T	G	PASS	243169	0.410194	PASS	324103	0.241218	6.18288e-05	0.028359	FBgn0265153	CR44222	DOWNSTREAM	256
2L_2252376_SNP	2252376	T	T	C	PASS	195132	0.40367	PASS	28773	0.202778	5.01315e-06	0.0107831	FBgn0042186	CG17239	UPSTREAM	35
2L_2252376_SNP	2252376	T	T	C	PASS	195132	0.40367	PASS	28773	0.202778	5.01315e-06	0.0107831	FBgn0042187	CG17234	UPSTREAM	669
2L_2259031_SNP	2259031	A	G	A	AF	3239	0.0271084	PASS	29242	0.125749	0.00012215	0.0366425	FBgn0266023	CR44788	DOWNSTREAM	365
2L_2260889_SNP	2260889	A	A	T	AF	24112	0.0474308	PASS	20842	0.168	0.00025142	0.0487578	Intergenic	Intergenic
2L_2260971_SNP	2260971	C	C	T	AF	29412	0.0392157	PASS	27947	0.144172	0.00021681	0.046039	Intergenic	Intergenic
2L_2261201_SNP	2261201	G	A	G	PASS	33134	0.0931507	PASS	27480	0.225989	0.00012031	0.0365084	Intergenic	Intergenic
2L_22617465_SNP	22617465	A	A	C	PASS	25448	0.15894	PASS	217111	0.338415	2.47259e-05	0.0202534	FBgn0058006	CG40006	INTRON
2L_22622039_SNP	22622039	C	C	T	PASS	21535	0.14	PASS	19294	0.328671	1.86788e-05	0.0181802	FBgn0058006	CG40006	INTRON
2L_2262325_SNP	2262325	A	A	G	PASS	28063	0.183673	PASS	209133	0.388889	2.1347e-06	0.007782	Intergenic	Intergenic
2L_2262421_SNP	2262421	G	G	C	PASS	25982	0.240469	PASS	197140	0.41543	0.00010512	0.0346225	Intergenic	Intergenic
2L_2264518_SNP	2264518	T	C	T	PASS	229110	0.324484	PASS	193192	0.498701	0.00017222	0.0421258	FBgn0054049	CG34049	SYNONYMOUS_CODING
2L_2264518_SNP	2264518	T	C	T	PASS	229110	0.324484	PASS	193192	0.498701	0.00017222	0.0421258	FBgn0031407	CG4270	DOWNSTREAM	277
2L_2264653_SNP	2264653	A	A	G	PASS	37421	0.0531646	PASS	33170	0.174564	2.912e-05	0.0215171	FBgn0054049	CG34049	SYNONYMOUS_CODING
2L_2264653_SNP	2264653	A	A	G	PASS	37421	0.0531646	PASS	33170	0.174564	2.912e-05	0.0215171	FBgn0031407	CG4270	DOWNSTREAM	412
2L_2264683_SNP	2264683	T	T	G	AF	35716	0.0428954	PASS	32956	0.145455	0.00015439	0.0402861	FBgn0054049	CG34049	NON_SYNONYMOUS_CODING
2L_2264683_SNP	2264683	T	T	G	AF	35716	0.0428954	PASS	32956	0.145455	0.00015439	0.0402861	FBgn0031407	CG4270	DOWNSTREAM	442
2L_2264756_SNP	2264756	A	A	T	AF	34111	0.03125	PASS	31046	0.129213	0.0001419	0.0388775	FBgn0054049	CG34049	INTRON
2L_2264756_SNP	2264756	A	A	T	AF	34111	0.03125	PASS	31046	0.129213	0.0001419	0.0388775	FBgn0031407	CG4270	DOWNSTREAM	515
2L_22700083_SNP	22700083	A	A	C	PASS	28819	0.0618892	PASS	23463	0.212121	1.19579e-05	0.0152716	Intergenic	Intergenic
2L_22700515_SNP	22700515	A	A	T	PASS	38752	0.118451	PASS	322116	0.26484	2.839e-05	0.0214422	Intergenic	Intergenic
2L_22834173_SNP	22834173	C	C	T	PASS	33552	0.134367	PASS	371133	0.263889	0.00026353	0.0496365	FBgn0002566	lt	DOWNSTREAM	818
2L_2283437_SNP	2283437	G	G	C	AF	32816	0.0465116	PASS	30254	0.151685	0.00021541	0.0459291	FBgn0264085	CR43754	DOWNSTREAM	268
2L_22869857_SNP	22869857	T	T	G	PASS	254101	0.284507	PASS	206170	0.452128	0.00021357	0.045758	Intergenic	Intergenic
2L_22902168_SNP	22902168	A	G	A	PASS	33760	0.151134	PASS	281118	0.295739	0.00014638	0.039442	FBgn0250907	Cht3	INTRON
2L_22917433_SNP	22917433	A	A	G	PASS	161207	0.5625	PASS	212102	0.324841	6.43408e-07	0.0047313	FBgn0250907	Cht3	INTRON
2L_22921823_SNP	22921823	C	C	T	AF	31910	0.0303951	PASS	30043	0.125364	0.00023587	0.0475242	Intergenic	Intergenic
2L_2299809_SNP	2299809	A	A	G	PASS	21871	0.245675	PASS	138129	0.483146	1.53581e-06	0.00683164	FBgn0051949	CG31949	UPSTREAM	294
2L_2302969_SNP	2302969	C	C	A	PASS	208110	0.345912	PASS	26249	0.157556	1.04332e-05	0.0142663	Intergenic	Intergenic
2L_2306782_SNP	2306782	T	T	A	PASS	116188	0.618421	PASS	221137	0.382682	1.18113e-06	0.00601256	Intergenic	Intergenic
2L_2307286_SNP	2307286	C	C	T	PASS	131175	0.571895	PASS	198126	0.388889	0.00019803	0.0445608	FBgn0031412	CG16995	UPSTREAM	662
2L_2307650_SNP	2307650	A	A	T	PASS	294122	0.293269	PASS	33759	0.14899	0.00013095	0.0376727	FBgn0031412	CG16995	UPSTREAM	298
2L_2308943_SNP	2308943	G	G	A	AF	32010	0.030303	PASS	35349	0.121891	0.00024117	0.0478737	FBgn0031413	CG9967	SYNONYMOUS_CODING
2L_2308943_SNP	2308943	G	G	A	AF	32010	0.030303	PASS	35349	0.121891	0.00024117	0.0478737	FBgn0031412	CG16995	DOWNSTREAM	71
2L_2311114_SNP	2311114	G	G	A	PASS	7177	0.52027	PASS	10739	0.267123	6.861e-05	0.0295325	FBgn0031413	CG9967	INTRON
2L_2311114_SNP	2311114	G	G	A	PASS	7177	0.52027	PASS	10739	0.267123	6.861e-05	0.0295325	FBgn0031414	eys	UPSTREAM	566
2L_2317724_SNP	2317724	T	T	A	PASS	186117	0.386139	PASS	21650	0.18797	1.7322e-05	0.0177166	FBgn0031413	CG9967	INTRON
2L_2317724_SNP	2317724	T	T	A	PASS	186117	0.386139	PASS	21650	0.18797	1.7322e-05	0.0177166	FBgn0031414	eys	INTRON
2L_2317966_SNP	2317966	G	G	A	PASS	216102	0.320755	PASS	28857	0.165217	0.00018028	0.0428534	FBgn0031413	CG9967	INTRON
2L_2317966_SNP	2317966	G	G	A	PASS	216102	0.320755	PASS	28857	0.165217	0.00018028	0.0428534	FBgn0031414	eys	INTRON
2L_2318059_SNP	2318059	G	A	G	PASS	146134	0.478571	PASS	20985	0.289116	0.00012434	0.0369402	FBgn0031414	eys	INTRON
2L_2318059_SNP	2318059	G	A	G	PASS	146134	0.478571	PASS	20985	0.289116	0.00012434	0.0369402	FBgn0031413	CG9967	INTRON
2L_2325641_SNP	2325641	T	C	T	PASS	210150	0.416667	PASS	29177	0.209239	1.9272e-06	0.00732097	FBgn0031413	CG9967	INTRON
2L_2325641_SNP	2325641	T	C	T	PASS	210150	0.416667	PASS	29177	0.209239	1.9272e-06	0.00732097	FBgn0031414	eys	INTRON
2L_2325649_SNP	2325649	T	A	T	PASS	28768	0.191549	PASS	34926	0.0693333	0.00011124	0.0353277	FBgn0031413	CG9967	INTRON
2L_2325649_SNP	2325649	T	A	T	PASS	28768	0.191549	PASS	34926	0.0693333	0.00011124	0.0353277	FBgn0031414	eys	INTRON
2L_2326046_SNP	2326046	T	A	T	PASS	236147	0.383812	PASS	26877	0.223188	0.0002031	0.0450132	FBgn0031413	CG9967	INTRON
2L_2326046_SNP	2326046	T	A	T	PASS	236147	0.383812	PASS	26877	0.223188	0.0002031	0.0450132	FBgn0031414	eys	INTRON
2L_2331130_SNP	2331130	A	A	G	PASS	27087	0.243697	PASS	34332	0.0853333	5.28396e-06	0.0110191	FBgn0031413	CG9967	INTRON
2L_2331130_SNP	2331130	A	A	G	PASS	27087	0.243697	PASS	34332	0.0853333	5.28396e-06	0.0110191	FBgn0031414	eys	INTRON
2L_2344842_SNP	2344842	A	A	T	PASS	170194	0.532967	PASS	257142	0.35589	0.00012021	0.0365084	FBgn0031413	CG9967	INTRON
2L_2344842_SNP	2344842	A	A	T	PASS	170194	0.532967	PASS	257142	0.35589	0.00012021	0.0365084	FBgn0031414	eys	INTRON
2L_2345053_SNP	2345053	T	T	A	PASS	172107	0.383513	PASS	122178	0.593333	3.38549e-05	0.0227106	FBgn0031413	CG9967	INTRON
2L_2345053_SNP	2345053	T	T	A	PASS	172107	0.383513	PASS	122178	0.593333	3.38549e-05	0.0227106	FBgn0031414	eys	INTRON
2L_2347976_SNP	2347976	C	C	G	PASS	277101	0.267196	PASS	33948	0.124031	9.608e-05	0.0335489	FBgn0031413	CG9967	INTRON
2L_2347976_SNP	2347976	C	C	G	PASS	277101	0.267196	PASS	33948	0.124031	9.608e-05	0.0335489	FBgn0031414	eys	INTRON
2L_2349816_SNP	2349816	G	G	A	PASS	25072	0.223602	PASS	195129	0.398148	0.00011159	0.0353902	FBgn0031414	eys	INTRON
2L_2349816_SNP	2349816	G	G	A	PASS	25072	0.223602	PASS	195129	0.398148	0.00011159	0.0353902	FBgn0031413	CG9967	INTRON
2L_2351217_SNP	2351217	A	A	G	PASS	16799	0.37218	PASS	26366	0.200608	0.00016301	0.0411833	FBgn0031413	CG9967	INTRON
2L_2351217_SNP	2351217	A	A	G	PASS	16799	0.37218	PASS	26366	0.200608	0.00016301	0.0411833	FBgn0031414	eys	INTRON
2L_2351507_SNP	2351507	T	T	A	PASS	213103	0.325949	PASS	25737	0.12585	1.51415e-06	0.0067948	FBgn0031414	eys	INTRON
2L_2351507_SNP	2351507	T	T	A	PASS	213103	0.325949	PASS	25737	0.12585	1.51415e-06	0.0067948	FBgn0031413	CG9967	INTRON
2L_2353367_SNP	2353367	C	C	G	PASS	106109	0.506977	PASS	15564	0.292237	9.10435e-05	0.0327636	FBgn0031414	eys	SYNONYMOUS_CODING
2L_2353367_SNP	2353367	C	C	G	PASS	106109	0.506977	PASS	15564	0.292237	9.10435e-05	0.0327636	FBgn0031413	CG9967	INTRON
2L_2353530_SNP	2353530	C	C	T	PASS	125129	0.507874	PASS	19981	0.289286	1.80486e-05	0.0179714	FBgn0031414	eys	INTRON
2L_2353530_SNP	2353530	C	C	T	PASS	125129	0.507874	PASS	19981	0.289286	1.80486e-05	0.0179714	FBgn0031413	CG9967	INTRON
2L_2354319_SNP	2354319	T	C	T	PASS	101131	0.564655	PASS	17593	0.347015	4.18062e-05	0.0243814	FBgn0031413	CG9967	INTRON
2L_2354319_SNP	2354319	T	C	T	PASS	101131	0.564655	PASS	17593	0.347015	4.18062e-05	0.0243814	FBgn0031414	eys	SYNONYMOUS_CODING
2L_2356029_SNP	2356029	T	T	C	PASS	251134	0.348052	PASS	180225	0.555556	5.38198e-06	0.0111686	FBgn0031414	eys	INTRON
2L_2356029_SNP	2356029	T	T	C	PASS	251134	0.348052	PASS	180225	0.555556	5.38198e-06	0.0111686	FBgn0031413	CG9967	INTRON
2L_2356702_SNP	2356702	C	C	T	PASS	145135	0.482143	PASS	20982	0.281787	5.01187e-05	0.026407	FBgn0031413	CG9967	INTRON
2L_2356702_SNP	2356702	C	C	T	PASS	145135	0.482143	PASS	20982	0.281787	5.01187e-05	0.026407	FBgn0031414	eys	SYNONYMOUS_CODING
2L_2357306_SNP	2357306	T	T	C	PASS	23666	0.218543	PASS	205131	0.389881	0.00014656	0.0394729	FBgn0031414	eys	INTRON
2L_2357306_SNP	2357306	T	T	C	PASS	23666	0.218543	PASS	205131	0.389881	0.00014656	0.0394729	FBgn0031413	CG9967	UTR_5_PRIME
2L_2357362_SNP	2357362	G	G	A	PASS	25092	0.269006	PASS	208164	0.44086	0.00014624	0.039423	FBgn0031414	eys	INTRON
2L_2357362_SNP	2357362	G	G	A	PASS	25092	0.269006	PASS	208164	0.44086	0.00014624	0.039423	FBgn0031413	CG9967	UPSTREAM	6
2L_2357601_SNP	2357601	A	A	C	PASS	24991	0.267647	PASS	200159	0.442897	0.00011956	0.0364398	FBgn0031414	eys	INTRON
2L_2357601_SNP	2357601	A	A	C	PASS	24991	0.267647	PASS	200159	0.442897	0.00011956	0.0364398	FBgn0031413	CG9967	UPSTREAM	245
2L_2358573_SNP	2358573	C	C	T	PASS	37343	0.103365	PASS	332100	0.231481	0.00013124	0.0376776	FBgn0031414	eys	DOWNSTREAM	46
2L_2358573_SNP	2358573	C	C	T	PASS	37343	0.103365	PASS	332100	0.231481	0.00013124	0.0376776	FBgn0014010	Rab5	DOWNSTREAM	569
2L_2361943_SNP	2361943	A	A	T	PASS	268104	0.27957	PASS	31149	0.136111	0.00016387	0.0412768	FBgn0014010	Rab5	INTRON
2L_2361944_SNP	2361944	C	C	T	PASS	266104	0.281081	PASS	31745	0.124309	3.21777e-05	0.0221084	FBgn0014010	Rab5	INTRON
2L_2361960_SNP	2361960	A	A	G	PASS	258120	0.31746	PASS	31452	0.142076	7.93934e-06	0.0130043	FBgn0014010	Rab5	INTRON
2L_2362414_SNP	2362414	A	A	G	PASS	265102	0.277929	PASS	35946	0.11358	7.27406e-06	0.0126499	FBgn0014010	Rab5	INTRON
2L_2365855_SNP	2365855	G	G	T	PASS	187127	0.404459	PASS	24369	0.221154	6.08423e-05	0.0281889	FBgn0261647	Axud1	INTRON
2L_2365855_SNP	2365855	G	G	T	PASS	187127	0.404459	PASS	24369	0.221154	6.08423e-05	0.0281889	FBgn0014010	Rab5	UPSTREAM	582
2L_2365861_SNP	2365861	C	C	T	PASS	190123	0.392971	PASS	24069	0.223301	0.00020019	0.044722	FBgn0261647	Axud1	INTRON
2L_2365861_SNP	2365861	C	C	T	PASS	190123	0.392971	PASS	24069	0.223301	0.00020019	0.044722	FBgn0014010	Rab5	UPSTREAM	588
2L_2365865_SNP	2365865	C	C	T	PASS	180126	0.411765	PASS	23771	0.230519	9.1691e-05	0.0329246	FBgn0261647	Axud1	INTRON
2L_2365865_SNP	2365865	C	C	T	PASS	180126	0.411765	PASS	23771	0.230519	9.1691e-05	0.0329246	FBgn0014010	Rab5	UPSTREAM	592
2L_2377951_SNP	2377951	G	G	C	PASS	17756	0.240343	PASS	25126	0.0938628	0.00021202	0.0456366	FBgn0031420	Atxn7	SYNONYMOUS_CODING
2L_2377966_SNP	2377966	C	C	T	PASS	18761	0.245968	PASS	26527	0.0924657	8.10619e-05	0.0314495	FBgn0031420	Atxn7	SYNONYMOUS_CODING
2L_2384650_SNP	2384650	T	T	C	PASS	231130	0.360111	PASS	30671	0.188329	3.87112e-05	0.02366	FBgn0031422	CG9870	SYNONYMOUS_CODING
2L_2384650_SNP	2384650	T	T	C	PASS	231130	0.360111	PASS	30671	0.188329	3.87112e-05	0.02366	FBgn0031423	CG3557	DOWNSTREAM	111
2L_2390578_SNP	2390578	T	C	T	PASS	28999	0.255155	PASS	221174	0.440506	2.28069e-05	0.0195568	FBgn0264081	CG43750	NON_SYNONYMOUS_CODING
2L_2390582_SNP	2390582	A	T	A	PASS	28690	0.239362	PASS	216159	0.424	2.506e-05	0.0203448	FBgn0264081	CG43750	SYNONYMOUS_CODING
2L_2396104_SNP	2396104	C	C	A	PASS	24852	0.173333	PASS	212109	0.339564	0.00011862	0.0362976	FBgn0031424	VGlut	INTRON
2L_2397271_SNP	2397271	T	T	G	PASS	30062	0.171271	PASS	37323	0.0580808	0.00013026	0.0376323	FBgn0031424	VGlut	INTRON
2L_2397530_SNP	2397530	C	C	A	PASS	30539	0.113372	PASS	28193	0.248663	0.00019795	0.0445484	FBgn0031424	VGlut	INTRON
2L_2398396_SNP	2398396	G	G	A	PASS	27227	0.090301	PASS	23588	0.272446	1.74074e-06	0.00718259	FBgn0031424	VGlut	INTRON
2L_2398581_SNP	2398581	G	G	A	PASS	271100	0.269542	PASS	214172	0.445596	7.60482e-05	0.0306636	FBgn0031424	VGlut	INTRON
2L_2398624_SNP	2398624	G	G	A	PASS	26286	0.247126	PASS	200141	0.41349	0.00021561	0.0459291	FBgn0031424	VGlut	INTRON
2L_2405068_SNP	2405068	A	A	C	PASS	173131	0.430921	PASS	21267	0.240143	6.35556e-05	0.0286699	FBgn0031424	VGlut	INTRON
2L_2405072_SNP	2405072	T	T	G	PASS	170130	0.433333	PASS	21971	0.244828	7.51732e-05	0.0305671	FBgn0031424	VGlut	INTRON
2L_2405160_SNP	2405160	G	A	G	PASS	199144	0.419825	PASS	28498	0.256545	0.00024704	0.0483803	FBgn0031424	VGlut	INTRON
2L_2408723_SNP	2408723	T	T	C	PASS	234126	0.35	PASS	216235	0.521064	0.00015652	0.0404561	FBgn0031424	VGlut	UTR_3_PRIME
2L_2410074_SNP	2410074	A	A	T	AF	33317	0.0485714	PASS	31162	0.16622	5.477e-05	0.0272062	FBgn0031424	VGlut	UTR_3_PRIME
2L_2410074_SNP	2410074	A	A	T	AF	33317	0.0485714	PASS	31162	0.16622	5.477e-05	0.0272062	FBgn0031426	CG18641	DOWNSTREAM	55
2L_2419003_SNP	2419003	C	C	G	AF	29212	0.0394737	PASS	23746	0.162544	5.06653e-05	0.0264931	FBgn0085476	CG34447	SYNONYMOUS_CODING
2L_2419171_SNP	2419171	C	C	T	AF	32914	0.0408163	PASS	32653	0.139842	0.0002479	0.0484495	FBgn0085476	CG34447	SYNONYMOUS_CODING
2L_2420201_SNP	2420201	A	A	G	PASS	29846	0.133721	AF	34613	0.0362117	0.00023236	0.0472445	FBgn0085476	CG34447	UPSTREAM	188
2L_2420201_SNP	2420201	A	A	G	PASS	29846	0.133721	AF	34613	0.0362117	0.00023236	0.0472445	FBgn0031428	CG9886	UPSTREAM	629
2L_2420472_SNP	2420472	C	C	A	PASS	148202	0.577143	PASS	230154	0.401042	0.00017229	0.0421297	FBgn0031428	CG9886	UPSTREAM	358
2L_2420472_SNP	2420472	C	C	A	PASS	148202	0.577143	PASS	230154	0.401042	0.00017229	0.0421297	FBgn0085476	CG34447	UPSTREAM	459
2L_2421972_SNP	2421972	C	A	C	PASS	185112	0.377104	PASS	143194	0.575668	5.267e-05	0.0269002	FBgn0031428	CG9886	NON_SYNONYMOUS_CODING
2L_2426311_SNP	2426311	G	G	T	PASS	33325	0.0698324	PASS	27974	0.209632	2.04526e-05	0.0187348	FBgn0266217	CR44912	DOWNSTREAM	739
2L_2426318_SNP	2426318	A	A	G	PASS	34424	0.0652174	PASS	30077	0.204244	1.27332e-05	0.0157259	FBgn0266217	CR44912	DOWNSTREAM	732
2L_2441231_SNP	2441231	A	A	G	PASS	20293	0.315254	PASS	162169	0.510574	5.851e-05	0.0278133	FBgn0000490	dpp	INTRON
2L_2443595_SNP	2443595	G	G	A	AF	30513	0.0408805	PASS	26946	0.146032	0.00023599	0.0475242	FBgn0000490	dpp	INTRON
2L_2448725_SNP	2448725	G	G	T	PASS	30927	0.0803571	AF	3100	0	2.7836e-05	0.0213474	FBgn0000490	dpp	INTRON
2L_2460685_SNP	2460685	A	A	G	PASS	301100	0.249377	PASS	36140	0.0997506	1.55185e-05	0.0169703	FBgn0012017	tRNA:Y1:22Fb	UPSTREAM	641
2L_2460685_SNP	2460685	A	A	G	PASS	301100	0.249377	PASS	36140	0.0997506	1.55185e-05	0.0169703	FBgn0000490	dpp	DOWNSTREAM	862
2L_2460718_SNP	2460718	C	C	A	PASS	30571	0.18883	PASS	36829	0.0730479	0.00019904	0.0446813	FBgn0012017	tRNA:Y1:22Fb	UPSTREAM	674
2L_2460718_SNP	2460718	C	C	A	PASS	30571	0.18883	PASS	36829	0.0730479	0.00019904	0.0446813	FBgn0000490	dpp	DOWNSTREAM	895
2L_2460719_SNP	2460719	G	G	A	PASS	30971	0.186842	PASS	37128	0.0701754	0.00015204	0.0399945	FBgn0012017	tRNA:Y1:22Fb	UPSTREAM	675
2L_2460719_SNP	2460719	G	G	A	PASS	30971	0.186842	PASS	37128	0.0701754	0.00015204	0.0399945	FBgn0000490	dpp	DOWNSTREAM	896
2L_2460826_SNP	2460826	G	G	T	PASS	30376	0.200528	PASS	36226	0.0670103	2.21436e-05	0.0193109	FBgn0012017	tRNA:Y1:22Fb	UPSTREAM	782
2L_2466251_SNP	2466251	G	G	T	AF	26912	0.0427046	PASS	27152	0.160991	9.10429e-05	0.0327636	Intergenic	Intergenic
2L_2471106_SNP	2471106	A	A	G	PASS	310101	0.245742	PASS	232162	0.411168	0.00011101	0.0353132	FBgn0266824	CR45286	DOWNSTREAM	538
2L_2471341_SNP	2471341	C	C	T	PASS	33486	0.204762	PASS	252141	0.358779	0.00016503	0.0413797	FBgn0266824	CR45286	DOWNSTREAM	33
2L_2471348_SNP	2471348	G	G	A	AF	40419	0.0449173	PASS	33461	0.15443	5.57859e-05	0.0273186	FBgn0266824	CR45286	DOWNSTREAM	296
2L_2471351_SNP	2471351	A	A	T	PASS	33580	0.192771	PASS	252145	0.365239	2.331e-05	0.0198006	FBgn0266824	CR45286	DOWNSTREAM	293
2L_2495270_SNP	2495270	C	C	T	PASS	175175	0.5	PASS	264115	0.30343	1.979e-05	0.0186136	FBgn0011818	oaf	INTRON
2L_250164_SNP	250164	G	G	A	PASS	29487	0.228346	PASS	30832	0.0941176	0.00010918	0.0350912	FBgn0266557	kis	INTRON
2L_250164_SNP	250164	G	G	A	PASS	29487	0.228346	PASS	30832	0.0941176	0.00010918	0.0350912	FBgn0265149	CR44218	DOWNSTREAM	352
2L_250164_SNP	250164	G	G	A	PASS	29487	0.228346	PASS	30832	0.0941176	0.00010918	0.0350912	FBgn0022246	Rpp30	DOWNSTREAM	875
2L_2509293_SNP	2509293	T	T	A	PASS	23360	0.204778	PASS	184121	0.396721	2.91073e-05	0.0215171	Intergenic	Intergenic
2L_2509304_SNP	2509304	G	G	T	PASS	23162	0.211604	PASS	191122	0.389776	9.74059e-05	0.0337069	Intergenic	Intergenic
2L_2509488_SNP	2509488	G	T	G	PASS	180115	0.389831	PASS	27579	0.223164	0.00021594	0.0459701	Intergenic	Intergenic
2L_2510748_SNP	2510748	G	G	C	PASS	154138	0.472603	PASS	20685	0.292096	0.0002343	0.0474646	Intergenic	Intergenic
2L_2512769_SNP	2512769	T	T	A	PASS	186200	0.518135	PASS	266134	0.335	5.47477e-05	0.0272062	Intergenic	Intergenic
2L_2516684_SNP	2516684	T	C	T	PASS	26023	0.0812721	PASS	25470	0.216049	0.00014624	0.039423	FBgn0031430	CG3528	DOWNSTREAM	418
2L_2518260_SNP	2518260	T	T	C	PASS	28969	0.192737	PASS	231130	0.360111	7.25619e-05	0.030128	FBgn0031430	CG3528	UPSTREAM	223
2L_2519713_SNP	2519713	C	G	C	PASS	25874	0.222892	PASS	209140	0.401146	6.10257e-05	0.0282108	Intergenic	Intergenic
2L_2526335_SNP	2526335	C	C	T	PASS	164125	0.432526	PASS	21571	0.248252	0.0001262	0.0371614	Intergenic	Intergenic
2L_2540083_SNP	2540083	G	G	A	PASS	206142	0.408046	PASS	27686	0.237569	0.00011813	0.0362773	Intergenic	Intergenic
2L_2540496_SNP	2540496	A	A	T	PASS	31119	0.0575758	PASS	26857	0.175385	0.00015709	0.0405007	Intergenic	Intergenic
2L_2541347_SNP	2541347	C	C	T	PASS	251121	0.325269	PASS	31267	0.176781	0.0002333	0.0473592	Intergenic	Intergenic
2L_2542781_SNP	2542781	C	G	C	PASS	186115	0.38206	PASS	139184	0.569659	0.00014242	0.0389415	Intergenic	Intergenic
2L_2542785_SNP	2542785	T	T	A	PASS	23068	0.228188	PASS	30125	0.0766871	1.98e-05	0.0186136	Intergenic	Intergenic
2L_2545892_SNP	2545892	G	G	A	PASS	144196	0.576471	PASS	233146	0.385224	5.0258e-05	0.02642	Intergenic	Intergenic
2L_2546243_SNP	2546243	A	T	A	PASS	13155	0.295699	PASS	104117	0.529412	3.68e-05	0.0232888	Intergenic	Intergenic
2L_2547733_SNP	2547733	G	G	C	PASS	22180	0.265781	PASS	174141	0.447619	0.00012885	0.0374789	Intergenic	Intergenic
2L_2547734_SNP	2547734	C	C	A	PASS	21880	0.268456	PASS	172141	0.450479	0.00013586	0.0381923	Intergenic	Intergenic
2L_2548902_SNP	2548902	T	T	C	PASS	189134	0.414861	PASS	25378	0.23565	8.316e-05	0.0316936	Intergenic	Intergenic
2L_2548922_SNP	2548922	T	A	T	PASS	178142	0.44375	PASS	23778	0.247619	2.64825e-05	0.0208201	Intergenic	Intergenic
2L_2548950_SNP	2548950	C	C	T	PASS	30719	0.0582822	PASS	26556	0.174455	0.00020415	0.045074	Intergenic	Intergenic
2L_2548955_SNP	2548955	C	C	A	AF	30816	0.0493827	PASS	26359	0.18323	1.88785e-05	0.0182627	Intergenic	Intergenic
2L_2548974_SNP	2548974	G	G	T	PASS	29417	0.0546624	PASS	23954	0.1843	6.2156e-05	0.0284578	Intergenic	Intergenic
2L_2549776_SNP	2549776	G	G	A	PASS	30160	0.166205	PASS	262126	0.324742	7.69232e-05	0.0308392	Intergenic	Intergenic
2L_2553311_SNP	2553311	G	T	G	PASS	177169	0.488439	PASS	227101	0.307927	0.00012841	0.0374451	FBgn0031431	CG3515	UPSTREAM	486
2L_2555893_SNP	2555893	C	C	A	PASS	17156	0.246696	PASS	24326	0.0966543	0.00020128	0.0448086	FBgn0264944	CR44113	EXON
2L_2555941_SNP	2555941	G	G	C	PASS	18157	0.239496	PASS	25326	0.09319	0.00019464	0.0442528	FBgn0264944	CR44113	EXON
2L_2555948_SNP	2555948	A	A	G	PASS	14296	0.403361	PASS	21559	0.215328	0.0001198	0.0364744	FBgn0264944	CR44113	EXON
2L_2559284_SNP	2559284	C	C	A	PASS	249106	0.298592	PASS	33353	0.137306	2.934e-05	0.0215241	Intergenic	Intergenic
2L_2559288_SNP	2559288	A	A	G	PASS	243105	0.301724	PASS	33151	0.133508	1.42658e-05	0.016435	Intergenic	Intergenic
2L_2559908_SNP	2559908	G	G	A	PASS	23885	0.263158	PASS	35844	0.109453	2.90738e-05	0.0215171	Intergenic	Intergenic
2L_2563651_SNP	2563651	C	C	T	PASS	198107	0.35082	PASS	148190	0.56213	1.4481e-05	0.0164862	FBgn0031432	Cyp309a1	INTRON
2L_2563653_SNP	2563653	A	A	T	PASS	20498	0.324503	PASS	161174	0.519403	5.782e-05	0.0276948	FBgn0031432	Cyp309a1	INTRON
2L_2565350_SNP	2565350	C	C	T	PASS	22089	0.288026	PASS	25438	0.130137	0.00010285	0.0343392	FBgn0041337	Cyp309a2	SYNONYMOUS_CODING
2L_2565350_SNP	2565350	C	C	T	PASS	22089	0.288026	PASS	25438	0.130137	0.00010285	0.0343392	FBgn0031432	Cyp309a1	UPSTREAM	52
2L_256993_SNP	256993	G	G	A	PASS	233103	0.306548	PASS	26443	0.140065	4.36918e-05	0.0248362	FBgn0031238	CG3645	INTRON
2L_2596445_SNP	2596445	T	T	C	PASS	238149	0.385013	PASS	30683	0.213368	4.72769e-05	0.0258501	Intergenic	Intergenic
2L_2596452_SNP	2596452	T	T	A	PASS	238144	0.376963	PASS	33184	0.20241	2.57189e-05	0.0205652	Intergenic	Intergenic
2L_2609835_SNP	2609835	C	C	A	PASS	23454	0.1875	PASS	28919	0.0616883	0.00014495	0.03931	FBgn0031440	CG15395	UPSTREAM	159
2L_2617092_SNP	2617092	T	T	G	PASS	29360	0.169972	PASS	229122	0.347578	1.94548e-05	0.0184601	Intergenic	Intergenic
2L_2619901_SNP	2619901	C	C	T	PASS	30085	0.220779	PASS	36039	0.0977444	0.00025166	0.0487673	FBgn0263322	CG43403	UPSTREAM	286
2L_2622639_SNP	2622639	C	C	T	PASS	164192	0.539326	PASS	261123	0.320312	2.24e-06	0.007827	Intergenic	Intergenic
2L_2630631_SNP	2630631	C	C	G	PASS	19469	0.262357	PASS	141121	0.461832	7.31141e-05	0.0302225	Intergenic	Intergenic
2L_2631124_SNP	2631124	T	T	A	PASS	20150	0.199203	PASS	181115	0.388514	5.85945e-05	0.0278133	Intergenic	Intergenic
2L_264751_SNP	264751	A	G	A	PASS	20387	0.3	PASS	27644	0.1375	7.83751e-05	0.0310155	FBgn0031239	CG17075	SYNONYMOUS_CODING
2L_264751_SNP	264751	A	G	A	PASS	20387	0.3	PASS	27644	0.1375	7.83751e-05	0.0310155	FBgn0031238	CG3645	INTRON
2L_2650495_SNP	2650495	T	T	C	PASS	25294	0.271676	PASS	233196	0.456876	3.169e-05	0.0219806	FBgn0053125	CG33125	SYNONYMOUS_CODING
2L_2654405_SNP	2654405	C	C	T	PASS	25676	0.228916	PASS	29631	0.0948012	0.00017337	0.042226	FBgn0026395	Or23a	NON_SYNONYMOUS_CODING
2L_2654405_SNP	2654405	C	C	T	PASS	25676	0.228916	PASS	29631	0.0948012	0.00017337	0.042226	FBgn0031442	Prosbeta4R1	DOWNSTREAM	479
2L_2654405_SNP	2654405	C	C	T	PASS	25676	0.228916	PASS	29631	0.0948012	0.00017337	0.042226	FBgn0031443	Prosbeta4R2	UPSTREAM	989
2L_2669879_SNP	2669879	C	C	G	PASS	203165	0.44837	PASS	314106	0.252381	7.68442e-06	0.0128759	FBgn0041248	Gr23a	SYNONYMOUS_CODING
2L_2673261_SNP	2673261	A	A	T	PASS	158178	0.529762	PASS	241131	0.352151	0.00016244	0.0411296	Intergenic	Intergenic
2L_267388_SNP	267388	A	A	G	PASS	256135	0.345269	PASS	185203	0.523196	9.58278e-05	0.0335427	FBgn0031239	CG17075	UTR_5_PRIME
2L_267388_SNP	267388	A	A	G	PASS	256135	0.345269	PASS	185203	0.523196	9.58278e-05	0.0335427	FBgn0031238	CG3645	INTRON
2L_267391_SNP	267391	G	G	A	PASS	257132	0.339332	PASS	184199	0.519582	7.93968e-05	0.0312275	FBgn0031239	CG17075	UTR_5_PRIME
2L_267391_SNP	267391	G	G	A	PASS	257132	0.339332	PASS	184199	0.519582	7.93968e-05	0.0312275	FBgn0031238	CG3645	INTRON
2L_2674281_SNP	2674281	G	G	A	PASS	32619	0.0550725	PASS	28373	0.205056	2.74022e-06	0.00853878	Intergenic	Intergenic
2L_2674297_SNP	2674297	G	G	T	AF	35616	0.0430108	PASS	30754	0.149584	0.00011669	0.0361407	Intergenic	Intergenic
2L_2674612_SNP	2674612	G	G	A	PASS	250108	0.301676	PASS	29053	0.154519	0.00022591	0.0468155	Intergenic	Intergenic
2L_2676203_SNP	2676203	T	T	C	PASS	147130	0.469314	PASS	22086	0.281046	0.00011908	0.036364	Intergenic	Intergenic
2L_2679700_SNP	2679700	C	C	A	PASS	177115	0.393836	PASS	123174	0.585859	0.00013483	0.0380685	FBgn0051690	CG31690	INTRON
2L_2679706_SNP	2679706	A	A	C	PASS	118172	0.593103	PASS	182122	0.401316	0.00013224	0.0377809	FBgn0051690	CG31690	INTRON
2L_2683318_SNP	2683318	A	G	A	PASS	132175	0.570033	PASS	240102	0.298246	1.89151e-08	0.00144841	FBgn0051690	CG31690	INTRON
2L_268337_SNP	268337	T	T	C	PASS	185140	0.430769	PASS	297102	0.255639	9.3699e-05	0.0332267	FBgn0031238	CG3645	INTRON
2L_268337_SNP	268337	T	T	C	PASS	185140	0.430769	PASS	297102	0.255639	9.3699e-05	0.0332267	FBgn0031240	CG3345	UPSTREAM	751
2L_268337_SNP	268337	T	T	C	PASS	185140	0.430769	PASS	297102	0.255639	9.3699e-05	0.0332267	FBgn0031239	CG17075	UPSTREAM	832
[truncated: 8,391 more rows]

## Sheet: Male
S1 Table: Extreme QTL analysis for adult male resistance to lead exposure. Filter 1, Count 1 and Frequency 1 are filter, count and frequency of minor alleles from the resistant population, respectively. Filter 2, Count 2 and Frequency 2 are filter, count and frequency of minor alleles from the control population, respectively.
SNP ID	Chromosome Position	Reference Allele	Major Allele	Minor Allele	Filter 1	Count 1	Frequency 1	Filter Allele 2	Count Allele 2	Frequency Allele 2	P-value	FDR	Flybase ID	Gene Symbol	Site Class	Position (bp Upstream or Downstream)
2L_1319267_SNP	1319267	C	C	A	PASS	18895	0.335689	PASS	26844	0.141256	5.30493e-06	0.0376097	FBgn0032218	CG5381	INTRON
2L_1319274_SNP	1319274	T	T	G	PASS	19792	0.318339	PASS	26841	0.132687	9.17674e-06	0.0436317	FBgn0032218	CG5381	INTRON
2L_115517_SNP	115517	G	G	A	PASS	18612	0.354167	PASS	21139	0.156	1.22366e-05	0.0472394	FBgn0032362	spz4	INTRON
2L_115527_SNP	115527	G	G	A	PASS	18296	0.345324	PASS	21733	0.132	1.69513e-06	0.0268473	FBgn0032362	spz4	INTRON
2L_11557192_SNP	11557192	C	C	T	PASS	31545	0.125	PASS	24815	0.297454	7.91957e-06	0.0425678	Intergenic	Intergenic
2L_11557231_SNP	11557231	C	C	T	PASS	29945	0.138139	PASS	232113	0.327536	9.77817e-07	0.0238009	Intergenic	Intergenic
2L_11859573_SNP	11859573	A	T	A	PASS	178144	0.44725	PASS	27586	0.238227	4.46909e-06	0.035772	FBgn0264815	Pde1c	INTRON
2L_11861598_SNP	11861598	C	C	T	PASS	24575	0.234375	PASS	31227	0.796462	1.16127e-05	0.0469702	FBgn0264815	Pde1c	INTRON
2L_1198232_SNP	1198232	A	T	A	PASS	321	0.654256	PASS	29878	0.274468	1.454e-05	0.0492603	FBgn0032387	CG16965	SYNONYMOUS_CODING
2L_12169193_SNP	12169193	A	G	A	PASS	141113	0.444882	PASS	19652	0.296774	2.41737e-06	0.0290678	FBgn0051760	CG3176	NON_SYNONYMOUS_CODING
2L_12169198_SNP	12169198	C	C	T	PASS	14615	0.418327	PASS	1985	0.216129	1.09018e-05	0.0460706	FBgn0051760	CG3176	SYNONYMOUS_CODING
2L_12345798_SNP	12345798	A	A	G	PASS	3631	0.919881	PASS	26989	0.248634	1.24753e-05	0.0472394	FBgn0262475	bru-2	INTRON
2L_12387_SNP	12387	G	G	T	PASS	17719	0.381119	PASS	13161	0.698485	9.00804e-06	0.0436317	FBgn0262475	bru-2	INTRON
2L_12547139_SNP	12547139	T	T	C	PASS	237127	0.348911	PASS	3258	0.153439	1.40163e-06	0.0263103	FBgn0259176	bun	UPSTREAM	528
2L_12547145_SNP	12547145	A	A	G	PASS	228125	0.354177	PASS	31657	0.152815	8.66503e-07	0.0237686	FBgn0259176	bun	UPSTREAM	534
2L_1254715_SNP	1254715	C	C	T	PASS	22912	0.34384	PASS	31352	0.142466	6.86589e-07	0.0207258	FBgn0259176	bun	UPSTREAM	539
2L_12547152_SNP	12547152	G	G	A	PASS	23118	0.339846	PASS	31754	0.145553	1.69355e-06	0.0268473	FBgn0259176	bun	UPSTREAM	541
2L_12547157_SNP	12547157	G	G	A	PASS	229122	0.347578	PASS	3155	0.156849	1.43917e-06	0.0264785	FBgn0259176	bun	UPSTREAM	546
2L_1254719_SNP	1254719	T	T	C	PASS	248143	0.365729	PASS	3369	0.185484	1.32923e-05	0.0479757	FBgn0259176	bun	UPSTREAM	579
2L_12577394_SNP	12577394	C	C	A	PASS	24175	0.237342	PASS	21156	0.436975	1.1913e-05	0.0470661	Intergenic	Intergenic
2L_12676872_SNP	12676872	T	T	A	PASS	16162	0.278269	PASS	27324	0.8888	1.17336e-06	0.0258829	FBgn0004394	pdm2	INTRON
2L_12676897_SNP	12676897	G	G	T	PASS	1878	0.419355	PASS	19345	0.189756	1.058e-05	0.0454618	FBgn0004394	pdm2	INTRON
2L_12724713_SNP	12724713	A	A	G	PASS	26879	0.227666	PASS	32523	0.669195	1.68638e-06	0.0268473	FBgn0032456	MRP	INTRON
2L_13121664_SNP	13121664	G	C	G	PASS	16717	0.544514	PASS	22693	0.291536	7.53407e-06	0.0421062	FBgn0262352	CG435	DOWNSTREAM	897
2L_13792485_SNP	13792485	A	A	G	PASS	21178	0.269896	PASS	143134	0.483755	1.51349e-05	0.0497139	FBgn0028931	CG16863	NON_SYNONYMOUS_CODING
2L_13992685_SNP	13992685	G	T	G	PASS	26495	0.264624	PASS	3132	0.96961	4.44689e-06	0.035772	FBgn0003255	rk	INTRON
2L_15289857_SNP	15289857	T	T	C	AF	26613	0.46595	PASS	23678	0.248476	1.49345e-08	0.00375522	Intergenic	Intergenic
2L_153956_SNP	153956	T	T	A	PASS	21643	0.166232	PASS	198121	0.379313	2.44714e-06	0.0290704	Intergenic	Intergenic
2L_1684846_SNP	1684846	T	T	G	PASS	22248	0.177778	AF	3111	0.342679	3.72203e-06	0.0328735	Intergenic	Intergenic
2L_16381796_SNP	16381796	C	G	C	PASS	23562	0.287542	PASS	22148	0.421739	1.51063e-05	0.0497139	Intergenic	Intergenic
2L_16473179_SNP	16473179	G	G	T	PASS	118132	0.528	PASS	17371	0.299836	6.543e-06	0.0395197	FBgn0005677	dac	INTRON
2L_16562417_SNP	16562417	C	C	T	PASS	12123	0.546667	PASS	2294	0.317568	1.1944e-05	0.0470661	FBgn0259735	CG42389	INTRON
2L_1679899_SNP	1679899	C	G	C	PASS	24895	0.276968	PASS	183178	0.493748	2.91825e-06	0.0301555	FBgn0040261	Ugt36Bb	SYNONYMOUS_CODING
2L_1679899_SNP	1679899	C	G	C	PASS	24895	0.276968	PASS	183178	0.493748	2.91825e-06	0.0301555	FBgn0040260	Ugt36Bc	UPSTREAM	926
2L_16888367_SNP	16888367	T	A	T	PASS	19294	0.328671	PASS	132159	0.546392	1.481e-05	0.0493204	FBgn0261671	tweek	UPSTREAM	123
2L_16888367_SNP	16888367	T	A	T	PASS	19294	0.328671	PASS	132159	0.546392	1.481e-05	0.0493204	FBgn0265542	CR44392	UPSTREAM	14
2L_16888367_SNP	16888367	T	A	T	PASS	19294	0.328671	PASS	132159	0.546392	1.481e-05	0.0493204	FBgn0040985	CG6115	UPSTREAM	41
2L_17259_SNP	17259	G	G	T	PASS	16311	0.42934	PASS	21446	0.176924	1.72113e-06	0.0268473	Intergenic	Intergenic
2L_172515_SNP	172515	T	T	C	PASS	164115	0.412186	PASS	21748	0.181133	9.97957e-07	0.0238009	Intergenic	Intergenic
2L_1718522_SNP	1718522	A	A	C	PASS	14112	0.459771	PASS	296	0.223483	1.705e-06	0.0268473	Intergenic	Intergenic
2L_1724124_SNP	1724124	T	T	C	PASS	1395	0.479798	PASS	1754	0.241714	1.15152e-05	0.046921	FBgn0032629	beat-IIIc	INTRON
2L_18537385_SNP	18537385	A	A	G	PASS	112141	0.557312	PASS	18684	0.311111	2.15534e-06	0.0282757	FBgn0085370	Pde11	SYNONYMOUS_CODING
2L_18539228_SNP	18539228	C	C	T	PASS	1166	0.375	PASS	19835	0.152146	9.50315e-06	0.0441144	FBgn0085370	Pde11	INTRON
2L_18542883_SNP	18542883	C	C	T	PASS	19919	0.353896	PASS	25949	0.159991	6.79518e-06	0.039796	FBgn0085370	Pde11	INTRON
2L_1856723_SNP	1856723	G	T	G	PASS	25946	0.158197	PASS	21418	0.335437	1.27057e-05	0.0473302	FBgn0085370	Pde11	INTRON
2L_18658991_SNP	18658991	G	G	T	PASS	2585	0.293135	PASS	17172	0.52924	1.35483e-05	0.0483215	FBgn0032694	MESR3	INTRON
2L_18897119_SNP	18897119	C	C	A	PASS	211147	0.416145	PASS	28179	0.219444	1.29352e-05	0.0477381	FBgn0265950	CR44737	DOWNSTREAM	321
2L_189858_SNP	189858	T	T	G	PASS	1511	0.423769	PASS	23658	0.197279	2.07948e-06	0.0276477	Intergenic	Intergenic
2L_1916953_SNP	1916953	A	A	G	PASS	28897	0.251949	PASS	29174	0.454389	4.62361e-06	0.035772	FBgn0002023	Lim3	INTRON
2L_1916957_SNP	1916957	G	G	T	PASS	29199	0.253846	PASS	28168	0.446885	1.22846e-05	0.0472394	FBgn0002023	Lim3	INTRON
2L_19248317_SNP	19248317	T	T	C	PASS	133179	0.573718	PASS	2397	0.323333	4.04075e-07	0.0190506	Intergenic	Intergenic
2L_1933255_SNP	1933255	G	A	G	PASS	1717	0.5	PASS	24613	0.295129	1.1935e-05	0.0470661	Intergenic	Intergenic
2L_1996546_SNP	1996546	C	C	T	PASS	26482	0.236994	PASS	214163	0.432367	1.11018e-05	0.046396	FBgn0032836	CG168	UTR_3_PRIME
2L_1996546_SNP	1996546	C	C	T	PASS	26482	0.236994	PASS	214163	0.432367	1.11018e-05	0.046396	FBgn0042129	OS9	DOWNSTREAM	258
2L_22391_SNP	22391	A	A	G	PASS	23984	0.266192	PASS	162161	0.498452	4.79963e-07	0.0190555	Intergenic	Intergenic
2L_315838_SNP	315838	T	T	A	PASS	15524	0.568245	PASS	22114	0.341317	1.80689e-06	0.027033	FBgn0011648	Mad	INTRON
2L_327_SNP	327	T	T	A	PASS	187142	0.431619	PASS	26377	0.226476	6.07208e-06	0.039042	FBgn0085422	CG34393	INTRON
2L_3525655_SNP	3525655	G	C	G	PASS	13812	0.465116	PASS	2868	0.246377	1.13352e-05	0.0467245	FBgn0031548	CG8852	SYNONYMOUS_CODING
2L_3971851_SNP	3971851	A	A	T	PASS	27256	0.177317	PASS	228134	0.371657	2.66434e-06	0.0296647	FBgn0051774	fred	INTRON
2L_3971854_SNP	3971854	C	C	T	PASS	26654	0.16875	PASS	231137	0.372283	1.72614e-06	0.0268473	FBgn0051774	fred	INTRON
2L_425543_SNP	425543	T	G	T	PASS	31136	0.137464	PASS	24789	0.264889	1.45964e-05	0.0492603	FBgn0266832	CR45294	DOWNSTREAM	317
2L_425543_SNP	425543	T	G	T	PASS	31136	0.137464	PASS	24789	0.264889	1.45964e-05	0.0492603	FBgn0266833	CR45295	DOWNSTREAM	729
2L_4279337_SNP	4279337	T	T	C	PASS	3839	0.112392	PASS	2493	0.279279	1.18633e-05	0.0470661	FBgn0031592	Art2	START_GAINED
2L_4493488_SNP	4493488	A	G	A	PASS	14299	0.417884	PASS	22647	0.172161	6.56548e-07	0.0207258	FBgn0053196	dp	INTRON
2L_4797729_SNP	4797729	A	A	T	PASS	18398	0.348754	PASS	28649	0.146269	2.34718e-06	0.0290257	FBgn0031629	Clect27	INTRON
2L_4852711_SNP	4852711	G	G	A	PASS	25733	0.113793	PASS	22713	0.312121	1.00529e-06	0.0238009	FBgn0031640	Mon1	DOWNSTREAM	71
2L_4852711_SNP	4852711	G	G	A	PASS	25733	0.113793	PASS	22713	0.312121	1.00529e-06	0.0238009	FBgn0051660	pog	UPSTREAM	153
2L_4852745_SNP	4852745	C	C	T	PASS	24431	0.112727	PASS	21296	0.311688	1.4773e-06	0.0268262	FBgn0031640	Mon1	DOWNSTREAM	15
2L_4852745_SNP	4852745	C	C	T	PASS	24431	0.112727	PASS	21296	0.311688	1.4773e-06	0.0268262	FBgn0051660	pog	UPSTREAM	119
2L_4915923_SNP	4915923	T	A	T	PASS	193119	0.381413	PASS	2659	0.184953	9.27246e-06	0.0436317	FBgn0041150	hoe1	INTRON
2L_4915985_SNP	4915985	C	T	C	PASS	15118	0.442985	PASS	23668	0.223684	6.17272e-06	0.039042	FBgn0041150	hoe1	INTRON
2L_492384_SNP	492384	G	G	C	PASS	193121	0.385353	PASS	127194	0.643614	8.08033e-06	0.0426245	FBgn0041150	hoe1	INTRON
2L_498275_SNP	498275	A	G	A	PASS	28311	0.279898	PASS	24227	0.526682	2.75846e-08	0.00378329	FBgn0083962	CG34126	INTRON
2L_4982795_SNP	4982795	C	A	C	PASS	268115	0.32611	PASS	185195	0.513158	2.86753e-06	0.0301364	FBgn0083962	CG34126	INTRON
2L_4982845_SNP	4982845	C	T	C	PASS	242121	0.333333	PASS	169226	0.572152	2.36982e-07	0.0155447	FBgn0083962	CG34126	INTRON
2L_4982847_SNP	4982847	G	A	G	PASS	242118	0.327778	PASS	171226	0.56927	1.72415e-07	0.0136904	FBgn0083962	CG34126	INTRON
2L_4982873_SNP	4982873	T	C	T	PASS	234119	0.337115	PASS	186216	0.537313	1.434e-05	0.0490633	FBgn0083962	CG34126	INTRON
2L_4982924_SNP	4982924	G	T	G	PASS	22494	0.295597	PASS	186198	0.515625	2.57494e-06	0.0296647	FBgn0083962	CG34126	INTRON
2L_5111849_SNP	5111849	A	C	A	PASS	136134	0.496296	PASS	19876	0.277372	1.37189e-05	0.0486935	FBgn0261836	Msp3	INTRON
2L_5119187_SNP	5119187	T	A	T	PASS	15318	0.545454	PASS	23789	0.273614	1.95227e-08	0.00378329	FBgn0261836	Msp3	INTRON
2L_617418_SNP	617418	G	G	A	PASS	2291	0.339514	PASS	178195	0.522788	3.00629e-06	0.0305108	Intergenic	Intergenic
2L_622615_SNP	622615	G	G	T	PASS	147138	0.484215	PASS	2176	0.265734	9.06408e-06	0.0436317	FBgn0026755	Ugt37b1	SYNONYMOUS_CODING
2L_6242143_SNP	6242143	G	G	A	AF	2311	0.456431	PASS	18659	0.248163	2.20738e-07	0.0151374	Intergenic	Intergenic
2L_684861_SNP	684861	A	A	C	PASS	112165	0.595668	PASS	1581	0.356494	3.79735e-06	0.033308	FBgn0031861	CG17375	SYNONYMOUS_CODING
2L_684861_SNP	684861	A	A	C	PASS	112165	0.595668	PASS	1581	0.356494	3.79735e-06	0.033308	FBgn0031860	CG11236	DOWNSTREAM	489
2L_684879_SNP	684879	G	G	T	PASS	116165	0.587189	PASS	1448	0.357143	1.53133e-05	0.0498471	FBgn0031861	CG17375	SYNONYMOUS_CODING
2L_684879_SNP	684879	G	G	T	PASS	116165	0.587189	PASS	1448	0.357143	1.53133e-05	0.0498471	FBgn0031860	CG11236	DOWNSTREAM	57
2L_68571_SNP	68571	A	G	A	PASS	17615	0.373665	PASS	15159	0.622727	9.62229e-06	0.0443149	FBgn0031861	CG17375	SYNONYMOUS_CODING
2L_68571_SNP	68571	A	G	A	PASS	17615	0.373665	PASS	15159	0.622727	9.62229e-06	0.0443149	FBgn0031860	CG11236	DOWNSTREAM	699
2L_69239_SNP	69239	T	T	G	PASS	25567	0.287453	PASS	25145	0.414286	3.84491e-06	0.0335302	FBgn0028554	x16	UPSTREAM	99
2L_69239_SNP	69239	T	T	G	PASS	25567	0.287453	PASS	25145	0.414286	3.84491e-06	0.0335302	FBgn0004838	Hrb27C	UPSTREAM	395
2L_6924614_SNP	6924614	A	A	G	PASS	26352	0.165794	PASS	213115	0.356976	1.435e-05	0.0490633	FBgn0004838	Hrb27C	INTRON
2L_7298755_SNP	7298755	T	T	G	PASS	3519	0.58642	PASS	21557	0.295588	1.04487e-05	0.045289	Intergenic	Intergenic
2L_758562_SNP	758562	G	G	C	PASS	12858	0.311828	PASS	86114	0.57	8.95479e-06	0.0436317	Intergenic	Intergenic
2L_768395_SNP	768395	C	C	T	PASS	2818	0.341772	PASS	153188	0.55132	1.4214e-05	0.0490633	FBgn0040299	Myo28B1	SYNONYMOUS_CODING
2L_88919_SNP	88919	G	G	T	PASS	3222	0.679123	PASS	26478	0.228718	3.06477e-06	0.0305108	FBgn0031974	CG1256	INTRON
2L_88919_SNP	88919	G	G	T	PASS	3222	0.679123	PASS	26478	0.228718	3.06477e-06	0.0305108	FBgn0054010	CG341	DOWNSTREAM	684
2L_87436_SNP	87436	C	T	C	PASS	16119	0.541315	PASS	266125	0.319694	1.68791e-06	0.0268473	FBgn0003209	raw	INTRON
2L_8863836_SNP	8863836	C	C	A	PASS	127136	0.517113	PASS	23896	0.287425	3.25577e-06	0.0312123	FBgn0266798	CR4526	EXON
2L_8863836_SNP	8863836	C	C	A	PASS	127136	0.517113	PASS	23896	0.287425	3.25577e-06	0.0312123	FBgn0052987	CG32987	UTR_5_PRIME
2L_8863836_SNP	8863836	C	C	A	PASS	127136	0.517113	PASS	23896	0.287425	3.25577e-06	0.0312123	FBgn0052986	CG32986	DOWNSTREAM	93
2L_8891454_SNP	8891454	A	A	T	PASS	179195	0.521394	PASS	29112	0.291978	3.70092e-07	0.0190506	FBgn0261630	CG42713	UTR_5_PRIME
2L_8891458_SNP	8891458	T	C	T	PASS	16423	0.553134	PASS	263123	0.318653	3.68367e-07	0.0190506	FBgn0261630	CG42713	UTR_5_PRIME
2L_8891645_SNP	8891645	T	A	T	PASS	16517	0.574627	PASS	25819	0.297272	6.37973e-06	0.0391258	FBgn0261630	CG42713	INTRON
2L_935964_SNP	935964	G	C	G	PASS	24632	0.115179	PASS	18785	0.3125	2.94261e-06	0.0302004	Intergenic	Intergenic
2L_9855469_SNP	9855469	A	A	C	PASS	15955	0.257935	PASS	1315	0.548769	6.54874e-06	0.0395197	FBgn0032151	nAChRalpha6	INTRON
2L_9855499_SNP	9855499	A	A	T	PASS	18871	0.274131	PASS	131142	0.521465	1.39823e-06	0.0263103	FBgn0032151	nAChRalpha6	INTRON
2R_116226_SNP	116226	G	A	G	PASS	194123	0.388126	PASS	117187	0.615132	4.35198e-06	0.035772	FBgn0261269	conv	SYNONYMOUS_CODING
2R_1793253_SNP	1793253	C	C	T	PASS	17379	0.313493	PASS	2273	0.116732	6.00477e-06	0.039042	FBgn0027596	CG1249	SYNONYMOUS_CODING
2R_188985_SNP	188985	T	T	C	PASS	22927	0.154688	AF	299		4.49979e-06	0.035772	Intergenic	Intergenic
2R_116226_SNP	116226	C	C	T	PASS	29225	0.788644	PASS	2648	0.232558	1.224e-05	0.0472394	FBgn0033015	d4	INTRON
2R_141928_SNP	141928	T	T	G	PASS	2497	0.322259	PASS	27645	0.141869	1.24934e-05	0.0472394	FBgn0001222	Hsf	INTRON
2R_1558236_SNP	1558236	C	C	T	PASS	39641	0.938215	PASS	32211	0.238777	1.32317e-05	0.0479757	FBgn0033031	CG8245	DOWNSTREAM	745
2R_1679129_SNP	1679129	G	G	C	PASS	2859	0.229738	AF	3611	0.34732	3.49485e-08	0.0042881	Intergenic	Intergenic
2R_17727216_SNP	17727216	C	A	C	PASS	153165	0.518868	PASS	21192	0.336336	9.71069e-06	0.0443948	FBgn0034665	CG4372	UPSTREAM	913
2R_17919973_SNP	17919973	G	G	T	PASS	22612	0.346828	PASS	32263	0.163636	7.69187e-06	0.0424426	FBgn0085399	CG3437	INTRON
2R_1893315_SNP	1893315	C	C	T	PASS	22291	0.297348	PASS	2934	0.121212	1.52119e-05	0.0497139	FBgn0003900	twi	INTRON
2R_18939242_SNP	18939242	A	T	A	PASS	99163	0.622137	PASS	191123	0.39172	5.80087e-06	0.0388962	Intergenic	Intergenic
2R_192252_SNP	192252	G	G	A	PASS	114137	0.545817	PASS	19586	0.364982	3.32842e-06	0.0313845	Intergenic	Intergenic
2R_19119543_SNP	19119543	A	C	A	PASS	8653	0.381295	PASS	12218	0.128571	1.28727e-05	0.0477381	FBgn0034835	CG392	UPSTREAM	66
2R_19124875_SNP	19124875	G	A	G	PASS	198113	0.363345	PASS	29762	0.172719	8.39097e-06	0.0432966	Intergenic	Intergenic
2R_19127176_SNP	19127176	T	T	G	PASS	216	0.222222	PASS	3119	0.59375	3.40825e-06	0.0315457	Intergenic	Intergenic
2R_1922842_SNP	1922842	A	C	A	PASS	21477	0.264648	PASS	313	0.882353	2.66177e-06	0.0296647	Intergenic	Intergenic
2R_19297375_SNP	19297375	T	A	T	PASS	139137	0.496377	PASS	275	0.272727	7.94321e-06	0.0425678	Intergenic	Intergenic
2R_1934629_SNP	1934629	A	T	A	PASS	3554	0.154178	AF	3441	0.282486	5.9221e-06	0.039042	FBgn0264339	CG43795	INTRON
2R_1934652_SNP	1934652	T	G	T	PASS	3158	0.157687	AF	34113	0.367232	1.47584e-05	0.0492603	FBgn0264339	CG43795	INTRON
2R_1938652_SNP	1938652	A	A	G	PASS	18389	0.327259	PASS	25334	0.118467	9.75843e-07	0.0238009	Intergenic	Intergenic
2R_1938661_SNP	1938661	G	G	A	PASS	2764	0.236162	PASS	26516	0.569395	8.37831e-07	0.0234077	Intergenic	Intergenic
2R_1945674_SNP	1945674	C	C	T	PASS	186	0.25	PASS	24516	0.613268	1.00966e-06	0.0238009	FBgn0015277	Pi3K59F	SYNONYMOUS_CODING
2R_1945674_SNP	1945674	C	C	T	PASS	186	0.25	PASS	24516	0.613268	1.00966e-06	0.0238009	FBgn0050184	CG3184	UPSTREAM	822
2R_1945549_SNP	1945549	C	C	T	PASS	2959	0.169544	AF	3312	0.389524	9.02866e-06	0.0436317	FBgn0015903	apt	INTRON
2R_194783_SNP	194783	A	G	A	PASS	16129	0.446367	PASS	2367	0.228758	4.4816e-06	0.035772	FBgn0015903	apt	INTRON
2R_1948859_SNP	1948859	T	T	C	PASS	1458	0.355556	PASS	19834	0.146552	1.16543e-05	0.0470123	FBgn0260455	CG1332	UTR_3_PRIME
2R_1948859_SNP	1948859	T	T	C	PASS	1458	0.355556	PASS	19834	0.146552	1.16543e-05	0.0470123	FBgn0067903	IM18	NON_SYNONYMOUS_CODING
2R_1948859_SNP	1948859	T	T	C	PASS	1458	0.355556	PASS	19834	0.146552	1.16543e-05	0.0470123	FBgn0260762	CG4256	UPSTREAM	199
2R_1948859_SNP	1948859	T	T	C	PASS	1458	0.355556	PASS	19834	0.146552	1.16543e-05	0.0470123	FBgn0260761	CG42559	UPSTREAM	199
2R_1948859_SNP	1948859	T	T	C	PASS	1458	0.355556	PASS	19834	0.146552	1.16543e-05	0.0470123	FBgn0262845	CG4329	DOWNSTREAM	995
2R_1951687_SNP	1951687	T	T	C	PASS	15514	0.415444	PASS	21852	0.192593	1.186e-05	0.0470661	Intergenic	Intergenic
2R_19517_SNP	19517	A	A	G	PASS	1795	0.358496	PASS	22142	0.159696	1.39855e-05	0.0487628	Intergenic	Intergenic
2R_1951764_SNP	1951764	C	C	G	PASS	1877	0.272374	PASS	22422	0.894389	7.71657e-06	0.0424426	Intergenic	Intergenic
2R_1994386_SNP	1994386	T	T	C	PASS	16828	0.142857	AF	189		2.19523e-06	0.0285384	FBgn0034956	CG4324	INTRON
2R_1994386_SNP	1994386	T	T	C	PASS	16828	0.142857	AF	189		2.19523e-06	0.0285384	FBgn0034957	CG3121	UPSTREAM	558
2R_296276_SNP	296276	A	A	G	PASS	14112	0.444444	PASS	2236	0.212141	1.98173e-06	0.0276477	FBgn0034990	CG1146	UPSTREAM	55
2R_21178_SNP	21178	G	G	C	PASS	157145	0.481324	PASS	24291	0.273273	1.38462e-05	0.0486935	FBgn0000546	EcR	INTRON
2R_218925_SNP	218925	G	A	G	PASS	196114	0.367742	PASS	26656	0.173913	9.13395e-06	0.0436317	Intergenic	Intergenic
2R_218927_SNP	218927	G	A	G	PASS	192117	0.378648	PASS	2676	0.183486	9.66383e-06	0.0443149	Intergenic	Intergenic
2R_2286435_SNP	2286435	G	G	A	PASS	15741	0.27771	PASS	11515	0.477273	5.48059e-07	0.0196868	FBgn0035001	slik	NON_SYNONYMOUS_CODING
2R_2484925_SNP	2484925	T	T	G	PASS	29161	0.173295	PASS	216122	0.369468	9.0835e-06	0.0436317	FBgn0086655	jing	INTRON
2R_248493_SNP	248493	T	T	G	PASS	27862	0.182353	PASS	22113	0.373737	1.07421e-05	0.0457808	FBgn0086655	jing	INTRON
2R_2797265_SNP	2797265	A	A	T	PASS	21316	0.69869	PASS	2269	0.254613	2.66202e-06	0.0296647	FBgn0050158	CG3158	INTRON
2R_2797266_SNP	2797266	C	C	A	PASS	2112	0.54545	PASS	19766	0.259557	3.84748e-07	0.0190506	FBgn0050158	CG3158	INTRON
2R_282519_SNP	282519	C	T	C	PASS	24711	0.292299	PASS	162166	0.569756	4.56882e-06	0.035772	FBgn0050158	CG3158	INTRON
2R_3591343_SNP	3591343	T	C	T	PASS	24135	0.398239	PASS	2975	0.254794	9.85695e-06	0.0446575	FBgn0085245	CG34216	UTR_3_PRIME
2R_3591343_SNP	3591343	T	C	T	PASS	24135	0.398239	PASS	2975	0.254794	9.85695e-06	0.0446575	FBgn0050493	CG3493	DOWNSTREAM	337
2R_3744743_SNP	3744743	G	A	G	PASS	18256	0.235294	PASS	146122	0.455224	1.3127e-05	0.0479757	FBgn0085390	Dgk	INTRON
2R_5432385_SNP	5432385	T	T	G	PASS	31527	0.789474	PASS	26981	0.231429	1.02871e-05	0.0452475	FBgn0033421	CG1888	DOWNSTREAM	292
2R_6427672_SNP	6427672	G	G	C	PASS	29931	0.939394	PASS	23893	0.289668	7.54516e-07	0.02232	FBgn0005630	lola	INTRON
2R_644126_SNP	644126	A	A	T	PASS	28483	0.226158	PASS	4213	0.665188	6.86887e-07	0.0207258	Intergenic	Intergenic
2R_6441266_SNP	6441266	A	A	C	PASS	27489	0.24518	PASS	39742	0.95672	1.379e-05	0.0486935	Intergenic	Intergenic
2R_667972_SNP	667972	T	T	G	PASS	26129	0.385746	PASS	28352	0.155224	8.02072e-08	0.00864334	FBgn0024836	stan	UTR_3_PRIME
2R_667972_SNP	667972	T	T	G	PASS	26129	0.385746	PASS	28352	0.155224	8.02072e-08	0.00864334	FBgn0005586	Rab3	DOWNSTREAM	868
2R_674636_SNP	674636	T	C	T	PASS	22673	0.244147	PASS	168145	0.463259	3.98352e-06	0.0339539	FBgn0050015	CG315	INTRON
2R_674636_SNP	674636	T	C	T	PASS	22673	0.244147	PASS	168145	0.463259	3.98352e-06	0.0339539	FBgn0265348	CR4432	UPSTREAM	894
2R_6746316_SNP	6746316	T	A	T	PASS	24373	0.231127	PASS	173138	0.44373	4.99775e-06	0.0373356	FBgn0050015	CG315	INTRON
2R_6746316_SNP	6746316	T	A	T	PASS	24373	0.231127	PASS	173138	0.44373	4.99775e-06	0.0373356	FBgn0265348	CR4432	UPSTREAM	884
2R_7996427_SNP	7996427	C	T	C	PASS	19698	0.333333	PASS	1662	0.546449	1.021e-05	0.0452028	FBgn0086677	jeb	INTRON
2R_8356226_SNP	8356226	C	C	G	PASS	236	0.268966	AF	26612	0.431655	1.17934e-06	0.0258829	FBgn0033740	dgt5	INTRON
2R_8356226_SNP	8356226	C	C	G	PASS	236	0.268966	AF	26612	0.431655	1.17934e-06	0.0258829	FBgn0033741	CG8545	UTR_5_PRIME
2R_855818_SNP	855818	A	A	G	PASS	25286	0.254438	PASS	182153	0.456716	1.14784e-05	0.046921	FBgn0261625	CG4278	DOWNSTREAM	3
2R_855818_SNP	855818	A	A	G	PASS	25286	0.254438	PASS	182153	0.456716	1.14784e-05	0.046921	FBgn0261673	nemy	UPSTREAM	384
2R_8561172_SNP	8561172	A	A	T	PASS	1649	0.354337	PASS	21529	0.118852	2.02993e-07	0.0145834	FBgn0261625	CG4278	INTRON
2R_8575584_SNP	8575584	G	G	A	PASS	2271	0.243986	PASS	25622	0.791367	1.08724e-05	0.0460706	FBgn0033767	CG13148	SYNONYMOUS_CODING
2R_8575584_SNP	8575584	G	G	A	PASS	2271	0.243986	PASS	25622	0.791367	1.08724e-05	0.0460706	FBgn0050053	CG353	DOWNSTREAM	654
2R_9784754_SNP	9784754	A	A	G	PASS	13612	0.46875	PASS	21371	0.25	1.108e-05	0.046396	FBgn0013733	shot	INTRON
3L_122424_SNP	122424	T	T	C	PASS	19549	0.281967	AF	29814	0.448718	4.09829e-06	0.0345418	Intergenic	Intergenic
3L_1162786_SNP	1162786	T	T	C	PASS	372	0.611628	PASS	28278	0.216667	2.65976e-06	0.0296647	FBgn0036184	PCID2	UTR_3_PRIME
3L_1162786_SNP	1162786	T	T	C	PASS	372	0.611628	PASS	28278	0.216667	2.65976e-06	0.0296647	FBgn0042138	CG18815	UPSTREAM	351
3L_11969475_SNP	11969475	C	C	T	PASS	94154	0.629677	PASS	177115	0.393836	1.222e-05	0.0472394	FBgn0264488	CG43896	SYNONYMOUS_CODING
3L_11969475_SNP	11969475	C	C	T	PASS	94154	0.629677	PASS	177115	0.393836	1.222e-05	0.0472394	FBgn0036232	CG14125	DOWNSTREAM	565
3L_1224889_SNP	1224889	G	G	T	PASS	113163	0.595797	PASS	18895	0.335689	6.01017e-07	0.0207258	FBgn0041096	rols	INTRON
3L_1224889_SNP	1224889	G	G	T	PASS	113163	0.595797	PASS	18895	0.335689	6.01017e-07	0.0207258	FBgn0264725	CG43993	UPSTREAM	768
3L_1239275_SNP	1239275	T	T	C	PASS	199116	0.368254	PASS	143224	0.613542	4.64714e-07	0.0190555	FBgn0041096	rols	INTRON
3L_1239275_SNP	1239275	T	T	C	PASS	199116	0.368254	PASS	143224	0.613542	4.64714e-07	0.0190555	FBgn0263647	CG43638	DOWNSTREAM	819
3L_12158869_SNP	12158869	A	A	G	PASS	28827	0.857143	PASS	279	0.25	5.07498e-06	0.0375027	FBgn0036260	Rh7	UTR_3_PRIME
3L_1231335_SNP	1231335	A	A	C	PASS	19218	0.36	PASS	24146	0.162788	6.22858e-06	0.039042	Intergenic	Intergenic
3L_12357879_SNP	12357879	C	C	T	PASS	24892	0.275882	PASS	31634	0.971429	2.79262e-06	0.0301364	Intergenic	Intergenic
3L_12451773_SNP	12451773	C	T	C	PASS	25572	0.221835	PASS	32926	0.732394	1.505e-05	0.0497139	Intergenic	Intergenic
3L_1281368_SNP	1281368	C	C	T	PASS	3293	0.835655	AF	381		7.95636e-06	0.0425678	FBgn0260965	CG42588	SYNONYMOUS_CODING
3L_12944161_SNP	12944161	A	G	A	PASS	19268	0.261538	PASS	152151	0.49835	1.87956e-06	0.027033	Intergenic	Intergenic
3L_1368913_SNP	1368913	T	C	T	PASS	188165	0.467422	PASS	28299	0.259843	4.17669e-06	0.0350071	FBgn0003138	Ptp61F	INTRON
3L_13989292_SNP	13989292	C	T	C	AF	29411	0.366557	PASS	23248	0.171429	1.08775e-05	0.0460706	FBgn0250848	26-29-p	SYNONYMOUS_CODING
3L_13989292_SNP	13989292	C	T	C	AF	29411	0.366557	PASS	23248	0.171429	1.08775e-05	0.0460706	FBgn0036395	CG17361	UPSTREAM	999
3L_13989928_SNP	13989928	T	G	T	AF	3611	0.34732	PASS	29956	0.157746	1.52137e-05	0.0497139	FBgn0250848	26-29-p	DOWNSTREAM	257
3L_13989928_SNP	13989928	T	G	T	AF	3611	0.34732	PASS	29956	0.157746	1.52137e-05	0.0497139	FBgn0036395	CG17361	UPSTREAM	363
3L_14377715_SNP	14377715	C	C	T	PASS	238128	0.349727	PASS	16725	0.551753	1.52238e-05	0.0497139	Intergenic	Intergenic
3L_14421399_SNP	14421399	A	T	A	PASS	18217	0.372422	PASS	127185	0.592949	8.29414e-06	0.0432481	FBgn0087007	bbg	INTRON
3L_14679873_SNP	14679873	T	T	C	PASS	33763	0.1575	PASS	225122	0.351585	1.81791e-06	0.027033	FBgn0259175	ome	INTRON
3L_14679873_SNP	14679873	T	T	C	PASS	33763	0.1575	PASS	225122	0.351585	1.81791e-06	0.027033	FBgn0036437	CG548	DOWNSTREAM	931
3L_1573689_SNP	1573689	A	T	A	PASS	118178	0.613514	PASS	25114	0.292958	2.0954e-10	0.00017128	FBgn0086690	cp39	INTRON
3L_15271425_SNP	15271425	T	T	A	PASS	132158	0.544828	PASS	2611	0.328992	1.405e-05	0.0487628	Intergenic	Intergenic
3L_1558477_SNP	1558477	A	A	G	PASS	28868	0.191112	PASS	264157	0.372922	1.18387e-05	0.0470661	Intergenic	Intergenic
3L_165328_SNP	165328	G	A	G	PASS	29178	0.211382	PASS	36527	0.688775	9.49666e-06	0.0441144	FBgn0263131	CG43373	INTRON
3L_1713544_SNP	1713544	C	C	T	PASS	22966	0.223729	PASS	175135	0.435484	6.29319e-06	0.039042	FBgn0260943	Rbp6	INTRON
3L_17576643_SNP	17576643	C	C	T	PASS	26289	0.253561	PASS	26168	0.449198	1.33333e-05	0.0480087	FBgn0000567	Eip74EF	INTRON
3L_18345912_SNP	18345912	A	G	A	PASS	25295	0.273775	PASS	183168	0.478632	8.92301e-06	0.0436317	Intergenic	Intergenic
3L_18984752_SNP	18984752	A	G	A	PASS	22448	0.176476	PASS	16817	0.389991	4.74638e-06	0.0365344	FBgn0036837	CG18135	SYNONYMOUS_CODING
3L_1959615_SNP	1959615	A	A	G	PASS	18459	0.242798	PASS	135121	0.472656	6.78832e-06	0.039796	FBgn0036890	CG9368	SYNONYMOUS_CODING
3L_22438543_SNP	22438543	C	C	T	PASS	17312	0.37999	PASS	12181	0.613289	5.51146e-06	0.0377955	Intergenic	Intergenic
3L_22643572_SNP	22643572	T	T	A	PASS	25874	0.222892	PASS	214163	0.432367	2.53931e-06	0.0296647	FBgn0053771	CG33771	DOWNSTREAM	484
3L_22693638_SNP	22693638	A	A	G	PASS	21919	0.332318	PASS	152194	0.566936	1.83527e-06	0.027033	FBgn0266591	CG45116	DOWNSTREAM	668
3L_22843617_SNP	22843617	C	C	T	PASS	3474	0.133592	PASS	25891	0.26745	1.3488e-05	0.0483215	FBgn0263345	CR43426	INTRON
3L_22843656_SNP	22843656	G	G	T	PASS	35437	0.946292	PASS	2629	0.255682	5.77715e-06	0.0388962	FBgn0263345	CR43426	INTRON
3L_262566_SNP	262566	G	A	G	PASS	18116	0.517857	PASS	19272	0.272727	3.19172e-06	0.0308671	FBgn0011828	Pxn	INTRON
3L_26294_SNP	26294	T	T	A	PASS	21271	0.258834	PASS	26825	0.853242	1.26238e-05	0.0472752	FBgn0011828	Pxn	INTRON
3L_2799844_SNP	2799844	G	G	C	PASS	25541	0.138514	PASS	21618	0.333333	3.55875e-06	0.0322464	FBgn0263392	CG43444	INTRON
3L_2875751_SNP	2875751	A	A	T	PASS	16386	0.345382	PASS	13518	0.571429	9.7664e-06	0.0445146	FBgn0263392	CG43444	INTRON
3L_2875762_SNP	2875762	C	C	G	PASS	17285	0.337393	PASS	127163	0.56269	6.65688e-06	0.039796	FBgn0263392	CG43444	INTRON
3L_2875766_SNP	2875766	C	C	T	PASS	17484	0.325581	PASS	126153	0.548387	1.53463e-05	0.0498471	FBgn0263392	CG43444	INTRON
3L_2936536_SNP	2936536	G	G	A	PASS	2482	0.254658	PASS	35237	0.951157	9.65562e-06	0.0443149	FBgn0262593	Shab	INTRON
3L_3252349_SNP	3252349	C	A	C	PASS	2499	0.292354	PASS	188184	0.494624	1.19471e-05	0.0470661	FBgn0263617	CR43626	EXON
3L_3294446_SNP	3294446	G	G	A	PASS	27557	0.171687	AF	28712	0.413378	1.406e-05	0.0487628	FBgn0035430	CG129	INTRON
3L_331157_SNP	331157	G	G	A	PASS	23157	0.436111	PASS	28861	0.174785	2.11939e-09	0.00106582	FBgn0035432	ZnT63C	INTRON
3L_3323544_SNP	3323544	G	G	A	PASS	15136	0.475524	PASS	23284	0.265823	1.4055e-05	0.0487628	FBgn0035437	CG11526	SYNONYMOUS_CODING
3L_3323583_SNP	3323583	C	C	T	PASS	15513	0.456143	PASS	21771	0.246528	1.53637e-05	0.0498471	FBgn0035437	CG11526	SYNONYMOUS_CODING
3L_3754454_SNP	3754454	A	A	T	PASS	27213	0.274667	PASS	22124	0.48	3.56945e-06	0.0322464	FBgn0035458	ppk27	SYNONYMOUS_CODING
3L_3754454_SNP	3754454	A	A	T	PASS	27213	0.274667	PASS	22124	0.48	3.56945e-06	0.0322464	FBgn0052264	CG32264	INTRON
3L_3795334_SNP	3795334	C	T	C	PASS	19219	0.497382	PASS	26887	0.245742	2.44356e-08	0.00378329	FBgn0052264	CG32264	INTRON
3L_3795539_SNP	3795539	A	A	T	PASS	146154	0.513333	PASS	23994	0.282282	1.5817e-06	0.0268473	FBgn0052264	CG32264	INTRON
3L_3795555_SNP	3795555	G	G	T	PASS	189138	0.422183	PASS	26571	0.211395	2.86791e-06	0.0301364	FBgn0052264	CG32264	INTRON
3L_3795558_SNP	3795558	G	G	C	PASS	18114	0.436138	PASS	26273	0.217915	1.67311e-06	0.0268473	FBgn0052264	CG32264	INTRON
3L_3818526_SNP	3818526	C	C	T	PASS	25713	0.286111	PASS	186182	0.494565	5.42081e-06	0.037693	FBgn0004888	Scsalpha	DOWNSTREAM	143
3L_3818526_SNP	3818526	C	C	T	PASS	25713	0.286111	PASS	186182	0.494565	5.42081e-06	0.037693	FBgn0004875	enc	UPSTREAM	153
3L_3835449_SNP	3835449	C	C	A	AF	36113	0.347594	PASS	3316	0.153453	1.12e-05	0.0465031	FBgn0004875	enc	INTRON
3L_4342417_SNP	4342417	G	A	G	PASS	136174	0.561293	PASS	2919	0.342767	8.30277e-06	0.0432481	FBgn0035533	Cip4	INTRON
3L_453285_SNP	453285	A	A	G	PASS	221132	0.373938	PASS	28362	0.179711	5.12962e-06	0.0375027	FBgn0035557	CG11353	UPSTREAM	32
3L_453285_SNP	453285	A	A	G	PASS	221132	0.373938	PASS	28362	0.179711	5.12962e-06	0.0375027	FBgn0014073	Tie	UPSTREAM	75
3L_4618457_SNP	4618457	C	T	C	PASS	213121	0.362275	PASS	28561	0.176358	1.26067e-05	0.0472752	FBgn0262733	Src64B	INTRON
3L_4686295_SNP	4686295	A	G	A	PASS	238118	0.331467	PASS	17622	0.534392	1.24825e-05	0.0472394	FBgn0262870	axo	INTRON
3L_472551_SNP	472551	C	C	T	PASS	17712	0.365591	PASS	25352	0.174918	1.28843e-05	0.0477381	FBgn0035574	RhoGEF64C	INTRON
3L_472595_SNP	472595	T	A	T	PASS	2918	0.346941	PASS	17127	0.54762	1.31467e-05	0.0479757	FBgn0035574	RhoGEF64C	INTRON
3L_4738164_SNP	4738164	C	C	A	PASS	191126	0.397476	PASS	29865	0.179634	5.28741e-07	0.0194561	FBgn0035574	RhoGEF64C	INTRON
3L_4916416_SNP	4916416	C	T	C	PASS	19992	0.316151	PASS	123155	0.557554	1.75182e-06	0.0269687	FBgn0028699	Rh5	INTRON
3L_53169_SNP	53169	G	G	A	PASS	23269	0.229236	PASS	25919	0.683453	8.01315e-06	0.0425678	Intergenic	Intergenic
3L_5381891_SNP	5381891	T	T	A	PASS	219126	0.365217	PASS	26951	0.159375	1.314e-06	0.0258829	Intergenic	Intergenic
3L_542167_SNP	542167	C	T	C	PASS	189114	0.376238	PASS	2966	0.185393	1.24131e-05	0.0472394	Intergenic	Intergenic
3L_546441_SNP	546441	A	A	T	PASS	21131	0.384164	PASS	134198	0.596386	1.04653e-05	0.045289	Intergenic	Intergenic
3L_546637_SNP	546637	G	G	A	PASS	244133	0.352785	PASS	169212	0.556435	1.046e-05	0.045289	Intergenic	Intergenic
3L_546645_SNP	546645	G	G	A	PASS	246134	0.352632	PASS	167213	0.565263	6.74774e-06	0.039796	Intergenic	Intergenic
3L_546665_SNP	546665	A	A	T	PASS	23132	0.364649	PASS	155232	0.599483	4.5431e-07	0.0190555	Intergenic	Intergenic
3L_546675_SNP	546675	T	T	C	PASS	22313	0.368272	PASS	14423	0.614973	1.5333e-07	0.0129377	Intergenic	Intergenic
3L_5427623_SNP	5427623	C	T	C	PASS	23453	0.184669	PASS	18312	0.396396	3.66953e-06	0.0328735	FBgn0085420	CG34391	INTRON
3L_543753_SNP	543753	A	C	A	PASS	22112	0.356688	PASS	27853	0.161285	4.27599e-06	0.0356414	FBgn0085420	CG34391	INTRON
3L_543133_SNP	543133	A	C	A	PASS	2119	0.351613	PASS	27449	0.151728	2.75697e-06	0.0301364	FBgn0085420	CG34391	INTRON
3L_5431315_SNP	5431315	A	T	A	PASS	25116	0.361377	PASS	2851	0.154785	1.11445e-06	0.0254748	FBgn0085420	CG34391	INTRON
3L_5431325_SNP	5431325	C	A	C	PASS	27115	0.357143	PASS	27456	0.169697	1.22523e-05	0.0472394	FBgn0085420	CG34391	INTRON
3L_5433172_SNP	5433172	A	A	T	PASS	193117	0.377419	PASS	2966	0.185393	1.0247e-05	0.0452028	FBgn0085420	CG34391	DOWNSTREAM	269
3L_544195_SNP	544195	G	G	C	PASS	136152	0.527778	PASS	2313	0.393931	7.76579e-06	0.0424426	Intergenic	Intergenic
3L_5448825_SNP	5448825	G	G	A	PASS	24983	0.25	PASS	32231	0.878187	6.23537e-06	0.039042	Intergenic	Intergenic
3L_5474174_SNP	5474174	T	C	T	PASS	159124	0.438163	PASS	22864	0.219179	4.31893e-06	0.035772	FBgn0035607	CG4835	SYNONYMOUS_CODING
3L_55272_SNP	55272	C	C	G	PASS	26138	0.12793	PASS	221	0.3125	6.12185e-06	0.039042	FBgn0085371	CG34342	INTRON
3L_552587_SNP	552587	T	C	T	PASS	164173	0.513353	PASS	2494	0.281437	8.84661e-07	0.0238009	Intergenic	Intergenic
3L_5544548_SNP	5544548	T	T	A	PASS	22511	0.328358	PASS	31356	0.151762	1.35284e-05	0.0483215	FBgn0035612	CG1625	UPSTREAM	289
3L_563287_SNP	563287	T	T	A	PASS	2159	0.226924	PASS	3522	0.672783	8.40862e-06	0.0432966	FBgn0035625	Blimp-1	INTRON
3L_5666865_SNP	5666865	T	C	T	PASS	112147	0.567568	PASS	19298	0.337931	7.75176e-06	0.0424426	FBgn0085447	sif	INTRON
3L_5666897_SNP	5666897	C	T	C	PASS	16137	0.563786	PASS	2292	0.312925	1.21161e-06	0.0258829	FBgn0085447	sif	SYNONYMOUS_CODING
3L_5999795_SNP	5999795	G	G	T	PASS	24554	0.18621	AF	31912	0.362538	2.42765e-06	0.0290678	FBgn0052406	PVRAP	INTRON
3L_617547_SNP	617547	A	T	A	PASS	23683	0.261889	PASS	182168	0.48	2.42422e-06	0.0290678	FBgn0005658	Ets65A	INTRON
3L_6542978_SNP	6542978	C	C	T	PASS	344	0.12797	PASS	2188	0.344983	1.32755e-05	0.0479757	FBgn0020251	sfl	UTR_3_PRIME
3L_6542978_SNP	6542978	C	C	T	PASS	344	0.12797	PASS	2188	0.344983	1.32755e-05	0.0479757	FBgn0042185	CG18769	UPSTREAM	86
3L_6574629_SNP	6574629	A	A	T	PASS	29765	0.179558	AF	31616	0.481928	1.46942e-05	0.0492603	FBgn0263973	jv	INTRON
3L_6574629_SNP	6574629	A	A	T	PASS	29765	0.179558	AF	31616	0.481928	1.46942e-05	0.0492603	FBgn0042185	CG18769	INTRON
3L_6622283_SNP	6622283	G	G	T	PASS	25355	0.178571	AF	29913	0.416667	9.81726e-06	0.0446117	FBgn0004619	GluRIA	INTRON
3L_73799_SNP	73799	T	T	C	AF	27		PASS	25937	0.125	4.1937e-07	0.0190555	Intergenic	Intergenic
3L_7632745_SNP	7632745	C	T	C	PASS	24594	0.277286	PASS	31838	0.167416	5.60318e-06	0.0380783	FBgn0035802	CG33275	DOWNSTREAM	72
3L_7632745_SNP	7632745	C	T	C	PASS	24594	0.277286	PASS	31838	0.167416	5.60318e-06	0.0380783	FBgn0086074	snoRNA:Me18S-A186	UPSTREAM	72
3L_7632745_SNP	7632745	C	T	C	PASS	24594	0.277286	PASS	31838	0.167416	5.60318e-06	0.0380783	FBgn0053276	CG33276	DOWNSTREAM	166
3L_7878368_SNP	7878368	T	C	T	PASS	2652	0.215539	PASS	157123	0.439286	9.26178e-07	0.0238009	FBgn0052365	CG32365	INTRON
3L_851617_SNP	851617	G	G	T	PASS	198163	0.451524	PASS	28597	0.253927	9.50154e-06	0.0441144	FBgn0026263	bip1	UTR_5_PRIME
3L_8466137_SNP	8466137	T	C	T	PASS	15311	0.397638	PASS	24657	0.188119	7.53553e-06	0.0421062	FBgn0262719	CG43163	SYNONYMOUS_CODING
3L_8466137_SNP	8466137	T	C	T	PASS	15311	0.397638	PASS	24657	0.188119	7.53553e-06	0.0421062	FBgn0010825	Gug	DOWNSTREAM	368
3L_8466173_SNP	8466173	C	T	C	PASS	145113	0.437984	PASS	23168	0.227425	1.36178e-05	0.0484548	FBgn0262719	CG43163	SYNONYMOUS_CODING
3L_8466173_SNP	8466173	C	T	C	PASS	145113	0.437984	PASS	23168	0.227425	1.36178e-05	0.0484548	FBgn0010825	Gug	DOWNSTREAM	44
3L_8871259_SNP	8871259	T	T	C	AF	29411	0.366557	PASS	23682	0.257862	2.2706e-10	0.00017128	FBgn0263930	dally	INTRON
3L_94119_SNP	94119	T	T	C	PASS	16819	0.393518	PASS	26664	0.193939	1.14783e-05	0.046921	FBgn0035957	CG5144	SYNONYMOUS_CODING
3L_94119_SNP	94119	T	T	C	PASS	16819	0.393518	PASS	26664	0.193939	1.14783e-05	0.046921	FBgn0000116	Argk	DOWNSTREAM	691
3L_9367234_SNP	9367234	A	A	C	PASS	26962	0.187311	AF	32717	0.494186	9.1847e-06	0.0436317	FBgn0001223	Hsp22	UTR_5_PRIME
3L_9367234_SNP	9367234	A	A	C	PASS	26962	0.187311	AF	32717	0.494186	9.1847e-06	0.0436317	FBgn0001228	Hsp67Bb	DOWNSTREAM	485
3L_9656385_SNP	9656385	G	G	A	PASS	15571	0.314159	PASS	21515	0.652174	7.87942e-09	0.0023775	FBgn0016081	fry	INTRON
3L_971217_SNP	971217	A	A	T	PASS	25225	0.925271	PASS	23982	0.255452	1.32343e-05	0.0479757	FBgn0036035	CG18178	NON_SYNONYMOUS_CODING
3L_971217_SNP	971217	A	A	T	PASS	25225	0.925271	PASS	23982	0.255452	1.32343e-05	0.0479757	FBgn0036036	CG14174	UPSTREAM	411
3R_1688294_SNP	1688294	G	G	A	PASS	25557	0.182692	AF	3713	0.4625	4.4597e-06	0.035772	FBgn0266756	btsz	INTRON
3R_13455649_SNP	13455649	T	T	A	PASS	26559	0.182988	AF	34113	0.367232	1.27437e-06	0.0258829	FBgn0051591	tRNA:V4:9C	UPSTREAM	769
3R_13455649_SNP	13455649	T	T	A	PASS	26559	0.182988	AF	34113	0.367232	1.27437e-06	0.0258829	FBgn0262794	CG43175	UPSTREAM	79
3R_13455649_SNP	13455649	T	T	A	PASS	26559	0.182988	AF	34113	0.367232	1.27437e-06	0.0258829	FBgn0038531	CG14325	DOWNSTREAM	915
3R_1411536_SNP	1411536	G	A	G	PASS	16769	0.292373	PASS	1128	0.561435	6.55249e-07	0.0207258	FBgn0038597	CG864	SYNONYMOUS_CODING
3R_1411557_SNP	1411557	A	G	A	PASS	16972	0.298755	PASS	16131	0.552743	2.04977e-06	0.0276477	FBgn0038597	CG864	SYNONYMOUS_CODING
3R_1411569_SNP	1411569	C	T	C	PASS	15972	0.311688	PASS	85126	0.597156	2.62934e-07	0.0158673	FBgn0038597	CG864	SYNONYMOUS_CODING
3R_1444426_SNP	1444426	G	G	T	PASS	29938	0.11276	PASS	2495	0.283583	8.70443e-06	0.0436317	FBgn0263974	qin	INTRON
3R_1444426_SNP	1444426	G	G	T	PASS	29938	0.11276	PASS	2495	0.283583	8.70443e-06	0.0436317	FBgn0038629	CG1434	INTRON
3R_1444426_SNP	1444426	G	G	T	PASS	29938	0.11276	PASS	2495	0.283583	8.70443e-06	0.0436317	FBgn0038631	CG7695	UPSTREAM	973
3R_14447431_SNP	14447431	A	C	A	PASS	2467	0.247232	PASS	137129	0.484962	2.01058e-06	0.0276477	FBgn0263974	qin	INTRON
3R_14447431_SNP	14447431	A	C	A	PASS	2467	0.247232	PASS	137129	0.484962	2.01058e-06	0.0276477	FBgn0038629	CG1434	UPSTREAM	382
3R_1451132_SNP	1451132	T	T	G	PASS	17986	0.324528	PASS	145175	0.546875	9.2907e-06	0.0436317	FBgn0086051	snoRNA:Me28S-U2134a	EXON
3R_1451132_SNP	1451132	T	T	G	PASS	17986	0.324528	PASS	145175	0.546875	9.2907e-06	0.0436317	FBgn0037351	RpL13A	INTRON
3R_1451132_SNP	1451132	T	T	G	PASS	17986	0.324528	PASS	145175	0.546875	9.2907e-06	0.0436317	FBgn0260002	snoRNA:Me28S-U2134b	DOWNSTREAM	156
3R_14772386_SNP	14772386	T	C	T	PASS	2996	0.167139	AF	34514	0.389972	7.96617e-06	0.0425678	FBgn0261262	CG42613	INTRON
3R_14828344_SNP	14828344	G	G	C	PASS	2975	0.264845	PASS	128131	0.557915	1.59652e-06	0.0268473	FBgn0026239	gukh	INTRON
3R_14834482_SNP	14834482	A	A	G	PASS	17186	0.334633	PASS	2864	0.122699	6.55069e-07	0.0207258	FBgn0026239	gukh	SYNONYMOUS_CODING
3R_14834485_SNP	14834485	A	A	G	PASS	17288	0.338462	PASS	2794	0.125392	6.66806e-07	0.0207258	FBgn0026239	gukh	SYNONYMOUS_CODING
3R_1488966_SNP	1488966	G	G	A	PASS	21517	0.332298	PASS	28146	0.146728	3.70072e-06	0.0328735	FBgn0004876	cdi	INTRON
3R_14896444_SNP	14896444	A	T	A	PASS	243113	0.317416	PASS	3145	0.137363	5.21081e-06	0.0375027	FBgn0004876	cdi	INTRON
3R_14896451_SNP	14896451	T	C	T	PASS	24918	0.325211	PASS	33347	0.123684	3.0942e-06	0.0305108	FBgn0004876	cdi	INTRON
3R_14896471_SNP	14896471	A	T	A	PASS	2514	0.293785	PASS	3174	0.112448	1.80381e-06	0.027033	FBgn0004876	cdi	INTRON
3R_14896511_SNP	14896511	G	C	G	PASS	26713	0.278378	PASS	35339	0.994898	8.16091e-07	0.0234077	FBgn0004876	cdi	INTRON
3R_14935461_SNP	14935461	A	A	C	PASS	2164	0.241594	PASS	23619	0.74598	1.302e-05	0.0479124	FBgn0038679	CG64	INTRON
3R_15113127_SNP	15113127	C	C	T	PASS	125112	0.472574	PASS	21868	0.237762	3.0443e-06	0.0305108	FBgn0263405	CR43451	UPSTREAM	952
3R_1585274_SNP	1585274	T	C	T	PASS	22369	0.236314	PASS	164136	0.453333	5.48262e-06	0.0377694	FBgn0038765	CG4424	INTRON
3R_1585274_SNP	1585274	T	C	T	PASS	22369	0.236314	PASS	164136	0.453333	5.48262e-06	0.0377694	FBgn0243511	psidin	DOWNSTREAM	536
3R_15852745_SNP	15852745	A	G	A	PASS	21767	0.235915	PASS	15113	0.462633	3.15781e-06	0.0308118	FBgn0038765	CG4424	INTRON
3R_15852745_SNP	15852745	A	G	A	PASS	21767	0.235915	PASS	15113	0.462633	3.15781e-06	0.0308118	FBgn0243511	psidin	DOWNSTREAM	541
3R_15882353_SNP	15882353	A	G	A	PASS	2725	0.177586	PASS	17382	0.321569	1.28404e-06	0.0258829	FBgn0038771	CG439	SYNONYMOUS_CODING
3R_15882353_SNP	15882353	A	G	A	PASS	2725	0.177586	PASS	17382	0.321569	1.28404e-06	0.0258829	FBgn0040571	CG17193	UPSTREAM	534
3R_15957141_SNP	15957141	G	C	G	PASS	26142	0.138614	PASS	2999	0.321429	1.24139e-05	0.0472394	Intergenic	Intergenic
3R_1595828_SNP	1595828	C	G	C	PASS	26934	0.112211	PASS	22995	0.293299	4.95669e-06	0.0373356	Intergenic	Intergenic
3R_165541_SNP	165541	G	G	T	PASS	2793	0.256198	PASS	22168	0.454545	1.03537e-05	0.045289	Intergenic	Intergenic
3R_167752_SNP	167752	T	T	C	PASS	25728	0.982456	PASS	21586	0.285714	2.34493e-06	0.0290257	Intergenic	Intergenic
3R_161332_SNP	161332	A	A	C	PASS	36533	0.829146	PASS	3491	0.233797	9.30739e-06	0.0436317	Intergenic	Intergenic
3R_161333_SNP	161333	T	T	C	PASS	36734	0.847883	PASS	3491	0.233797	1.23872e-05	0.0472394	Intergenic	Intergenic
3R_1634732_SNP	1634732	A	C	A	PASS	22113	0.555556	PASS	19454	0.217742	1.20426e-05	0.0472394	FBgn0083975	Nlg4	INTRON
3R_1634732_SNP	1634732	A	C	A	PASS	22113	0.555556	PASS	19454	0.217742	1.20426e-05	0.0472394	FBgn0038775	CG17199	NON_SYNONYMOUS_CODING
3R_1651653_SNP	1651653	T	T	C	PASS	33727	0.741758	PASS	2618	0.234641	2.91393e-06	0.0301555	FBgn0083975	Nlg4	INTRON
3R_1651694_SNP	1651694	A	A	G	PASS	33519	0.536723	PASS	372	0.193548	6.23078e-06	0.039042	FBgn0083975	Nlg4	INTRON
3R_16447185_SNP	16447185	A	A	T	PASS	256194	0.431111	PASS	3215	0.247588	1.23187e-05	0.0472394	FBgn0038815	CG5466	DOWNSTREAM	194
3R_16447185_SNP	16447185	A	A	T	PASS	256194	0.431111	PASS	3215	0.247588	1.23187e-05	0.0472394	FBgn0001169	H	UPSTREAM	475
3R_1657457_SNP	1657457	G	G	C	PASS	15118	0.416988	PASS	225	0.198413	7.38166e-06	0.0418667	FBgn0051200	CG312	SYNONYMOUS_CODING
3R_1657457_SNP	1657457	G	G	C	PASS	15118	0.416988	PASS	225	0.198413	7.38166e-06	0.0418667	FBgn0259222	CG42322	INTRON
3R_1657457_SNP	1657457	G	G	C	PASS	15118	0.416988	PASS	225	0.198413	7.38166e-06	0.0418667	FBgn0051199	CG31199	UPSTREAM	866
3R_16686_SNP	16686	A	A	G	PASS	269118	0.349956	PASS	187192	0.565963	8.97504e-06	0.0436317	FBgn0037387	CG1213	INTRON
3R_16723633_SNP	16723633	T	G	T	PASS	1964	0.251968	PASS	2522	0.888235	1.13222e-05	0.0467245	FBgn0038839	CG183	UPSTREAM	591
3R_16949388_SNP	16949388	A	A	T	PASS	17617	0.491329	PASS	281112	0.284987	6.13113e-06	0.039042	FBgn0023423	slmb	INTRON
3R_16949393_SNP	16949393	C	C	T	PASS	223116	0.342183	PASS	33355	0.141753	6.63422e-07	0.0207258	FBgn0023423	slmb	INTRON
3R_1694941_SNP	1694941	A	A	T	PASS	233121	0.341879	PASS	34562	0.152334	2.21319e-06	0.0285384	FBgn0023423	slmb	INTRON
3R_16949417_SNP	16949417	G	G	T	PASS	229124	0.351275	PASS	3437	0.169492	7.82079e-06	0.0424426	FBgn0023423	slmb	INTRON
3R_16976997_SNP	16976997	C	C	A	AF	3914	0.433437	PASS	25756	0.178914	1.098e-05	0.0462697	FBgn0264357	SNF4Agamma	INTRON
3R_16985364_SNP	16985364	G	G	T	PASS	116174	0.6	PASS	16711	0.376866	1.339e-05	0.0481014	FBgn0264357	SNF4Agamma	INTRON
3R_16985364_SNP	16985364	G	G	T	PASS	116174	0.6	PASS	16711	0.376866	1.339e-05	0.0481014	FBgn0038865	CG1824	SYNONYMOUS_CODING
3R_1699723_SNP	1699723	A	A	T	PASS	141197	0.582842	PASS	221129	0.368571	7.27319e-06	0.041564	FBgn0264357	SNF4Agamma	INTRON
3R_178281_SNP	178281	T	T	A	PASS	18914	0.354949	PASS	21539	0.153543	7.64096e-06	0.0423814	FBgn0038874	ETHR	INTRON
3R_17522722_SNP	17522722	G	A	G	PASS	21418	0.335437	PASS	162195	0.546218	9.99341e-06	0.0448283	FBgn0051176	CG31176	INTRON
3R_17522729_SNP	17522729	A	C	A	PASS	26111	0.351577	PASS	1582	0.558659	1.38262e-05	0.0486935	FBgn0051176	CG31176	INTRON
3R_17571791_SNP	17571791	G	G	T	PASS	28851	0.154425	AF	3241	0.299412	1.257e-05	0.0472752	FBgn0051343	CG31343	INTRON
3R_17658539_SNP	17658539	A	C	A	PASS	13149	0.59127	PASS	1793	0.353612	6.25519e-06	0.039042	FBgn0041229	Gr93a	NON_SYNONYMOUS_CODING
3R_1843_SNP	1843	T	T	A	AF	224		PASS	17328	0.139335	1.28493e-06	0.0258829	FBgn0053110	CG3311	INTRON
3R_18421442_SNP	18421442	C	C	T	PASS	135188	0.582433	PASS	29121	0.366667	9.22016e-06	0.0436317	FBgn0051158	Efa6	INTRON
3R_18544196_SNP	18544196	T	C	T	PASS	21179	0.461542	PASS	3218	0.263415	7.37722e-06	0.0418667	FBgn0051151	wge	INTRON
3R_18611492_SNP	18611492	G	G	A	PASS	2887	0.294915	PASS	29136	0.119174	3.31487e-06	0.0313845	FBgn0039026	CG729	INTRON
3R_1886394_SNP	1886394	G	G	T	PASS	22712	0.345821	PASS	3497	0.167644	1.01559e-05	0.0451976	FBgn0039040	CG13833	INTRON
3R_239199_SNP	239199	G	G	C	PASS	21666	0.234426	PASS	3625	0.755287	1.0607e-05	0.0454618	FBgn0011725	twin	INTRON
3R_239218_SNP	239218	T	T	G	PASS	2364	0.239737	PASS	3425	0.759878	8.04574e-06	0.042591	FBgn0011725	twin	INTRON
3R_239222_SNP	239222	C	C	A	PASS	2369	0.253676	PASS	29829	0.886852	1.2683e-05	0.0473302	FBgn0011725	twin	INTRON
3R_2135_SNP	2135	T	T	A	PASS	25813	0.335516	PASS	37769	0.154785	3.4051e-06	0.0315457	FBgn0259685	crb	INTRON
3R_2138_SNP	2138	G	G	T	PASS	267133	0.3325	PASS	3687	0.159817	8.60409e-06	0.0436317	FBgn0259685	crb	INTRON
3R_2223588_SNP	2223588	G	G	A	PASS	29148	0.141593	AF	41511	0.258216	6.80555e-06	0.039796	FBgn0000036	nAChRalpha1	UTR_3_PRIME
3R_222438_SNP	222438	G	G	A	PASS	164231	0.584811	PASS	237147	0.382812	1.122e-05	0.0465031	FBgn0000036	nAChRalpha1	UTR_3_PRIME
3R_234561_SNP	234561	A	C	A	PASS	22793	0.29625	PASS	2543	0.156338	3.38578e-06	0.0315457	Intergenic	Intergenic
3R_23114_SNP	23114	A	A	C	PASS	1834	0.179372	PASS	12888	0.474741	7.15485e-06	0.0413577	Intergenic	Intergenic
3R_23115_SNP	23115	T	T	G	PASS	18142	0.188348	PASS	1391	0.411765	1.14241e-05	0.046921	Intergenic	Intergenic
3R_234979_SNP	234979	G	G	T	PASS	23525	0.961538	PASS	22684	0.279677	9.56098e-06	0.0442467	FBgn0039202	CG13622	NON_SYNONYMOUS_CODING
3R_2376849_SNP	2376849	C	T	C	PASS	23794	0.283988	PASS	168167	0.498575	5.40583e-06	0.037693	FBgn0266758	Esyt2	INTRON
3R_238421_SNP	238421	T	C	T	PASS	25548	0.158416	AF	2859	0.361224	1.29417e-05	0.0477381	FBgn0266758	Esyt2	INTRON
3R_238421_SNP	238421	T	C	T	PASS	25548	0.158416	AF	2859	0.361224	1.29417e-05	0.0477381	FBgn0011845	tRNA:D:96A	UPSTREAM	63
3R_2397113_SNP	2397113	C	C	T	PASS	25383	0.247238	PASS	29928	0.856269	7.52774e-06	0.0421062	FBgn0039209	CG13624	INTRON
3R_243531_SNP	243531	C	C	T	PASS	267	0.253623	PASS	152141	0.481229	3.5485e-06	0.0322464	FBgn0263490	mld	INTRON
3R_2488277_SNP	2488277	T	A	T	PASS	18473	0.284467	PASS	24127	0.174627	8.88445e-06	0.0436317	FBgn0003429	slo	UTR_5_PRIME
3R_2488277_SNP	2488277	T	A	T	PASS	18473	0.284467	PASS	24127	0.174627	8.88445e-06	0.0436317	FBgn0020018	Ppox	UPSTREAM	74
3R_2489427_SNP	2489427	A	G	A	PASS	2156	0.217899	PASS	23614	0.56	8.79233e-06	0.0436317	FBgn0003429	slo	INTRON
3R_256181_SNP	256181	G	G	A	PASS	31943	0.118785	PASS	26715	0.282259	1.32271e-05	0.0479757	FBgn0003429	slo	INTRON
3R_2524829_SNP	2524829	C	C	T	PASS	21888	0.287582	PASS	32339	0.177348	3.05576e-06	0.0305108	FBgn0003429	slo	INTRON
3R_25253_SNP	25253	A	A	G	PASS	22811	0.369988	PASS	29844	0.128655	7.4322e-06	0.0419955	FBgn0003429	slo	INTRON
3R_25254_SNP	25254	C	C	T	PASS	251	0.327869	PASS	28338	0.118386	3.36601e-07	0.0188082	FBgn0003429	slo	INTRON
3R_2566838_SNP	2566838	G	G	T	PASS	31296	0.235294	PASS	22617	0.429293	6.2396e-06	0.039042	FBgn0004885	tok	INTRON
3R_257967_SNP	257967	T	T	C	PASS	23167	0.224832	PASS	28818	0.588235	1.85436e-06	0.027033	FBgn0003719	tld	SYNONYMOUS_CODING
3R_257967_SNP	257967	T	T	C	PASS	23167	0.224832	PASS	28818	0.588235	1.85436e-06	0.027033	FBgn0000140	asp	UPSTREAM	54
3R_29514_SNP	29514	C	C	T	PASS	31921	0.617647	PASS	26879	0.227666	8.30537e-07	0.0234077	Intergenic	Intergenic
3R_2932961_SNP	2932961	T	T	A	PASS	31737	0.145198	PASS	2681	0.271739	5.58083e-06	0.0380783	FBgn0054027	CG3427	SYNONYMOUS_CODING
3R_211988_SNP	211988	A	A	T	PASS	33475	0.183375	PASS	3492	0.54254	1.46772e-05	0.0492603	FBgn0083946	lobo	UPSTREAM	382
3R_213498_SNP	213498	G	G	T	PASS	3423	0.633688	PASS	2747	0.234884	1.39221e-05	0.0487628	FBgn0039290	CG13654	INTRON
3R_213498_SNP	213498	G	G	T	PASS	3423	0.633688	PASS	2747	0.234884	1.39221e-05	0.0487628	FBgn0022800	Cad96Ca	UPSTREAM	93
3R_2138881_SNP	2138881	T	T	C	PASS	3277	0.193955	PASS	254154	0.37746	8.2856e-06	0.0432481	FBgn0011666	msi	INTRON
3R_21524347_SNP	21524347	A	G	A	PASS	33825	0.688752	PASS	23672	0.233766	1.91198e-06	0.0272128	FBgn0051092	LpR2	DOWNSTREAM	12
3R_2173861_SNP	2173861	C	C	A	PASS	265121	0.313472	PASS	21216	0.574225	1.51131e-05	0.0497139	FBgn0250757	CG42235	INTRON
3R_2173862_SNP	2173862	C	C	T	PASS	278114	0.298163	PASS	29213	0.547393	1.50255e-06	0.0268262	FBgn0250757	CG42235	INTRON
3R_2173863_SNP	2173863	C	C	T	PASS	26617	0.286863	PASS	19821	0.537594	1.54e-06	0.0268473	FBgn0250757	CG42235	INTRON
3R_21757681_SNP	21757681	C	C	T	PASS	2453	0.188874	PASS	14699	0.448163	2.41594e-06	0.0290678	FBgn0039396	CCAP-R	INTRON
3R_21757681_SNP	21757681	C	C	T	PASS	2453	0.188874	PASS	14699	0.448163	2.41594e-06	0.0290678	FBgn0054024	CR3424	EXON
3R_21758722_SNP	21758722	A	A	G	PASS	17564	0.267782	PASS	21817	0.723443	1.63e-06	0.0268473	FBgn0039396	CCAP-R	INTRON
3R_21758722_SNP	21758722	A	A	G	PASS	17564	0.267782	PASS	21817	0.723443	1.63e-06	0.0268473	FBgn0054024	CR3424	DOWNSTREAM	984
3R_21775_SNP	21775	T	T	C	PASS	134192	0.588958	PASS	22129	0.369628	5.09354e-06	0.0375027	FBgn0039396	CCAP-R	INTRON
3R_21873494_SNP	21873494	G	A	G	PASS	1119	0.519476	PASS	16262	0.276786	1.00331e-05	0.0448283	FBgn0001139	gro	SYNONYMOUS_CODING
3R_2198476_SNP	2198476	T	G	T	PASS	3222	0.679123	PASS	22566	0.226841	6.3143e-06	0.039042	FBgn0039411	dys	INTRON
3R_2286787_SNP	2286787	G	G	T	PASS	23152	0.183746	PASS	181114	0.386447	9.28302e-06	0.0436317	FBgn0000064	Ald	INTRON
3R_2286787_SNP	2286787	G	G	T	PASS	23152	0.183746	PASS	181114	0.386447	9.28302e-06	0.0436317	FBgn0265380	CR44321	EXON
3R_22139556_SNP	22139556	C	C	T	PASS	29867	0.183562	AF	37317	0.435897	2.06762e-06	0.0276477	Intergenic	Intergenic
3R_2224824_SNP	2224824	T	T	A	PASS	24562	0.219544	PASS	28916	0.524592	6.29604e-06	0.039042	Intergenic	Intergenic
3R_22314_SNP	22314	G	G	C	PASS	22876	0.25	PASS	175156	0.4713	2.6938e-06	0.0296647	FBgn0039431	plum	SYNONYMOUS_CODING
3R_22398324_SNP	22398324	C	C	A	PASS	14141	0.517794	PASS	21282	0.278912	6.70035e-06	0.039796	FBgn0263289	scrib	INTRON
3R_224984_SNP	224984	G	G	T	PASS	28228	0.932258	PASS	2368	0.253165	1.19484e-05	0.0470661	FBgn0250908	beat-VII	INTRON
3R_23139298_SNP	23139298	T	T	C	PASS	196113	0.365696	PASS	137198	0.591448	3.92831e-06	0.033866	FBgn0039510	CG3339	INTRON
3R_23259642_SNP	23259642	A	A	T	PASS	23157	0.197917	PASS	176121	0.474741	6.1504e-06	0.039042	FBgn0016061	side	INTRON
3R_24972531_SNP	24972531	C	C	G	PASS	1791	0.358423	PASS	118171	0.591696	4.53e-06	0.035772	FBgn0039641	CG14511	UTR_5_PRIME
3R_24972531_SNP	24972531	C	C	G	PASS	1791	0.358423	PASS	118171	0.591696	4.53e-06	0.035772	FBgn0039642	CG11882	DOWNSTREAM	27
3R_25114512_SNP	25114512	A	A	G	PASS	2911	0.325865	PASS	12216	0.567376	1.33937e-06	0.0259061	Intergenic	Intergenic
3R_267921_SNP	267921	G	G	T	PASS	173166	0.489676	PASS	2971	0.251889	1.5436e-07	0.0129377	FBgn0039809	CG15547	UTR_5_PRIME
3R_267921_SNP	267921	G	G	T	PASS	173166	0.489676	PASS	2971	0.251889	1.5436e-07	0.0129377	FBgn0000416	Sap-r	UTR_3_PRIME
3R_3813287_SNP	3813287	A	G	A	PASS	181179	0.497222	PASS	25513	0.287795	5.4425e-06	0.037693	FBgn0037534	CG2781	INTRON
3R_3814398_SNP	3814398	C	C	T	PASS	2322	0.873159	PASS	22682	0.266234	4.94686e-06	0.0373356	FBgn0037534	CG2781	INTRON
3R_3815588_SNP	3815588	C	C	A	PASS	13921	0.617192	PASS	235146	0.383221	3.26879e-06	0.0312123	FBgn0037534	CG2781	INTRON
3R_392641_SNP	392641	A	A	C	PASS	2928	0.88531	PASS	2782	0.283737	4.51499e-07	0.0190555	FBgn0037548	CG79	SYNONYMOUS_CODING
3R_469911_SNP	469911	C	C	A	AF	283		PASS	24731	0.111518	2.02448e-06	0.0276477	FBgn0042182	CG18749	INTRON
3R_469911_SNP	469911	C	C	A	AF	283		PASS	24731	0.111518	2.02448e-06	0.0276477	FBgn0064126	CG33722	INTRON
3R_469911_SNP	469911	C	C	A	AF	283		PASS	24731	0.111518	2.02448e-06	0.0276477	FBgn0037556	CG9636	UPSTREAM	397
3R_4227681_SNP	4227681	A	A	T	PASS	32745	0.129677	PASS	276115	0.294118	4.03491e-06	0.0341987	FBgn0266801	CG45263	INTRON
3R_4572319_SNP	4572319	G	G	T	PASS	32646	0.123656	PASS	24315	0.317241	3.9524e-06	0.0338801	FBgn0037623	CG981	INTRON
3R_4631427_SNP	4631427	C	C	A	PASS	24934	0.121413	PASS	241	0.294118	1.45847e-05	0.0492603	FBgn0037632	Tcp-1eta	INTRON
3R_4631427_SNP	4631427	C	C	A	PASS	24934	0.121413	PASS	241	0.294118	1.45847e-05	0.0492603	FBgn0037633	CG9839	INTRON
3R_4631427_SNP	4631427	C	C	A	PASS	24934	0.121413	PASS	241	0.294118	1.45847e-05	0.0492603	FBgn0037634	hng2	UPSTREAM	617
3R_4656957_SNP	4656957	T	T	C	PASS	124188	0.625641	PASS	19117	0.381175	7.61767e-06	0.0423814	FBgn0262614	pyd	INTRON
3R_46791_SNP	46791	A	A	G	PASS	167165	0.496988	PASS	23391	0.288642	4.99895e-06	0.0373356	FBgn0262614	pyd	INTRON
3R_498331_SNP	498331	A	T	A	PASS	21261	0.223443	PASS	18138	0.433962	8.5739e-06	0.0436317	FBgn0003165	pum	INTRON
3R_533291_SNP	533291	A	T	A	PASS	21341	0.161417	PASS	17131	0.435216	6.07752e-09	0.00229225	FBgn0037698	CG16779	INTRON
3R_5312697_SNP	5312697	T	G	T	PASS	27986	0.235616	PASS	188145	0.435435	8.90951e-06	0.0436317	FBgn0037698	CG16779	UTR_5_PRIME
3R_5642523_SNP	5642523	C	C	T	PASS	21454	0.214925	PASS	1712	0.413793	7.24286e-06	0.041548	FBgn0037763	CG1694	NON_SYNONYMOUS_CODING
3R_5642523_SNP	5642523	C	C	T	PASS	21454	0.214925	PASS	1712	0.413793	7.24286e-06	0.041548	FBgn0037764	CG9459	DOWNSTREAM	627
3R_58799_SNP	58799	C	C	A	PASS	15233	0.178378	PASS	1329	0.454541	1.42938e-05	0.0490633	FBgn0267336	Glut4EF	INTRON
3R_584345_SNP	584345	G	G	A	PASS	25155	0.179739	PASS	25123	0.375	9.00423e-06	0.0436317	FBgn0267336	Glut4EF	INTRON
3R_5865598_SNP	5865598	C	C	T	PASS	3334	0.934659	PASS	3913	0.25	6.73899e-06	0.039796	FBgn0053208	Mical	INTRON
3R_6648163_SNP	6648163	A	A	C	PASS	2213	0.337749	PASS	131169	0.563333	5.43463e-06	0.037693	Intergenic	Intergenic
3R_664817_SNP	664817	T	T	C	PASS	2614	0.335484	PASS	128182	0.587968	3.35069e-07	0.0188082	Intergenic	Intergenic
3R_688992_SNP	688992	A	A	C	PASS	22324	0.97166	PASS	2982	0.281787	5.91529e-06	0.039042	Intergenic	Intergenic
3R_696169_SNP	696169	T	T	A	PASS	1414	0.5	PASS	2682	0.284722	1.504e-05	0.0497139	Intergenic	Intergenic
3R_7229919_SNP	7229919	G	G	A	PASS	2795	0.151976	PASS	2116	0.335443	1.20956e-05	0.0472394	FBgn0004595	pros	UTR_3_PRIME
3R_738154_SNP	738154	A	G	A	PASS	22582	0.267198	PASS	2733	0.9999	1.23928e-05	0.0472394	FBgn0037910	CG1478	DOWNSTREAM	463
3R_7652761_SNP	7652761	A	A	T	PASS	21214	0.329114	PASS	3642	0.126897	2.5137e-07	0.0158015	FBgn0037956	CG6959	INTRON
3R_7652765_SNP	7652765	A	A	T	PASS	23193	0.287374	PASS	31527	0.789474	2.58406e-08	0.00378329	FBgn0037956	CG6959	INTRON
3R_7864662_SNP	7864662	A	A	G	PASS	27132	0.156156	PASS	22596	0.299654	1.0771e-06	0.0249999	Intergenic	Intergenic
3R_7864718_SNP	7864718	C	C	A	PASS	24524	0.892193	PASS	19169	0.265385	9.93144e-06	0.0447264	Intergenic	Intergenic
3R_7899815_SNP	7899815	T	T	A	PASS	33224	0.674157	PASS	28577	0.212772	9.14524e-06	0.0436317	FBgn0037989	CG14741	INTRON
3R_8412_SNP	8412	A	A	C	PASS	21752	0.193385	PASS	15917	0.422556	1.109e-05	0.046396	FBgn0037998	CG4848	UTR_3_PRIME
3R_8412_SNP	8412	A	A	C	PASS	21752	0.193385	PASS	15917	0.422556	1.109e-05	0.046396	FBgn0037997	CG14742	UPSTREAM	121
3R_8721735_SNP	8721735	C	C	T	PASS	3271	0.193485	PASS	225139	0.381868	5.9736e-06	0.039042	Intergenic	Intergenic
3R_8758847_SNP	8758847	C	C	G	PASS	26737	0.121715	PASS	22716	0.318318	1.3154e-06	0.0258829	FBgn0038092	beat-Vb	INTRON
3R_8794783_SNP	8794783	A	A	G	PASS	24533	0.118754	PASS	17185	0.332313	9.36284e-07	0.0238009	FBgn0038098	CG7381	SYNONYMOUS_CODING
3R_8794798_SNP	8794798	G	G	A	PASS	25138	0.131488	PASS	17511	0.365942	1.0712e-07	0.0101006	FBgn0038098	CG7381	SYNONYMOUS_CODING
3R_8816_SNP	8816	C	C	T	PASS	25236	0.125	PASS	22398	0.352959	1.05765e-05	0.0454618	FBgn0038100	Paip2	UTR_3_PRIME
3R_88238_SNP	88238	C	C	G	PASS	24232	0.116788	PASS	16375	0.315126	5.17305e-06	0.0375027	FBgn0038107	CG17327	UTR_5_PRIME
3R_88238_SNP	88238	C	C	G	PASS	24232	0.116788	PASS	16375	0.315126	5.17305e-06	0.0375027	FBgn0265083	CG44194	NON_SYNONYMOUS_CODING
3R_88238_SNP	88238	C	C	G	PASS	24232	0.116788	PASS	16375	0.315126	5.17305e-06	0.0375027	FBgn0038106	CG7488	DOWNSTREAM	433
3R_88238_SNP	88238	C	C	G	PASS	24232	0.116788	PASS	16375	0.315126	5.17305e-06	0.0375027	FBgn0038108	CG7518	UPSTREAM	731
X_1287265_SNP	1287265	T	A	T	PASS	1323	0.18254	PASS	7672	0.486486	1.04429e-05	0.045289	FBgn0000711	flw	INTRON
X_1728838_SNP	1728838	C	A	C	PASS	1911	0.916667	PASS	7957	0.419118	5.10295e-07	0.0194561	FBgn0003321	sbr	INTRON
X_14251946_SNP	14251946	G	G	T	PASS	1942	0.934579	PASS	13364	0.324873	8.95699e-06	0.0436317	FBgn0052600	dpr8	INTRON
X_1425862_SNP	1425862	G	G	A	PASS	9179	0.464759	PASS	15831	0.164212	1.24096e-06	0.0258829	FBgn0052600	dpr8	INTRON
X_143182_SNP	143182	T	T	A	PASS	1569	0.396552	PASS	13821	0.132755	1.157e-05	0.046921	FBgn0052600	dpr8	INTRON
X_1432388_SNP	1432388	C	G	C	PASS	9446	0.328571	PASS	1613	0.751445	6.45193e-06	0.0392495	FBgn0052600	dpr8	INTRON
X_1516793_SNP	1516793	T	T	G	PASS	7276	0.513514	PASS	12935	0.213415	7.98773e-06	0.0425678	FBgn0025390	Mur2B	INTRON
X_1516793_SNP	1516793	T	T	G	PASS	7276	0.513514	PASS	12935	0.213415	7.98773e-06	0.0425678	FBgn0000210	br	INTRON
X_1724517_SNP	1724517	G	G	A	PASS	7314	0.587576	PASS	11444	0.278481	4.91591e-06	0.0373356	Intergenic	Intergenic
X_17227393_SNP	17227393	T	T	C	PASS	1236	0.268696	PASS	5174	0.592	6.09589e-06	0.039042	Intergenic	Intergenic
X_18162815_SNP	18162815	C	C	T	PASS	15614	0.823529	PASS	11457	0.333333	5.10812e-06	0.0375027	Intergenic	Intergenic
X_265834_SNP	265834	A	A	C	PASS	14653	0.266332	PASS	8318	0.565445	3.09379e-06	0.0305108	FBgn0085387	shakB	INTRON
X_5223766_SNP	5223766	G	G	A	PASS	1129	0.445545	PASS	17841	0.187215	1.26282e-05	0.0472752	FBgn0026751	XRCC1	UPSTREAM	143
X_5223766_SNP	5223766	G	G	A	PASS	1129	0.445545	PASS	17841	0.187215	1.26282e-05	0.0472752	FBgn0029756	CG339	UPSTREAM	386
X_5842482_SNP	5842482	G	G	T	PASS	11159	0.347588	PASS	15115	0.936145	5.19945e-06	0.0375027	FBgn0029826	CG641	INTRON
X_5842482_SNP	5842482	G	G	T	PASS	11159	0.347588	PASS	15115	0.936145	5.19945e-06	0.0375027	FBgn0052756	CG32756	DOWNSTREAM	96
X_643781_SNP	643781	G	C	G	PASS	1132	0.744186	PASS	3914	0.264159	1.38256e-05	0.0486935	FBgn0085446	CG34417	INTRON
X_6437819_SNP	6437819	A	T	A	PASS	1132	0.744186	PASS	4111	0.211538	1.51141e-06	0.0268262	FBgn0085446	CG34417	INTRON
X_6437829_SNP	6437829	G	A	G	PASS	1129	0.725	PASS	412	0.237692	1.15623e-05	0.046921	FBgn0085446	CG34417	INTRON
X_644865_SNP	644865	T	C	T	PASS	8513	0.132654	PASS	5549	0.471154	5.8808e-06	0.039042	FBgn0085446	CG34417	INTRON
X_6631251_SNP	6631251	A	G	A	PASS	767	0.489519	PASS	12526	0.172185	2.67633e-06	0.0296647	FBgn0029896	CG3168	INTRON
X_6775688_SNP	6775688	C	G	C	PASS	98	0.475882	PASS	14134	0.194286	1.42453e-05	0.0490633	FBgn0263993	CG43736	DOWNSTREAM	75
X_682311_SNP	682311	A	A	C	PASS	1161	0.793658	PASS	845	0.373134	2.28278e-06	0.0287076	FBgn0029922	CG14431	INTRON
X_6823113_SNP	6823113	C	C	T	PASS	1711	0.932234	PASS	8354	0.394166	2.87645e-06	0.0301364	FBgn0029922	CG14431	INTRON
X_722296_SNP	722296	A	A	G	PASS	9297	0.513228	PASS	12532	0.238217	1.88143e-06	0.027033	FBgn0029941	CG1677	INTRON
X_722296_SNP	722296	A	A	G	PASS	9297	0.513228	PASS	12532	0.238217	1.88143e-06	0.027033	FBgn0029944	Dok	UTR_3_PRIME
X_722296_SNP	722296	A	A	G	PASS	9297	0.513228	PASS	12532	0.238217	1.88143e-06	0.027033	FBgn0265457	CR44357	INTRON
X_722296_SNP	722296	A	A	G	PASS	9297	0.513228	PASS	12532	0.238217	1.88143e-06	0.027033	FBgn0029945	CG18155	UPSTREAM	983
X_7475644_SNP	7475644	G	G	T	PASS	7298	0.576476	PASS	15356	0.267943	2.08914e-06	0.0276477	Intergenic	Intergenic
X_7484197_SNP	7484197	C	C	A	PASS	6596	0.596273	PASS	11143	0.279228	4.39645e-06	0.035772	Intergenic	Intergenic
X_762464_SNP	762464	T	T	C	PASS	679	0.568345	PASS	11128	0.214389	2.02814e-07	0.0145834	FBgn0027553	NELF-B	SYNONYMOUS_CODING
X_762464_SNP	762464	T	T	C	PASS	679	0.568345	PASS	11128	0.214389	2.02814e-07	0.0145834	FBgn0022786	Hira	DOWNSTREAM	514
X_7682238_SNP	7682238	T	T	C	PASS	16123	0.125	PASS	1382	0.386792	3.72602e-06	0.0328735	Intergenic	Intergenic
X_7685499_SNP	7685499	T	T	C	PASS	1515	0.9999	PASS	13467	0.333333	8.3132e-06	0.0432481	Intergenic	Intergenic
X_7686685_SNP	7686685	A	A	T	PASS	13711	0.743243	PASS	11156	0.335329	3.45223e-06	0.0317579	Intergenic	Intergenic
X_7695257_SNP	7695257	T	T	A	PASS	1455	0.282513	PASS	649	0.584416	6.41854e-06	0.0392045	Intergenic	Intergenic
X_7746849_SNP	7746849	G	C	G	PASS	8398	0.541436	PASS	14346	0.243386	3.9029e-06	0.0338403	FBgn0029963	CG192	UTR_3_PRIME
X_7746872_SNP	7746872	T	C	T	PASS	7714	0.574586	PASS	13452	0.27957	6.8047e-06	0.039796	FBgn0029963	CG192	UTR_3_PRIME
X_7746874_SNP	7746874	T	A	T	PASS	8298	0.544444	PASS	1435	0.259674	1.022e-05	0.0452028	FBgn0029963	CG192	UTR_3_PRIME
X_7752487_SNP	7752487	G	A	G	PASS	5699	0.638797	PASS	1449	0.322614	5.44654e-06	0.037693	FBgn0029964	CG149	SYNONYMOUS_CODING
X_7777545_SNP	7777545	C	C	T	PASS	193	0.215827	PASS	597	0.542636	4.61365e-06	0.035772	FBgn0259188	Ir7f	SYNONYMOUS_CODING
X_7777554_SNP	7777554	A	A	G	PASS	1626	0.19697	PASS	5869	0.543379	1.41259e-06	0.0263103	FBgn0259188	Ir7f	SYNONYMOUS_CODING
X_7777569_SNP	7777569	T	T	C	PASS	11424	0.173913	PASS	6464	0.5	2.86207e-06	0.0301364	FBgn0259188	Ir7f	SYNONYMOUS_CODING
X_7777623_SNP	7777623	G	G	A	PASS	11327	0.192857	PASS	6971	0.571429	5.30986e-06	0.0376097	FBgn0259188	Ir7f	SYNONYMOUS_CODING
X_7816391_SNP	7816391	T	T	C	PASS	12839	0.233533	PASS	839	0.522312	1.317e-05	0.0479757	FBgn0029979	CG1777	UTR_3_PRIME
X_7816391_SNP	7816391	T	T	C	PASS	12839	0.233533	PASS	839	0.522312	1.317e-05	0.0479757	FBgn0260858	Ykt6	DOWNSTREAM	392
X_7878788_SNP	7878788	T	T	C	PASS	1112	0.983666	PASS	8853	0.375887	1.06426e-05	0.0454852	FBgn0003447	sn	SYNONYMOUS_CODING
X_7881985_SNP	7881985	C	C	A	PASS	668	0.547945	PASS	11537	0.243422	1.11739e-05	0.0465031	Intergenic	Intergenic
X_7916736_SNP	7916736	G	G	A	PASS	12639	0.236364	PASS	7788	0.533333	8.4741e-06	0.0434853	FBgn0010329	Tbh	SYNONYMOUS_CODING
X_7951182_SNP	7951182	A	C	A	PASS	8972	0.44725	PASS	1428	0.166667	9.31241e-06	0.0436317	FBgn0004656	fs_1_h	INTRON
X_795142_SNP	795142	C	T	C	PASS	1296	0.484848	PASS	14633	0.184358	1.29038e-06	0.0258829	FBgn0004656	fs_1_h	INTRON
X_7951449_SNP	7951449	A	T	A	PASS	9489	0.486339	PASS	15131	0.173297	4.00647e-07	0.0190506	FBgn0004656	fs_1_h	INTRON
X_7953482_SNP	7953482	G	A	G	PASS	1287	0.463175	PASS	15434	0.188516	5.22019e-06	0.0375027	FBgn0004656	fs_1_h	INTRON
X_7955551_SNP	7955551	T	A	T	PASS	7281	0.529412	PASS	14732	0.17878	8.84871e-08	0.00889989	FBgn0004656	fs_1_h	UPSTREAM	82
X_7955551_SNP	7955551	T	A	T	PASS	7281	0.529412	PASS	14732	0.17878	8.84871e-08	0.00889989	FBgn0004657	mys	UPSTREAM	127
X_796456_SNP	796456	T	A	T	PASS	194	0.484537	PASS	1534	0.272539	7.79931e-06	0.0424426	FBgn0004657	mys	INTRON
X_796251_SNP	796251	C	T	C	PASS	5556	0.54545	PASS	11726	0.181818	6.3531e-06	0.0391215	FBgn0004657	mys	SYNONYMOUS_CODING
X_79652_SNP	79652	G	A	G	PASS	12133	0.214286	PASS	5785	0.598592	3.69498e-08	0.0042881	FBgn0029992	Upf2	UTR_3_PRIME
X_79652_SNP	79652	G	A	G	PASS	12133	0.214286	PASS	5785	0.598592	3.69498e-08	0.0042881	FBgn0004657	mys	DOWNSTREAM	732
X_7998985_SNP	7998985	A	A	G	PASS	7366	0.474821	PASS	12524	0.161738	2.63591e-06	0.0296647	FBgn0040319	Gclc	SYNONYMOUS_CODING
X_886615_SNP	886615	T	G	T	PASS	14718	0.19991	PASS	9354	0.367347	1.43742e-05	0.0490633	FBgn0261873	sdt	INTRON
X_886616_SNP	886616	T	C	T	PASS	14117	0.175949	PASS	9153	0.368556	1.47545e-05	0.0492603	FBgn0261873	sdt	INTRON
X_811597_SNP	811597	C	C	T	PASS	5671	0.559551	PASS	11235	0.238952	7.21734e-06	0.041548	FBgn0261873	sdt	INTRON
X_811529_SNP	811529	G	T	G	PASS	8924	0.212389	PASS	6582	0.557823	2.01838e-06	0.0276477	FBgn0261873	sdt	INTRON
X_8132253_SNP	8132253	A	A	T	PASS	1242	0.138889	PASS	8764	0.423842	8.39e-06	0.0432966	FBgn0261873	sdt	INTRON
X_8157177_SNP	8157177	C	C	T	PASS	7253	0.424	PASS	1252	0.137931	1.46267e-05	0.0492603	FBgn0030027	CG1632	INTRON
X_8196895_SNP	8196895	A	A	T	PASS	15515	0.882353	PASS	12366	0.349264	2.2834e-06	0.0287076	FBgn0015519	nAChRalpha3	INTRON
X_828722_SNP	828722	A	A	C	PASS	6871	0.517914	PASS	1263	0.192377	2.79864e-06	0.0301364	FBgn0015519	nAChRalpha3	INTRON
X_8291978_SNP	8291978	A	A	T	PASS	6247	0.431193	PASS	1614	0.116667	5.73381e-06	0.0387913	FBgn0040928	CG15345	UTR_5_PRIME
X_8291978_SNP	8291978	A	A	T	PASS	6247	0.431193	PASS	1614	0.116667	5.73381e-06	0.0387913	FBgn0030034	CG1555	UPSTREAM	995
X_8291999_SNP	8291999	G	G	A	PASS	595	0.458716	PASS	1317	0.141667	8.62785e-06	0.0436317	FBgn0040928	CG15345	UTR_5_PRIME
X_8291999_SNP	8291999	G	G	A	PASS	595	0.458716	PASS	1317	0.141667	8.62785e-06	0.0436317	FBgn0030034	CG1555	UPSTREAM	974
X_829264_SNP	829264	T	T	C	PASS	9538	0.285714	PASS	1468	0.519485	1.42764e-05	0.0490633	FBgn0040928	CG15345	START_GAINED
X_829264_SNP	829264	T	T	C	PASS	9538	0.285714	PASS	1468	0.519485	1.42764e-05	0.0490633	FBgn0030034	CG1555	UPSTREAM	99
X_8296345_SNP	8296345	A	A	G	PASS	3245	0.584416	PASS	7216	0.181818	2.57364e-06	0.0296647	FBgn0030034	CG1555	SYNONYMOUS_CODING
X_8321194_SNP	8321194	A	T	A	PASS	4456	0.56	PASS	8117	0.173469	9.93107e-07	0.0238009	FBgn0261793	Trf2	SYNONYMOUS_CODING
X_832121_SNP	832121	T	T	C	PASS	4854	0.529412	PASS	8617	0.165485	2.24455e-06	0.0286974	FBgn0261793	Trf2	NON_SYNONYMOUS_CODING
X_8346871_SNP	8346871	G	G	C	PASS	17214	0.752688	PASS	11352	0.315152	6.85812e-06	0.0399486	FBgn0021767	org-1	INTRON
X_8367198_SNP	8367198	G	G	T	PASS	16315	0.842697	PASS	1451	0.329323	1.00432e-05	0.0448283	FBgn0053223	CG33223	INTRON
X_8367198_SNP	8367198	G	G	T	PASS	16315	0.842697	PASS	1451	0.329323	1.00432e-05	0.0448283	FBgn0014464	Cp7Fa	DOWNSTREAM	78
X_8367198_SNP	8367198	G	G	T	PASS	16315	0.842697	PASS	1451	0.329323	1.00432e-05	0.0448283	FBgn0014465	Cp7Fb	UPSTREAM	672
X_8367214_SNP	8367214	T	T	A	PASS	16717	0.923913	PASS	1452	0.333333	1.51649e-05	0.0497139	FBgn0053223	CG33223	INTRON
X_8367214_SNP	8367214	T	T	A	PASS	16717	0.923913	PASS	1452	0.333333	1.51649e-05	0.0497139	FBgn0014464	Cp7Fa	DOWNSTREAM	94
X_8367214_SNP	8367214	T	T	A	PASS	16717	0.923913	PASS	1452	0.333333	1.51649e-05	0.0497139	FBgn0014465	Cp7Fb	UPSTREAM	656
X_8427279_SNP	8427279	A	G	A	PASS	8493	0.525424	PASS	14845	0.233166	5.27416e-06	0.0376097	FBgn0264975	Nrg	INTRON
X_8469655_SNP	8469655	G	G	T	PASS	12916	0.113448	PASS	9357	0.38	1.04766e-05	0.045289	FBgn0030052	CG1265	INTRON
X_8471554_SNP	8471554	G	G	C	PASS	1857	0.345455	PASS	13312	0.827586	4.84101e-06	0.0370737	FBgn0030052	CG1265	INTRON
X_847355_SNP	847355	A	A	G	PASS	159	0.566377	PASS	13553	0.281915	8.80106e-06	0.0436317	FBgn0030052	CG1265	INTRON
X_874924_SNP	874924	C	T	C	PASS	6396	0.637736	PASS	1356	0.317527	7.06723e-06	0.0410084	Intergenic	Intergenic
X_8776585_SNP	8776585	A	A	G	PASS	4782	0.635659	PASS	165	0.325128	1.23417e-05	0.0472394	FBgn0011661	Moe	INTRON
X_88628_SNP	88628	C	C	T	PASS	1459	0.584416	PASS	1563	0.375	2.73536e-08	0.00378329	FBgn0261549	rdgA	INTRON
X_88628_SNP	88628	C	C	T	PASS	1459	0.584416	PASS	1563	0.375	2.73536e-08	0.00378329	FBgn0263519	mir-4964	DOWNSTREAM	83
X_8891624_SNP	8891624	G	A	G	PASS	9694	0.494737	PASS	13337	0.217648	1.45412e-05	0.0492603	FBgn0264384	CR43836	INTRON
X_8891624_SNP	8891624	G	A	G	PASS	9694	0.494737	PASS	13337	0.217648	1.45412e-05	0.0492603	FBgn0261549	rdgA	INTRON
X_89435_SNP	89435	T	C	T	PASS	9926	0.28	PASS	7182	0.535948	3.16557e-06	0.0308118	FBgn0261549	rdgA	INTRON
X_89435_SNP	89435	T	C	T	PASS	9926	0.28	PASS	7182	0.535948	3.16557e-06	0.0308118	FBgn0264384	CR43836	INTRON
X_891629_SNP	891629	C	T	C	PASS	5271	0.577236	PASS	11337	0.246667	4.55274e-06	0.035772	FBgn0264384	CR43836	INTRON
X_891629_SNP	891629	C	T	C	PASS	5271	0.577236	PASS	11337	0.246667	4.55274e-06	0.035772	FBgn0261549	rdgA	INTRON
X_8969881_SNP	8969881	G	G	A	PASS	7251	0.414634	PASS	13418	0.118421	4.59945e-06	0.035772	FBgn0265413	CG44325	INTRON
X_8991515_SNP	8991515	G	G	C	PASS	12219	0.134752	PASS	9366	0.415943	9.22453e-06	0.0436317	FBgn0030087	CG7766	INTRON
X_932933_SNP	932933	T	A	T	PASS	75126	0.626866	PASS	13562	0.314728	1.32102e-06	0.0258829	FBgn0261260	mgl	INTRON
X_9329323_SNP	9329323	A	C	A	PASS	69125	0.64433	PASS	13362	0.317949	5.23534e-07	0.0194561	FBgn0261260	mgl	INTRON
X_9329338_SNP	9329338	T	C	T	PASS	64123	0.657754	PASS	13164	0.328251	4.79107e-07	0.0190555	FBgn0261260	mgl	INTRON
X_9384253_SNP	9384253	A	A	C	PASS	9353	0.363137	PASS	14517	0.149383	1.39656e-05	0.0487628	FBgn0261260	mgl	INTRON
X_9385649_SNP	9385649	T	T	A	PASS	5798	0.632259	PASS	1852	0.325	9.88751e-06	0.0446619	FBgn0261260	mgl	INTRON
X_9385674_SNP	9385674	A	A	G	PASS	6111	0.623457	PASS	11354	0.323353	1.1843e-05	0.0470661	FBgn0261260	mgl	INTRON
X_967382_SNP	967382	A	A	T	PASS	11858	0.329545	PASS	15115	0.936145	1.47288e-05	0.0492603	Intergenic	Intergenic
